# Supplementary material for: Multi-omics analysis reveals metabolic disruptions in cardiac tissues of aging nonhuman primates with spontaneous type 2 diabetes
Source: Aging (Albany NY). 2025 Jun 2;17(6):1386–404. doi: 10.18632/aging.206261 (PMC12245199; doi:10.18632/aging.206261)
Supplement: Supplementary Table 1 [file aging-17-206261-s002.xlsx]

## Sheet: Sheet2
Supplementary Table 1. Significantly altered proteins in the OB and TM groups versus the CON group.
Class	Name	HMDBID	KeggID	Pathway	p.value
Amino acids	L_Alanine	HMDB0000161	C00041	Alanine, aspartate and glutamate metabolism; Cysteine and methionine metabolism; Taurine and hypotaurine metabolism; Selenocompound metabolism; D-Alanine metabolism; Carbon fixation in photosynthetic organisms; Aminoacyl-tRNA biosynthesis; Biosynthesis of plant secondary metabolites; Metabolic pathways; Microbial metabolism in diverse environments; Carbon metabolism; Biosynthesis of amino acids; …	0.0253475
Amino acids	Dimethylglycine	HMDB0000092	C01026	Glycine, serine and threonine metabolism; Metabolic pathways	0.0150678
Amino acids	Gamma_Aminobutyric acid	HMDB0000112	C00334	Alanine, aspartate and glutamate metabolism; Arginine and proline metabolism; beta-Alanine metabolism; Butanoate metabolism; Nicotinate and nicotinamide metabolism; Metabolic pathways; Microbial metabolism in diverse environments; Quorum sensing; cAMP signaling pathway; Neuroactive ligand-receptor interaction; Synaptic vesicle cycle; Retrograde endocannabinoid signaling; GABAergic synapse; Taste …	0.000158305
Organic acids	Threonic acid	HMDB0000943	C01620	NA	0.0441631
Amino acids	Methylcysteine	HMDB0002108	NA	NA	0.0278106
Amino acids	L_Aspartic acid	HMDB0000191	C00049	Aspartate Metabolism	0.0276161
Amino acids	N_Acetyl_L_alanine	HMDB0000766	NA	NA	0.0140615
Indoles	Indoleacetic acid	HMDB0000197	C00954	Tryptophan metabolism; Biosynthesis of plant hormones; Metabolic pathways; Plant hormone signal transduction	0.0189736
Fatty acids	Azelaic acid	HMDB0000784	C08261	NA	0.00380239
Amino acids	Glycine	HMDB0000123	C00037	Primary bile acid biosynthesis; Purine metabolism; Glycine, serine and threonine metabolism; Lysine degradation; Phosphonate and phosphinate metabolism; Cyanoamino acid metabolism; Glutathione metabolism; Glyoxylate and dicarboxylate metabolism; Methane metabolism; Thiamine metabolism; Porphyrin and chlorophyll metabolism; Aminoacyl-tRNA biosynthesis; Biosynthesis of plant secondary metabolites; …	0.0373366
Amino acids	L_Alpha_aminobutyric acid	HMDB0000452	C02356	Cysteine and methionine metabolism; Metabolic pathways	0.0133453
Carbohydrates	Erythronic acid	HMDB0000613	NA	NA	0.031244
Amino acids	N_Acetylglutamine	HMDB0006029	NA	NA	0.0345842
Fatty acids	Acetic acid	HMDB0000042	C00033	Glycolysis / Gluconeogenesis; Taurine and hypotaurine metabolism; Phosphonate and phosphinate metabolism; Glycosaminoglycan biosynthesis - heparan sulfate / heparin; Pyruvate metabolism; Glyoxylate and dicarboxylate metabolism; Propanoate metabolism; C5-Branched dibasic acid metabolism; Methane metabolism; Carbon fixation pathways in prokaryotes; Zeatin biosynthesis; Sulfur metabolism; Metabolic …	0.0188409
Carbohydrates	D_Xylose	HMDB0000098	C00181	Pentose and glucuronate interconversions; Amino sugar and nucleotide sugar metabolism; Metabolic pathways; ABC transporters	0.0110933
Carbohydrates	D_Fructose	HMDB0000660	C00795	Galactose metabolism; Metabolic pathways	0.00682902
Fatty acids	Pimelic acid	HMDB0000857	C02656	Biotin metabolism; Metabolic pathways	0.047154
Fatty acids	Suberic acid	HMDB0000893	C08278	NA	0.0132121
Bile acids	Ursodeoxycholic acid	HMDB0000946	C07880	Secondary bile acid biosynthesis	0.0338667
Fatty acids	Dodecanoic acid	HMDB0000638	C02679	Fatty acid biosynthesis; Prodigiosin biosynthesis; Metabolic pathways; Biosynthesis of antibiotics	0.0160668
Fatty acids	Myristoleic acid	HMDB0002000	C08322	NA	0.00546325
Bile acids	Lithocholic acid	HMDB0000761	C03990	Secondary bile acid biosynthesis; Bile secretion	0.0231127
Bile acids	Deoxycholic acid	HMDB0000626	C04483	Secondary bile acid biosynthesis; Bile secretion	0.036776
Fatty acids	Myristic acid	HMDB0000806	C06424	Fatty acid biosynthesis; Metabolic pathways	0.027764
Fatty acids	9_Pentadecenoic acid	NA	NA	NA	0.0105446
Fatty acids	Palmitoleic acid	HMDB0003229	C08362	Fatty acid biosynthesis	0.0012414
Fatty acids	10,13 Nonadecadienoic Acid	NA	NA	NA	0.0401572
Fatty acids	Arachidonic acid	HMDB0001043	C00219	Arachidonic acid metabolism; Linoleic acid metabolism; Biosynthesis of unsaturated fatty acids; Metabolic pathways; Ferroptosis; Necroptosis; Vascular smooth muscle contraction; Platelet activation; Fc epsilon RI signaling pathway; Fc gamma R-mediated phagocytosis; Retrograde endocannabinoid signaling; Serotonergic synapse; Long-term depression; Phototransduction - fly; Inflammatory mediator regu…	0.0123898
Fatty acids	8,11,14_Eicosatrienoic acid	NA	NA	NA	0.0251779
Fatty acids	Adrenic acid	NA	NA	NA	0.0173564
Organic acids	Citramalic acid	HMDB0000426	C00815	NA	0.0293201
Fatty acids	Oleic acid	HMDB0000207	C00712	Fatty acid biosynthesis; Cutin, suberine and wax biosynthesis; Biosynthesis of unsaturated fatty acids; Biosynthesis of plant secondary metabolites; Longevity regulating pathway - worm	0.000678117
Fatty acids	Nonadeca_10Z_enoic acid	HMDB0013622	NA	NA	0.000192391
Fatty acids	Eicosadienoic acid	HMDB0005060	C16525	Biosynthesis of unsaturated fatty acids	0.000750517
Fatty acids	11_cis_Eicosenoic acid	HMDB0002231	C16526	Biosynthesis of unsaturated fatty acids	0.00673277
Fatty acids	13,16,19_docosatrienoic acid	HMDB0002823	NA	NA	0.00277729
carnitines	3-Hydroxybutyrylcarnitine	HMDB0062735	NA	NA	0.000731746
carnitines	2-Methylbutyroylcarnitine	HMDB0000378	NA	NA	0.0484771
carnitines	Glutarylcarnitine	HMDB0013130	NA	NA	0.00311882
