# Supplementary material for: Multi-omics analysis reveals metabolic disruptions in cardiac tissues of aging nonhuman primates with spontaneous type 2 diabetes
Source: Aging (Albany NY). 2025 Jun 2;17(6):1386–404. doi: 10.18632/aging.206261 (PMC12245199; doi:10.18632/aging.206261)
Supplement: Supplementary Table 4 [file aging-17-206261-s004.xlsx]

## Sheet: proteinGroups
Supplementary Table 4. The Physiological indicators of experimental monkeys.
Protein	Protein Name	Gene Name	ProteinGroup	FastaHeaders	Proteins	Peptides	UniquePeptides	RazorUniquePeptides	Coverage	MolWeight	LFQ intensity CON-1	LFQ intensity CON-2	LFQ intensity CON-3	LFQ intensity OB-1	LFQ intensity OB-2	LFQ intensity OB-3	LFQ intensity TM-1	LFQ intensity TM-2	LFQ intensity TM-3
A0A088CE56	NADH-ubiquinone oxidoreductase chain 2	ND2	A0A088CE56;W5S209	A0A088CE56_MACMU NADH-ubiquinone oxidoreductase chain 2 OS=Macaca mulatta OX=9544 GN=ND2 PE=3 SV=1;W5S209_MACMU NADH-ubiquinone oxidoreductase chain 2 OS=Macaca mulatta lasiotus OX=1449913 GN=ND2 PE=3 SV=1	2	2	1	1	12.7	38.957	58642000
Q49N87	Cytochrome c oxidase subunit 3 (Fragment)		Q49N87;Q49N85;Q49N84;W5S213;Q6IYH2;A0A343DQZ0;A0A0U2CJB2;A0A088CE59	Q49N87_MACMU Cytochrome c oxidase subunit 3 (Fragment) OS=Macaca mulatta OX=9544 PE=3 SV=1;Q49N85_MACMU Cytochrome c oxidase subunit 3 (Fragment) OS=Macaca mulatta OX=9544 PE=3 SV=1;Q49N84_MACMU Cytochrome c oxidase subunit 3 (Fragment) OS=Macaca mulatta O	8	1	1	1	8.2	19.241	3300300000	5076200000	1548700000	1567700000	3136000000	1383800000	4690700000	5732800000	2702800000
W5S216	NADH-ubiquinone oxidoreductase chain 6	ND6	W5S216;Q6IYG7;A0A343DQZ5;A0A0U2CHD9;A0A088CE65	W5S216_MACMU NADH-ubiquinone oxidoreductase chain 6 OS=Macaca mulatta lasiotus OX=1449913 GN=ND6 PE=3 SV=1;Q6IYG7_MACMU NADH-ubiquinone oxidoreductase chain 6 OS=Macaca mulatta OX=9544 GN=ND6 PE=3 SV=1;A0A343DQZ5_MACMU NADH-ubiquinone oxidoreductase chain	5	1	1	1	8	18.629	95821000	32649000	13052000		33915000		45093000		53384000
W5S257	NADH-ubiquinone oxidoreductase chain 4	ND4	W5S257;A0A088CEA3;G9IZA6;A0A0U2CIV3	W5S257_MACMU NADH-ubiquinone oxidoreductase chain 4 OS=Macaca mulatta lasiotus OX=1449913 GN=ND4 PE=3 SV=1;A0A088CEA3_MACMU NADH-ubiquinone oxidoreductase chain 4 OS=Macaca mulatta OX=9544 GN=ND4 PE=3 SV=1;G9IZA6_MACMU NADH-ubiquinone oxidoreductase chain	4	4	1	1	12	52.044	31843000
W5S280	NADH-ubiquinone oxidoreductase chain 3	ND3	W5S280;Q6IYH1;A0A343DQZ1;A0A0U2CI36;A0A088CEX5	W5S280_MACMU NADH-ubiquinone oxidoreductase chain 3 OS=Macaca mulatta lasiotus OX=1449913 GN=ND3 PE=3 SV=1;Q6IYH1_MACMU NADH-ubiquinone oxidoreductase chain 3 OS=Macaca mulatta OX=9544 GN=ND3 PE=3 SV=1;A0A343DQZ1_MACMU NADH-ubiquinone oxidoreductase chain	5	1	1	1	13	13.216	35608000	52789000					26547000	34428000	17646000
W5S381	NADH-ubiquinone oxidoreductase chain 1	ND1	W5S381;Q6IYH8;A0A343DQY4;A0A0U2CJC9;A0A088CFX2	W5S381_MACMU NADH-ubiquinone oxidoreductase chain 1 OS=Macaca mulatta lasiotus OX=1449913 GN=ND1 PE=3 SV=1;Q6IYH8_MACMU NADH-ubiquinone oxidoreductase chain 1 OS=Macaca mulatta OX=9544 GN=ND1 PE=3 SV=1;A0A343DQY4_MACMU NADH-ubiquinone oxidoreductase chain	5	3	3	3	11.9	35.561	266400000	378860000	202900000	184650000	150630000	103100000	207900000	282670000	340720000
A0A088CFX4	NADH-ubiquinone oxidoreductase chain 5	ND5	A0A088CFX4;W5S389;A0A343DQZ4;A0A088CE92;Q6IYG8	A0A088CFX4_MACMU NADH-ubiquinone oxidoreductase chain 5 OS=Macaca mulatta OX=9544 GN=ND5 PE=3 SV=1;W5S389_MACMU NADH-ubiquinone oxidoreductase chain 5 OS=Macaca mulatta lasiotus OX=1449913 GN=ND5 PE=3 SV=1;A0A343DQZ4_MACMU NADH-ubiquinone oxidoreductase ch	5	8	8	8	20	67.435	2499800000	2273700000	1432500000	1757000000	1467100000	1083700000	1956500000	2023000000	2420100000
A0A0H4LDQ5	Immunglobulin light chain variable region (Fragment)		A0A0H4LDQ5;G7NAZ1;A0A0H4LVB5;A0A0H4LJN8;A0A0H4LJM0;A0A0H4LFQ0;A0A0H4LDW3;G7NAZ4;A0A1D5R0W6	A0A0H4LDQ5_MACMU Immunglobulin light chain variable region (Fragment) OS=Macaca mulatta OX=9544 PE=2 SV=1;G7NAZ1_MACMU Uncharacterized protein (Fragment) OS=Macaca mulatta OX=9544 GN=EGK_05701 PE=4 SV=1;A0A0H4LVB5_MACMU Immunglobulin light chain variable r	9	2	2	2	31.8	11.673	555590000	109240000	172890000	109740000	93811000	68926000	116730000	320320000	191760000
A0A0H4LDU5	Immunglobulin light chain variable region (Fragment)		A0A0H4LDU5;A0A1D5QZG2	A0A0H4LDU5_MACMU Immunglobulin light chain variable region (Fragment) OS=Macaca mulatta OX=9544 PE=2 SV=1;A0A1D5QZG2_MACMU Uncharacterized protein OS=Macaca mulatta OX=9544 PE=4 SV=1	2	1	1	1	10.3	11.648		32879000							26704000
A0A0H4LHQ3	Immunglobulin light chain variable region (Fragment)		A0A0H4LHQ3;A0A0H4LFN4	A0A0H4LHQ3_MACMU Immunglobulin light chain variable region (Fragment) OS=Macaca mulatta OX=9544 PE=2 SV=1;A0A0H4LFN4_MACMU Immunglobulin light chain variable region (Fragment) OS=Macaca mulatta OX=9544 PE=2 SV=1	2	1	1	1	16.4	11.808	38151000		18353000					17851000
A0A0H4LJP9	Immunglobulin light chain variable region (Fragment)		A0A0H4LJP9;A0A0H4LFQ9	A0A0H4LJP9_MACMU Immunglobulin light chain variable region (Fragment) OS=Macaca mulatta OX=9544 PE=2 SV=1;A0A0H4LFQ9_MACMU Immunglobulin light chain variable region (Fragment) OS=Macaca mulatta OX=9544 PE=2 SV=1	2	1	1	1	16.8	11.475	19291000							27313000
A0A1D5RGA5	Uncharacterized protein		A0A1D5RGA5;A0A0H4LHQ8;A0A1D5QQL7	A0A1D5RGA5_MACMU Uncharacterized protein OS=Macaca mulatta OX=9544 PE=4 SV=1;A0A0H4LHQ8_MACMU Immunglobulin light chain variable region (Fragment) OS=Macaca mulatta OX=9544 PE=2 SV=1;A0A1D5QQL7_MACMU Uncharacterized protein OS=Macaca mulatta OX=9544 PE=4 S	3	1	1	1	17.6	10.904	60366000		39416000
A0A0H4LJN0	Immunglobulin light chain variable region (Fragment)		A0A0H4LJN0	A0A0H4LJN0_MACMU Immunglobulin light chain variable region (Fragment) OS=Macaca mulatta OX=9544 PE=2 SV=1	1	1	1	1	16.8	11.415			90475000	80756000
G8F222	Uncharacterized protein (Fragment)	EGK_21131	G8F222;A0A0H4LVA9;F6S1S2;F7GXR9;F7C506	G8F222_MACMU Uncharacterized protein (Fragment) OS=Macaca mulatta OX=9544 GN=EGK_21131 PE=4 SV=1;A0A0H4LVA9_MACMU Immunglobulin light chain variable region (Fragment) OS=Macaca mulatta OX=9544 PE=2 SV=1;F6S1S2_MACMU Uncharacterized protein OS=Macaca mulatt	5	1	1	1	12.5	11.299	92480000	67389000						64020000
A0A0H4LVG0	Immunglobulin light chain variable region (Fragment)		A0A0H4LVG0	A0A0H4LVG0_MACMU Immunglobulin light chain variable region (Fragment) OS=Macaca mulatta OX=9544 PE=2 SV=1	1	1	1	1	16.8	11.514								30479000
F7EI55	Uncharacterized protein	OAS1	F7EI55;A0A0K0N4I1;A0A0K0N4H4;A0A0K0N4W8;A0A0K0N4Q1;A0A0K0N465;F7EI59;A4LAA0;A4LA99;A0A3S7SJR0;A0A0K0N4P9;F6WKL3	F7EI55_MACMU Uncharacterized protein OS=Macaca mulatta OX=9544 GN=OAS1 PE=4 SV=2;A0A0K0N4I1_MACMU 2-5 oligoadenylate stnthetase 1 (Fragment) OS=Macaca mulatta OX=9544 GN=OAS1 PE=4 SV=1;A0A0K0N4H4_MACMU 2-5 oligoadenylate stnthetase 1 (Fragment) OS=Maca	12	3	3	3	10.8	41.411		38432000					78751000
B6DYA7	MHC class I antigen (Fragment)	Mamu-B	B6DYA7;B6DYA5;B1A7U6;B1A7U5;B1A7U3;A1YN82;A1YN81;A0SXI3;A0SXI2;A0SXI1;A0SXI0;A0SXH9;A0SXH8;Q70PL4;Q5TM32;C6L2H6;C6L2H5;B2ZHY5;B0Z9U6;B0Z9U5;A0A2H1N008;A0A1G4P1A8;A0A1G4P169;A0A0N7MNH1;B5M459;B2LW71	B6DYA7_MACMU MHC class I antigen (Fragment) OS=Macaca mulatta OX=9544 GN=Mamu-B PE=3 SV=1;B6DYA5_MACMU MHC class I antigen (Fragment) OS=Macaca mulatta OX=9544 GN=Mamu-B PE=3 SV=1;B1A7U6_MACMU MHC class I antigen (Fragment) OS=Macaca mulatta OX=9544 GN=Mam	26	3	0	1	16.8	31.559
B6DY98	MHC class I antigen (Fragment)	Mamu-A1	B6DY98;B1A7T8;Q70UQ4;B7SKQ4;B7SKP7;A1JUQ6;A1JUQ5;Q30596;Q5TM76;C4PJP7;A0A1G4P140;A0A0P1L538;B1A7U2;B1A7T4;Q9TNR3;A0A0H5BZV5;A0A0H5BVH9;B8Q9F9;B8Q9F6;A1JUS9;D5KRB4;I6VVU3;A0A0P1L5R1;A0A2H1MZN1;M1QQN0;B7XC20;W6AYN9;W6ANT6;D5MSE6;B7XC21;B7XC09;C9K4Z2;C9K4Y3;B1A7X1;C6L2J5;A0A1G4P1H8;A0A0N7MNI0;E0WAD6;A0A2H1MZL0;M1RRF3;D5MSC2;B7XC52;A0A1S7D7M4;W6AYP9;W6AQC5;W6APG1;W6ANU8;K4MTQ3;A0A2H1N035;K4MU36;C6K36…	B6DY98_MACMU MHC class I antigen (Fragment) OS=Macaca mulatta OX=9544 GN=Mamu-A1 PE=3 SV=1;B1A7T8_MACMU MHC class I antigen (Fragment) OS=Macaca mulatta OX=9544 GN=Mamu-A PE=3 SV=1;Q70UQ4_MACMU MHC class I antigen (Fragment) OS=Macaca mulatta OX=9544 GN=Ma	72	7	0	1	35.9	31.54			31754000
E0WHL9	MHC class I antigen (Fragment)	Mamu-B	E0WHL9;B0JDW0;B0JDV9;A9XN44;A5Z1S3;A0A2H1MYF9;A0A1G4P1D7;A0A0P1L5P6;E0WHL8	E0WHL9_MACMU MHC class I antigen (Fragment) OS=Macaca mulatta OX=9544 GN=Mamu-B PE=2 SV=1;B0JDW0_MACMU MHC class I antigen (Fragment) OS=Macaca mulatta OX=9544 GN=Mamu-B PE=2 SV=1;B0JDV9_MACMU MHC class I antigen (Fragment) OS=Macaca mulatta OX=9544 GN=Mam	9	5	0	1	19.9	39.569						25612000
B7SKU3	MHC class I antigen (Fragment)	Mamu-A1	B7SKU3;A9LPC1;A0A0P1L5T0;A0A1W7LI14;A1YN66;A1YN65;A1YN64;A1YN57;A1YN45;A0SXH2;Q9MXT2;Q70SH8;Q70SH7;D8WRL6;D8WRL2;B6E636;B6E635;B6E629;B8Q9K1;B1A4T6;A1JUW7;A1JUW6;A1JUW5;B5ARF5;A1JUX1;A1JUX0;V5NSD5;V5NUB7;A0A0P1L5T1;A0A1G4P139;A5Z0T1;A2IBC7;A0A1G4P198;A0A0P1L5C0;A9XN15;A0A2H1MZP4;A0A1G4P157;A0A0P1L637;M1RK04;E0WHN9;B7SKS4;B8Q9K8;B8Q9K2;B7SKQ1;B7SKQ0;B8Q9I4;B5ARF0;A1JUU0;A1JUT9;Q30720;I6VCY3;B6D1X8…	B7SKU3_MACMU MHC class I antigen (Fragment) OS=Macaca mulatta OX=9544 GN=Mamu-A1 PE=2 SV=1;A9LPC1_MACMU MHC class I antigen (Fragment) OS=Macaca mulatta OX=9544 GN=Mamu-A1 PE=2 SV=1;A0A0P1L5T0_MACMU MHC class 1 protein OS=Macaca mulatta OX=9544 GN=Mamu-A1	145	8	0	2	30.5	39.709		88576000	92200000	35935000	42211000	86339000	39287000	78434000	117370000
Q70UQ3	MHC class I antigen (Fragment)	Mamu-A	Q70UQ3;Q30597;A0A0P1L9T8;B8Q9K6;B8Q9J7;F7GQK4;A0A0P1L565;H9H4S9;F7CPG3;A0A1D5R4Y3;Q70UE4;D8WRK0;B8Q9H0;B8Q9L0;B8Q9G2;B8Q9G1;A0A0P1L5G2;Q9MXS8;W6AP99;H9H4C6;B6D1X1;E2CXK0;D8WRJ8;C5J9C8;D8WRJ7;D8WRJ6;C5J9C7;B8Q9J4;B8Q9H2;B8Q9G8;B8Q9G7;B8Q9G6;B8Q9G5;B8Q9G4;B7SKU2;B7SKT5;B7SKT4;B7SKT3;B3VK26;B2CCZ0;A1JUU4;A1JUT4;B8Q9G0;D5KRC0;C6L2J9;D5KRC6;D8VDZ3;B6D1X2;A0A1G4P1C2;I6W815;M1RJZ4;M1RE05;M1RDZ6;D5MSE7;C…	Q70UQ3_MACMU MHC class I antigen (Fragment) OS=Macaca mulatta OX=9544 GN=Mamu-A PE=2 SV=1;Q30597_MACMU MHC class I Mamu-A*02 (Fragment) OS=Macaca mulatta OX=9544 PE=1 SV=1;A0A0P1L9T8_MACMU MHC class 1 protein OS=Macaca mulatta OX=9544 GN=Mamu-A1 PE=2 SV=1;	170	8	0	1	29.9	39.861			44530000
A0A0U2CJ50	ATP synthase protein 8	ATP8	A0A0U2CJ50;A0A088CE98;W5S253;A0A343DQY8	A0A0U2CJ50_MACMU ATP synthase protein 8 OS=Macaca mulatta brevicaudus OX=1654737 GN=ATP8 PE=3 SV=1;A0A088CE98_MACMU ATP synthase protein 8 OS=Macaca mulatta OX=9544 GN=ATP8 PE=3 SV=1;W5S253_MACMU ATP synthase protein 8 OS=Macaca mulatta lasiotus OX=1449913	4	2	2	2	33.8	8.0694	86886000	33688000			41169000	20448000	38939000	103410000	73032000
A0A140TAV0	Uncharacterized protein	HBA1	A0A140TAV0;A0A1D5QS41	A0A140TAV0_MACMU Uncharacterized protein OS=Macaca mulatta OX=9544 GN=HBA1 PE=3 SV=2;A0A1D5QS41_MACMU Uncharacterized protein OS=Macaca mulatta OX=9544 GN=HBA1 PE=3 SV=1	2	10	3	3	73.3	14.187		551030000	1320300000						119720000
D2CK94	MHC class I antigen	Mamu-B	D2CK94;C6L2I5;C6L2H1;Q30719;B6D1Y5;A0A143ZWV3;C6JUG2;D4N3M9;B0JDS7;Q5ZEW0;E0WHN0;C5J9E1;B0JDV6;A8QWY9;E0WHM2;B0JDT5;B0JDT4;B0JDT3;Q70PM6;B0JDS5;B0JDS4;B0JDS3;A8QWZ2;A0A1D5QJU6;Q9MW41;Q70PM9;B0JDT6;A0A1D5QS79;D5KRK5;D5KRH6;V5NSD8;B2LW72;A0A0P1L5J8;A0A1D5QFX8;H9H3U5;Q5TM37;B6D1X9;A0A1N7SYF1;A0A0P1L6V0;Q9MXS4;E3UVD5;B5M457;B2LW70;A3FEZ5;A0A1D5QRW4;A0A0N7MNH0;A0A1D5QW75;A0A1D5Q0E8;A0A1D5QW49;B0Z9U9;A…	D2CK94_MACMU MHC class I antigen OS=Macaca mulatta OX=9544 GN=Mamu-B PE=2 SV=1;C6L2I5_MACMU MHC class I antigen OS=Macaca mulatta OX=9544 GN=Mamu-B PE=2 SV=1;C6L2H1_MACMU MHC class I antigen OS=Macaca mulatta OX=9544 GN=Mamu-B PE=2 SV=1;Q30719_MACMU MHC cl	193	6	0	1	23.4	40.083	56102000					29851000	87297000	56742000	42336000
A0A1D5Q066	Uncharacterized protein	SPCS2	A0A1D5Q066;H9FCM9;F7GCF5;G7NEC2;A0A1D5QFL2	A0A1D5Q066_MACMU Uncharacterized protein OS=Macaca mulatta OX=9544 GN=SPCS2 PE=4 SV=1;H9FCM9_MACMU Signal peptidase complex subunit 2 (Fragment) OS=Macaca mulatta OX=9544 GN=SPCS2 PE=2 SV=1;F7GCF5_MACMU Signal peptidase complex subunit 2 OS=Macaca mulatta	5	1	1	1	12.1	17.038									18782000
G7N881	Sodium channel protein (Fragment)	EGK_04497	G7N881;F7AFH6;A0A1D5Q072	G7N881_MACMU Sodium channel protein (Fragment) OS=Macaca mulatta OX=9544 GN=EGK_04497 PE=3 SV=1;F7AFH6_MACMU Sodium channel protein OS=Macaca mulatta OX=9544 GN=SCN7A PE=3 SV=2;A0A1D5Q072_MACMU Sodium channel protein OS=Macaca mulatta OX=9544 GN=SCN7A PE=3	3	1	1	1	0.8	171.26
F6XX42	Uncharacterized protein	POLDIP3	F6XX42;G7N439;H9YY23;A0A1D5Q073;F6SQ17;F6SJA8	F6XX42_MACMU Uncharacterized protein OS=Macaca mulatta OX=9544 GN=POLDIP3 PE=4 SV=1;G7N439_MACMU Uncharacterized protein OS=Macaca mulatta OX=9544 GN=EGK_03115 PE=4 SV=1;H9YY23_MACMU Polymerase delta-interacting protein 3 isoform 2 OS=Macaca mulatta OX=954	6	1	1	1	7	20.126
H9FUZ9	Nuclear mitotic apparatus protein 1	NUMA1	H9FUZ9;G7NE84;F7EE62;F7EDX5;A0A1D5Q088;F7EDX0	H9FUZ9_MACMU Nuclear mitotic apparatus protein 1 OS=Macaca mulatta OX=9544 GN=NUMA1 PE=2 SV=1;G7NE84_MACMU Nuclear mitotic apparatus protein 1 OS=Macaca mulatta OX=9544 GN=EGK_06640 PE=4 SV=1;F7EE62_MACMU Uncharacterized protein OS=Macaca mulatta OX=9544 G	6	8	8	8	4.5	238.79	29416000	20229000	50325000	38589000	46383000	53232000	26208000	26590000
F7ALN6	Uncharacterized protein	C7	F7ALN6;A0A1D5Q0A8;I0FIZ6;H9ZD35;G7MV54	F7ALN6_MACMU Uncharacterized protein OS=Macaca mulatta OX=9544 GN=C7 PE=4 SV=2;A0A1D5Q0A8_MACMU Uncharacterized protein OS=Macaca mulatta OX=9544 GN=C7 PE=4 SV=1;I0FIZ6_MACMU Complement component C7 OS=Macaca mulatta OX=9544 GN=C7 PE=2 SV=1;H9ZD35_MACMU Co	5	4	4	4	7.2	93.419	175260000	133110000	200740000	48446000			178150000	37038000	203630000
G7NAS4	60S ribosomal protein L31 isoform 3	RPL31	G7NAS4;I2CXG5;G7NGF5;F7A234;A0A1D5Q0B2;G7NK25;F6YSE6;F7HTB1;G7N510;F7B261;A0A1D5QXV9;G7NJG4;F7CVX1;F7GDK1;F7BJA2;A0A1D5QLJ2;F7GU88	G7NAS4_MACMU 60S ribosomal protein L31 isoform 3 OS=Macaca mulatta OX=9544 GN=RPL31 PE=2 SV=1;I2CXG5_MACMU 60S ribosomal protein L31 isoform 1 OS=Macaca mulatta OX=9544 GN=RPL31 PE=2 SV=1;G7NGF5_MACMU 60S ribosomal protein L31 isoform 1 OS=Macaca mulatta O	17	3	3	3	25.6	13.995	93062000	147690000	203200000	201690000	318960000	101630000	118170000	61222000	84003000
F6UM19	Uncharacterized protein	KRIT1	F6UM19;A0A1D5Q0D0	F6UM19_MACMU Uncharacterized protein OS=Macaca mulatta OX=9544 GN=KRIT1 PE=4 SV=1;A0A1D5Q0D0_MACMU Krev interaction trapped protein 1 isoform 1 OS=Macaca mulatta OX=9544 GN=KRIT1 PE=2 SV=1	2	1	1	1	2	78.641		28651000			20948000
A0A1D5R1I5	Uncharacterized protein	ZNF207	A0A1D5R1I5;F7BPU6;A0A1D5Q0D8;H9ZDC8;A0A1D5QG44;H9YV82;A0A1D5R7A6;G7NGU4;F7BQH6;H9FZK5;F7BQE6	A0A1D5R1I5_MACMU Uncharacterized protein OS=Macaca mulatta OX=9544 GN=ZNF207 PE=4 SV=1;F7BPU6_MACMU Uncharacterized protein OS=Macaca mulatta OX=9544 GN=ZNF207 PE=4 SV=2;A0A1D5Q0D8_MACMU Uncharacterized protein OS=Macaca mulatta OX=9544 GN=ZNF207 PE=4 SV=1	11	1	1	1	3.5	36.814			28752000	26585000	25508000	28513000
F7GWF5	Uncharacterized protein	DSG2	F7GWF5;A0A1D5Q0F3;G7NKJ7	F7GWF5_MACMU Uncharacterized protein OS=Macaca mulatta OX=9544 GN=DSG2 PE=4 SV=2;A0A1D5Q0F3_MACMU Uncharacterized protein OS=Macaca mulatta OX=9544 GN=DSG2 PE=4 SV=1;G7NKJ7_MACMU HDGC OS=Macaca mulatta OX=9544 GN=EGK_09612 PE=4 SV=1	3	19	19	19	24.8	121.81	631350000	428290000	335730000	416840000	339910000	319150000	515210000	462180000	485100000
A0A1D5Q0G5	Eukaryotic translation initiation factor 5A	EIF5A	A0A1D5Q0G5;F7HNN9;A0A1D5RIZ9;A0A1D5Q4L3;F6WM55	A0A1D5Q0G5_MACMU Eukaryotic translation initiation factor 5A OS=Macaca mulatta OX=9544 GN=EIF5A PE=3 SV=1;F7HNN9_MACMU Eukaryotic translation initiation factor 5A-1 OS=Macaca mulatta OX=9544 GN=EIF5A PE=2 SV=1	5	11	11	11	70.8	16.832	745910000	917420000	1759300000	1843100000	2093000000	1163400000	756580000	724160000	683350000
F7H483	Uncharacterized protein	ACADM	F7H483;H9EWB2;A0A1D5R5U7;A0A1D5Q0H4;F7EKG6;A0A1D5RET0;G7MHL1	F7H483_MACMU Uncharacterized protein OS=Macaca mulatta OX=9544 GN=ACADM PE=3 SV=2;H9EWB2_MACMU Medium-chain specific acyl-CoA dehydrogenase, mitochondrial isoform a OS=Macaca mulatta OX=9544 GN=ACADM PE=2 SV=1;A0A1D5R5U7_MACMU Uncharacterized protein OS=Ma	7	22	22	22	62.4	45.467	9951800000	10634000000	4759400000	9899300000	8026900000	10244000000	7830500000	14727000000	10857000000
G7NQA0	Uncharacterized protein (Fragment)	EGK_13124	G7NQA0;F7EWF3;A0A1D5Q0N0	G7NQA0_MACMU Uncharacterized protein (Fragment) OS=Macaca mulatta OX=9544 GN=EGK_13124 PE=3 SV=1;F7EWF3_MACMU Uncharacterized protein OS=Macaca mulatta OX=9544 GN=SPG7 PE=4 SV=2;A0A1D5Q0N0_MACMU Uncharacterized protein OS=Macaca mulatta OX=9544 GN=SPG7 PE=	3	1	1	1	1.2	81.936						13227000	15294000	18650000
G7N4Y7	Uncharacterized protein	EGK_02458	G7N4Y7;H9F5U5;I2CTI9;F7H0J8;F7H0J6;A0A1D5Q0P6	G7N4Y7_MACMU Uncharacterized protein OS=Macaca mulatta OX=9544 GN=EGK_02458 PE=4 SV=1;H9F5U5_MACMU Copine-1 isoform a (Fragment) OS=Macaca mulatta OX=9544 GN=CPNE1 PE=2 SV=1;I2CTI9_MACMU Copine-1 isoform b OS=Macaca mulatta OX=9544 GN=CPNE1 PE=2 SV=1;F7H0J	6	2	2	2	5.4	58.451	20786000	9764500	47614000	27490000	41456000	13626000	18545000	12028000
A0A1D5Q7H7	Uncharacterized protein	SF1	A0A1D5Q7H7;A0A1D5QE84;H9ZD91;F6Z704;G7NCH7;H9EPF6;F6SV41;I0FUX5;F6Z6Z8;H9EPF7;A0A1D5Q0P9	A0A1D5Q7H7_MACMU Uncharacterized protein OS=Macaca mulatta OX=9544 GN=SF1 PE=4 SV=1;A0A1D5QE84_MACMU Uncharacterized protein OS=Macaca mulatta OX=9544 GN=SF1 PE=4 SV=1;H9ZD91_MACMU Splicing factor 1 isoform 1 OS=Macaca mulatta OX=9544 GN=SF1 PE=2 SV=1;F6Z7	11	1	1	1	3.9	45.251	15103000	13472000		21240000	72026000		12994000
F7B0B3	Eukaryotic translation initiation factor 3 subunit I	EIF3I	F7B0B3;A0A1D5Q0R8;H9G180;G7MI87;A0A1D5REI9	F7B0B3_MACMU Eukaryotic translation initiation factor 3 subunit I OS=Macaca mulatta OX=9544 GN=EIF3I PE=3 SV=2;A0A1D5Q0R8_MACMU Eukaryotic translation initiation factor 3 subunit I OS=Macaca mulatta OX=9544 GN=EIF3I PE=3 SV=1;H9G180_MACMU Eukaryotic transl	5	6	6	6	30.3	34.106	54752000	72366000	129500000	150180000	273070000	158870000	78122000	39323000	63259000
A0A1D5Q0S1	Uncharacterized protein	DIABLO	A0A1D5Q0S1;F7E7K8;F7E7K2;F7GHX3	A0A1D5Q0S1_MACMU Uncharacterized protein OS=Macaca mulatta OX=9544 GN=DIABLO PE=4 SV=1;F7E7K8_MACMU Uncharacterized protein OS=Macaca mulatta OX=9544 GN=DIABLO PE=4 SV=1;F7E7K2_MACMU Diablo homolog, mitochondrial isoform 1 OS=Macaca mulatta OX=9544 GN=DIAB	4	3	3	3	18.4	20.973	63702000	69954000	46317000	59256000	73062000	72038000	56123000	45218000	90690000
H9FAB5	Eukaryotic initiation factor 4A-I isoform 1 (Fragment)	EIF4A1	H9FAB5;H9YU97;A0A1D5Q0T7;G7NIG1;A0A1D5QQ19;F6XUV3;F6ZET3;F6T822	H9FAB5_MACMU Eukaryotic initiation factor 4A-I isoform 1 (Fragment) OS=Macaca mulatta OX=9544 GN=EIF4A1 PE=2 SV=1;H9YU97_MACMU Eukaryotic initiation factor 4A-I isoform 1 OS=Macaca mulatta OX=9544 GN=EIF4A1 PE=2 SV=1;A0A1D5Q0T7_MACMU Uncharacterized protei	8	21	11	21	56.5	44.761	729040000	1004600000	2365900000	2794100000	3899400000	1837100000	939880000	546500000	675670000
G7NAR7	Uncharacterized protein	EGK_05608	G7NAR7;F6YEC2;A0A1D5Q0Z8;H9FCM3	G7NAR7_MACMU Uncharacterized protein OS=Macaca mulatta OX=9544 GN=EGK_05608 PE=4 SV=1;F6YEC2_MACMU Eukaryotic translation initiation factor 5B OS=Macaca mulatta OX=9544 GN=EIF5B PE=2 SV=1;A0A1D5Q0Z8_MACMU Uncharacterized protein OS=Macaca mulatta OX=9544 G	4	2	2	2	2.5	138.87			32557000	45121000	54332000	23780000
A0A1D5Q130	Uncharacterized protein	OXA1L	A0A1D5Q130;F6X4T7;A0A1D5QAG0;F6X4U6	A0A1D5Q130_MACMU Uncharacterized protein OS=Macaca mulatta OX=9544 GN=OXA1L PE=3 SV=1;F6X4T7_MACMU Uncharacterized protein OS=Macaca mulatta OX=9544 GN=OXA1L PE=3 SV=1;A0A1D5QAG0_MACMU Uncharacterized protein OS=Macaca mulatta OX=9544 GN=OXA1L PE=3 SV=1;F6	4	2	2	2	7.7	28.082	30104000		23103000	27797000			27640000	24196000
A0A1D5RDL3	Uncharacterized protein	DDX1	A0A1D5RDL3;A0A1D5Q138;G7NBB3;F7F4N8;A0A1D5R5R5;A0A1D5REB1;A0A1D5Q1W1	A0A1D5RDL3_MACMU Uncharacterized protein OS=Macaca mulatta OX=9544 GN=DDX1 PE=4 SV=1;A0A1D5Q138_MACMU Uncharacterized protein OS=Macaca mulatta OX=9544 GN=DDX1 PE=4 SV=1;G7NBB3_MACMU Uncharacterized protein (Fragment) OS=Macaca mulatta OX=9544 GN=EGK_05066	7	7	7	7	14.9	73.974	154340000	97550000	143390000	220960000	195080000	127670000	180920000	157160000	153200000
G7NSP4	MICOS complex subunit (Fragment)	EGK_20329	G7NSP4;A0A1D5Q150;F7GPW8;F7BCD9;A0A1D5Q9V8	G7NSP4_MACMU MICOS complex subunit (Fragment) OS=Macaca mulatta OX=9544 GN=EGK_20329 PE=4 SV=1;A0A1D5Q150_MACMU MICOS complex subunit OS=Macaca mulatta OX=9544 GN=APOO PE=2 SV=1;F7GPW8_MACMU MICOS complex subunit OS=Macaca mulatta OX=9544 GN=APOO PE=4 SV=2	5	5	5	5	26.9	22.18	586240000	726430000	360720000	491430000	417590000	448950000	617220000	595480000	656640000
F7HEE6	Serine/threonine-protein phosphatase 2A activator	PTPA	F7HEE6;F7HEE4;A0A1D5Q161;H9FWM7;G7NFK4;F7HEH5;F7HP98;F7HEE1	F7HEE6_MACMU Serine/threonine-protein phosphatase 2A activator OS=Macaca mulatta OX=9544 GN=PTPA PE=3 SV=2;F7HEE4_MACMU Serine/threonine-protein phosphatase 2A activator OS=Macaca mulatta OX=9544 GN=PTPA PE=3 SV=2;A0A1D5Q161_MACMU Serine/threonine-protein	8	5	5	5	25.9	32.019	117790000	122570000	189850000	132420000	111540000	117540000	119870000	152030000	117980000
A0A1D5QVG3	UTP--glucose-1-phosphate uridylyltransferase	UGP2	A0A1D5QVG3;A0A1D5Q169;A0A1D5R7V0;A0A1D5QBS5;H9Z0R8;G7NA63;A0A1D5Q741	A0A1D5QVG3_MACMU UTP--glucose-1-phosphate uridylyltransferase OS=Macaca mulatta OX=9544 GN=UGP2 PE=3 SV=1;A0A1D5Q169_MACMU UTP--glucose-1-phosphate uridylyltransferase OS=Macaca mulatta OX=9544 GN=UGP2 PE=3 SV=1;A0A1D5R7V0_MACMU UTP--glucose-1-phosphate ur	7	11	1	1	28.7	53.556					16677000
G7NFV9	NADH dehydrogenase [ubiquinone] 1 alpha subcomplex subunit 8	NDUFA8	G7NFV9;A0A1D5Q182	G7NFV9_MACMU NADH dehydrogenase [ubiquinone] 1 alpha subcomplex subunit 8 OS=Macaca mulatta OX=9544 GN=NDUFA8 PE=2 SV=1;A0A1D5Q182_MACMU NADH dehydrogenase [ubiquinone] 1 alpha subcomplex subunit 8 OS=Macaca mulatta OX=9544 GN=NDUFA8 PE=3 SV=1	2	7	7	7	38.4	20.095	3535400000	4385100000	2374400000	3313000000	2571100000	1980600000	3423600000	3574900000	3621700000
G7MHE0	Cytidine deaminase	EGK_00332	G7MHE0;A0A1D5Q187	G7MHE0_MACMU Cytidine deaminase OS=Macaca mulatta OX=9544 GN=EGK_00332 PE=3 SV=1;A0A1D5Q187_MACMU Cytidine deaminase OS=Macaca mulatta OX=9544 GN=CDA PE=3 SV=1	2	1	1	1	14.4	16.083			29628000		30199000
F7H2Z5	Uncharacterized protein	ISCU	F7H2Z5;A0A1D5Q197;G7MXL8;A0A1D5RCM1;F7H2Z2	F7H2Z5_MACMU Uncharacterized protein OS=Macaca mulatta OX=9544 GN=ISCU PE=3 SV=2;A0A1D5Q197_MACMU Uncharacterized protein OS=Macaca mulatta OX=9544 GN=ISCU PE=3 SV=1;G7MXL8_MACMU Uncharacterized protein OS=Macaca mulatta OX=9544 GN=EGK_17558 PE=3 SV=1;A0A1	5	3	3	3	17.6	15.823	24665000	15088000	13313000	17287000	17711000			18298000	18971000
A0A1D5Q1C2	Uncharacterized protein	NOP58	A0A1D5Q1C2;F6ZQ04;A0A1D5RAC2	A0A1D5Q1C2_MACMU Uncharacterized protein OS=Macaca mulatta OX=9544 GN=NOP58 PE=4 SV=1;F6ZQ04_MACMU Nucleolar protein 58 OS=Macaca mulatta OX=9544 GN=NOP58 PE=2 SV=1;A0A1D5RAC2_MACMU Uncharacterized protein OS=Macaca mulatta OX=9544 GN=NOP58 PE=4 SV=1	3	6	6	6	20.4	52.827			15477000	20487000	75737000	5894700	5618800
A0A1D5Q1D2	60S ribosomal protein L36	LOC714620	A0A1D5Q1D2;G7MNC2;F7GTW0;F7C9X1;F6WLA4;A0A1D5Q793;G7MEK3;F7AGL7;G7MYL0;A0A1D5R7N0	A0A1D5Q1D2_MACMU 60S ribosomal protein L36 OS=Macaca mulatta OX=9544 GN=LOC714620 PE=3 SV=1;G7MNC2_MACMU 60S ribosomal protein L36 OS=Macaca mulatta OX=9544 GN=EGK_13368 PE=3 SV=1;F7GTW0_MACMU 60S ribosomal protein L36 OS=Macaca mulatta OX=9544 GN=LOC70334	10	2	2	2	20.8	11.212	123280000	149080000	278240000	337290000	489110000	186110000	192210000	96887000	117660000
H9EXI9	Seryl-tRNA synthetase, mitochondrial isoform b	SARS2	H9EXI9;G7NNJ6;A0A1D5Q1D4;A0A1D5QNU4	H9EXI9_MACMU Seryl-tRNA synthetase, mitochondrial isoform b OS=Macaca mulatta OX=9544 GN=SARS2 PE=2 SV=1;G7NNJ6_MACMU Uncharacterized protein OS=Macaca mulatta OX=9544 GN=EGK_10583 PE=4 SV=1;A0A1D5Q1D4_MACMU Uncharacterized protein OS=Macaca mulatta OX=954	4	2	2	2	5.8	58.541	18186000			22653000	18116000		19827000	25669000	23589000
G7MUV0	Uncharacterized protein	EGK_16633	G7MUV0;F7GVB3;A0A1D5Q1E3	G7MUV0_MACMU Uncharacterized protein OS=Macaca mulatta OX=9544 GN=EGK_16633 PE=4 SV=1;F7GVB3_MACMU Uncharacterized protein OS=Macaca mulatta OX=9544 GN=CMYA5 PE=4 SV=2;A0A1D5Q1E3_MACMU Uncharacterized protein OS=Macaca mulatta OX=9544 GN=CMYA5 PE=4 SV=1	3	1	1	1	0.7	310.22
F7H4K3	Uncharacterized protein	SYNPO2	F7H4K3;I0FG45;F7E206;I0FG46;G7MRV2;A0A1D5Q1G9;A0A1D5R1Q8;H9F421;H9FHB9;H9FES9	F7H4K3_MACMU Uncharacterized protein OS=Macaca mulatta OX=9544 GN=SYNPO2 PE=4 SV=2;I0FG45_MACMU Synaptopodin-2 isoform b OS=Macaca mulatta OX=9544 GN=SYNPO2 PE=2 SV=1;F7E206_MACMU Uncharacterized protein OS=Macaca mulatta OX=9544 GN=SYNPO2 PE=4 SV=2;I0FG46	10	11	11	11	12.4	114.93	93426000	16262000	210810000	95927000	74930000	168830000	133970000	109610000	105470000
F7HG66	Uncharacterized protein	TRAPPC6B	F7HG66;A0A1D5Q1H0;F7HGA3	F7HG66_MACMU Uncharacterized protein OS=Macaca mulatta OX=9544 GN=TRAPPC6B PE=4 SV=1;A0A1D5Q1H0_MACMU Trafficking protein particle complex subunit 6B isoform 1 OS=Macaca mulatta OX=9544 GN=TRAPPC6B PE=2 SV=1;F7HGA3_MACMU Uncharacterized protein OS=Macaca m	3	2	2	2	19.2	14.761	142640000	121230000		199340000	112740000			132700000	138920000
G7NAP8	Uncharacterized protein (Fragment)	EGK_05588	G7NAP8;F6ZWP5;A0A1D5Q1K4	G7NAP8_MACMU Uncharacterized protein (Fragment) OS=Macaca mulatta OX=9544 GN=EGK_05588 PE=3 SV=1;F6ZWP5_MACMU Uncharacterized protein OS=Macaca mulatta OX=9544 GN=ACTR1B PE=3 SV=2;A0A1D5Q1K4_MACMU Beta-centractin OS=Macaca mulatta OX=9544 GN=ACTR1B PE=2 SV	3	6	2	2	25.8	40.618	66068000	65081000	75243000	56852000	44909000	61949000	74169000	82174000	53812000
F6T5H8	Uncharacterized protein	DCTN1	F6T5H8;G7NAD7;I2CWJ3;A0A1D5QG94;A0A1D5Q1L0;A0A1D5R4E5;F6T5J5;A0A1D5QMV4	F6T5H8_MACMU Uncharacterized protein OS=Macaca mulatta OX=9544 GN=DCTN1 PE=4 SV=2;G7NAD7_MACMU Dynactin subunit 1 OS=Macaca mulatta OX=9544 GN=DCTN1 PE=4 SV=1;I2CWJ3_MACMU Dynactin subunit 1 isoform 3 OS=Macaca mulatta OX=9544 GN=DCTN1 PE=2 SV=1;A0A1D5QG94	8	9	9	9	10.7	126.26	66479000	64418000	55752000	18851000	88796000	141790000	96615000	65604000	100030000
A0A1D5RIW1	Uncharacterized protein	STK25	A0A1D5RIW1;F7BN05;F7E7Z9;A0A1D5R3R2;F7E7Z5;F7H3K3;H9Z0G0;G7N9E2;H9ELY8;A0A1D5Q1Q1;G7NRF5;F7H3J5;F7E7U8;A0A1D5QMP1;F7HPJ0;F7H3K1;F7E7Z0	A0A1D5RIW1_MACMU Uncharacterized protein OS=Macaca mulatta OX=9544 GN=STK25 PE=4 SV=1;F7BN05_MACMU Uncharacterized protein OS=Macaca mulatta OX=9544 GN=STK24 PE=4 SV=2;F7E7Z9_MACMU Uncharacterized protein OS=Macaca mulatta OX=9544 GN=STK26 PE=4 SV=2;A0A1D5	17	2	2	2	14.3	18.11					19814000
H9Z5A5	S-(hydroxymethyl)glutathione dehydrogenase	ADH5	H9Z5A5;F7EXL5;A0A1D5Q1R6;F7AYT8;A0A1D5Q388;A0A1D5QFA2;F7HQS2	H9Z5A5_MACMU S-(hydroxymethyl)glutathione dehydrogenase OS=Macaca mulatta OX=9544 GN=ADH5 PE=2 SV=1;F7EXL5_MACMU S-(hydroxymethyl)glutathione dehydrogenase OS=Macaca mulatta OX=9544 GN=ADH5 PE=3 SV=2;A0A1D5Q1R6_MACMU S-(hydroxymethyl)glutathione dehydrogen	7	12	12	12	33.4	39.709	828940000	763330000	769990000	754360000	680680000	701760000	800280000	934810000	645800000
A0A1D5Q1T3	LIM and senescent cell antigen-like-containing domain protein	LIMS1	A0A1D5Q1T3;F7GXN6;F7GXN8;F7GXN4;F7GXP0;F7HRP5;A0A1D5RCX6	A0A1D5Q1T3_MACMU LIM and senescent cell antigen-like-containing domain protein OS=Macaca mulatta OX=9544 GN=LIMS1 PE=4 SV=1;F7GXN6_MACMU LIM and senescent cell antigen-like-containing domain protein OS=Macaca mulatta OX=9544 GN=LIMS1 PE=4 SV=1;F7GXN8_MACMU	7	3	2	3	9.5	37.251			61393000	62375000	52672000		38490000	93272000
A0A1D5Q1V6	Phenylalanyl-tRNA synthetase alpha chain	FARSA	A0A1D5Q1V6;F6YXR8;F7FMQ7	A0A1D5Q1V6_MACMU Phenylalanyl-tRNA synthetase alpha chain OS=Macaca mulatta OX=9544 GN=FARSA PE=2 SV=1;F6YXR8_MACMU Uncharacterized protein OS=Macaca mulatta OX=9544 GN=FARSA PE=4 SV=2;F7FMQ7_MACMU Uncharacterized protein OS=Macaca mulatta OX=9544 GN=FARSA	3	6	6	6	13.8	57.496	40255000	30054000	21008000	46578000	53975000	32590000	48078000	35674000	31453000
H9ZCT4	Signal transducer and activator of transcription	STAT1	H9ZCT4;A0A1D5QW10;A0A1D5Q1W4;A0A1D5QDE4;A0A1D5R5F0;F6WE02;A0A1D5R9X3;G7N8I9;A0A1D5Q6V4;A0A1D5Q978	H9ZCT4_MACMU Signal transducer and activator of transcription OS=Macaca mulatta OX=9544 GN=STAT1 PE=2 SV=1;A0A1D5QW10_MACMU Signal transducer and activator of transcription OS=Macaca mulatta OX=9544 GN=STAT1 PE=3 SV=1;A0A1D5Q1W4_MACMU Signal transducer and	10	5	5	5	9.4	83.114			69678000		52359000	55429000	45335000		19710000
A0A1D5QIP7	Uncharacterized protein	WDR61	A0A1D5QIP7;G7MYF7;F7DDS1;A0A1D5Q206;F7DDT4	A0A1D5QIP7_MACMU Uncharacterized protein OS=Macaca mulatta OX=9544 GN=WDR61 PE=4 SV=1;G7MYF7_MACMU Meiotic recombination REC14 protein-like protein (Fragment) OS=Macaca mulatta OX=9544 GN=EGK_17720 PE=4 SV=1;F7DDS1_MACMU WD repeat-containing protein 61 OS=	5	2	2	2	15.4	32.452					68074000
F7GLL0	Uncharacterized protein		F7GLL0;H9FCJ1;A0A1D5Q209;A0A1D5QN48;F7GAF4	F7GLL0_MACMU Uncharacterized protein OS=Macaca mulatta OX=9544 PE=4 SV=2;H9FCJ1_MACMU Cytochrome c oxidase subunit 7A-related protein, mitochondrial (Fragment) OS=Macaca mulatta OX=9544 GN=COX7A2L PE=2 SV=1;A0A1D5Q209_MACMU Cytochrome c oxidase subunit 7A-	5	3	3	3	27.1	11.94		152520000	116730000	128190000	100530000	158080000		103990000	200540000
G7MRW5	Annexin (Fragment)	EGK_16058	G7MRW5;F7HM69;A0A1D5Q264;H9Z3T5;H9FTP2;A0A1D5RF44;A0A1D5QRH5	G7MRW5_MACMU Annexin (Fragment) OS=Macaca mulatta OX=9544 GN=EGK_16058 PE=3 SV=1;F7HM69_MACMU Annexin OS=Macaca mulatta OX=9544 GN=ANXA5 PE=3 SV=2;A0A1D5Q264_MACMU Annexin OS=Macaca mulatta OX=9544 GN=ANXA5 PE=3 SV=1;H9Z3T5_MACMU Annexin OS=Macaca mulatta	7	16	15	15	58.4	35.516	1540100000	2144500000	2928500000	1638900000	1778300000	1146100000	1307600000	1087400000	1481500000
H9FPQ1	Alpha-adducin isoform c	ADD1	H9FPQ1;H9FPQ2;A0A1D5R5T2;A0A1D5Q271;F7HMH8;H9FPQ0;F7HMM7;F7HMM4;Q3YAN5;A0A1D5Q3G0	H9FPQ1_MACMU Alpha-adducin isoform c OS=Macaca mulatta OX=9544 GN=ADD1 PE=2 SV=1;H9FPQ2_MACMU Alpha-adducin isoform d OS=Macaca mulatta OX=9544 GN=ADD1 PE=2 SV=1;A0A1D5R5T2_MACMU Alpha-adducin isoform d OS=Macaca mulatta OX=9544 GN=ADD1 PE=2 SV=1;A0A1D5Q27	10	5	5	5	10.5	69.972	51876000	43369000	78215000		38786000	70168000	34198000		62923000
A0A1D5Q284	Uncharacterized protein	RAB5A	A0A1D5Q284;H9EST8;G7MJX3;F7DQ40;F6USL3;G7NSF0;A0A1D5QKF9;A0A1D5Q512	A0A1D5Q284_MACMU Uncharacterized protein OS=Macaca mulatta OX=9544 GN=RAB5A PE=4 SV=1;H9EST8_MACMU Ras-related protein Rab-5A OS=Macaca mulatta OX=9544 GN=RAB5A PE=2 SV=1;G7MJX3_MACMU Uncharacterized protein OS=Macaca mulatta OX=9544 GN=EGK_12135 PE=4 SV=1	8	6	3	3	35.8	22.178	18624000	43771000	45058000	75814000	47753000	39652000	38366000	46469000	31734000
A0A1D5Q294	Uncharacterized protein	PERM1	A0A1D5Q294;A0A1D5RIB5;F6YHM9	A0A1D5Q294_MACMU Uncharacterized protein OS=Macaca mulatta OX=9544 GN=PERM1 PE=4 SV=1;A0A1D5RIB5_MACMU Uncharacterized protein OS=Macaca mulatta OX=9544 GN=PERM1 PE=4 SV=1;F6YHM9_MACMU Uncharacterized protein OS=Macaca mulatta OX=9544 GN=PERM1 PE=4 SV=2	3	4	4	4	11.2	66.023	27966000	27462000	25480000	36429000	33734000	46301000	35444000	42985000	55733000
I0FPH5	Cytochrome b5 isoform 1	CYB5A	I0FPH5;H9Z5P1;A0A1D5Q2B7;A0A1D5RCB8;H9FA70;H9F763;F7FB28;A0A1D5RHJ4	I0FPH5_MACMU Cytochrome b5 isoform 1 OS=Macaca mulatta OX=9544 GN=CYB5A PE=2 SV=1;H9Z5P1_MACMU Cytochrome b5 isoform 1 OS=Macaca mulatta OX=9544 GN=CYB5A PE=2 SV=1;A0A1D5Q2B7_MACMU Cytochrome b5 isoform 1 OS=Macaca mulatta OX=9544 GN=CYB5A PE=2 SV=1;A0A1D5	8	4	4	4	58.2	11.257	368200000	183280000	116340000	300980000	353840000	47001000	88886000	50774000	74398000
A0A1D5Q2E6	Uncharacterized protein	NES	A0A1D5Q2E6;F7H325;H9EYC1;H9FES8	A0A1D5Q2E6_MACMU Uncharacterized protein OS=Macaca mulatta OX=9544 GN=NES PE=3 SV=1;F7H325_MACMU Uncharacterized protein OS=Macaca mulatta OX=9544 GN=NES PE=3 SV=2	4	18	18	18	14.6	177.31	14134000	17172000	246680000	7413000	77163000	293500000	285550000	30841000	30822000
A0A1D5Q2E7	Uncharacterized protein	IST1	A0A1D5Q2E7;A0A1D5QXN2;F6RWV1;G7NQN8;F6YAS0	A0A1D5Q2E7_MACMU Uncharacterized protein OS=Macaca mulatta OX=9544 GN=IST1 PE=4 SV=1;A0A1D5QXN2_MACMU Uncharacterized protein OS=Macaca mulatta OX=9544 GN=IST1 PE=4 SV=1;F6RWV1_MACMU Uncharacterized protein OS=Macaca mulatta OX=9544 GN=IST1 PE=4 SV=2;G7NQN	5	1	1	1	3.9	29.359		39793000	23905000	18161000	21147000	25956000	29009000	21380000
F6WBY8	AP complex subunit beta	AP2B1	F6WBY8;F6WBB5;A0A1D5Q2F2;H9FQN1;H9FQN3;A0A1D5QHV4	F6WBY8_MACMU AP complex subunit beta OS=Macaca mulatta OX=9544 GN=AP2B1 PE=3 SV=2;F6WBB5_MACMU AP complex subunit beta OS=Macaca mulatta OX=9544 GN=AP2B1 PE=3 SV=2;A0A1D5Q2F2_MACMU AP complex subunit beta OS=Macaca mulatta OX=9544 GN=AP2B1 PE=3 SV=1;H9FQN1	6	8	4	8	16.9	101.33	105650000	102170000	167710000	105220000	158440000	118010000	117460000	66319000	103320000
A0A1D5Q2L0	Uncharacterized protein		A0A1D5Q2L0;G8F158;G7MP50;F7BCI1;I0FSA2	A0A1D5Q2L0_MACMU Uncharacterized protein OS=Macaca mulatta OX=9544 PE=4 SV=1;G8F158_MACMU Uncharacterized protein OS=Macaca mulatta OX=9544 GN=EGK_21139 PE=4 SV=1;G7MP50_MACMU HCV NS2 trans-regulated protein (Fragment) OS=Macaca mulatta OX=9544 GN=EGK_1366	5	1	1	1	18.6	13.212	63208000	43636000	62400000	87115000	52914000			47934000	94212000
H9EYN3	Small nuclear ribonucleoprotein-associated protein N (Fragment)	SNRPB	H9EYN3;A0A1D5Q2L1;H9YV84;F7FI72;G7MW70;F7FII2;F7DFL3;F6TEY4;F6TEZ3;F6TEX8	H9EYN3_MACMU Small nuclear ribonucleoprotein-associated protein N (Fragment) OS=Macaca mulatta OX=9544 GN=SNRPB PE=2 SV=1;A0A1D5Q2L1_MACMU Small nuclear ribonucleoprotein-associated protein OS=Macaca mulatta OX=9544 GN=SNRPB PE=2 SV=1;H9YV84_MACMU Small nu	10	3	3	3	13.2	23.372	27140000	62203000	73367000	69022000	114320000	42950000	35975000
H9EMH4	Voltage-dependent anion-selective channel protein 3 isoform 1	VDAC3	H9EMH4;F6WTW1;A0A1D5Q2N1;G7MZ77;A0A1D5QJS7;A0A1D5RA04	H9EMH4_MACMU Voltage-dependent anion-selective channel protein 3 isoform 1 OS=Macaca mulatta OX=9544 GN=VDAC3 PE=2 SV=1;F6WTW1_MACMU Uncharacterized protein OS=Macaca mulatta OX=9544 GN=VDAC3 PE=4 SV=2;A0A1D5Q2N1_MACMU Uncharacterized protein OS=Macaca mul	6	12	12	12	49.1	30.655	3178900000	2603600000	1966000000	2986600000	2057200000	2526100000	2715300000	2847300000	2910900000
A0A1D5R9D6	F-actin-capping protein subunit beta	CAPZB	A0A1D5R9D6;A0A1D5Q2R0;F7F3N6;G7MHC4;F7FSG7	A0A1D5R9D6_MACMU F-actin-capping protein subunit beta OS=Macaca mulatta OX=9544 GN=CAPZB PE=3 SV=1;A0A1D5Q2R0_MACMU F-actin-capping protein subunit beta OS=Macaca mulatta OX=9544 GN=CAPZB PE=3 SV=1;F7F3N6_MACMU F-actin-capping protein subunit beta OS=Macac	5	11	2	11	36.2	31.157	936270000	871690000	681920000	770990000	879760000	658160000	918850000	955880000	890130000
A0A1D5QIX9	Uncharacterized protein	PURA	A0A1D5QIX9;H9FBQ3;A0A1D5Q2R6;F6T2C6;G7MUX6	A0A1D5QIX9_MACMU Uncharacterized protein OS=Macaca mulatta OX=9544 GN=PURA PE=4 SV=1;H9FBQ3_MACMU Transcriptional activator protein Pur-alpha (Fragment) OS=Macaca mulatta OX=9544 GN=PURA PE=2 SV=1;A0A1D5Q2R6_MACMU Uncharacterized protein OS=Macaca mulatta	5	4	4	4	34	29.407	214670000	240640000	245790000	212920000	190130000	147250000	231810000	208000000	235060000
H9H2P7	Uncharacterized protein	LOC721200	H9H2P7;A0A1D5Q2R8;CON__P01030;CON__ENSEMBL:ENSBTAP00000007350;Q6XML5;Q6XML7	H9H2P7_MACMU Uncharacterized protein OS=Macaca mulatta OX=9544 GN=LOC721200 PE=4 SV=2;A0A1D5Q2R8_MACMU Uncharacterized protein OS=Macaca mulatta OX=9544 GN=LOC721200 PE=4 SV=1	6	26	1	26	21.6	187.66	876740000	830090000	1107100000	132520000	336150000	412890000	286870000	453550000	386430000
F7CTA6	Uncharacterized protein	DMAC2	F7CTA6;F7CTA0;F7CTC1;F6Z1P4;H9ZAM8;A0A1D5QAR9;G7NLJ4;A0A1D5Q2U4	F7CTA6_MACMU Uncharacterized protein OS=Macaca mulatta OX=9544 GN=DMAC2 PE=4 SV=2;F7CTA0_MACMU Uncharacterized protein OS=Macaca mulatta OX=9544 GN=DMAC2 PE=4 SV=2;F7CTC1_MACMU Uncharacterized protein OS=Macaca mulatta OX=9544 GN=DMAC2 PE=4 SV=1;F6Z1P4_MAC	8	1	1	1	10	14.131			8941300		10205000			10498000	20111000
A0A1D5R4X9	Uncharacterized protein	ITIH3	A0A1D5R4X9;A0A1D5Q311;G7ML31;F7GAT4;A0A1D5QMD3;A0A1D5RJN5;A0A1D5QFF2;A0A1D5Q3D4;CON__Q0V8M9	A0A1D5R4X9_MACMU Uncharacterized protein OS=Macaca mulatta OX=9544 GN=ITIH3 PE=4 SV=1;A0A1D5Q311_MACMU Uncharacterized protein OS=Macaca mulatta OX=9544 GN=ITIH3 PE=4 SV=1;G7ML31_MACMU Uncharacterized protein OS=Macaca mulatta OX=9544 GN=EGK_11565 PE=4 SV=	9	6	6	6	8.5	96.913	159150000	139020000	229630000	195520000	110760000		229520000	208240000	162820000
A0A1D5Q325	Ubiquinone biosynthesis monooxygenase COQ6, mitochondrial	COQ6	A0A1D5Q325;H9EVE8;A0A1D5RHW5;F6TIM8;A0A1D5Q6L0	A0A1D5Q325_MACMU Ubiquinone biosynthesis monooxygenase COQ6, mitochondrial OS=Macaca mulatta OX=9544 GN=COQ6 PE=3 SV=1;H9EVE8_MACMU Ubiquinone biosynthesis monooxygenase COQ6, mitochondrial OS=Macaca mulatta OX=9544 GN=COQ6 PE=2 SV=1;A0A1D5RHW5_MACMU Ubiqu	5	7	1	7	18	48.983	471220000	440990000	252060000	350870000	362680000	428820000	558330000	556800000	464850000
F7C2W8	Uncharacterized protein	MPI	F7C2W8;A0A1D5QAE1;A0A1D5Q335;A0A1D5Q678;G7MYC5;A0A1D5Q4L4;H9H592	F7C2W8_MACMU Uncharacterized protein OS=Macaca mulatta OX=9544 GN=MPI PE=3 SV=2;A0A1D5QAE1_MACMU Uncharacterized protein OS=Macaca mulatta OX=9544 GN=MPI PE=3 SV=1;A0A1D5Q335_MACMU Mannose-6-phosphate isomerase OS=Macaca mulatta OX=9544 GN=MPI PE=3 SV=1;A0	7	2	2	2	9.4	31.981			37346000	49919000		78714000	32117000	54197000	47382000
F7GHL1	Uncharacterized protein	FHL1	F7GHL1;A0A1D5Q361;F6TC02;F6PNX5;F6PNU1;I0FIM7	F7GHL1_MACMU Uncharacterized protein OS=Macaca mulatta OX=9544 GN=FHL1 PE=4 SV=2;A0A1D5Q361_MACMU Uncharacterized protein OS=Macaca mulatta OX=9544 GN=FHL1 PE=4 SV=1;F6TC02_MACMU Four and a half LIM domains protein 1 isoform 3 OS=Macaca mulatta OX=9544 GN=	6	11	3	11	39.5	33.55	2327500000	4393800000	4705200000	2520500000	3988300000	4564500000	5868100000	5857000000	3504200000
A0A1D5Q364	Uncharacterized protein	LOC714226	A0A1D5Q364;A0A1D5RCE8;F6WVM0;A0A1D5QR91;G7NPQ9;I0FH66;H9ERF5;A0A1D5RKI1;F6SLG7;F7G537;A0A1D5QBZ2	A0A1D5Q364_MACMU Uncharacterized protein OS=Macaca mulatta OX=9544 GN=LOC714226 PE=4 SV=1;A0A1D5RCE8_MACMU Uncharacterized protein OS=Macaca mulatta OX=9544 GN=LOC714226 PE=4 SV=1;F6WVM0_MACMU Uncharacterized protein OS=Macaca mulatta OX=9544 GN=LOC714226	11	2	2	2	4.2	84.801	10037000		6626600	9165700	10310000		9225000
F6QFL1	Glutathione peroxidase	GPX4	F6QFL1;A0A1D5Q3A0;A0A1D5QPA6;I0FR19;I2CYL1;G7NL42	F6QFL1_MACMU Glutathione peroxidase OS=Macaca mulatta OX=9544 GN=GPX4 PE=3 SV=2;A0A1D5Q3A0_MACMU Uncharacterized protein OS=Macaca mulatta OX=9544 GN=GPX4 PE=4 SV=1;A0A1D5QPA6_MACMU Glutathione peroxidase OS=Macaca mulatta OX=9544 GN=GPX4 PE=3 SV=1	6	7	7	7	44.1	19.513	157600000	157230000	196410000	244050000	158300000	208640000	282970000	218170000	134610000
A0A1D5Q3E2	Uncharacterized protein	SYN2	A0A1D5Q3E2;I2CYT9;F6TA37	A0A1D5Q3E2_MACMU Uncharacterized protein OS=Macaca mulatta OX=9544 GN=SYN2 PE=4 SV=1;I2CYT9_MACMU Synapsin-2 isoform IIb OS=Macaca mulatta OX=9544 GN=SYN2 PE=2 SV=1;F6TA37_MACMU Synapsin-2 isoform IIa OS=Macaca mulatta OX=9544 GN=SYN2 PE=2 SV=1	3	1	1	1	4.2	52.405
F7GFH4	Propionyl-CoA carboxylase beta chain, mitochondrial isoform 1	PCCB	F7GFH4;A0A1D5QZE8;A0A1D5Q3F6;F7DJ09;G7MJQ2;A0A1D5QDJ9;A0A1D5QS32;A0A1D5QQ30;A0A1D5RKD5;A0A1D5R2W8	F7GFH4_MACMU Propionyl-CoA carboxylase beta chain, mitochondrial isoform 1 OS=Macaca mulatta OX=9544 GN=PCCB PE=2 SV=2;A0A1D5QZE8_MACMU Uncharacterized protein OS=Macaca mulatta OX=9544 GN=PCCB PE=4 SV=1;A0A1D5Q3F6_MACMU Uncharacterized protein OS=Macaca m	10	17	17	17	44.5	58.188	934250000	823850000	549440000	657600000	570520000	796440000	769150000	628350000	798120000
F7HD53	Uncharacterized protein	PCCA	F7HD53;A0A1D5QH34;I2CTH4;G7NJJ6;A0A1D5Q3G9;F7GFS4;A0A1D5RH45;F7HD56;F7HD58	F7HD53_MACMU Uncharacterized protein OS=Macaca mulatta OX=9544 GN=PCCA PE=4 SV=2;A0A1D5QH34_MACMU Uncharacterized protein OS=Macaca mulatta OX=9544 GN=PCCA PE=4 SV=1;I2CTH4_MACMU Propionyl-CoA carboxylase alpha chain, mitochondrial isoform a OS=Macaca mula	9	24	24	24	38	76.936	734930000	752160000	455490000	593540000	611720000	588980000	679380000	594690000	747140000
A0A1D5Q3H2	Uncharacterized protein	CS	A0A1D5Q3H2;F6Z678;G7N7C5	A0A1D5Q3H2_MACMU Uncharacterized protein OS=Macaca mulatta OX=9544 GN=CS PE=4 SV=1;F6Z678_MACMU Uncharacterized protein OS=Macaca mulatta OX=9544 GN=CS PE=4 SV=2;G7N7C5_MACMU MIR-interacting saposin-like protein OS=Macaca mulatta OX=9544 GN=CNPY2 PE=2 SV=1	3	2	1	1	9.5	29.251			44684000	53949000		33821000
F7EIJ6	Uncharacterized protein	SARS	F7EIJ6;A0A1D5Q3H5;H9FY84	F7EIJ6_MACMU Uncharacterized protein OS=Macaca mulatta OX=9544 GN=SARS PE=4 SV=2;A0A1D5Q3H5_MACMU Uncharacterized protein OS=Macaca mulatta OX=9544 GN=SARS PE=4 SV=1;H9FY84_MACMU Seryl-tRNA synthetase, cytoplasmic OS=Macaca mulatta OX=9544 GN=SARS PE=2 SV=	3	3	3	3	7.8	54.425		27390000	35348000	25705000	36914000		24033000	17377000	22290000
F6WRP9	Uncharacterized protein	DDX3X	F6WRP9;A0A1D5RGN7;A0A1D5Q3M4;A0A1D5QFN5;I2CT83;H9YVT6;H9EM25;A0A1D5Q9J1;H9Z5U7;H9FQP2;H9Z5U8;H9FQP3;G7NT11;I0FW00;H9YVT4;I0FPL6;I0FW05;A0A1D5QVD2;A0A1D5QNR6;A0A1D5R2K3;I0FW06;B8YE00;A0A1D5QBV7;A0A1D5RB97;A0A1D5QW95	F6WRP9_MACMU Uncharacterized protein OS=Macaca mulatta OX=9544 GN=DDX3X PE=3 SV=2;A0A1D5RGN7_MACMU Uncharacterized protein OS=Macaca mulatta OX=9544 GN=DDX3X PE=3 SV=1;A0A1D5Q3M4_MACMU Uncharacterized protein OS=Macaca mulatta OX=9544 GN=DDX3X PE=3 SV=1;A0	25	12	11	11	23.3	70.867	130630000	184380000	325840000	346030000	478100000	284180000	202920000	150750000	142810000
A0A1D5Q3N7	Uncharacterized protein	LOC695279	A0A1D5Q3N7;A0A1D5RI66;G7N8V4;F7CQW3;A0A1D5RIU3;A0A1D5QI96;A0A1D5R965;A0A1D5R3L8	A0A1D5Q3N7_MACMU Uncharacterized protein OS=Macaca mulatta OX=9544 GN=LOC695279 PE=4 SV=1;A0A1D5RI66_MACMU Uncharacterized protein OS=Macaca mulatta OX=9544 GN=RPL37A PE=4 SV=1;G7N8V4_MACMU Uncharacterized protein (Fragment) OS=Macaca mulatta OX=9544 GN=EG	8	2	2	2	37.1	7.9053			20909000	36699000	32700000	23046000
H9FZ53	Tumor protein D54 isoform e	TPD52L2	H9FZ53;A0A1D5R3H4;H9FZ56;G7N411;A0A1D5Q3P0;H9ZD05;A0A1D5RA40;H9FZ55;A0A1D5QMU6;A0A1D5QD22;A0A1D5QXB8;A0A1D5QM17	H9FZ53_MACMU Tumor protein D54 isoform e OS=Macaca mulatta OX=9544 GN=TPD52L2 PE=2 SV=1;A0A1D5R3H4_MACMU Uncharacterized protein OS=Macaca mulatta OX=9544 GN=TPD52L2 PE=4 SV=1;H9FZ56_MACMU Tumor protein D54 isoform c OS=Macaca mulatta OX=9544 GN=TPD52L2 PE	12	8	8	8	51.9	22.206	197740000	188080000	144090000	186280000	234970000	218320000	167220000	149430000	164560000
G7N870	Uncharacterized protein	EGK_04484	G7N870;I0FLU6;H9ZFM2;F7FNL2;A0A1D5Q3R2;F7DZE2;F6QYH9;A0A1D5QKG5;A0A1D5QHT6;H9ZFM1;G7N2S5;F7CRL3;A0A1D5QBR7;A0A1D5RJ68;G7MNR3;F6QYH0;G7N3Y8;G7MNB8	G7N870_MACMU Uncharacterized protein OS=Macaca mulatta OX=9544 GN=EGK_04484 PE=4 SV=1;I0FLU6_MACMU ATP synthase subunit f, mitochondrial isoform 2b OS=Macaca mulatta OX=9544 GN=ATP5J2 PE=2 SV=1;H9ZFM2_MACMU ATP synthase subunit f, mitochondrial isoform 2b	18	4	4	4	70.8	5.5776	2782500000	3977700000	3329800000	4381300000	3306000000	4344700000	3329600000	3396900000	3801400000
A0A1D5QFF3	Uncharacterized protein	NOP2	A0A1D5QFF3;H9FUX2;A0A1D5Q3S2;F6ZS94;F6ZSG5;A0A1D5QF41	A0A1D5QFF3_MACMU Uncharacterized protein OS=Macaca mulatta OX=9544 GN=NOP2 PE=3 SV=1;H9FUX2_MACMU Putative ribosomal RNA methyltransferase NOP2 OS=Macaca mulatta OX=9544 GN=NOP2 PE=2 SV=1;A0A1D5Q3S2_MACMU Uncharacterized protein OS=Macaca mulatta OX=9544 G	6	2	2	2	3.7	69.659				24374000	35230000
G7MEJ0	Uncharacterized protein	EGK_01642	G7MEJ0;A0A1D5Q3T2;H9FNA3;A0A1D5R4W6;F7H4F6;A0A1D5Q516	G7MEJ0_MACMU Uncharacterized protein OS=Macaca mulatta OX=9544 GN=EGK_01642 PE=4 SV=1;A0A1D5Q3T2_MACMU Uncharacterized protein OS=Macaca mulatta OX=9544 GN=BPNT1 PE=4 SV=1;H9FNA3_MACMU 3(2),5-bisphosphate nucleotidase 1 OS=Macaca mulatta OX=9544 GN=BPNT	6	5	5	5	27.3	28.415	44633000	171930000	41758000	34446000	67453000	261200000	93156000	241400000	93201000
F6YB56	Uncharacterized protein	CARS	F6YB56;F7B1J1;A0A1D5QYM3;A0A1D5Q3X0;I0FIG3;H9F7B3;F7B1I1;A0A1D5R483;H9ZE52;G7NBM7;A0A1D5R379	F6YB56_MACMU Uncharacterized protein OS=Macaca mulatta OX=9544 GN=CARS PE=3 SV=2;F7B1J1_MACMU Uncharacterized protein OS=Macaca mulatta OX=9544 GN=CARS PE=3 SV=2;A0A1D5QYM3_MACMU Uncharacterized protein OS=Macaca mulatta OX=9544 GN=CARS PE=3 SV=1;A0A1D5Q3X	11	4	4	4	6.9	85.04	71304000		48112000	51655000	29954000	38040000		39620000	40920000
A0A1D5Q3X5	Uncharacterized protein	USP15	A0A1D5Q3X5;A0A1D5RDT8;H9EQE7;F6QY64	A0A1D5Q3X5_MACMU Uncharacterized protein OS=Macaca mulatta OX=9544 GN=USP15 PE=4 SV=1;A0A1D5RDT8_MACMU Uncharacterized protein OS=Macaca mulatta OX=9544 GN=USP15 PE=4 SV=1;H9EQE7_MACMU Ubiquitin carboxyl-terminal hydrolase OS=Macaca mulatta OX=9544 GN=USP1	4	1	1	1	8	17.402		9505600			14683000
A0A1D5Q407	Uncharacterized protein	SRI	A0A1D5Q407;H9F836;A0A1D5R0N1;A0A1D5QJX8;F7GSM8	A0A1D5Q407_MACMU Uncharacterized protein OS=Macaca mulatta OX=9544 GN=SRI PE=4 SV=1;H9F836_MACMU Sorcin isoform b (Fragment) OS=Macaca mulatta OX=9544 GN=SRI PE=2 SV=1;A0A1D5R0N1_MACMU Uncharacterized protein OS=Macaca mulatta OX=9544 GN=SRI PE=4 SV=1;A0A1	5	3	3	3	19.4	17.632	90254000	59118000	92823000	106880000	132410000	96570000	78757000	44925000	72491000
F6QLL3	Uncharacterized protein	EIF3D	F6QLL3;A0A1D5Q459;G7N3R0;F7ENA9	F6QLL3_MACMU Uncharacterized protein OS=Macaca mulatta OX=9544 GN=EIF3D PE=4 SV=2;A0A1D5Q459_MACMU Eukaryotic translation initiation factor 3 subunit D OS=Macaca mulatta OX=9544 GN=EIF3D PE=2 SV=1;G7N3R0_MACMU Eukaryotic translation initiation factor 3 sub	4	4	4	4	11.1	46.473	67935000	71269000	88125000	110670000	175990000	69361000	116570000	53716000	66260000
A0A1D5QM87	Uncharacterized protein	LONRF1	A0A1D5QM87;A0A1D5Q462;F6YTW7	A0A1D5QM87_MACMU Uncharacterized protein OS=Macaca mulatta OX=9544 GN=LONRF1 PE=4 SV=1;A0A1D5Q462_MACMU Uncharacterized protein OS=Macaca mulatta OX=9544 GN=LOC703145 PE=4 SV=1;F6YTW7_MACMU Uncharacterized protein OS=Macaca mulatta OX=9544 GN=LONRF1 PE=4 S	3	1	1	1	3.6	42.242
A0A1D5QE44	Tetraspanin	CD81	A0A1D5QE44;G7NBM1;A0A1D5QWY8;A0A1D5Q473;F6WY45;A0A1D5QLQ5;A0A1D5R5M7	A0A1D5QE44_MACMU Tetraspanin OS=Macaca mulatta OX=9544 GN=CD81 PE=3 SV=1;G7NBM1_MACMU Tetraspanin (Fragment) OS=Macaca mulatta OX=9544 GN=EGK_05870 PE=3 SV=1;A0A1D5QWY8_MACMU Tetraspanin OS=Macaca mulatta OX=9544 GN=CD81 PE=3 SV=1;A0A1D5Q473_MACMU Tetraspa	7	2	2	2	17.9	21.555	124720000	127610000	232860000	111160000	119720000	103280000	159570000	128410000	203520000
G7NJN5	Lysosome-associated membrane glycoprotein 1	EGK_09480	G7NJN5;A0A1D5Q490;I0FRN0;H9Z8T9;F6Y0V7	G7NJN5_MACMU Lysosome-associated membrane glycoprotein 1 OS=Macaca mulatta OX=9544 GN=EGK_09480 PE=3 SV=1;A0A1D5Q490_MACMU Uncharacterized protein OS=Macaca mulatta OX=9544 GN=LAMP1 PE=3 SV=1;I0FRN0_MACMU Lysosome-associated membrane glycoprotein 1 OS=Maca	5	3	3	3	7.2	40.624	90818000	88094000	112380000	73851000	79812000	90170000	110780000		77815000
I0FNI0	Acidic leucine-rich nuclear phosphoprotein 32 family member B	ANP32B	I0FNI0;A0A1D5Q4B1;F6V8C0;A0A1D5QJA4	I0FNI0_MACMU Acidic leucine-rich nuclear phosphoprotein 32 family member B OS=Macaca mulatta OX=9544 GN=ANP32B PE=2 SV=1;A0A1D5Q4B1_MACMU Acidic leucine-rich nuclear phosphoprotein 32 family member B OS=Macaca mulatta OX=9544 GN=ANP32B PE=2 SV=1;F6V8C0_MAC	4	5	3	3	24.4	28.672		24620000	60707000	74880000	57657000	38694000	11049000	26776000
G7MNY9	NADPH--cytochrome P450 reductase	POR	G7MNY9;A0A1D5Q4C0;F7GP55	G7MNY9_MACMU NADPH--cytochrome P450 reductase OS=Macaca mulatta OX=9544 GN=POR PE=3 SV=1;A0A1D5Q4C0_MACMU NADPH--cytochrome P450 reductase OS=Macaca mulatta OX=9544 GN=POR PE=2 SV=1;F7GP55_MACMU NADPH--cytochrome P450 reductase OS=Macaca mulatta OX=9544 GN	3	11	11	11	22.2	77.015	100440000	33427000	132650000	83107000	310510000	108790000	24318000	167090000
G7MX93	Fibrillin-1	EGK_17472	G7MX93;A0A1D5Q4D3;I0FJ04;F6YVP3;F7G3X5;F6YWD1;H9FJJ1;H9F9I9;A0A1D5RGZ6;A0A1D5RIN1;A0A1D5R3Z9;G7MTW8;A0A1D5R3X8;F7GCA1;F7GC88;A0A1D5RKY0	G7MX93_MACMU Fibrillin-1 OS=Macaca mulatta OX=9544 GN=EGK_17472 PE=4 SV=1;A0A1D5Q4D3_MACMU Fibrillin-1 OS=Macaca mulatta OX=9544 GN=FBN1 PE=2 SV=1;I0FJ04_MACMU Fibrillin-1 OS=Macaca mulatta OX=9544 GN=FBN1 PE=2 SV=1;F6YVP3_MACMU Uncharacterized protein OS=	16	36	36	36	14.9	312.38	1379900000	2607500000	915630000	1468600000	976700000	1612400000	1520800000	1438400000	1341300000
A0A1D5Q4D5	RNA cytidine acetyltransferase	NAT10	A0A1D5Q4D5;F7FA29;H9FWL8;A0A1D5Q9X7	A0A1D5Q4D5_MACMU RNA cytidine acetyltransferase OS=Macaca mulatta OX=9544 GN=NAT10 PE=3 SV=1;F7FA29_MACMU RNA cytidine acetyltransferase OS=Macaca mulatta OX=9544 GN=NAT10 PE=3 SV=2;H9FWL8_MACMU RNA cytidine acetyltransferase OS=Macaca mulatta OX=9544 GN=N	4	1	1	1	1.6	102.77			11565000	6612900	16499000
A0A1D5RKP0	Serine hydroxymethyltransferase	SHMT2	A0A1D5RKP0;F7DED8;H9ES01;G7N7F2;A0A1D5Q4D6;A0A1D5Q1X8;A0A1D5R0G0;F7FVA6;G7NJ32;F6WIE8	A0A1D5RKP0_MACMU Serine hydroxymethyltransferase OS=Macaca mulatta OX=9544 GN=SHMT2 PE=3 SV=1;F7DED8_MACMU Serine hydroxymethyltransferase OS=Macaca mulatta OX=9544 GN=SHMT2 PE=3 SV=2;H9ES01_MACMU Serine hydroxymethyltransferase OS=Macaca mulatta OX=9544 G	10	6	6	6	16.9	55.308	40759000		127910000	94859000	194600000	51237000
H9FZR8	FYVE and coiled-coil domain-containing protein 1	FYCO1	H9FZR8;G7MIU3;F7HFT2;A0A1D5Q4E7	H9FZR8_MACMU FYVE and coiled-coil domain-containing protein 1 OS=Macaca mulatta OX=9544 GN=FYCO1 PE=2 SV=1;G7MIU3_MACMU Uncharacterized protein OS=Macaca mulatta OX=9544 GN=EGK_11716 PE=4 SV=1;F7HFT2_MACMU Uncharacterized protein OS=Macaca mulatta OX=9544	4	1	1	1	0.9	166.78
F6TW01	Uncharacterized protein	VPS4A	F6TW01;G7NQL8;A0A1D5QVE3;A0A1D5QAY1;A0A1D5R8T0;A0A1D5QUC8;A0A1D5Q4G7	F6TW01_MACMU Uncharacterized protein OS=Macaca mulatta OX=9544 GN=VPS4A PE=3 SV=2;G7NQL8_MACMU VPS4-1 (Fragment) OS=Macaca mulatta OX=9544 GN=EGK_12936 PE=3 SV=1;A0A1D5QVE3_MACMU Uncharacterized protein OS=Macaca mulatta OX=9544 GN=VPS4A PE=3 SV=1;A0A1D5QA	7	2	2	2	11.9	48.038	96557000	71116000	101870000	68826000	88043000		135330000	68991000	131220000
H9F6L1	Thioredoxin-dependent peroxide reductase, mitochondrial isoform a (Fragment)	PRDX3	H9F6L1;F7H945;F7H938;A0A1D5Q4H6;G7N189;A0A1D5QMK6	H9F6L1_MACMU Thioredoxin-dependent peroxide reductase, mitochondrial isoform a (Fragment) OS=Macaca mulatta OX=9544 GN=PRDX3 PE=2 SV=1;F7H945_MACMU Uncharacterized protein OS=Macaca mulatta OX=9544 GN=PRDX3 PE=4 SV=2;F7H938_MACMU Uncharacterized protein OS	6	9	9	9	55.3	22.052	5919000000	5786000000	4084500000	5356600000	6280400000	5554600000	5130400000	6144800000	6668400000
A0A1D5Q4I5	Chloride intracellular channel protein	CLIC5	A0A1D5Q4I5;F7E2U2;F7GTS5	A0A1D5Q4I5_MACMU Chloride intracellular channel protein OS=Macaca mulatta OX=9544 GN=CLIC5 PE=3 SV=1;F7E2U2_MACMU Chloride intracellular channel protein OS=Macaca mulatta OX=9544 GN=CLIC5 PE=3 SV=1;F7GTS5_MACMU Chloride intracellular channel protein OS=Mac	3	3	3	3	18.7	28.152	46767000	51890000	39873000	62693000	50566000	58783000	81935000	74110000	52894000
A0A1D5R0G2	Uncharacterized protein	COL12A1	A0A1D5R0G2;F6SIX4;A0A1D5QTM6;A0A1D5Q4K0	A0A1D5R0G2_MACMU Uncharacterized protein OS=Macaca mulatta OX=9544 GN=COL12A1 PE=4 SV=1;F6SIX4_MACMU Uncharacterized protein OS=Macaca mulatta OX=9544 GN=COL12A1 PE=4 SV=2;A0A1D5QTM6_MACMU Uncharacterized protein OS=Macaca mulatta OX=9544 GN=COL12A1 PE=4 S	4	4	4	4	3.5	203.18			69376000		45162000
H9Z445	THO complex subunit 4	ALYREF	H9Z445;F6S9B3;A0A1D5Q4N1;G7NHA7	H9Z445_MACMU THO complex subunit 4 OS=Macaca mulatta OX=9544 GN=ALYREF PE=2 SV=1;F6S9B3_MACMU THO complex subunit 4 OS=Macaca mulatta OX=9544 GN=ALYREF PE=2 SV=1;A0A1D5Q4N1_MACMU Uncharacterized protein OS=Macaca mulatta OX=9544 GN=ALYREF PE=4 SV=1;G7NHA7_	4	5	2	5	34.5	27.26	45824000	65258000	123530000	125030000	265520000	74096000			75555000
A0A1D5RJS7	Acylphosphatase		A0A1D5RJS7;A0A1D5Q4P4	A0A1D5RJS7_MACMU Acylphosphatase OS=Macaca mulatta OX=9544 PE=3 SV=1;A0A1D5Q4P4_MACMU Acylphosphatase OS=Macaca mulatta OX=9544 PE=3 SV=1	2	3	2	3	17.5	10.253	97140000	104030000	84898000	82038000	86284000	131810000	64118000	154180000	91462000
A0A1D5Q4Q7	Uncharacterized protein	BUB3	A0A1D5Q4Q7;H9EMB5;A0A1D5QA37;F7DSC1;A0A1D5R5T4;F6SPX2	A0A1D5Q4Q7_MACMU Uncharacterized protein OS=Macaca mulatta OX=9544 GN=BUB3 PE=4 SV=1;H9EMB5_MACMU Mitotic checkpoint protein BUB3 isoform b OS=Macaca mulatta OX=9544 GN=BUB3 PE=2 SV=1;A0A1D5QA37_MACMU Mitotic checkpoint protein BUB3 isoform a OS=Macaca mul	6	3	3	3	8.3	36.766	28825000		52554000	46255000	104530000	48869000
A0A1D5Q4S6	Uncharacterized protein	GANAB	A0A1D5Q4S6;F7FGC5;G7NCT6;F7FGD1;A0A1D5Q745;A0A1D5RBE6;A0A1D5QW26;A0A1D5Q9F1	A0A1D5Q4S6_MACMU Uncharacterized protein OS=Macaca mulatta OX=9544 GN=GANAB PE=3 SV=1;F7FGC5_MACMU Uncharacterized protein OS=Macaca mulatta OX=9544 GN=GANAB PE=3 SV=2;G7NCT6_MACMU Neutral alpha-glucosidase AB isoform 3 OS=Macaca mulatta OX=9544 GN=GANAB P	8	18	2	18	25.4	98.743	376220000	311260000	478100000	403840000	490540000	320470000	286380000	318910000	303590000
A0A1D5Q506	Signal recognition particle 54 kDa protein	SRP54	A0A1D5Q506;F6WVU7	A0A1D5Q506_MACMU Signal recognition particle 54 kDa protein OS=Macaca mulatta OX=9544 GN=SRP54 PE=3 SV=1;F6WVU7_MACMU Signal recognition particle 54 kDa protein OS=Macaca mulatta OX=9544 GN=FAM177A1 PE=2 SV=1	2	1	1	1	2.4	50.369					13386000
A0A1D5Q513	Uncharacterized protein	UBE2K	A0A1D5Q513;H9FAT9;A0A1D5RIM7;H9FAT8;F6UEX6;F6U8R5	A0A1D5Q513_MACMU Uncharacterized protein OS=Macaca mulatta OX=9544 GN=UBE2K PE=4 SV=1;H9FAT9_MACMU Ubiquitin-conjugating enzyme E2 K isoform 2 (Fragment) OS=Macaca mulatta OX=9544 GN=UBE2K PE=2 SV=1;A0A1D5RIM7_MACMU Uncharacterized protein OS=Macaca mulatt	6	2	2	2	18	15.81					33353000	34758000
A0A1D5Q518	CAAX prenyl protease	ZMPSTE24	A0A1D5Q518;F6UEH3	A0A1D5Q518_MACMU CAAX prenyl protease OS=Macaca mulatta OX=9544 GN=ZMPSTE24 PE=2 SV=1;F6UEH3_MACMU CAAX prenyl protease OS=Macaca mulatta OX=9544 GN=ZMPSTE24 PE=3 SV=2	2	2	2	2	4	54.891		15636000	24174000	21888000	33370000	38623000	20855000	21111000
F7HMS8	Uncharacterized protein	CCDC58	F7HMS8;H9FA26;G7MKJ5;A0A1D5Q547;A0A1D5R926	F7HMS8_MACMU Uncharacterized protein OS=Macaca mulatta OX=9544 GN=CCDC58 PE=4 SV=2;H9FA26_MACMU Coiled-coil domain-containing protein 58 (Fragment) OS=Macaca mulatta OX=9544 GN=CCDC58 PE=2 SV=1;G7MKJ5_MACMU Uncharacterized protein OS=Macaca mulatta OX=9544	5	2	2	2	20.2	15.168	61953000	62119000	49261000	83356000	76064000	116390000	50866000	38934000	50590000
H9F0Z7	Proteasomal ubiquitin receptor ADRM1 (Fragment)	ADRM1	H9F0Z7;F7F0I5;A0A1D5Q562;F7FSU5	H9F0Z7_MACMU Proteasomal ubiquitin receptor ADRM1 (Fragment) OS=Macaca mulatta OX=9544 GN=ADRM1 PE=2 SV=1;F7F0I5_MACMU Uncharacterized protein OS=Macaca mulatta OX=9544 GN=ADRM1 PE=4 SV=2;A0A1D5Q562_MACMU Adhesion-regulating molecule 1 OS=Macaca mulatta OX	4	2	2	2	6.2	39.815		20749000	33275000	33637000	44951000		18788000	21498000	23128000
F7HPY4	Uncharacterized protein	LAMB1	F7HPY4;G7MM43;A0A1D5Q585;A0A1D5QPB4;A0A1D5R9X2;I0FRM7;H9FJJ6;H9F8W5;H9FJ91	F7HPY4_MACMU Uncharacterized protein OS=Macaca mulatta OX=9544 GN=LAMB1 PE=4 SV=1;G7MM43_MACMU Uncharacterized protein OS=Macaca mulatta OX=9544 GN=EGK_14036 PE=4 SV=1;A0A1D5Q585_MACMU Uncharacterized protein OS=Macaca mulatta OX=9544 GN=LAMB1 PE=4 SV=1;A0	9	36	36	36	23.2	197.72	2283900000	2184800000	1538800000	1856200000	1185300000	2111400000	2498900000	2624200000	2003700000
A0A1D5Q5B3	Histone H2A	H2AFX	A0A1D5Q5B3;G7MQV3;H9F1C5;A0A1D5RFL1;REV__F7FRB9;REV__H9FIC7;REV__F6YY62;REV__F6YY37;REV__F6YY46;REV__G7MQM4;REV__F7FRC8;REV__H9F7T3;REV__F7FRA9	A0A1D5Q5B3_MACMU Histone H2A OS=Macaca mulatta OX=9544 GN=H2AFX PE=2 SV=1;G7MQV3_MACMU Histone H2A OS=Macaca mulatta OX=9544 GN=HIST1H2AA PE=3 SV=1;H9F1C5_MACMU Histone H2A (Fragment) OS=Macaca mulatta OX=9544 GN=H2AFX PE=2 SV=1	13	6	0	1	58	15.144
A0A1D5Q5B5	Uncharacterized protein	ISOC2	A0A1D5Q5B5;I2CUS3;F7DWN8	A0A1D5Q5B5_MACMU Uncharacterized protein OS=Macaca mulatta OX=9544 GN=ISOC2 PE=4 SV=1;I2CUS3_MACMU Isochorismatase domain-containing protein 2, mitochondrial isoform 1 OS=Macaca mulatta OX=9544 GN=ISOC2 PE=2 SV=1;F7DWN8_MACMU Uncharacterized protein OS=Mac	3	3	1	3	45.2	14.815	59920000	61162000	124910000	50193000	134640000	77244000	63526000	49424000	63747000
F6R9G6	Uncharacterized protein	EPB41L3	F6R9G6;A0A1D5REV2;A0A1D5QUZ1;A0A1D5Q5C5;A0A1D5QLV0;G7NKD7;A0A1D5RHX9	F6R9G6_MACMU Uncharacterized protein OS=Macaca mulatta OX=9544 GN=EPB41L3 PE=4 SV=1;A0A1D5REV2_MACMU Uncharacterized protein OS=Macaca mulatta OX=9544 GN=EPB41L3 PE=4 SV=1;A0A1D5QUZ1_MACMU Uncharacterized protein OS=Macaca mulatta OX=9544 GN=EPB41L3 PE=4 S	7	7	6	6	11.3	96.455	33981000	18251000		28981000	14180000	28049000	42620000
A0A1D5R5A1	Uncharacterized protein	PUDP	A0A1D5R5A1;G7NKM5;G7NS25;A0A1D5Q5D5;F7H6N8;A0A1D5R648	A0A1D5R5A1_MACMU Uncharacterized protein OS=Macaca mulatta OX=9544 GN=PUDP PE=4 SV=1;G7NKM5_MACMU Uncharacterized protein OS=Macaca mulatta OX=9544 GN=EGK_09646 PE=4 SV=1;G7NS25_MACMU Uncharacterized protein OS=Macaca mulatta OX=9544 GN=EGK_20247 PE=4 SV=1	6	2	2	2	11.8	22.934				18847000		24659000	29658000	25953000	29917000
I0FPG4	Iron-sulfur cluster co-chaperone protein HscB, mitochondrial	HSCB	I0FPG4;F6VJ72;H9F4A7;I2CV96;G7N3I2;A0A1D5Q5I4	I0FPG4_MACMU Iron-sulfur cluster co-chaperone protein HscB, mitochondrial OS=Macaca mulatta OX=9544 GN=HSCB PE=2 SV=1;F6VJ72_MACMU Uncharacterized protein OS=Macaca mulatta OX=9544 GN=HSCB PE=4 SV=2;H9F4A7_MACMU Iron-sulfur cluster co-chaperone protein Hsc	6	2	2	2	12.6	16.55	19716000		21017000	20250000		15340000		15423000
H9FPH1	Protein DJ-1	PARK7	H9FPH1;A0A1D5Q5I8;F7CMK7;G7MGR7;A0A1D5QKT0;A0A1D5Q230;A0A1D5QN21;A0A1D5QK14	H9FPH1_MACMU Protein DJ-1 OS=Macaca mulatta OX=9544 GN=PARK7 PE=2 SV=1;A0A1D5Q5I8_MACMU Uncharacterized protein OS=Macaca mulatta OX=9544 GN=PARK7 PE=4 SV=1;F7CMK7_MACMU Uncharacterized protein OS=Macaca mulatta OX=9544 GN=PARK7 PE=4 SV=2;G7MGR7_MACMU Unch	8	11	11	11	70.9	19.891	2174900000	2129300000	1776000000	2232700000	2011100000	1993300000	1403500000	2205100000	1586800000
A0A1D5Q5J5	Uncharacterized protein	LYPLA1	A0A1D5Q5J5;A0A1D5RAC4;F6Z819;A0A1D5QDA8;F6SPC5;A0A1D5R1Q6	A0A1D5Q5J5_MACMU Uncharacterized protein OS=Macaca mulatta OX=9544 GN=LYPLA1 PE=4 SV=1;A0A1D5RAC4_MACMU Uncharacterized protein OS=Macaca mulatta OX=9544 GN=LYPLA1 PE=4 SV=1;F6Z819_MACMU Acyl-protein thioesterase 1 OS=Macaca mulatta OX=9544 GN=LYPLA1 PE=2	6	3	3	3	15	22.889	352610000	390760000	285290000	275250000	287190000	312740000	297330000	469020000	433900000
A0A1D5Q5J8	Methylmalonyl-CoA mutase, mitochondrial	MMUT	A0A1D5Q5J8;G7MPJ0;H9FUQ7;F7HGZ4	A0A1D5Q5J8_MACMU Methylmalonyl-CoA mutase, mitochondrial OS=Macaca mulatta OX=9544 GN=MMUT PE=2 SV=1;G7MPJ0_MACMU Uncharacterized protein OS=Macaca mulatta OX=9544 GN=EGK_14986 PE=4 SV=1;H9FUQ7_MACMU Methylmalonyl-CoA mutase, mitochondrial OS=Macaca mulatt	4	14	14	14	27.3	83.095	521780000	587400000	304590000	543080000	284130000	484850000	355930000	406970000	464160000
A0A1D5Q5K4	Uncharacterized protein	ATP5F1B	A0A1D5Q5K4	A0A1D5Q5K4_MACMU Uncharacterized protein OS=Macaca mulatta OX=9544 GN=ATP5F1B PE=4 SV=1	1	12	2	2	55.6	28.279	94725000	47213000		55837000	42996000	87070000	69158000	93126000	106390000
G7N699	Uncharacterized protein (Fragment)	EGK_04326	G7N699;H9EPG4;A0A1D5Q5K9	G7N699_MACMU Uncharacterized protein (Fragment) OS=Macaca mulatta OX=9544 GN=EGK_04326 PE=3 SV=1;H9EPG4_MACMU Transmembrane emp24 domain-containing protein 2 OS=Macaca mulatta OX=9544 GN=TMED2 PE=2 SV=1;A0A1D5Q5K9_MACMU Uncharacterized protein OS=Macaca mu	3	2	2	2	17.5	16.567	32371000	41900000	25418000		43804000		45009000	24141000
A0A1D5Q5M8	Uncharacterized protein	AKAP1	A0A1D5Q5M8;F7E7Y4;I2CXP7;G7NHQ6	A0A1D5Q5M8_MACMU Uncharacterized protein OS=Macaca mulatta OX=9544 GN=AKAP1 PE=4 SV=1;F7E7Y4_MACMU Uncharacterized protein OS=Macaca mulatta OX=9544 GN=AKAP1 PE=4 SV=2;I2CXP7_MACMU A-kinase anchor protein 1, mitochondrial OS=Macaca mulatta OX=9544 GN=AKAP1	4	1	1	1	1.7	63.108									35714000
A0A1D5Q5N4	Uncharacterized protein	RPL22	A0A1D5Q5N4;G7MGJ1;A0A1D5QBP8;F7HSE7;F7H615	A0A1D5Q5N4_MACMU Uncharacterized protein OS=Macaca mulatta OX=9544 GN=RPL22 PE=4 SV=1;G7MGJ1_MACMU Uncharacterized protein (Fragment) OS=Macaca mulatta OX=9544 GN=EGK_00159 PE=4 SV=1;A0A1D5QBP8_MACMU Uncharacterized protein OS=Macaca mulatta OX=9544 GN=RPL	5	1	1	1	20.8	5.7455	114760000	138280000	188790000	224450000	494680000	154890000	153310000	95969000	119210000
I0FQQ7	Polymerase delta-interacting protein 2	POLDIP2	I0FQQ7;A0A1D5Q5R0;F6STI9	I0FQQ7_MACMU Polymerase delta-interacting protein 2 OS=Macaca mulatta OX=9544 GN=POLDIP2 PE=2 SV=1;A0A1D5Q5R0_MACMU Uncharacterized protein OS=Macaca mulatta OX=9544 GN=POLDIP2 PE=4 SV=1;F6STI9_MACMU Uncharacterized protein OS=Macaca mulatta OX=9544 GN=POL	3	3	3	3	9.2	42.045				16646000				22443000
F7GT21	Uncharacterized protein	ECPAS	F7GT21;F7GT17;F7HE01;A0A1D5Q5T6;A0A1D5RAF4	F7GT21_MACMU Uncharacterized protein OS=Macaca mulatta OX=9544 GN=ECPAS PE=4 SV=2;F7GT17_MACMU Uncharacterized protein OS=Macaca mulatta OX=9544 GN=ECPAS PE=4 SV=2;F7HE01_MACMU Uncharacterized protein OS=Macaca mulatta OX=9544 GN=ECPAS PE=4 SV=2;A0A1D5Q5T6	5	3	3	3	1.9	203.56	20532000		46074000	35290000	28859000	29755000		16724000
A0A1D5Q5U2	Uncharacterized protein	RBM14	A0A1D5Q5U2;H9Z4B9;G7NC47	A0A1D5Q5U2_MACMU Uncharacterized protein OS=Macaca mulatta OX=9544 GN=RBM14 PE=4 SV=1;H9Z4B9_MACMU RNA-binding protein 14 isoform 1 OS=Macaca mulatta OX=9544 GN=RBM14 PE=2 SV=1;G7NC47_MACMU RNA-binding motif protein 14 OS=Macaca mulatta OX=9544 GN=RBM14 PE	3	4	4	4	9.9	66.273			43427000	37302000	102330000	35420000
A0A1D5Q5W0	Uncharacterized protein	TNNI1	A0A1D5Q5W0;G7N9X4;A0A1D5RBL5;A0A1D5QZG3;A0A1D5RKB4;I2CW22;A0A1D5QBP4;A0A1D5Q7I3	A0A1D5Q5W0_MACMU Uncharacterized protein OS=Macaca mulatta OX=9544 GN=TNNI1 PE=4 SV=1;G7N9X4_MACMU Uncharacterized protein OS=Macaca mulatta OX=9544 GN=EGK_05261 PE=4 SV=1;A0A1D5RBL5_MACMU Uncharacterized protein OS=Macaca mulatta OX=9544 GN=TNNI1 PE=4 SV=	8	2	2	2	11.5	15.337			185630000
H9F5Y8	Methylmalonyl-CoA epimerase, mitochondrial (Fragment)	MCEE	H9F5Y8;A0A1D5Q5W4;G7NAA9;F6VQY5;A0A1D5Q329	H9F5Y8_MACMU Methylmalonyl-CoA epimerase, mitochondrial (Fragment) OS=Macaca mulatta OX=9544 GN=MCEE PE=2 SV=1;A0A1D5Q5W4_MACMU Uncharacterized protein OS=Macaca mulatta OX=9544 GN=MCEE PE=4 SV=1;G7NAA9_MACMU Uncharacterized protein OS=Macaca mulatta OX=95	5	2	2	2	11.2	17.282	42350000	25118000	26906000	29333000	25444000	26358000	29364000	31561000	23831000
A0A1D5Q5X7	Uncharacterized protein		A0A1D5Q5X7;G8F146;F6YSK1;G8F1V7;F7H5Y1;G7NAL6;G8F1P1;G7NAZ5;G7NAZ2;G7NAM0;G8F1V8;G8F1H8;A0A1D5R3E3;A0A1D5QFU0;F6UNH0;F7HD17;H9H5T8;F7GTM2;A0A1D5RH58;A0A1D5QFU5;F6RVX2;H9H569;A0A1D5RB30	A0A1D5Q5X7_MACMU Uncharacterized protein OS=Macaca mulatta OX=9544 PE=4 SV=1;G8F146_MACMU Uncharacterized protein (Fragment) OS=Macaca mulatta OX=9544 GN=EGK_21247 PE=4 SV=1;F6YSK1_MACMU Uncharacterized protein OS=Macaca mulatta OX=9544 PE=4 SV=2;G8F1V7_MA	23	2	2	2	23.2	15.672	141380000	95691000	118200000	89402000	61672000	47549000		83387000
H9ESG6	Malic enzyme	ME2	H9ESG6;A0A1D5Q5Y2;F6RIZ9	H9ESG6_MACMU Malic enzyme OS=Macaca mulatta OX=9544 GN=ME2 PE=2 SV=1;A0A1D5Q5Y2_MACMU Malic enzyme OS=Macaca mulatta OX=9544 GN=ME2 PE=3 SV=1;F6RIZ9_MACMU Malic enzyme OS=Macaca mulatta OX=9544 GN=ME2 PE=3 SV=2	3	19	18	19	44.9	65.454	2137000000	1365500000	742870000	1827300000	1193900000	1384200000	1126500000	1267000000	1742100000
A0A1D5Q5Z9	Uncharacterized protein	PPP1R2	A0A1D5Q5Z9;H9FWF8;F6T1H7	A0A1D5Q5Z9_MACMU Uncharacterized protein OS=Macaca mulatta OX=9544 GN=PPP1R2 PE=4 SV=1;H9FWF8_MACMU Protein phosphatase inhibitor 2 OS=Macaca mulatta OX=9544 GN=PPP1R2 PE=2 SV=1;F6T1H7_MACMU Protein phosphatase inhibitor 2 OS=Macaca mulatta OX=9544 GN=PPP1	3	3	3	3	58.8	8.954		23834000	24799000	35472000	50351000	34522000
F6Q6N6	Uncharacterized protein	PDP1	F6Q6N6;A0A1D5RD44;F6RX47;A0A1D5Q602;G7MZS0;H9FW49	F6Q6N6_MACMU Uncharacterized protein OS=Macaca mulatta OX=9544 GN=PDP1 PE=3 SV=2;A0A1D5RD44_MACMU Uncharacterized protein OS=Macaca mulatta OX=9544 GN=PDP1 PE=3 SV=1;F6RX47_MACMU Uncharacterized protein OS=Macaca mulatta OX=9544 GN=PDP1 PE=3 SV=2;A0A1D5Q60	6	7	7	7	19	61.049	215780000	206520000	137470000	138300000	125010000	131460000	243120000	183230000	271140000
F7FXE1	UDP-glucose 6-dehydrogenase	UGDH	F7FXE1;A0A1D5Q620	F7FXE1_MACMU UDP-glucose 6-dehydrogenase OS=Macaca mulatta OX=9544 GN=UGDH PE=3 SV=2;A0A1D5Q620_MACMU UDP-glucose 6-dehydrogenase OS=Macaca mulatta OX=9544 GN=UGDH PE=2 SV=1	2	6	6	6	16.2	47.656			83261000	67277000	112720000	48580000
A0A1D5RHF6	Uncharacterized protein	PRMT1	A0A1D5RHF6;F6VMS3;A0A1D5Q622;I2CUI2;A0A1D5RAB9;H9FAV1;G7NLP8;A0A1D5QQP8;F7ALU2;H9FX83;F7ALQ3;A0A1D5RB22;G7N5J7	A0A1D5RHF6_MACMU Uncharacterized protein OS=Macaca mulatta OX=9544 GN=PRMT1 PE=3 SV=1;F6VMS3_MACMU Uncharacterized protein OS=Macaca mulatta OX=9544 GN=PRMT1 PE=3 SV=2;A0A1D5Q622_MACMU Uncharacterized protein OS=Macaca mulatta OX=9544 GN=PRMT1 PE=3 SV=1;I2	13	7	7	7	21.2	37.709	167840000	44015000	87817000	80407000	299410000	41544000	53927000	81367000	94032000
A0A1D5Q679	Uncharacterized protein	AHCYL1	A0A1D5Q679;H9F9W6;A0A1D5Q8B2;G7MIF1;H9Z4K5;F7GIN0;G7MMC3;A0A1D5RHY9;A0A1D5QET6;F6TAH9;H9F9K2;F7H6W6;H9Z708;F7H6W0	A0A1D5Q679_MACMU Uncharacterized protein OS=Macaca mulatta OX=9544 GN=AHCYL1 PE=4 SV=1;H9F9W6_MACMU Adenosylhomocysteinase (Fragment) OS=Macaca mulatta OX=9544 GN=AHCYL1 PE=2 SV=1;A0A1D5Q8B2_MACMU Adenosylhomocysteinase OS=Macaca mulatta OX=9544 GN=AHCYL1	14	3	3	3	10.5	30.335		11453000			33159000		10494000	7893800
I0FM91	KN motif and ankyrin repeat domain-containing protein 2 isoform 2	KANK2	I0FM91;A0A1D5Q686;G7NL20;F7E663;H9F2X7;H9F189	I0FM91_MACMU KN motif and ankyrin repeat domain-containing protein 2 isoform 2 OS=Macaca mulatta OX=9544 GN=KANK2 PE=2 SV=1;A0A1D5Q686_MACMU Uncharacterized protein OS=Macaca mulatta OX=9544 GN=KANK2 PE=4 SV=1;G7NL20_MACMU Uncharacterized protein OS=Macaca	6	7	7	7	11.4	91.153	54920000	74130000	50376000	52904000	54146000	67075000	96623000	81057000	70636000
A0A1D5QUM0	Uncharacterized protein	CD74	A0A1D5QUM0;A0A1D5Q6A3;I0FWR3;I0FWR4;F7E9S4;G7MVM5	A0A1D5QUM0_MACMU Uncharacterized protein OS=Macaca mulatta OX=9544 GN=CD74 PE=4 SV=1;A0A1D5Q6A3_MACMU Uncharacterized protein OS=Macaca mulatta OX=9544 GN=CD74 PE=4 SV=1;I0FWR3_MACMU HLA class II histocompatibility antigen gamma chain isoform b OS=Macaca m	6	1	1	1	9.3	16.866		15621000		10727000		10536000	16891000	18621000	34652000
A0A1D5Q6B0	COX assembly mitochondrial protein	CMC2	A0A1D5Q6B0;H9FMR0;G7NR49	A0A1D5Q6B0_MACMU COX assembly mitochondrial protein OS=Macaca mulatta OX=9544 GN=CMC2 PE=3 SV=1;H9FMR0_MACMU COX assembly mitochondrial protein OS=Macaca mulatta OX=9544 GN=C16orf61 PE=2 SV=1;G7NR49_MACMU COX assembly mitochondrial protein OS=Macaca mulatt	3	1	1	1	18.2	6.5294	48034000	31487000	32370000	40287000	43223000	49178000	47080000	82491000	48341000
A0A1D5Q6B2	Spectrin beta chain	SPTB	A0A1D5Q6B2;G7MYA8;F6SKK1;A0A1D5QC83	A0A1D5Q6B2_MACMU Spectrin beta chain OS=Macaca mulatta OX=9544 GN=SPTB PE=3 SV=1;G7MYA8_MACMU Spectrin beta chain OS=Macaca mulatta OX=9544 GN=EGK_18288 PE=3 SV=1;F6SKK1_MACMU Spectrin beta chain OS=Macaca mulatta OX=9544 GN=SPTB PE=3 SV=2	4	44	41	41	26.7	267.63	931390000	815990000	505370000	794950000	536100000	787640000	1260200000	951800000	863990000
A0A1D5QSI1	Uncharacterized protein	RPL24	A0A1D5QSI1;A0A1D5Q6B6;F6TKN9;G7MK26;A0A1D5QTK5;A0A1D5QQ56;G7MJX7;F7FF84	A0A1D5QSI1_MACMU Uncharacterized protein OS=Macaca mulatta OX=9544 GN=RPL24 PE=4 SV=1;A0A1D5Q6B6_MACMU Uncharacterized protein OS=Macaca mulatta OX=9544 GN=LOC695715 PE=4 SV=1;F6TKN9_MACMU Uncharacterized protein OS=Macaca mulatta OX=9544 GN=RPL24 PE=4 SV=	8	4	4	4	32.2	14.369	62239000	103840000	209750000	188050000	381030000	178900000	165980000	65748000	78124000
G7MZL7	Stathmin	EGK_19065	G7MZL7;H9F823;A0A1D5Q6C7;A0A1D5QZL1;F6YBA2;A0A1D5QJR2	G7MZL7_MACMU Stathmin OS=Macaca mulatta OX=9544 GN=EGK_19065 PE=3 SV=1;H9F823_MACMU Stathmin (Fragment) OS=Macaca mulatta OX=9544 GN=STMN2 PE=2 SV=1;A0A1D5Q6C7_MACMU Stathmin OS=Macaca mulatta OX=9544 GN=STMN2 PE=3 SV=1;A0A1D5QZL1_MACMU Stathmin OS=Macaca	6	2	1	1	11.3	19.574		13014000	48831000	51887000	86004000	18644000
H9F791	Olfactomedin-like protein 1 (Fragment)	OLFML1	H9F791;I0FL03;G7NDZ2;A0A1D5Q6D5	H9F791_MACMU Olfactomedin-like protein 1 (Fragment) OS=Macaca mulatta OX=9544 GN=OLFML1 PE=2 SV=1;I0FL03_MACMU Olfactomedin-like protein 1 OS=Macaca mulatta OX=9544 GN=OLFML1 PE=2 SV=1;G7NDZ2_MACMU Olfactomedin-like protein 1 OS=Macaca mulatta OX=9544 GN=E	4	4	4	4	9.9	43.916	14475000	12179000	98246000				19047000		17409000
A0A1D5Q6D6	Tripartite motif-containing protein 54 isoform 2	TRIM54	A0A1D5Q6D6;F7E925;F7B8H2;A0A1D5QDP0;A0A1D5RFT6;G7MHQ7;F6X0F9;A0A1D5QML1	A0A1D5Q6D6_MACMU Tripartite motif-containing protein 54 isoform 2 OS=Macaca mulatta OX=9544 GN=TRIM54 PE=2 SV=1;F7E925_MACMU Uncharacterized protein OS=Macaca mulatta OX=9544 GN=TRIM54 PE=4 SV=1;F7B8H2_MACMU Uncharacterized protein OS=Macaca mulatta OX=954	8	3	1	1	11.7	40.478	59324000			27981000		32048000	58364000	52566000	51236000
A0A1D5QFN3	Uncharacterized protein	TSN	A0A1D5QFN3;A0A1D5Q6F0;A0A1D5RL73;F7HU57;A0A1D5RDX1;A0A1D5RFC8	A0A1D5QFN3_MACMU Uncharacterized protein OS=Macaca mulatta OX=9544 GN=TSN PE=4 SV=1;A0A1D5Q6F0_MACMU Translin OS=Macaca mulatta OX=9544 GN=TSN PE=2 SV=1;A0A1D5RL73_MACMU Uncharacterized protein OS=Macaca mulatta OX=9544 GN=TSN PE=4 SV=1;F7HU57_MACMU Unchar	6	2	2	2	10.3	25.475	33059000	40672000	74785000	55243000	86374000	60478000	26906000	23885000	40902000
A0A1D5Q6G0	Uncharacterized protein	STXBP3	A0A1D5Q6G0;G7MIC5;F6QP55	A0A1D5Q6G0_MACMU Uncharacterized protein OS=Macaca mulatta OX=9544 GN=STXBP3 PE=3 SV=1;G7MIC5_MACMU Uncharacterized protein OS=Macaca mulatta OX=9544 GN=EGK_01033 PE=3 SV=1;F6QP55_MACMU Uncharacterized protein OS=Macaca mulatta OX=9544 GN=STXBP3 PE=3 SV=1	3	2	2	2	4.6	65.467
A0A1D5Q6H3	Eukaryotic translation initiation factor 3 subunit H	EIF3H	A0A1D5Q6H3;H9F840;F6UCC5;A0A1D5RH15	A0A1D5Q6H3_MACMU Eukaryotic translation initiation factor 3 subunit H OS=Macaca mulatta OX=9544 GN=EIF3H PE=3 SV=1;H9F840_MACMU Eukaryotic translation initiation factor 3 subunit H (Fragment) OS=Macaca mulatta OX=9544 GN=EIF3H PE=2 SV=1;F6UCC5_MACMU Eukary	4	3	3	3	12.8	37.178	45599000	51737000	37458000	33895000	31908000	59558000	75491000	46331000	61803000
A0A1D5QCX7	Uncharacterized protein	CDH2	A0A1D5QCX7;A0A1D5R7C1;A0A1D5Q6I4;A0A1D5QKP6;G7NKI8;F6WI86;H9F9T5;A0A1D5RG08;A0A1D5RDW9;A0A1D5R914;A0A1D5R1D3;G7N4A5;F7DGM2	A0A1D5QCX7_MACMU Uncharacterized protein OS=Macaca mulatta OX=9544 GN=CDH2 PE=4 SV=1;A0A1D5R7C1_MACMU Uncharacterized protein OS=Macaca mulatta OX=9544 GN=CDH2 PE=4 SV=1;A0A1D5Q6I4_MACMU Uncharacterized protein OS=Macaca mulatta OX=9544 GN=CDH2 PE=4 SV=1;A	13	15	15	15	29.1	95.25	1932400000	1791400000	1499200000	1901800000	1626800000	2107700000	2584500000	2194900000	1657900000
G7MJ50	DNA-directed RNA polymerases I, II, and III subunit RPABC3	POLR2H	G7MJ50;A0A1D5Q6K1;A0A1D5QUV3	G7MJ50_MACMU DNA-directed RNA polymerases I, II, and III subunit RPABC3 OS=Macaca mulatta OX=9544 GN=POLR2H PE=2 SV=1;A0A1D5Q6K1_MACMU Uncharacterized protein OS=Macaca mulatta OX=9544 GN=POLR2H PE=4 SV=1;A0A1D5QUV3_MACMU Uncharacterized protein OS=Macaca	3	2	2	2	15.3	17.143	5244000	18894000	22596000	14803000		29583000
A0A1D5QRL1	Septin-2	SEPTIN2	A0A1D5QRL1;A0A1D5Q6M3;F6R3X6;F6QG04;F6QFZ5;A0A1D5Q0W9	A0A1D5QRL1_MACMU Septin-2 OS=Macaca mulatta OX=9544 GN=SEPTIN2 PE=2 SV=1;A0A1D5Q6M3_MACMU Uncharacterized protein OS=Macaca mulatta OX=9544 GN=SEPTIN2 PE=3 SV=1;F6R3X6_MACMU Uncharacterized protein OS=Macaca mulatta OX=9544 GN=SEPTIN2 PE=3 SV=2;F6QG04_MACM	6	11	11	11	47.6	41.487	203100000	271910000	368810000	307800000	312060000	281040000	255990000	196070000	233470000
A0A1D5Q6N1	Uncharacterized protein	ITIH1	A0A1D5Q6N1;F7GAT9;G7ML32;A0A1D5RGP6;CON__Q0VCM5	A0A1D5Q6N1_MACMU Uncharacterized protein OS=Macaca mulatta OX=9544 GN=ITIH1 PE=4 SV=1;F7GAT9_MACMU Uncharacterized protein OS=Macaca mulatta OX=9544 GN=ITIH1 PE=4 SV=2;G7ML32_MACMU Uncharacterized protein OS=Macaca mulatta OX=9544 GN=EGK_11566 PE=4 SV=1	5	9	9	9	13.3	101.27	153510000	43625000	551580000	65513000	79339000	87787000	67832000	48551000	126470000
A0A1D5QSP5	Ubiquitin-60S ribosomal protein L40	UBA52	A0A1D5QSP5;A0A1D5R7C5;F6Q836;F6W348;A0A1D5QVS6;A0A1D5Q6N7;G7NJ03;A0A1D5QQU2;F7GN03;A0A1D5QFJ9;F7GP11;A0A1D5QXS5;F7GMU0;A0A1D5RH01;G7NNE8;A0A1D5QMQ6;G7NG02;F6PTI7;F6QWJ7;H9F5M3;F6S006;G7NS24	A0A1D5QSP5_MACMU Ubiquitin-60S ribosomal protein L40 OS=Macaca mulatta OX=9544 GN=UBA52 PE=2 SV=1;A0A1D5R7C5_MACMU Uncharacterized protein OS=Macaca mulatta OX=9544 GN=UBB PE=4 SV=1;F6Q836_MACMU Ubiquitin-40S ribosomal protein S27a OS=Macaca mulatta OX=954	22	5	5	5	36.7	14.728	4372500000	4776800000	5506300000	5374000000	8052700000	5759500000	10892000000	5533500000	5162300000
H9FB84	Pyruvate dehydrogenase kinase, isozyme 3 isoform 1 (Fragment)	PDK3	H9FB84;G7NSP8;F6PXB7;A0A1D5Q6T5;I0FSI8	H9FB84_MACMU Pyruvate dehydrogenase kinase, isozyme 3 isoform 1 (Fragment) OS=Macaca mulatta OX=9544 GN=PDK3 PE=2 SV=1;G7NSP8_MACMU [Pyruvate dehydrogenase [lipoamide]] kinase isozyme 3, mitochondrial (Fragment) OS=Macaca mulatta OX=9544 GN=EGK_20333 PE=4	5	5	5	5	17.1	44.486	83198000	64773000	41253000	52473000	60792000		43063000	45795000	79802000
G7NNF4	Uncharacterized protein (Fragment)	EGK_10343	G7NNF4;H9FBR7;I0FGM9;H9ZBZ8;A0A1D5Q6X2;F7FFJ3	G7NNF4_MACMU Uncharacterized protein (Fragment) OS=Macaca mulatta OX=9544 GN=EGK_10343 PE=4 SV=1;H9FBR7_MACMU Regulator of nonsense transcripts 1 (Fragment) OS=Macaca mulatta OX=9544 GN=UPF1 PE=2 SV=1;I0FGM9_MACMU Regulator of nonsense transcripts 1 OS=Mac	6	2	2	2	2.6	117.15		24680000	32380000		14208000
A0A1D5QYG9	Uncharacterized protein	TECRL	A0A1D5QYG9;A0A1D5Q6Z7	A0A1D5QYG9_MACMU Uncharacterized protein OS=Macaca mulatta OX=9544 GN=TECRL PE=4 SV=1;A0A1D5Q6Z7_MACMU Uncharacterized protein OS=Macaca mulatta OX=9544 GN=TECRL PE=4 SV=1	2	1	1	1	2.8	37.32	45663000		24650000	32039000	45695000	44585000			75421000
A0A1D5Q980	Uncharacterized protein	MCAM	A0A1D5Q980;G7NCK4;F6SM35;A0A1D5Q716;I0FRR9;F6SLL9	A0A1D5Q980_MACMU Uncharacterized protein OS=Macaca mulatta OX=9544 GN=MCAM PE=4 SV=1;G7NCK4_MACMU Uncharacterized protein (Fragment) OS=Macaca mulatta OX=9544 GN=EGK_06986 PE=4 SV=1;F6SM35_MACMU Uncharacterized protein OS=Macaca mulatta OX=9544 GN=MCAM PE=	6	6	6	6	14.7	66.246	60643000	61262000	87164000	51645000	75816000	56383000	146560000	104020000	68715000
F7DUG5	Succinate dehydrogenase assembly factor 2, mitochondrial	SDHAF2	F7DUG5;A0A1D5Q730	F7DUG5_MACMU Succinate dehydrogenase assembly factor 2, mitochondrial OS=Macaca mulatta OX=9544 GN=SDHAF2 PE=2 SV=1;A0A1D5Q730_MACMU Succinate dehydrogenase assembly factor 2, mitochondrial OS=Macaca mulatta OX=9544 GN=SDHAF2 PE=3 SV=1	2	1	1	1	7.2	19.654			20544000	23565000	11611000			21073000	15152000
A0A1D5QW12	Uncharacterized protein	KDSR	A0A1D5QW12;G7NKU1;A0A1D5Q761	A0A1D5QW12_MACMU Uncharacterized protein OS=Macaca mulatta OX=9544 GN=KDSR PE=3 SV=1;G7NKU1_MACMU 3-ketodihydrosphingosine reductase (Fragment) OS=Macaca mulatta OX=9544 GN=EGK_09742 PE=3 SV=1;A0A1D5Q761_MACMU 3-ketodihydrosphingosine reductase OS=Macaca m	3	1	1	1	5.4	22.651	12096000		25624000			14129000	13082000
H9FIZ4	Zinc transporter ZIP14 isoform a (Fragment)	SLC39A14	H9FIZ4;F6U2Y9;F6U2Z9;F7BH45;A0A1D5RIG3;A0A1D5Q778;G7N0N6	H9FIZ4_MACMU Zinc transporter ZIP14 isoform a (Fragment) OS=Macaca mulatta OX=9544 GN=SLC39A14 PE=2 SV=1;F6U2Y9_MACMU Uncharacterized protein OS=Macaca mulatta OX=9544 GN=SLC39A14 PE=4 SV=2;F6U2Z9_MACMU Uncharacterized protein OS=Macaca mulatta OX=9544 GN=	7	1	1	1	3.6	39.873
G7MKN4	MICOS complex subunit (Fragment)	EGK_11397	G7MKN4;A0A1D5Q786;F6VDL1;A0A1D5R0F7	G7MKN4_MACMU MICOS complex subunit (Fragment) OS=Macaca mulatta OX=9544 GN=EGK_11397 PE=3 SV=1;A0A1D5Q786_MACMU MICOS complex subunit OS=Macaca mulatta OX=9544 GN=CHCHD6 PE=2 SV=1;F6VDL1_MACMU MICOS complex subunit OS=Macaca mulatta OX=9544 GN=CHCHD6 PE=3	4	5	5	5	28.2	26.192	61245000	66291000	50180000	68002000	77775000	76006000	76194000		71440000
F6ZLB8	Endophilin-B1 isoform 1	SH3GLB1	F6ZLB8;F6ZLA9;A0A1D5Q796;A0A1D5QE68;F7HTZ6	F6ZLB8_MACMU Endophilin-B1 isoform 1 OS=Macaca mulatta OX=9544 GN=SH3GLB1 PE=2 SV=1;F6ZLA9_MACMU Uncharacterized protein OS=Macaca mulatta OX=9544 GN=EGK_00934 PE=4 SV=1;A0A1D5Q796_MACMU Uncharacterized protein OS=Macaca mulatta OX=9544 GN=SH3GLB1 PE=4 SV=	5	7	6	7	21.4	40.766	108720000	89134000	105500000	98275000	105820000	134210000	87880000	87506000	114610000
A0A1D5Q7E8	Uncharacterized protein	CDIPT	A0A1D5Q7E8;A0A1D5QKG7;G7NQI3;A0A1D5QF14	A0A1D5Q7E8_MACMU Uncharacterized protein OS=Macaca mulatta OX=9544 GN=CDIPT PE=4 SV=1;A0A1D5QKG7_MACMU CDP-diacylglycerol--inositol 3-phosphatidyltransferase OS=Macaca mulatta OX=9544 GN=CDIPT PE=3 SV=1;G7NQI3_MACMU CDP-diacylglycerol--inositol 3-phosphati	4	3	3	3	20.2	18.723	69060000	74466000	93299000	108670000	80178000	351770000	71435000	59686000	86269000
G7NJ59	Uncharacterized protein	EGK_08841	G7NJ59;F7GEV1;A0A1D5QMI6;F6YT14;A0A1D5Q7F7;A0A1D5R978	G7NJ59_MACMU Uncharacterized protein OS=Macaca mulatta OX=9544 GN=EGK_08841 PE=4 SV=1;F7GEV1_MACMU Uncharacterized protein OS=Macaca mulatta OX=9544 GN=NSF PE=4 SV=2;A0A1D5QMI6_MACMU Uncharacterized protein OS=Macaca mulatta OX=9544 GN=NSF PE=4 SV=1;F6YT14	6	4	4	4	5.5	82.139			68151000		38715000		63213000
A0A1D5RHJ8	Uncharacterized protein	API5	A0A1D5RHJ8;A0A1D5R2W1;F7EXC8;A0A1D5Q7G3;H9G122;G7NDJ7	A0A1D5RHJ8_MACMU Uncharacterized protein OS=Macaca mulatta OX=9544 GN=API5 PE=4 SV=1;A0A1D5R2W1_MACMU Uncharacterized protein OS=Macaca mulatta OX=9544 GN=API5 PE=4 SV=1;F7EXC8_MACMU Apoptosis inhibitor 5 isoform b OS=Macaca mulatta OX=9544 GN=API5 PE=2 SV	6	1	1	1	4	50.74			26458000		11482000
A0A1D5Q7G4	Uncharacterized protein		A0A1D5Q7G4;G7NCK5;F6Y2P2;G7N386;F7GN40	A0A1D5Q7G4_MACMU Uncharacterized protein OS=Macaca mulatta OX=9544 PE=4 SV=1;G7NCK5_MACMU Uncharacterized protein OS=Macaca mulatta OX=9544 GN=EGK_06987 PE=4 SV=1;F6Y2P2_MACMU Uncharacterized protein OS=Macaca mulatta OX=9544 PE=4 SV=2;G7N386_MACMU 39S rib	5	2	2	2	9.4	21.443
F7GQX9	Uncharacterized protein	CYFIP2	F7GQX9;F6TY35;F7GQY8;H9F9R7;A0A1D5R1F3;A0A1D5Q7H4;H9FSX9;A0A1D5RJI4;F7GQY1;A0A1D5QUW3	F7GQX9_MACMU Uncharacterized protein OS=Macaca mulatta OX=9544 GN=CYFIP2 PE=4 SV=1;F6TY35_MACMU Uncharacterized protein OS=Macaca mulatta OX=9544 GN=CYFIP2 PE=4 SV=2;F7GQY8_MACMU Uncharacterized protein OS=Macaca mulatta OX=9544 GN=CYFIP2 PE=4 SV=2;H9F9R7_	10	2	2	2	2.4	112.05					7028400		3755100	5498000
A0A1D5R8F9	Uncharacterized protein	TMX2	A0A1D5R8F9;H9FV65;A0A1D5Q7I0	A0A1D5R8F9_MACMU Uncharacterized protein OS=Macaca mulatta OX=9544 GN=TMX2 PE=4 SV=1;H9FV65_MACMU Thioredoxin-related transmembrane protein 2 isoform 1 OS=Macaca mulatta OX=9544 GN=TMX2 PE=2 SV=1;A0A1D5Q7I0_MACMU Uncharacterized protein OS=Macaca mulatta O	3	1	1	1	6.6	29.708							17741000	28131000
F6RYT0	Uncharacterized protein	AIMP1	F6RYT0;A0A1D5Q7J2;G7MTK6	F6RYT0_MACMU Uncharacterized protein OS=Macaca mulatta OX=9544 GN=AIMP1 PE=4 SV=2;A0A1D5Q7J2_MACMU Uncharacterized protein OS=Macaca mulatta OX=9544 GN=AIMP1 PE=4 SV=1;G7MTK6_MACMU Uncharacterized protein OS=Macaca mulatta OX=9544 GN=EGK_15991 PE=4 SV=1	3	4	4	4	17.8	35.404	75719000	49352000	74299000	109290000	124800000	87331000	71340000	67615000	65084000
A0A1D5Q7J9	Succinate--CoA ligase [ADP/GDP-forming] subunit alpha, mitochondrial	SUCLG1	A0A1D5Q7J9;G7NAH3;A0A1D5QHY3	A0A1D5Q7J9_MACMU Succinate--CoA ligase [ADP/GDP-forming] subunit alpha, mitochondrial OS=Macaca mulatta OX=9544 GN=SUCLG1 PE=3 SV=1;G7NAH3_MACMU Succinate--CoA ligase [ADP/GDP-forming] subunit alpha, mitochondrial OS=Macaca mulatta OX=9544 GN=SUCLG1 PE=2 S	3	8	8	8	33.7	35.831	4663600000	5577100000	3019800000	3579400000	3801700000	4219500000	4737800000	4756500000	3909800000
A0A1D5Q7K4	GTP-binding nuclear protein Ran	RAN	A0A1D5Q7K4;A0A1D5RKB8;F7H2M4;H9F8F4;G7N6C5;A0A1D5RE33	A0A1D5Q7K4_MACMU GTP-binding nuclear protein Ran OS=Macaca mulatta OX=9544 GN=RAN PE=2 SV=1;A0A1D5RKB8_MACMU GTP-binding nuclear protein Ran OS=Macaca mulatta OX=9544 GN=RAN PE=3 SV=1;F7H2M4_MACMU GTP-binding nuclear protein Ran OS=Macaca mulatta OX=9544 G	6	7	7	7	38.4	24.423	562850000	821100000	1350600000	1590100000	2078900000	1107300000	743650000	507700000	501660000
F6S1Q3	Serine/threonine-protein phosphatase 2A 55 kDa regulatory subunit B	PPP2R2A	F6S1Q3;A0A1D5RC73;F7H1P0;A0A1D5QE09;H9FWK6;A0A1D5QYT4;G7N0R1;A0A1D5Q7K8;A0A1D5R616;A0A1D5Q3Y4;G8F207;F6X377;A0A1D5QMV7;A0A1D5RFQ6;A0A1D5QEH8;A0A1D5R0U4;H9F9G5;F6X3A7;A0A1D5QK81;H9FWK8;F6VS43;H9FBF1;H9FWK9;A0A1D5QQR0;A0A1D5QAD0;H9FWL0;F6VLZ3;A0A1D5QZZ3;A0A1D5Q0A4;F6VS60;G7MVE3;G7MSI6;F6Z2R8;F6Z2Q9;H9EMD0;A0A1D5RB25;A0A1D5R6Y2	F6S1Q3_MACMU Serine/threonine-protein phosphatase 2A 55 kDa regulatory subunit B OS=Macaca mulatta OX=9544 GN=PPP2R2A PE=3 SV=2;A0A1D5RC73_MACMU Serine/threonine-protein phosphatase 2A 55 kDa regulatory subunit B OS=Macaca mulatta OX=9544 GN=PPP2R2A PE=3 S	37	6	6	6	18	50.026	73975000	82868000	83362000	98365000	131850000	111690000	66195000	104300000	96531000
G7NEV8	Uncharacterized protein (Fragment)	EGK_07169	G7NEV8;A0A1D5QS06;A0A1D5Q7M1;F7GRA6	G7NEV8_MACMU Uncharacterized protein (Fragment) OS=Macaca mulatta OX=9544 GN=EGK_07169 PE=3 SV=1;A0A1D5QS06_MACMU Uncharacterized protein OS=Macaca mulatta OX=9544 GN=C8G PE=3 SV=1;A0A1D5Q7M1_MACMU Uncharacterized protein OS=Macaca mulatta OX=9544 GN=C8G P	4	3	3	3	25.3	21.757	66742000	32482000	138010000		25981000		22948000	30424000	40540000
A0A1D5QGU1	Dihydrolipoyl dehydrogenase	DLD	A0A1D5QGU1;A0A1D5Q7R9;H9Z5Y2;F7HRR6;A0A1D5R3A9;A0A1D5RJC0	A0A1D5QGU1_MACMU Dihydrolipoyl dehydrogenase OS=Macaca mulatta OX=9544 GN=DLD PE=3 SV=1;A0A1D5Q7R9_MACMU Dihydrolipoyl dehydrogenase OS=Macaca mulatta OX=9544 GN=DLD PE=3 SV=1;H9Z5Y2_MACMU Dihydrolipoyl dehydrogenase OS=Macaca mulatta OX=9544 GN=DLD PE=2 S	6	19	19	19	54.5	53.763	12344000000	12268000000	7106500000	10114000000	10091000000	10404000000	11536000000	12130000000	12480000000
F6PJA8	Uncharacterized protein	KLKB1	F6PJA8;G7MSF7;A0A1D5Q7U7	F6PJA8_MACMU Uncharacterized protein OS=Macaca mulatta OX=9544 GN=KLKB1 PE=3 SV=2;G7MSF7_MACMU Uncharacterized protein OS=Macaca mulatta OX=9544 GN=EGK_16299 PE=3 SV=1;A0A1D5Q7U7_MACMU Uncharacterized protein OS=Macaca mulatta OX=9544 GN=KLKB1 PE=3 SV=1	3	1	1	1	2.1	57.63	5601300								8237500
F7F943	Uncharacterized protein	ABLIM3	F7F943;F6YHN6;A0A1D5Q7V5;A0A1D5QPQ0;F7F953;H9EPC9;A0A1D5QT10	F7F943_MACMU Uncharacterized protein OS=Macaca mulatta OX=9544 GN=ABLIM3 PE=4 SV=2;F6YHN6_MACMU Uncharacterized protein OS=Macaca mulatta OX=9544 GN=ABLIM3 PE=4 SV=2;A0A1D5Q7V5_MACMU Uncharacterized protein OS=Macaca mulatta OX=9544 GN=ABLIM3 PE=4 SV=1;A0A	7	2	2	2	4.2	61.509			22861000	21470000			29548000		18964000
C1KJY7	Beta-2-microglobulin (Fragment)	B2M	C1KJY7;C1KJY1;A0A1D5Q7X4;G1K368;I0FLX5;G7MX75;Q6V7J5	C1KJY7_MACMU Beta-2-microglobulin (Fragment) OS=Macaca mulatta OX=9544 GN=B2M PE=3 SV=1;C1KJY1_MACMU Beta-2-microglobulin (Fragment) OS=Macaca mulatta OX=9544 GN=B2M PE=3 SV=1;A0A1D5Q7X4_MACMU Beta-2-microglobulin OS=Macaca mulatta OX=9544 GN=B2M PE=3 SV=1	7	2	2	2	30.8	7.6895	195320000	141660000	200590000	134480000	123080000	146630000	288300000	134980000	160690000
A0A1D5QKP5	Uncharacterized protein	EVI5L	A0A1D5QKP5;A0A1D5QR79;H9Z520;F7FAZ9;H9FPL6;A0A1D5Q7Z2	A0A1D5QKP5_MACMU Uncharacterized protein OS=Macaca mulatta OX=9544 GN=EVI5L PE=4 SV=1;A0A1D5QR79_MACMU Uncharacterized protein OS=Macaca mulatta OX=9544 GN=EVI5L PE=4 SV=1;H9Z520_MACMU EVI5-like protein isoform 2 OS=Macaca mulatta OX=9544 GN=EVI5L PE=2 SV=	6	1	1	1	5.1	21.121	52275000	26223000	19744000			27964000	24073000	29578000	23657000
A0A1D5Q808	Uncharacterized protein	PRKACA	A0A1D5Q808;F7C1A7;H9EQQ4;G7NLZ3;F7C0Y8;A0A1D5QVK9;F7EBR5;A0A1D5RCW7;A0A1D5RHF4;A0A1D5QFQ7;H9FWY1;F7EBR0;A0A1D5Q2Z5;H9FBH8;G8F188;F7EBQ5;F6QM55;H9FWY2;F7H8Q6	A0A1D5Q808_MACMU Uncharacterized protein OS=Macaca mulatta OX=9544 GN=PRKACA PE=3 SV=1;F7C1A7_MACMU Uncharacterized protein OS=Macaca mulatta OX=9544 GN=PRKACA PE=3 SV=2;H9EQQ4_MACMU cAMP-dependent protein kinase catalytic subunit alpha isoform 1 OS=Macaca	19	8	7	8	22.3	39.216	1076700000	689220000	500870000	545320000	520980000	608180000	508800000	596090000	741120000
A0A1D5Q834	Uncharacterized protein	OBSCN	A0A1D5Q834;F7DRJ9;F7CQP1;H9FEK7;H9FE69	A0A1D5Q834_MACMU Uncharacterized protein OS=Macaca mulatta OX=9544 GN=OBSCN PE=4 SV=1;F7DRJ9_MACMU Uncharacterized protein OS=Macaca mulatta OX=9544 GN=OBSCN PE=4 SV=2;F7CQP1_MACMU Uncharacterized protein OS=Macaca mulatta OX=9544 GN=OBSCN PE=4 SV=2	5	63	1	63	10.2	942.51	1128500000	1201600000	1013900000	943630000	1131500000	1376700000	1632800000	1525500000	1384500000
F7G2Q1	Uncharacterized protein	NUP205	F7G2Q1;A0A1D5Q852;H9Z6T4;A0A1D5QRU5;G7MML0;A0A1D5QYJ7;H9FKD7;H9F8P6	F7G2Q1_MACMU Uncharacterized protein OS=Macaca mulatta OX=9544 GN=NUP205 PE=4 SV=2;A0A1D5Q852_MACMU Uncharacterized protein OS=Macaca mulatta OX=9544 GN=NUP205 PE=4 SV=1;H9Z6T4_MACMU Nuclear pore complex protein Nup205 OS=Macaca mulatta OX=9544 GN=NUP205 P	8	2	2	2	1.2	227.56
A0A1D5Q8A0	Uncharacterized protein	RALA	A0A1D5Q8A0;F7GPM1;G7MLG0	A0A1D5Q8A0_MACMU Uncharacterized protein OS=Macaca mulatta OX=9544 GN=RALA PE=4 SV=1;F7GPM1_MACMU Ras-related protein Ral-A OS=Macaca mulatta OX=9544 GN=RALA PE=2 SV=1;G7MLG0_MACMU Ras-related protein Ral-A (Fragment) OS=Macaca mulatta OX=9544 GN=EGK_13756	3	3	2	3	21.1	19.951	112780000	98410000	112010000	107620000	114250000	60198000	164790000	77524000	89861000
G7N6R2	Protein A6 (Fragment)	EGK_03544	G7N6R2;A0A1D5QYB1;A0A1D5Q8A4;I0FTQ7;F6PNQ9;F6PNP1;H9F976	G7N6R2_MACMU Protein A6 (Fragment) OS=Macaca mulatta OX=9544 GN=EGK_03544 PE=4 SV=1;A0A1D5QYB1_MACMU Uncharacterized protein OS=Macaca mulatta OX=9544 GN=TWF1 PE=4 SV=1;A0A1D5Q8A4_MACMU Uncharacterized protein OS=Macaca mulatta OX=9544 GN=TWF1 PE=4 SV=1;I0	7	2	1	1	5.8	38.246				17577000	17240000
F7BMC0	Uncharacterized protein	NAP1L1	F7BMC0;F7BLV1;F6TEK2;A0A1D5Q8B6;F7BMC8;H9YX62;H9EUH2;F6WLP2;F7BLW6;G7N7P8	F7BMC0_MACMU Uncharacterized protein OS=Macaca mulatta OX=9544 GN=NAP1L1 PE=3 SV=2;F7BLV1_MACMU Uncharacterized protein OS=Macaca mulatta OX=9544 GN=NAP1L1 PE=3 SV=2;F6TEK2_MACMU Uncharacterized protein OS=Macaca mulatta OX=9544 GN=NAP1L1 PE=3 SV=2;A0A1D5Q	10	4	3	3	17.3	37.344	32831000	112920000	318340000	154330000	396330000	166180000	74098000	46871000	86122000
A0A1D5QCR5	Uncharacterized protein	NDUFS1	A0A1D5QCR5;A0A1D5Q8E8;F7CZI8;A0A1D5Q431;A0A1D5QQ77;G7N8Q8	A0A1D5QCR5_MACMU Uncharacterized protein OS=Macaca mulatta OX=9544 GN=NDUFS1 PE=3 SV=1;A0A1D5Q8E8_MACMU Uncharacterized protein OS=Macaca mulatta OX=9544 GN=NDUFS1 PE=3 SV=1;F7CZI8_MACMU Uncharacterized protein OS=Macaca mulatta OX=9544 GN=NDUFS1 PE=4 SV=2	6	34	34	34	53.2	81.02	20476000000	17371000000	10324000000	15751000000	12014000000	10058000000	17430000000	19559000000	17977000000
A0A1D5Q8G6	Uncharacterized protein	IVD	A0A1D5Q8G6;G7MWN5;A0A1D5QP50;F7BAE1;A0A1D5QS03	A0A1D5Q8G6_MACMU Uncharacterized protein OS=Macaca mulatta OX=9544 GN=IVD PE=3 SV=1;G7MWN5_MACMU Uncharacterized protein OS=Macaca mulatta OX=9544 GN=EGK_17362 PE=3 SV=1;A0A1D5QP50_MACMU Uncharacterized protein OS=Macaca mulatta OX=9544 GN=IVD PE=3 SV=1;F7	5	12	12	12	33.5	45.222	1188700000	820810000	628500000	582780000	629790000	660220000	624760000	606820000	872940000
A0A1D5RCA8	Uncharacterized protein	SNRPA	A0A1D5RCA8;A0A1D5Q8H4;F7GVF3	A0A1D5RCA8_MACMU Uncharacterized protein OS=Macaca mulatta OX=9544 GN=SNRPA PE=4 SV=1;A0A1D5Q8H4_MACMU Uncharacterized protein OS=Macaca mulatta OX=9544 GN=SNRPA PE=4 SV=1;F7GVF3_MACMU U1 small nuclear ribonucleoprotein A OS=Macaca mulatta OX=9544 GN=SNRPA	3	2	2	2	30.5	10.911			85864000	90160000	114170000		45674000		49619000
A0A1D5Q8I4	T-complex protein 1 subunit epsilon	CCT5	A0A1D5Q8I4;F7HKA3;F7GKC2;A0A1D5QSX4;A0A1D5R2N2;A0A1D5Q345	A0A1D5Q8I4_MACMU T-complex protein 1 subunit epsilon OS=Macaca mulatta OX=9544 GN=CCT5 PE=2 SV=1;F7HKA3_MACMU Uncharacterized protein OS=Macaca mulatta OX=9544 GN=CCT5 PE=3 SV=2;F7GKC2_MACMU Uncharacterized protein OS=Macaca mulatta OX=9544 GN=CCT5 PE=3 SV	6	20	20	20	44	59.67	494190000	447290000	1075800000	1171600000	1702900000	678200000	567310000	399660000	269250000
F6PL38	AP-2 complex subunit alpha	AP2A1	F6PL38;H9FQL0;I0FPJ5;I0FPJ3;A0A1D5QWN0;F6PL31;A0A1D5Q8J6;H9FQK9;H9FQK7;H9FQK8;I2CUB9;H9FQM0;H9Z5S3;F6QED1;G7NLQ1;A0A1D5QQD7;G7NBJ9	F6PL38_MACMU AP-2 complex subunit alpha OS=Macaca mulatta OX=9544 GN=AP2A1 PE=3 SV=2;H9FQL0_MACMU AP-2 complex subunit alpha OS=Macaca mulatta OX=9544 GN=AP2A1 PE=2 SV=1;I0FPJ5_MACMU AP-2 complex subunit alpha OS=Macaca mulatta OX=9544 GN=AP2A1 PE=2 SV=1;I	17	3	3	3	5.4	104.9	51697000	49616000	67658000	48602000	33248000		47718000		45871000
F6RM24	Uncharacterized protein	NCAM1	F6RM24;H9FUS9;A0A1D5RJU2;A0A1D5QJ32;A0A1D5QR59;F6RM33;H9FUS4;H9FUS3;G7NC23;H9FUS8;A0A1D5QXN3;A0A1D5Q8J7;A0A1D5QMY4;A0A1D5R867	F6RM24_MACMU Uncharacterized protein OS=Macaca mulatta OX=9544 GN=NCAM1 PE=4 SV=2;H9FUS9_MACMU Neural cell adhesion molecule 1 isoform 4 OS=Macaca mulatta OX=9544 PE=2 SV=1;A0A1D5RJU2_MACMU Uncharacterized protein OS=Macaca mulatta OX=9544 GN=NCAM1 PE=4 SV	14	4	4	4	5.8	80.205	46648000	39595000	40337000		22663000	34566000	101930000	68103000	52539000
A0A1D5Q8R9	Uncharacterized protein	SMIM6	A0A1D5Q8R9	A0A1D5Q8R9_MACMU Uncharacterized protein OS=Macaca mulatta OX=9544 GN=SMIM6 PE=4 SV=1	1	1	1	1	11.3	7.1702				20660000
F7CYW6	Uncharacterized protein	HUWE1	F7CYW6;A0A1D5RL00;H9ELS9;G7NRH6;A0A1D5Q8T6	F7CYW6_MACMU Uncharacterized protein OS=Macaca mulatta OX=9544 GN=HUWE1 PE=4 SV=2;A0A1D5RL00_MACMU Uncharacterized protein OS=Macaca mulatta OX=9544 GN=HUWE1 PE=4 SV=1;H9ELS9_MACMU E3 ubiquitin-protein ligase HUWE1 OS=Macaca mulatta OX=9544 GN=HUWE1 PE=2 S	5	2	2	2	0.7	463.76
A0A1D5QWR6	Uncharacterized protein		A0A1D5QWR6;A0A1D5Q8Y7	A0A1D5QWR6_MACMU Uncharacterized protein OS=Macaca mulatta OX=9544 PE=4 SV=1;A0A1D5Q8Y7_MACMU Uncharacterized protein OS=Macaca mulatta OX=9544 PE=4 SV=1	2	1	1	1	6.8	21.221		14910000	38987000	31152000	47135000		12996000
F7GGE0	Cullin-5	CUL5	F7GGE0;A0A1D5Q8Z6;A0A1D5QC69;A0A1D5R8S1	F7GGE0_MACMU Cullin-5 OS=Macaca mulatta OX=9544 GN=CUL5 PE=2 SV=1;A0A1D5Q8Z6_MACMU Uncharacterized protein OS=Macaca mulatta OX=9544 GN=CUL5 PE=3 SV=1;A0A1D5QC69_MACMU Uncharacterized protein OS=Macaca mulatta OX=9544 GN=CUL5 PE=3 SV=1;A0A1D5R8S1_MACMU Unc	4	3	3	3	6.4	90.954		12128000	6098700	10497000	7964800			7199500
A0A1D5R3A4	Signal recognition particle subunit SRP72	SRP72	A0A1D5R3A4;H9FYW1;F7GNJ4;A0A1D5Q902	A0A1D5R3A4_MACMU Signal recognition particle subunit SRP72 OS=Macaca mulatta OX=9544 GN=SRP72 PE=3 SV=1;H9FYW1_MACMU Signal recognition particle subunit SRP72 OS=Macaca mulatta OX=9544 GN=SRP72 PE=2 SV=1;F7GNJ4_MACMU Signal recognition particle subunit SRP	4	2	2	2	4.9	67.89	7892800		15898000	20688000	13218000	9039800			4808500
F7FR59	Uncharacterized protein	RNPEP	F7FR59;H9F8Y3;G7MEY8;F6TYZ5;H9YZZ3;A0A1D5Q912	F7FR59_MACMU Uncharacterized protein OS=Macaca mulatta OX=9544 GN=RNPEP PE=4 SV=2;H9F8Y3_MACMU Aminopeptidase B (Fragment) OS=Macaca mulatta OX=9544 GN=RNPEP PE=2 SV=1;G7MEY8_MACMU Uncharacterized protein OS=Macaca mulatta OX=9544 GN=EGK_01806 PE=4 SV=1;F6	6	2	2	2	4.6	59.471					29600000			6588300
A0A1D5Q915	Uncharacterized protein	PTGES3	A0A1D5Q915;H9Z4J1;H9EM56;A0A1D5QLK8;F6Q847;A0A1D5RJ41;A0A1D5QGG7;G7N7D8;H9EXC7;A0A1D5QBR2;A0A1D5QRA2	A0A1D5Q915_MACMU Uncharacterized protein OS=Macaca mulatta OX=9544 GN=PTGES3 PE=4 SV=1;H9Z4J1_MACMU Prostaglandin E synthase 3 OS=Macaca mulatta OX=9544 GN=PTGES3 PE=2 SV=1;H9EM56_MACMU Prostaglandin E synthase 3 OS=Macaca mulatta OX=9544 GN=PTGES3 PE=2 SV	11	7	7	7	48.2	16.476		98745000	183150000	187730000	457610000	125740000	70491000	55938000	88367000
H9G215	Tight junction protein ZO-2 isoform 4	TJP2	H9G215;F7F8F4;I2CXW8;I0FWI9;H9G213;A0A1D5Q924;H9G212;A0A1D5QPT5	H9G215_MACMU Tight junction protein ZO-2 isoform 4 OS=Macaca mulatta OX=9544 GN=TJP2 PE=2 SV=1;F7F8F4_MACMU Uncharacterized protein OS=Macaca mulatta OX=9544 GN=TJP2 PE=3 SV=2;I2CXW8_MACMU Tight junction protein ZO-2 isoform 1 OS=Macaca mulatta OX=9544 GN=	8	1	1	1	1	130.09							26767000
A0A1D5Q933	Uncharacterized protein	TRA2B	A0A1D5Q933;G7MJ36;F6TT71;Q8WMQ0;Q8WMQ1	A0A1D5Q933_MACMU Uncharacterized protein OS=Macaca mulatta OX=9544 GN=TRA2B PE=4 SV=1;G7MJ36_MACMU Uncharacterized protein (Fragment) OS=Macaca mulatta OX=9544 GN=EGK_11817 PE=4 SV=1;F6TT71_MACMU Transformer-2 protein homolog beta OS=Macaca mulatta OX=9544	5	4	3	4	22.3	21.935	25018000	56212000	86797000	91156000	114800000	40773000	32963000
G7MFK7	Adenylosuccinate synthetase (Fragment)	EGK_02067	G7MFK7;F7HTL0;A0A1D5Q943	G7MFK7_MACMU Adenylosuccinate synthetase (Fragment) OS=Macaca mulatta OX=9544 GN=EGK_02067 PE=3 SV=1;F7HTL0_MACMU Adenylosuccinate synthetase isozyme 2 OS=Macaca mulatta OX=9544 GN=ADSS PE=2 SV=1;A0A1D5Q943_MACMU Adenylosuccinate synthetase isozyme 2 OS=Ma	3	2	2	2	5.2	46.625				22745000	34607000
F7E8R2	Uncharacterized protein	TRIM55	F7E8R2;A0A1D5QK94;A0A1D5Q948;G8F160;F7E920;A0A1D5QDD7;A0A1D5QS25	F7E8R2_MACMU Uncharacterized protein OS=Macaca mulatta OX=9544 GN=TRIM55 PE=4 SV=2;A0A1D5QK94_MACMU Uncharacterized protein OS=Macaca mulatta OX=9544 GN=TRIM55 PE=4 SV=1;A0A1D5Q948_MACMU Uncharacterized protein OS=Macaca mulatta OX=9544 GN=TRIM55 PE=4 SV=1	7	4	2	4	8.8	50.918	65757000	65530000	52618000		98951000	72676000	210160000	83166000	99245000
A0A1D5QNV1	NADPH:adrenodoxin oxidoreductase, mitochondrial	FDXR	A0A1D5QNV1;F6RKZ7;A0A1D5RDU0;F7C8Q2;H9F5G2;H9YWH2;G7NGM9;I2CWN6;A0A1D5QBY4;A0A1D5Q950;A0A1D5R429	A0A1D5QNV1_MACMU NADPH:adrenodoxin oxidoreductase, mitochondrial OS=Macaca mulatta OX=9544 GN=FDXR PE=3 SV=1;F6RKZ7_MACMU NADPH:adrenodoxin oxidoreductase, mitochondrial OS=Macaca mulatta OX=9544 GN=FDXR PE=3 SV=2;A0A1D5RDU0_MACMU NADPH:adrenodoxin oxidore	11	1	1	1	3	47.697	14141000	13068000	12111000		11406000	15265000		26769000	20014000
G7N6W1	Tubulin alpha chain (Fragment)	EGK_03609	G7N6W1;A0A1D5Q9B4;G7N6W2;Q9GLW6;F6Y0X7;F7HU50;F7DXU0;F7DXF0;F7HNA9;F7H8S7;H9Z495;H9Z491;H9Z489;F7BVJ2;F7B0U6	G7N6W1_MACMU Tubulin alpha chain (Fragment) OS=Macaca mulatta OX=9544 GN=EGK_03609 PE=3 SV=1;A0A1D5Q9B4_MACMU Tubulin alpha chain OS=Macaca mulatta OX=9544 GN=TUBA1B PE=2 SV=1;G7N6W2_MACMU Tubulin alpha chain (Fragment) OS=Macaca mulatta OX=9544 GN=EGK_036	15	20	0	3	55.2	50.148	1982800000	2102300000	4197200000	3741400000	4558000000	3070600000	2643600000	1413600000	1560600000
H9Z1Q8	Aldo-keto reductase family 1 member B10	AKR1B10	H9Z1Q8;A0A1D5Q9E4;I0FM08;F7E0Z7;F6R7F0;H9H356;G8F1H1;F6T164;G7MME9;A0A1D5Q1K7;A0A1D5R951;F7HGV6;F7HGX4;F7HGX6	H9Z1Q8_MACMU Aldo-keto reductase family 1 member B10 OS=Macaca mulatta OX=9544 GN=AKR1B10 PE=2 SV=1;A0A1D5Q9E4_MACMU Uncharacterized protein OS=Macaca mulatta OX=9544 GN=LOC721151 PE=4 SV=1;I0FM08_MACMU Aldo-keto reductase family 1 member B10 OS=Macaca mul	14	15	1	13	48.7	36.171	1018200000	852790000	1127100000	25001000	559670000	349350000	266750000	955000000	851270000
A0A1D5Q9I3	Uncharacterized protein	RPS15	A0A1D5Q9I3;G7NL52;F6VFF5;I2CUI0	A0A1D5Q9I3_MACMU Uncharacterized protein OS=Macaca mulatta OX=9544 GN=RPS15 PE=3 SV=1;G7NL52_MACMU Uncharacterized protein (Fragment) OS=Macaca mulatta OX=9544 GN=EGK_09847 PE=3 SV=1;F6VFF5_MACMU Uncharacterized protein OS=Macaca mulatta OX=9544 GN=RPS15 P	4	3	3	3	29.6	17.707	166660000	251990000	382560000	493260000	837840000	270600000	347070000	195020000	205950000
A0A1D5Q9L3	3-hydroxyisobutyryl-CoA hydrolase, mitochondrial	HIBCH	A0A1D5Q9L3;H9EVP2;A0A1D5RL20;F7FC26;G7N8I4;F7FBK6	A0A1D5Q9L3_MACMU 3-hydroxyisobutyryl-CoA hydrolase, mitochondrial OS=Macaca mulatta OX=9544 GN=HIBCH PE=3 SV=1;H9EVP2_MACMU 3-hydroxyisobutyryl-CoA hydrolase, mitochondrial OS=Macaca mulatta OX=9544 GN=HIBCH PE=2 SV=1;A0A1D5RL20_MACMU 3-hydroxyisobutyryl-C	6	11	11	11	32.1	42.626	799000000	691730000	423910000	570090000	398470000	605200000	675140000	659300000	677830000
A0A1D5QXE4	F-actin-capping protein subunit alpha	CAPZA1	A0A1D5QXE4;A0A1D5Q9M8;A0A1D5QSF5;H9G0D0;G7MII2;A0A1D5QW06;A0A1D5RAJ5	A0A1D5QXE4_MACMU F-actin-capping protein subunit alpha OS=Macaca mulatta OX=9544 GN=CAPZA1 PE=3 SV=1;A0A1D5Q9M8_MACMU F-actin-capping protein subunit alpha OS=Macaca mulatta OX=9544 GN=CAPZA1 PE=3 SV=1;A0A1D5QSF5_MACMU F-actin-capping protein subunit alpha	7	7	6	6	43.5	31.915	184250000	174220000	176560000	128710000	222900000	152600000	192410000	131140000	135080000
I0FTY1	Radixin	RDX	I0FTY1;A0A1D5Q9N1;F6VZ13;A0A1D5R2N4	I0FTY1_MACMU Radixin OS=Macaca mulatta OX=9544 GN=RDX PE=2 SV=1;A0A1D5Q9N1_MACMU Uncharacterized protein OS=Macaca mulatta OX=9544 GN=RDX PE=4 SV=1;F6VZ13_MACMU Uncharacterized protein OS=Macaca mulatta OX=9544 GN=RDX PE=4 SV=2	4	18	6	6	27.8	68.549	134850000	115140000	166000000	196080000	194580000	151820000	140280000	130190000	146530000
A0A1D5QQW2	Uncharacterized protein	DYNC1I2	A0A1D5QQW2;H9FQT8;F7GNP7;F7F6Y6;G7N8A8;F7F396;F7F6T8;A0A1D5Q9P4	A0A1D5QQW2_MACMU Uncharacterized protein OS=Macaca mulatta OX=9544 GN=DYNC1I2 PE=4 SV=1;H9FQT8_MACMU Cytoplasmic dynein 1 intermediate chain 2 OS=Macaca mulatta OX=9544 GN=DYNC1I2 PE=2 SV=1;F7GNP7_MACMU Uncharacterized protein OS=Macaca mulatta OX=9544 GN=	8	3	3	3	7.4	68.297	64522000	48919000	39480000	69163000	71360000	52344000	74752000	51467000	41905000
A0A1D5Q9Q5	ADP-sugar pyrophosphatase	NUDT5	A0A1D5Q9Q5;A0A1D5RC75;F7HCK0;A0A1D5QNV6;G7N1K9;F7H2R7	A0A1D5Q9Q5_MACMU ADP-sugar pyrophosphatase OS=Macaca mulatta OX=9544 GN=NUDT5 PE=2 SV=1;A0A1D5RC75_MACMU Uncharacterized protein OS=Macaca mulatta OX=9544 GN=NUDT5 PE=3 SV=1;F7HCK0_MACMU Uncharacterized protein OS=Macaca mulatta OX=9544 GN=NUDT5 PE=3 SV=2;	6	4	4	4	22.8	24.322			50072000	41231000	52427000
F6Z6X5	Sodium/potassium-transporting ATPase subunit alpha	ATP12A	F6Z6X5;A0A1D5Q9S7;G7NJS5	F6Z6X5_MACMU Sodium/potassium-transporting ATPase subunit alpha OS=Macaca mulatta OX=9544 GN=ATP12A PE=3 SV=2;A0A1D5Q9S7_MACMU Sodium/potassium-transporting ATPase subunit alpha OS=Macaca mulatta OX=9544 GN=ATP12A PE=3 SV=1;G7NJS5_MACMU Uncharacterized pro	3	6	1	1	4.7	111.94	92454000	70853000	46472000	66384000	47980000	42638000	88065000	72600000	70747000
A0A1D5Q9S9	Uncharacterized protein	COPS8	A0A1D5Q9S9;G7N990	A0A1D5Q9S9_MACMU Uncharacterized protein OS=Macaca mulatta OX=9544 GN=COPS8 PE=4 SV=1;G7N990_MACMU COP9 signalosome complex subunit 8 isoform 1 OS=Macaca mulatta OX=9544 GN=COPS8 PE=2 SV=1	2	1	1	1	8.7	19.344		24689000	28710000	22863000	20593000	23873000	13628000	14733000
A0A1D5Q9Y0	Uncharacterized protein		A0A1D5Q9Y0	A0A1D5Q9Y0_MACMU Uncharacterized protein OS=Macaca mulatta OX=9544 PE=3 SV=1	1	1	1	1	13.3	11.175					38210000
F7C0Q1	Uncharacterized protein	GPHN	F7C0Q1;A0A1D5R2P4;A0A1D5QVA5;F6YM77;H9FNK4;F7BVX2;H9Z463;A0A1D5QA07	F7C0Q1_MACMU Uncharacterized protein OS=Macaca mulatta OX=9544 GN=GPHN PE=4 SV=1;A0A1D5R2P4_MACMU Molybdopterin molybdenumtransferase OS=Macaca mulatta OX=9544 GN=GPHN PE=3 SV=1;A0A1D5QVA5_MACMU Molybdopterin molybdenumtransferase OS=Macaca mulatta OX=9544	8	1	1	1	3.7	41.345
F7FVE3	Uncharacterized protein	HMGN3	F7FVE3;A0A1D5QA61;G7N452;H9ZFF4;G7NK72;G7NLD3;G7MJL7;F7GHB8;F7FJE3;F6Y111;F6UGV3;F6TD15;A0A1D5RDQ2;A0A1D5RD58;F7GNK8;G7MPS5;H9G1X1	F7FVE3_MACMU Uncharacterized protein OS=Macaca mulatta OX=9544 GN=HMGN3 PE=4 SV=2;A0A1D5QA61_MACMU Uncharacterized protein OS=Macaca mulatta OX=9544 GN=HMGN3 PE=4 SV=1	17	3	3	3	20	13.956	373040000	28553000	845590000	804960000	824190000	866600000	28293000	96385000	471670000
F6QSQ3	Uncharacterized protein	EZR	F6QSQ3;G7MQ13;H9YUX6;H9FZE0;A0A1D5RI57;A0A1D5QA62	F6QSQ3_MACMU Uncharacterized protein OS=Macaca mulatta OX=9544 GN=EZR PE=4 SV=2;G7MQ13_MACMU Uncharacterized protein (Fragment) OS=Macaca mulatta OX=9544 GN=EGK_15219 PE=4 SV=1;H9YUX6_MACMU Ezrin OS=Macaca mulatta OX=9544 GN=EZR PE=2 SV=1;H9FZE0_MACMU Ezri	6	23	12	12	36.7	69.15	604230000	594430000	620540000	703630000	1026800000	632480000	414290000	416190000	453720000
A0A1D5QAE2	Uncharacterized protein	MKNK1	A0A1D5QAE2;F6TR31;F6TJV6;F6TJU6	A0A1D5QAE2_MACMU Uncharacterized protein OS=Macaca mulatta OX=9544 GN=MKNK1 PE=4 SV=1;F6TR31_MACMU Uncharacterized protein OS=Macaca mulatta OX=9544 GN=MKNK1 PE=3 SV=2;F6TJV6_MACMU Uncharacterized protein (Fragment) OS=Macaca mulatta OX=9544 GN=EGK_00721 P	4	1	1	1	10.7	12.515			93236000	77174000	72659000				42695000
G7MQ09	Uncharacterized protein	EGK_15210	G7MQ09;F7E0I2;A0A1D5QAE8;F7E093	G7MQ09_MACMU Uncharacterized protein OS=Macaca mulatta OX=9544 GN=EGK_15210 PE=4 SV=1;F7E0I2_MACMU Uncharacterized protein OS=Macaca mulatta OX=9544 GN=LOC705797 PE=4 SV=2;A0A1D5QAE8_MACMU Uncharacterized protein C6orf203 isoform b OS=Macaca mulatta OX=954	4	1	1	1	9.2	27.903	59059000	57751000		51803000	29898000		38641000	51921000	58208000
A0A1D5QAF8	Uncharacterized protein	LOC704347	A0A1D5QAF8;I0FGN5;F6QN95;G7N8Q9;A0A1D5QEM7;A0A1D5Q604	A0A1D5QAF8_MACMU Uncharacterized protein OS=Macaca mulatta OX=9544 GN=LOC704347 PE=3 SV=1;I0FGN5_MACMU Elongation factor 1-beta OS=Macaca mulatta OX=9544 GN=EEF1B2 PE=2 SV=1;F6QN95_MACMU Uncharacterized protein OS=Macaca mulatta OX=9544 GN=EEF1B2 PE=3 SV=2	6	3	3	3	18	23.155	118550000	153160000	304380000	308360000	558840000	244260000	88652000	107130000	75919000
A0A1D5QAI4	Uncharacterized protein	SPTAN1	A0A1D5QAI4;H9F6V7	A0A1D5QAI4_MACMU Uncharacterized protein OS=Macaca mulatta OX=9544 GN=SPTAN1 PE=4 SV=1;H9F6V7_MACMU Spectrin alpha chain, brain isoform 1 (Fragment) OS=Macaca mulatta OX=9544 GN=SPTAN1 PE=2 SV=1	2	127	1	1	63.2	282.95	63166000	82292000	83618000	74678000	52834000	56009000	90564000	67958000	54699000
A0A1D5QAJ7	Uncharacterized protein	YWHAZ	A0A1D5QAJ7;F7HBD4;F7EFF6;A0A1D5QVP5;G7N1Q9;A0A1D5Q034;A0A1D5QSF9;G7MS92;A0A1D5RIF0	A0A1D5QAJ7_MACMU Uncharacterized protein OS=Macaca mulatta OX=9544 GN=YWHAZ PE=3 SV=1;F7HBD4_MACMU 14-3-3 protein zeta/delta OS=Macaca mulatta OX=9544 GN=YWHAZ PE=2 SV=1;F7EFF6_MACMU Uncharacterized protein OS=Macaca mulatta OX=9544 GN=YWHAZ PE=3 SV=2;A0A1	9	16	13	14	64.6	26.144	3287900000	3625100000	5213100000	4234400000	6381900000	4131600000	2982700000	2881100000	2252900000
A0A1D5QEK4	Uncharacterized protein	LOC716090	A0A1D5QEK4;A0A1D5QAN8;G7NE48;F6ZTZ9;H9FV16;G7MTV8;A0A1D5QJ44;A0A1D5RGV6;A0A1D5RIT6;F6VT89	A0A1D5QEK4_MACMU Uncharacterized protein OS=Macaca mulatta OX=9544 GN=LOC716090 PE=4 SV=1;A0A1D5QAN8_MACMU Uncharacterized protein OS=Macaca mulatta OX=9544 GN=LOC716090 PE=3 SV=1;G7NE48_MACMU Uncharacterized protein OS=Macaca mulatta OX=9544 GN=EGK_06591	10	2	2	2	8.5	36.442	6550400	36132000		19383000		18594000			14050000
A0A1D5QAP4	Uncharacterized protein	NDRG4	A0A1D5QAP4;G7NPW5;H9ETE0;A0A1D5R9F4;A0A1D5RFU9;A0A1D5QJM0;F7GNI4;F7GNI7;A0A1D5QMI2	A0A1D5QAP4_MACMU Uncharacterized protein OS=Macaca mulatta OX=9544 GN=NDRG4 PE=4 SV=1;G7NPW5_MACMU Uncharacterized protein (Fragment) OS=Macaca mulatta OX=9544 GN=EGK_12844 PE=4 SV=1;H9ETE0_MACMU Protein NDRG4 isoform 2 OS=Macaca mulatta OX=9544 GN=NDRG4 P	9	8	8	8	30.5	40.703	701950000	622300000	441540000	558930000	366730000	570050000	929320000	842230000	666660000
H9FAE8	Ras-related protein R-Ras2 isoform a (Fragment)	RRAS2	H9FAE8;A0A1D5QAR1;A0A1D5RKK5;F7A890;G7NDV6;A0A1D5Q108	H9FAE8_MACMU Ras-related protein R-Ras2 isoform a (Fragment) OS=Macaca mulatta OX=9544 GN=RRAS2 PE=2 SV=1;A0A1D5QAR1_MACMU Ras-related protein R-Ras2 isoform a OS=Macaca mulatta OX=9544 GN=RRAS2 PE=2 SV=1;A0A1D5RKK5_MACMU Uncharacterized protein OS=Macaca	6	5	3	3	33	22.396	50387000	70955000	60071000	56852000	69479000	83497000	113490000	84935000	60772000
F6Z238	Coatomer subunit gamma	COPG1	F6Z238;A0A1D5QAT5;H9FRE4;G7N7U5;A0A1D5RIP7;A0A1D5Q9S6;G7MMD8;F6S6K6;A0A1D5QXL9	F6Z238_MACMU Coatomer subunit gamma OS=Macaca mulatta OX=9544 GN=COPG1 PE=3 SV=2;A0A1D5QAT5_MACMU Coatomer subunit gamma OS=Macaca mulatta OX=9544 GN=COPG1 PE=3 SV=1;H9FRE4_MACMU Coatomer subunit gamma OS=Macaca mulatta OX=9544 GN=COPG PE=2 SV=1;G7N7U5_MAC	9	7	7	7	12.4	96.159	15610000	37706000	83048000	79934000	106580000	49888000	42465000		29189000
A0A1D5QAT7	Uncharacterized protein	LARS2	A0A1D5QAT7;G7MIU9	A0A1D5QAT7_MACMU Uncharacterized protein OS=Macaca mulatta OX=9544 GN=LARS2 PE=4 SV=1;G7MIU9_MACMU Putative leucyl-tRNA synthetase, mitochondrial OS=Macaca mulatta OX=9544 GN=LARS2 PE=2 SV=1	2	2	2	2	3.8	96.768	36275000	31523000		13429000			24429000	12612000	17807000
A0A1D5QAW0	Uncharacterized protein	LYPLAL1	A0A1D5QAW0;H9FPV3;G7MEJ3;F7CPP0	A0A1D5QAW0_MACMU Uncharacterized protein OS=Macaca mulatta OX=9544 GN=LYPLAL1 PE=4 SV=1;H9FPV3_MACMU Lysophospholipase-like protein 1 OS=Macaca mulatta OX=9544 GN=LYPLAL1 PE=2 SV=1;G7MEJ3_MACMU Uncharacterized protein OS=Macaca mulatta OX=9544 GN=EGK_01645	4	1	1	1	4.5	24.789					10474000
A0A1D5QAZ2	Uncharacterized protein		A0A1D5QAZ2	A0A1D5QAZ2_MACMU Uncharacterized protein OS=Macaca mulatta OX=9544 PE=4 SV=1	1	1	1	1	4.4	38.221	27465000			22841000			26809000	16395000	25643000
F6R400	Uncharacterized protein	HDLBP	F6R400;H9YUA5;H9FTN7;G7N9D9;A0A1D5QB27;F6R3Z3	F6R400_MACMU Uncharacterized protein OS=Macaca mulatta OX=9544 GN=HDLBP PE=4 SV=2;H9YUA5_MACMU Vigilin OS=Macaca mulatta OX=9544 GN=HDLBP PE=2 SV=1;H9FTN7_MACMU Vigilin OS=Macaca mulatta OX=9544 GN=HDLBP PE=2 SV=1;G7N9D9_MACMU Uncharacterized protein OS=Ma	6	7	7	7	7.8	140.85	37826000	44430000	52319000	40738000	35992000		34472000
I0FSE1	Eukaryotic translation initiation factor 3 subunit L	EIF3L	I0FSE1;H9FVH1;G7N3T7;A0A1D5QB71;F7G5H6;A0A1D5R0J3;A0A1D5Q7A7;A0A1D5Q7B8	I0FSE1_MACMU Eukaryotic translation initiation factor 3 subunit L OS=Macaca mulatta OX=9544 GN=EIF3L PE=2 SV=1;H9FVH1_MACMU Eukaryotic translation initiation factor 3 subunit L OS=Macaca mulatta OX=9544 GN=EIF3L PE=2 SV=1;G7N3T7_MACMU Eukaryotic translatio	8	9	9	9	19.9	66.726		26208000	47551000	60914000	238740000	45791000	101840000	62206000	18038000
F7DN38	Catenin alpha-1	CTNNA1	F7DN38;A0A1D5QB83;F7DN31;F6UDA1;A0A1D5QTQ1;A0A1D5Q6J1;A0A1D5QJI2;A0A1D5QZ43;I0FM46;Q6UIR4;A0A1D5QI13;F6YFJ6	F7DN38_MACMU Catenin alpha-1 OS=Macaca mulatta OX=9544 GN=CTNNA1 PE=2 SV=1;A0A1D5QB83_MACMU Uncharacterized protein OS=Macaca mulatta OX=9544 GN=CTNNA1 PE=4 SV=1;F7DN31_MACMU Uncharacterized protein OS=Macaca mulatta OX=9544 GN=CTNNA1 PE=4 SV=2;F6UDA1_MACM	12	25	21	24	41.7	100.12	778030000	796040000	774960000	883600000	931670000	701660000	1344100000	1089400000	705930000
F7BKH7	Aconitate hydratase, mitochondrial	ACO2	F7BKH7;A0A1D5QB91;A0A1D5RC78	F7BKH7_MACMU Aconitate hydratase, mitochondrial OS=Macaca mulatta OX=9544 GN=ACO2 PE=2 SV=1;A0A1D5QB91_MACMU Uncharacterized protein OS=Macaca mulatta OX=9544 GN=ACO2 PE=4 SV=1;A0A1D5RC78_MACMU Aconitate hydratase, mitochondrial OS=Macaca mulatta OX=9544 G	3	46	46	46	61	85.346	36012000000	43739000000	29665000000	39493000000	33517000000	54736000000	44052000000	49729000000	46132000000
A0A1D5QBE0	Uncharacterized protein	HMGB2	A0A1D5QBE0;F7EJE5;H9Z8B1;H9EQP8;G7MSB5;F7GLH2	A0A1D5QBE0_MACMU Uncharacterized protein OS=Macaca mulatta OX=9544 GN=HMGB2 PE=4 SV=1;F7EJE5_MACMU Uncharacterized protein OS=Macaca mulatta OX=9544 GN=HMGB2 PE=4 SV=2;H9Z8B1_MACMU High mobility group protein B2 OS=Macaca mulatta OX=9544 GN=HMGB2 PE=2 SV=1	6	2	2	2	11.8	23.34	95443000	81792000	145250000	107100000	170630000	102670000	123420000	93756000	77723000
A0A1D5QBF2	Uncharacterized protein	PRKAG1	A0A1D5QBF2;F6SF90;A0A1D5RAK4;A0A1D5RI01;A0A1D5QVK6;H9EQE8;G7N6V6;A0A1D5R4K4;A0A1D5Q8I0;A0A1D5R5V9;G7MNI0	A0A1D5QBF2_MACMU Uncharacterized protein OS=Macaca mulatta OX=9544 GN=PRKAG1 PE=4 SV=1;F6SF90_MACMU Uncharacterized protein OS=Macaca mulatta OX=9544 GN=PRKAG1 PE=4 SV=2;A0A1D5RAK4_MACMU Uncharacterized protein OS=Macaca mulatta OX=9544 GN=PRKAG1 PE=4 SV=1	11	5	5	5	25.7	31.905		40157000	64001000	92592000	51890000			159380000	50065000
H9FAX5	Eukaryotic translation initiation factor 3 subunit E (Fragment)	EIF3E	H9FAX5;F6Y9K8;G7MZY3;F6WLV7;F6Y9Q0;A0A1D5QBF5;F6Y9P2	H9FAX5_MACMU Eukaryotic translation initiation factor 3 subunit E (Fragment) OS=Macaca mulatta OX=9544 GN=EIF3E PE=2 SV=1;F6Y9K8_MACMU Eukaryotic translation initiation factor 3 subunit E OS=Macaca mulatta OX=9544 GN=EIF3E PE=3 SV=2;G7MZY3_MACMU Eukaryotic	7	10	10	10	26.9	50.67	93709000	84234000	138400000	176920000	259070000	156730000	128880000	133450000	67173000
A0A1D5QBG4	Uncharacterized protein	NHLRC2	A0A1D5QBG4;H9Z8P8;H9FU50;F6TP26	A0A1D5QBG4_MACMU Uncharacterized protein OS=Macaca mulatta OX=9544 GN=NHLRC2 PE=4 SV=1;H9Z8P8_MACMU NHL repeat-containing protein 2 OS=Macaca mulatta OX=9544 GN=NHLRC2 PE=2 SV=1;H9FU50_MACMU NHL repeat-containing protein 2 OS=Macaca mulatta OX=9544 GN=NHLR	4	3	3	3	4.8	75.007	20295000	30845000	25865000	36187000	12258000	30322000	19377000		17954000
G7NPL6	Phosphomannomutase	EGK_12485	G7NPL6;A0A1D5QBK6	G7NPL6_MACMU Phosphomannomutase OS=Macaca mulatta OX=9544 GN=EGK_12485 PE=3 SV=1;A0A1D5QBK6_MACMU Phosphomannomutase OS=Macaca mulatta OX=9544 GN=PMM2 PE=2 SV=1	2	1	1	1	4.9	27.971			18537000		17613000
H9FUP6	S-methyl-5-thioadenosine phosphorylase	MTAP	H9FUP6;G7NFW3;F6RQM9;A0A1D5QBM9;A0A1D5QT52;F6RQL9;A0A1I7Q457;A0A1D5QPZ8;A0A1D5R6Z2	H9FUP6_MACMU S-methyl-5-thioadenosine phosphorylase OS=Macaca mulatta OX=9544 GN=MTAP PE=2 SV=1;G7NFW3_MACMU S-methyl-5-thioadenosine phosphorylase OS=Macaca mulatta OX=9544 GN=MTAP PE=3 SV=1;F6RQM9_MACMU S-methyl-5-thioadenosine phosphorylase OS=Macaca	9	3	3	3	20.5	31.236	39510000	39084000	56033000		96103000
G7NS76	40S ribosomal protein S24	RPS24	G7NS76;G7MPY0;A0A1D5QBP0;F7GTX5;F7HD71;H9ZC45;H9H3Q1;F7GV47;F7GE84;F7GE80;A0A1D5QQ74;G7MNI2;F7H0L5;A0A1D5Q0L7	G7NS76_MACMU 40S ribosomal protein S24 OS=Macaca mulatta OX=9544 GN=RPS24 PE=2 SV=1;G7MPY0_MACMU 40S ribosomal protein S24 OS=Macaca mulatta OX=9544 GN=EGK_15173 PE=3 SV=1;A0A1D5QBP0_MACMU 40S ribosomal protein S24 OS=Macaca mulatta OX=9544 GN=LOC705327 PE	14	3	3	3	26.2	15.069	122150000	142230000	439290000	474990000	655870000	393320000	215090000	103490000	127770000
A0A1D5RIJ5	Uncharacterized protein	GMPS	A0A1D5RIJ5;F7EE95;A0A1D5QBQ1;G7MJG1	A0A1D5RIJ5_MACMU Uncharacterized protein OS=Macaca mulatta OX=9544 GN=GMPS PE=4 SV=1;F7EE95_MACMU Glutamine-hydrolyzing GMP synthase OS=Macaca mulatta OX=9544 GN=GMPS PE=2 SV=1;A0A1D5QBQ1_MACMU Uncharacterized protein OS=Macaca mulatta OX=9544 GN=GMPS PE=4	4	4	4	4	9.1	65.914			21950000	24520000	39747000
H9EZ93	Farnesyl pyrophosphate synthase isoform b (Fragment)	FDPS	H9EZ93;H9FG60;F7FI27;A0A1D5QBT1;H9YVT1;G7MDX3	H9EZ93_MACMU Farnesyl pyrophosphate synthase isoform b (Fragment) OS=Macaca mulatta OX=9544 GN=FDPS PE=2 SV=1;H9FG60_MACMU Farnesyl pyrophosphate synthase isoform a (Fragment) OS=Macaca mulatta OX=9544 GN=FDPS PE=2 SV=1;F7FI27_MACMU Uncharacterized protein	6	2	2	2	7.6	31.774				16063000	33214000
A0A1D5QBY1	Uncharacterized protein		A0A1D5QBY1;G7NCC3;F6WC35;F6ZYK2;H9F4A0;F6QDR5	A0A1D5QBY1_MACMU Uncharacterized protein OS=Macaca mulatta OX=9544 PE=4 SV=1;G7NCC3_MACMU ATP synthase subunit OS=Macaca mulatta OX=9544 GN=EGK_06954 PE=3 SV=1;F6WC35_MACMU ATP synthase subunit OS=Macaca mulatta OX=9544 GN=ATP5L PE=2 SV=1;F6ZYK2_MACMU ATP	6	4	4	4	60.5	8.4518	4640400000	5315400000	3456900000	4195400000	3808100000	4623600000	3875600000	4373800000	5607400000
A0A1D5QC04	Uncharacterized protein	PICALM	A0A1D5QC04;H9ZE42;H9G0D5;H9G0D4;H9ZE43;F7B1V4;H9ZE41;H9G0D3;F7B1Y0;F7B1X1;A0A1D5QDT7;A0A1D5QMS1	A0A1D5QC04_MACMU Uncharacterized protein OS=Macaca mulatta OX=9544 GN=PICALM PE=4 SV=1;H9ZE42_MACMU Phosphatidylinositol-binding clathrin assembly protein isoform 2 OS=Macaca mulatta OX=9544 GN=PICALM PE=2 SV=1;H9G0D5_MACMU Phosphatidylinositol-binding cla	12	4	4	4	7	62.617	108100000	235860000	237820000	142140000	246820000	122240000	215140000		112100000
A0A1D5QC07	Vacuolar protein sorting-associated protein 35	VPS35	A0A1D5QC07;I0FFY6;H9FBI3;A0A1D5Q1P9	A0A1D5QC07_MACMU Vacuolar protein sorting-associated protein 35 OS=Macaca mulatta OX=9544 GN=VPS35 PE=3 SV=1;I0FFY6_MACMU Vacuolar protein sorting-associated protein 35 OS=Macaca mulatta OX=9544 GN=VPS35 PE=2 SV=1;H9FBI3_MACMU Vacuolar protein sorting-asso	4	16	16	16	23	91.575	354490000	279330000	289120000	344950000	402330000	341660000	355600000	313180000	277940000
A0A1D5QC79	Uncharacterized protein	CHID1	A0A1D5QC79;I0FUE5;F6QEW6;F6QEE2	A0A1D5QC79_MACMU Uncharacterized protein OS=Macaca mulatta OX=9544 GN=CHID1 PE=3 SV=1;I0FUE5_MACMU Chitinase domain-containing protein 1 isoform a OS=Macaca mulatta OX=9544 GN=CHID1 PE=2 SV=1;F6QEW6_MACMU Chitinase domain-containing protein 1 isoform a OS=	4	2	2	2	7.2	41.668	29497000	26246000	28005000	34133000	35610000	32547000	24762000	20377000	24876000
A0A1D5RA72	Uncharacterized protein	APPL1	A0A1D5RA72;A0A1D5QC91;H9EQ29;A0A1D5RFG9;G7ML09	A0A1D5RA72_MACMU Uncharacterized protein OS=Macaca mulatta OX=9544 GN=APPL1 PE=4 SV=1;A0A1D5QC91_MACMU Uncharacterized protein OS=Macaca mulatta OX=9544 GN=APPL1 PE=4 SV=1;H9EQ29_MACMU DCC-interacting protein 13-alpha OS=Macaca mulatta OX=9544 GN=APPL1 PE=	5	3	3	3	6.6	75.519	77346000	53982000	60180000	64292000	42655000	58712000	44841000	42639000	56502000
F6PYG3	Uncharacterized protein	TPD52	F6PYG3;I0FLD4;F6PYF5;H9ERA6;G7MZM0;F6PYD6;F6Z4R8;A0A1D5QCF3	F6PYG3_MACMU Uncharacterized protein OS=Macaca mulatta OX=9544 GN=TPD52 PE=4 SV=2;I0FLD4_MACMU Tumor protein D52 isoform 3 OS=Macaca mulatta OX=9544 GN=TPD52 PE=2 SV=1;F6PYF5_MACMU Uncharacterized protein OS=Macaca mulatta OX=9544 GN=TPD52 PE=4 SV=2;H9ERA6	8	4	4	4	26.5	19.62	51672000	62542000	150000000	108070000	289450000	54395000
A0A1D5QCF6	Uncharacterized protein	ARIH1	A0A1D5QCF6;F7HBC9;H9FAM0;F7GQ51;H9Z7D8	A0A1D5QCF6_MACMU Uncharacterized protein OS=Macaca mulatta OX=9544 GN=ARIH1 PE=4 SV=1;F7HBC9_MACMU RBR-type E3 ubiquitin transferase OS=Macaca mulatta OX=9544 GN=ARIH1 PE=3 SV=2;H9FAM0_MACMU RBR-type E3 ubiquitin transferase (Fragment) OS=Macaca mulatta OX	5	1	1	1	8.4	17.632
A0A1D5QCI8	Uncharacterized protein	TMEM120A	A0A1D5QCI8;H9EZY3;F7GP53	A0A1D5QCI8_MACMU Uncharacterized protein OS=Macaca mulatta OX=9544 GN=TMEM120A PE=4 SV=1;H9EZY3_MACMU Transmembrane protein 120A (Fragment) OS=Macaca mulatta OX=9544 GN=TMEM120A PE=2 SV=1;F7GP53_MACMU Transmembrane protein 120A OS=Macaca mulatta OX=9544 GN	3	1	1	1	6.3	20.52
A0A1D5QCJ8	Uncharacterized protein	CAPN1	A0A1D5QCJ8;A0A1D5R9Z5;H9G0C4;G7NCF4;F6ZLR4	A0A1D5QCJ8_MACMU Uncharacterized protein OS=Macaca mulatta OX=9544 GN=CAPN1 PE=3 SV=1;A0A1D5R9Z5_MACMU Uncharacterized protein OS=Macaca mulatta OX=9544 GN=CAPN1 PE=3 SV=1;H9G0C4_MACMU Calpain-1 catalytic subunit OS=Macaca mulatta OX=9544 GN=CAPN1 PE=2 SV=	5	12	12	12	18.1	81.136	203930000	180400000	204810000	166200000	166290000	223420000	240220000	165630000	228100000
A0A1D5QCM8	Uncharacterized protein	PPM1A	A0A1D5QCM8;H9FWA5;A0A1D5R334;G7MY75;F7BNQ9;F6XBR4;A0A1D5QPR7	A0A1D5QCM8_MACMU Uncharacterized protein OS=Macaca mulatta OX=9544 GN=PPM1A PE=3 SV=1;H9FWA5_MACMU Protein phosphatase 1A isoform 2 OS=Macaca mulatta OX=9544 GN=PPM1A PE=2 SV=1;A0A1D5R334_MACMU Uncharacterized protein OS=Macaca mulatta OX=9544 GN=PPM1A PE=	7	5	4	5	17.5	42.447	60027000	42454000	63728000	65035000	57334000	54651000	57388000	70375000	70685000
H9F3I4	Cytochrome c oxidase subunit 5B, mitochondrial (Fragment)	COX5B	H9F3I4;F6TNM4;G7NCD3;F6XV50;A0A1D5QCV8	H9F3I4_MACMU Cytochrome c oxidase subunit 5B, mitochondrial (Fragment) OS=Macaca mulatta OX=9544 GN=COX5B PE=2 SV=1;F6TNM4_MACMU Uncharacterized protein OS=Macaca mulatta OX=9544 PE=4 SV=2;G7NCD3_MACMU Uncharacterized protein (Fragment) OS=Macaca mulatta O	5	6	6	6	37.6	11.099	5064900000	5283500000	3236800000	3518100000	4467100000	4950400000	5061000000	6051000000	6300800000
A0A1D5QD17	Acyl-CoA-binding protein isoform 3	DBI	A0A1D5QD17;F7HHM2;Q3I226;A0A1D5QGH2;F6TS20;H9EY71;I2CTF6;H9EY73	A0A1D5QD17_MACMU Acyl-CoA-binding protein isoform 3 OS=Macaca mulatta OX=9544 GN=DBI PE=2 SV=1;F7HHM2_MACMU Uncharacterized protein OS=Macaca mulatta OX=9544 GN=DBI PE=4 SV=1;Q3I226_MACMU Diazepam-binding protein (Fragment) OS=Macaca mulatta OX=9544 GN=DBI	8	2	2	2	34.5	10.039	112440000	136210000	119600000	141890000	243180000	42429000	125600000	159630000	90127000
A0A1D5QD20	Uncharacterized protein	VWF	A0A1D5QD20;F6WF14;F5XVB6;A0A1D5R0L5;Q7YRS0;H9FET4	A0A1D5QD20_MACMU Uncharacterized protein OS=Macaca mulatta OX=9544 GN=VWF PE=4 SV=1;F6WF14_MACMU Uncharacterized protein OS=Macaca mulatta OX=9544 GN=VWF PE=4 SV=2;F5XVB6_MACMU von Willebrand factor OS=Macaca mulatta OX=9544 GN=VWF PE=2 SV=1;A0A1D5R0L5_MAC	6	4	3	4	2.3	306.39	79627000	90892000					55359000	50327000	38690000
A0A1D5RFN3	Uncharacterized protein	MACF1	A0A1D5RFN3;A0A1D5R2C3;A0A1D5QD28;H9F7C6;F6X558;G7MFZ2;F6X585	A0A1D5RFN3_MACMU Uncharacterized protein OS=Macaca mulatta OX=9544 GN=MACF1 PE=4 SV=1;A0A1D5R2C3_MACMU Uncharacterized protein OS=Macaca mulatta OX=9544 GN=MACF1 PE=4 SV=1;A0A1D5QD28_MACMU Uncharacterized protein OS=Macaca mulatta OX=9544 GN=MACF1 PE=4 SV=	7	3	1	2	0.4	834.82	572760000	635750000	299800000	497200000		532670000	656930000	638190000	542700000
F6T6C2	Uncharacterized protein	MYBPC3	F6T6C2;A0A1D5QD54	F6T6C2_MACMU Uncharacterized protein OS=Macaca mulatta OX=9544 GN=MYBPC3 PE=4 SV=2;A0A1D5QD54_MACMU Uncharacterized protein OS=Macaca mulatta OX=9544 GN=MYBPC3 PE=4 SV=1	2	84	5	84	72.5	140.67	69975000000	72977000000	43541000000	59498000000	52073000000	67650000000	75423000000	85482000000	75607000000
A0A1D5QD61	Uncharacterized protein	RPL28	A0A1D5QD61;A0A1D5QZE5;F7C6E1;F7ATJ0;A0A1D5R727;A0A1D5R540;G7NNU1	A0A1D5QD61_MACMU Uncharacterized protein OS=Macaca mulatta OX=9544 GN=RPL28 PE=4 SV=1;A0A1D5QZE5_MACMU Uncharacterized protein OS=Macaca mulatta OX=9544 GN=RPL28 PE=4 SV=1;F7C6E1_MACMU 60S ribosomal protein L28 isoform 2 OS=Macaca mulatta OX=9544 GN=RPL28	7	5	5	5	66.7	7.888	153590000	235320000	407850000	486750000	750340000	308970000	296130000	128580000	168390000
A0A1D5QD80	Uncharacterized protein	DRG1	A0A1D5QD80;G7N3N0;F6TF39	A0A1D5QD80_MACMU Uncharacterized protein OS=Macaca mulatta OX=9544 GN=DRG1 PE=4 SV=1;G7N3N0_MACMU Uncharacterized protein OS=Macaca mulatta OX=9544 GN=EGK_02958 PE=4 SV=1;F6TF39_MACMU Developmentally-regulated GTP-binding protein 1 OS=Macaca mulatta OX=954	3	1	1	1	3.9	39.647					42556000
A0A1D5QD86	Uncharacterized protein	SSBP1	A0A1D5QD86;F6X3C0	A0A1D5QD86_MACMU Uncharacterized protein OS=Macaca mulatta OX=9544 GN=SSBP1 PE=3 SV=1;F6X3C0_MACMU Single-stranded DNA-binding protein, mitochondrial OS=Macaca mulatta OX=9544 GN=SSBP1 PE=2 SV=1	2	7	7	7	53.1	16.767	768810000	777270000	637860000	829390000	711640000	902580000	593620000	676420000	697440000
A0A1D5QD91	ATP synthase subunit alpha	ATP5F1A	A0A1D5QD91;F7ETD0;A0A1D5QP41;A0A1D5RBN7;A0A1D5QZ25	A0A1D5QD91_MACMU ATP synthase subunit alpha OS=Macaca mulatta OX=9544 GN=ATP5F1A PE=3 SV=1;F7ETD0_MACMU ATP synthase subunit alpha OS=Macaca mulatta OX=9544 GN=ATP5F1A PE=2 SV=1;A0A1D5QP41_MACMU ATP synthase subunit alpha OS=Macaca mulatta OX=9544 GN=ATP5F	5	35	27	35	63.3	58.317	95522000000	90104000000	59536000000	80322000000	71635000000	92000000000	89505000000	97008000000	98745000000
A0A1D5QFR2	Uncharacterized protein	EPS15L1	A0A1D5QFR2;A0A1D5QDB0;F6SR49;G7NMP3;A0A1D5R7A3	A0A1D5QFR2_MACMU Uncharacterized protein OS=Macaca mulatta OX=9544 GN=EPS15L1 PE=4 SV=1;A0A1D5QDB0_MACMU Uncharacterized protein OS=Macaca mulatta OX=9544 GN=EPS15L1 PE=4 SV=1;F6SR49_MACMU Epidermal growth factor receptor substrate 15-like 1 OS=Macaca mula	5	3	3	3	4.6	83.248					11775000
A0A1D5QDB6	Uncharacterized protein	PDLIM7	A0A1D5QDB6;F7EPE5;F7EPF0;I0FWE5;G7MUG3;H9F216;F7EPD7;I0FWE6;A0A1D5QNM0;F6QFP6	A0A1D5QDB6_MACMU Uncharacterized protein OS=Macaca mulatta OX=9544 GN=PDLIM7 PE=4 SV=1;F7EPE5_MACMU Uncharacterized protein OS=Macaca mulatta OX=9544 GN=PDLIM7 PE=4 SV=2;F7EPF0_MACMU Uncharacterized protein OS=Macaca mulatta OX=9544 GN=PDLIM7 PE=4 SV=2;I0F	10	2	2	2	5.9	46.567	14631000	7656400	81172000	10524000	10598000		9363700		8959300
A0A1D5QDC2	Uncharacterized protein	TNS1	A0A1D5QDC2;F6PZF5;A0A1D5Q4E4;A0A1D5RDD1	A0A1D5QDC2_MACMU Uncharacterized protein OS=Macaca mulatta OX=9544 GN=TNS1 PE=4 SV=1;F6PZF5_MACMU Uncharacterized protein OS=Macaca mulatta OX=9544 GN=TNS1 PE=4 SV=2;A0A1D5Q4E4_MACMU Uncharacterized protein OS=Macaca mulatta OX=9544 GN=TNS1 PE=4 SV=1;A0A1D	4	30	1	30	27.2	184.02	780780000	806850000	959920000	671530000	521980000	569760000	1032700000	859530000	698740000
F7DUH0	Uncharacterized protein	CPSF7	F7DUH0;A0A1D5QK95;G7ND16;A0A1D5QDE6	F7DUH0_MACMU Uncharacterized protein OS=Macaca mulatta OX=9544 GN=CPSF7 PE=4 SV=2;A0A1D5QK95_MACMU Uncharacterized protein OS=Macaca mulatta OX=9544 GN=CPSF7 PE=4 SV=1;G7ND16_MACMU Cleavage and polyadenylation specificity factor 59 kDa subunit OS=Macaca mu	4	3	3	3	9.7	51.095			17845000	15945000	29117000
A0A1D5QDG3	Uncharacterized protein	GALK2	A0A1D5QDG3;A0A1D5R7N5;H9EVV6;F7G430;G7MX98;F7A7E8	A0A1D5QDG3_MACMU Uncharacterized protein OS=Macaca mulatta OX=9544 GN=GALK2 PE=4 SV=1;A0A1D5R7N5_MACMU Uncharacterized protein OS=Macaca mulatta OX=9544 GN=GALK2 PE=4 SV=1;H9EVV6_MACMU N-acetylgalactosamine kinase isoform 2 OS=Macaca mulatta OX=9544 GN=GAL	6	1	1	1	9.3	17.854
A0A1D5QP00	Uncharacterized protein	LGALS3BP	A0A1D5QP00;A0A1D5QDP6;H9FUB4;G7NH09;F7CNK6	A0A1D5QP00_MACMU Uncharacterized protein OS=Macaca mulatta OX=9544 GN=LGALS3BP PE=4 SV=1;A0A1D5QDP6_MACMU Uncharacterized protein OS=Macaca mulatta OX=9544 GN=LGALS3BP PE=4 SV=1;H9FUB4_MACMU Galectin-3-binding protein OS=Macaca mulatta OX=9544 GN=LGALS3BP	5	1	1	1	8.4	14.049			80358000		15995000				7167000
H9F8H8	Proteasome subunit beta (Fragment)	PSMB6	H9F8H8;G7NI33;F7HR46;A0A1D5QDQ9;Q3YAI3	H9F8H8_MACMU Proteasome subunit beta (Fragment) OS=Macaca mulatta OX=9544 GN=PSMB6 PE=2 SV=1;G7NI33_MACMU Proteasome subunit beta OS=Macaca mulatta OX=9544 GN=EGK_08055 PE=3 SV=1;F7HR46_MACMU Proteasome subunit beta OS=Macaca mulatta OX=9544 GN=PSMB6 PE=3	5	5	5	5	36.2	23.417	195210000	224830000	229230000	229280000	272600000	234840000	186900000	252110000	206620000
F7C465	Uncharacterized protein	MAGOHB	F7C465;A0A1D5QDR0;H9FBE6;H9FUG1;H9FUG0;I2CXA5;H9Z116;G7N653;F6SDF6;F7C473;A0A1D5QUY9;F6SCV7;G7MYI1	F7C465_MACMU Uncharacterized protein OS=Macaca mulatta OX=9544 GN=MAGOHB PE=4 SV=2;A0A1D5QDR0_MACMU Uncharacterized protein OS=Macaca mulatta OX=9544 GN=MAGOH PE=4 SV=1;H9FBE6_MACMU Protein mago nashi homolog 2 (Fragment) OS=Macaca mulatta OX=9544 GN=MAGOH	13	3	3	3	38.2	11.799		29161000	54301000	47272000	78098000	41659000	33774000	31775000
A0A1D5QPI6	Uncharacterized protein	GFAP	A0A1D5QPI6;F6ZNF3;I2CYK0;A0A1D5QDR4;I2CYJ9	A0A1D5QPI6_MACMU Uncharacterized protein OS=Macaca mulatta OX=9544 GN=GFAP PE=3 SV=1;F6ZNF3_MACMU Uncharacterized protein OS=Macaca mulatta OX=9544 GN=GFAP PE=3 SV=2;I2CYK0_MACMU Glial fibrillary acidic protein isoform 2 OS=Macaca mulatta OX=9544 GN=GFAP P	5	1	1	1	4.4	28.453
H9F0X7	Eukaryotic translation initiation factor 3 subunit A (Fragment)	EIF3A	H9F0X7;A0A1D5QDU0;F7EKN1	H9F0X7_MACMU Eukaryotic translation initiation factor 3 subunit A (Fragment) OS=Macaca mulatta OX=9544 GN=EIF3A PE=2 SV=1;A0A1D5QDU0_MACMU Eukaryotic translation initiation factor 3 subunit A OS=Macaca mulatta OX=9544 GN=EIF3A PE=3 SV=1;F7EKN1_MACMU Eukary	3	15	15	15	18.5	129.66	155830000	206940000	214180000	258650000	348790000	206210000	278820000	192360000	185030000
A0A1D5QDU1	Protein LYRIC	MTDH	A0A1D5QDU1;A0A1D5QP07;F7DD48;G7MZT8	A0A1D5QDU1_MACMU Protein LYRIC OS=Macaca mulatta OX=9544 GN=MTDH PE=2 SV=1;A0A1D5QP07_MACMU Uncharacterized protein OS=Macaca mulatta OX=9544 GN=MTDH PE=4 SV=1;F7DD48_MACMU Uncharacterized protein OS=Macaca mulatta OX=9544 GN=MTDH PE=4 SV=2;G7MZT8_MACMU Ly	4	2	2	2	4.6	63.854								125410000	244110000
F7FMM5	Uncharacterized protein	RO60	F7FMM5;A0A1D5QDY1;H9ZCS7;G7MF11	F7FMM5_MACMU Uncharacterized protein OS=Macaca mulatta OX=9544 GN=RO60 PE=4 SV=2;A0A1D5QDY1_MACMU Uncharacterized protein OS=Macaca mulatta OX=9544 GN=RO60 PE=4 SV=1;H9ZCS7_MACMU 60 kDa SS-A/Ro ribonucleoprotein isoform 2 OS=Macaca mulatta OX=9544 GN=TROVE	4	1	1	1	2.5	58.335	19898000	18346000	30981000	31867000	23910000	23706000	49621000	20159000	20328000
A0A1D5QDZ5	Uncharacterized protein	TRIR	A0A1D5QDZ5;F7H2V4;A0A1D5Q3L6;G7NLB0	A0A1D5QDZ5_MACMU Uncharacterized protein OS=Macaca mulatta OX=9544 GN=TRIR PE=4 SV=1;F7H2V4_MACMU Uncharacterized protein OS=Macaca mulatta OX=9544 GN=TRIR PE=2 SV=1;A0A1D5Q3L6_MACMU Uncharacterized protein OS=Macaca mulatta OX=9544 GN=TRIR PE=4 SV=1;G7NLB	4	2	2	2	22.4	17.952					48437000
A0A1D5QE69	Uncharacterized protein	DDX5	A0A1D5QE69;H9FQP4;G7NJ98;F7A985;A0A1D5Q3P1;A0A1D5RFW7;A0A1D5RG83	A0A1D5QE69_MACMU Uncharacterized protein OS=Macaca mulatta OX=9544 GN=DDX5 PE=3 SV=1;H9FQP4_MACMU Putative ATP-dependent RNA helicase DDX5 OS=Macaca mulatta OX=9544 GN=DDX5 PE=2 SV=1;G7NJ98_MACMU Uncharacterized protein OS=Macaca mulatta OX=9544 GN=EGK_088	7	13	9	13	31.8	64.382	87271000	140110000	593090000	745380000	918330000	322120000	153740000	117210000	82768000
I0FTI7	Proteasome subunit alpha type	PSMA5	I0FTI7;A0A1D5QEC6;F6VLE9	I0FTI7_MACMU Proteasome subunit alpha type OS=Macaca mulatta OX=9544 GN=PSMA5 PE=2 SV=1;A0A1D5QEC6_MACMU Proteasome endopeptidase complex OS=Macaca mulatta OX=9544 GN=PSMA5 PE=3 SV=1;F6VLE9_MACMU Proteasome subunit alpha type OS=Macaca mulatta OX=9544 GN=P	3	6	6	6	38.2	26.411	273500000	258720000	343540000	338100000	498040000	334250000	218120000	244620000	264390000
A0A1D5QM04	Serine/threonine-protein phosphatase	PPP6C	A0A1D5QM04;G7NER0;A0A1D5QED9;F7D2A2	A0A1D5QM04_MACMU Serine/threonine-protein phosphatase OS=Macaca mulatta OX=9544 GN=PPP6C PE=3 SV=1;G7NER0_MACMU Serine/threonine-protein phosphatase OS=Macaca mulatta OX=9544 GN=EGK_07880 PE=3 SV=1;A0A1D5QED9_MACMU Serine/threonine-protein phosphatase OS=M	4	2	2	2	11.3	32.532					49409000		19363000		20710000
F7CBG9	Uncharacterized protein	ADA	F7CBG9;H9YV62;H9EX25;F7AJ20;A0A1D5QJ27;A0A1D5QEF0	F7CBG9_MACMU Uncharacterized protein OS=Macaca mulatta OX=9544 GN=ADA PE=4 SV=2;H9YV62_MACMU Adenosine deaminase OS=Macaca mulatta OX=9544 GN=ADA PE=2 SV=1;H9EX25_MACMU Adenosine deaminase OS=Macaca mulatta OX=9544 GN=ADA PE=2 SV=1;F7AJ20_MACMU Uncharacter	6	2	2	2	12.4	38.42		22000000
A0A1D5QEF4	Uncharacterized protein	SH3BP5L	A0A1D5QEF4;F6Y0K6;A0A1D5R808	A0A1D5QEF4_MACMU Uncharacterized protein OS=Macaca mulatta OX=9544 GN=SH3BP5L PE=4 SV=1;F6Y0K6_MACMU SH3 domain-binding protein 5-like OS=Macaca mulatta OX=9544 GN=SH3BP5L PE=2 SV=1;A0A1D5R808_MACMU Uncharacterized protein OS=Macaca mulatta OX=9544 GN=SH3B	3	1	1	1	3.1	42.809	276520000	322300000	210300000	426950000	408710000	301920000	267280000	416180000	442790000
A0A1D5QEH0	Uncharacterized protein	SERBP1	A0A1D5QEH0;F6WZG6;G7MHJ1;H9F194;H9F193;H9FAN2;H9FAN1	A0A1D5QEH0_MACMU Uncharacterized protein OS=Macaca mulatta OX=9544 GN=SERBP1 PE=4 SV=1;F6WZG6_MACMU Uncharacterized protein OS=Macaca mulatta OX=9544 GN=SERBP1 PE=4 SV=2;G7MHJ1_MACMU Uncharacterized protein OS=Macaca mulatta OX=9544 GN=EGK_00864 PE=4 SV=1;	7	10	10	10	28.9	39.835	93215000	363680000	732660000	1044300000	904480000	600580000	339530000	292960000	243390000
F6QFU0	Uncharacterized protein	NDUFB2	F6QFU0;A0A1D5QEI2;G7MMP6;F6QFW1	F6QFU0_MACMU Uncharacterized protein OS=Macaca mulatta OX=9544 GN=NDUFB2 PE=4 SV=2;A0A1D5QEI2_MACMU Uncharacterized protein OS=Macaca mulatta OX=9544 GN=NDUFB2 PE=4 SV=1;G7MMP6_MACMU Uncharacterized protein OS=Macaca mulatta OX=9544 GN=EGK_14203 PE=4 SV=1;	4	2	2	2	51.3	9.4213	338030000	364650000	186000000	292230000	260060000	195360000	328830000	322060000	308540000
F6PPA4	Uncharacterized protein	COL15A1	F6PPA4;A0A1D5QEI9;G7NEY3;I0FPA1;F6PP96	F6PPA4_MACMU Uncharacterized protein OS=Macaca mulatta OX=9544 GN=COL15A1 PE=4 SV=2;A0A1D5QEI9_MACMU Uncharacterized protein OS=Macaca mulatta OX=9544 GN=COL15A1 PE=4 SV=1;G7NEY3_MACMU Collagen alpha-1(XV) chain (Fragment) OS=Macaca mulatta OX=9544 GN=EGK_	5	13	13	13	11.9	140.29	602190000	557680000	614790000	487850000	431520000	598810000	420020000	449330000	558470000
A0A1D5R1Y8	Uncharacterized protein	SLC2A1	A0A1D5R1Y8;G7MGD6;F6YFI2;A0A1D5QKV8;A0A1D5QEL7	A0A1D5R1Y8_MACMU Uncharacterized protein OS=Macaca mulatta OX=9544 GN=SLC2A1 PE=3 SV=1;G7MGD6_MACMU Uncharacterized protein OS=Macaca mulatta OX=9544 GN=EGK_00649 PE=3 SV=1;F6YFI2_MACMU Solute carrier family 2, facilitated glucose transporter member 1 OS=M	5	4	4	4	7.6	51.141		17002000	40107000	48579000	92549000	26069000
F6ZBG5	Uncharacterized protein	ACOT9	F6ZBG5;A0A1D5QEQ6;F6ZBF7;G7NSP3;A0A1D5QBL8	F6ZBG5_MACMU Uncharacterized protein OS=Macaca mulatta OX=9544 GN=ACOT9 PE=4 SV=2;A0A1D5QEQ6_MACMU Uncharacterized protein OS=Macaca mulatta OX=9544 GN=ACOT9 PE=4 SV=1;F6ZBF7_MACMU Uncharacterized protein OS=Macaca mulatta OX=9544 GN=ACOT9 PE=4 SV=2;G7NSP3	5	16	16	16	41.7	50.295	500250000	454860000	416660000	306890000	434360000	509390000	691960000	719500000	353780000
F7F8A3	Uncharacterized protein	TMX3	F7F8A3;A0A1D5QES2	F7F8A3_MACMU Uncharacterized protein OS=Macaca mulatta OX=9544 GN=TMX3 PE=4 SV=2;A0A1D5QES2_MACMU Uncharacterized protein OS=Macaca mulatta OX=9544 GN=TMX3 PE=4 SV=1	2	1	1	1	3	50.178
A0A1D5QES3	Protein transport protein SEC23	SEC23A	A0A1D5QES3;I0FK19;F7EJF0;A0A1D5RCV3;F6SFU7;F6T935;F6T944;G7N322	A0A1D5QES3_MACMU Protein transport protein SEC23 OS=Macaca mulatta OX=9544 GN=SEC23A PE=3 SV=1;I0FK19_MACMU Protein transport protein SEC23 OS=Macaca mulatta OX=9544 GN=SEC23A PE=2 SV=1;F7EJF0_MACMU Protein transport protein SEC23 OS=Macaca mulatta OX=9544	8	4	4	4	6.4	82.954	39852000	39567000	161260000	62498000	75749000	45973000	53963000	46150000	132440000
H9EP87	Splicing factor 3B subunit 1 isoform 1	SF3B1	H9EP87;G7N8K3;F6X4D3;A0A1D5QES7	H9EP87_MACMU Splicing factor 3B subunit 1 isoform 1 OS=Macaca mulatta OX=9544 GN=SF3B1 PE=2 SV=1;G7N8K3_MACMU Splicing factor 3B subunit 1 isoform 1 OS=Macaca mulatta OX=9544 GN=SF3B1 PE=2 SV=1;F6X4D3_MACMU Uncharacterized protein OS=Macaca mulatta OX=9544	4	7	7	7	7.3	145.82	17729000	25684000	65710000	60007000	190640000	33479000	31600000		15147000
G7MUH4	Uncharacterized protein (Fragment)	EGK_17210	G7MUH4;A0A1D5QEU0;F6XXY6;I0FHG3;F6XXZ7;A0A1D5RIL1;H9YVR7;F7G7Z3	G7MUH4_MACMU Uncharacterized protein (Fragment) OS=Macaca mulatta OX=9544 GN=EGK_17210 PE=4 SV=1;A0A1D5QEU0_MACMU Uncharacterized protein OS=Macaca mulatta OX=9544 GN=HNRNPAB PE=4 SV=1;F6XXY6_MACMU Uncharacterized protein OS=Macaca mulatta OX=9544 GN=HNRNP	8	4	4	4	22.1	29.432	139540000	166490000	55898000	291050000	356840000	120770000	157430000	135580000
A0A1D5QEW5	Uncharacterized protein	MEMO1	A0A1D5QEW5;F6ZV63;H9EQ09;F6Y3G0	A0A1D5QEW5_MACMU Uncharacterized protein OS=Macaca mulatta OX=9544 GN=MEMO1 PE=3 SV=1;F6ZV63_MACMU Uncharacterized protein OS=Macaca mulatta OX=9544 GN=MEMO1 PE=3 SV=2;H9EQ09_MACMU Protein MEMO1 isoform 1 OS=Macaca mulatta OX=9544 GN=MEMO1 PE=2 SV=1;F6Y3G0	4	1	1	1	6.9	31.307				10364000	18051000
G7MI82	Importin subunit alpha	EGK_00497	G7MI82;F7GNW5;H9EN17;A0A1D5QJS1;A0A1D5QEX3;F6UVJ8;A0A1D5QVJ1;G7MQN5;H9EPP2	G7MI82_MACMU Importin subunit alpha OS=Macaca mulatta OX=9544 GN=EGK_00497 PE=3 SV=1;F7GNW5_MACMU Importin subunit alpha OS=Macaca mulatta OX=9544 GN=KPNA6 PE=3 SV=2;H9EN17_MACMU Importin subunit alpha OS=Macaca mulatta OX=9544 GN=KPNA6 PE=2 SV=1;A0A1D5QJS	9	3	3	3	8.1	55.044	15039000		9803800		20448000
A0A1D5QEZ4	Uncharacterized protein	NACA	A0A1D5QEZ4;A0A1D5QML8;A0A1D5QI31;F6U241;I0FLY8;F7E144	A0A1D5QEZ4_MACMU Uncharacterized protein OS=Macaca mulatta OX=9544 GN=NACA PE=4 SV=1	6	28	28	28	24.6	181.29	439210000	535210000	457220000	568040000	600770000	529430000	501140000	614440000	459250000
F6YE32	Uncharacterized protein	SCP2	F6YE32;A0A1D5QEZ7;I0FU33;G7MH13;F7C7P2;A0A1D5RDT5;H9F096;F6YDD6	F6YE32_MACMU Uncharacterized protein OS=Macaca mulatta OX=9544 GN=SCP2 PE=3 SV=2;A0A1D5QEZ7_MACMU Uncharacterized protein OS=Macaca mulatta OX=9544 GN=SCP2 PE=3 SV=1;I0FU33_MACMU Non-specific lipid-transfer protein isoform 1 proprotein OS=Macaca mulatta OX	8	6	6	6	11.5	54.323	113410000	104480000	109400000	147730000	133060000	131590000	124910000	162480000	147400000
F7BMX8	Uncharacterized protein	MTHFD1	F7BMX8;H9FUP9;F7BVD9;F7BGW5;A0A1D5QF17;A0A1D5RBZ4	F7BMX8_MACMU Uncharacterized protein OS=Macaca mulatta OX=9544 GN=MTHFD1 PE=3 SV=2;H9FUP9_MACMU C-1-tetrahydrofolate synthase, cytoplasmic OS=Macaca mulatta OX=9544 GN=MTHFD1 PE=2 SV=1;F7BVD9_MACMU Uncharacterized protein OS=Macaca mulatta OX=9544 GN=MTHFD	6	6	6	6	9.6	101.01		46410000	82321000	76332000	135150000	42798000	61806000	47313000	48531000
G7NR53	Glycine cleavage system H protein (Fragment)	EGK_13039	G7NR53;F6XPM0;F7H382;H9Z1W8;H9EX70;A0A1D5QF29	G7NR53_MACMU Glycine cleavage system H protein (Fragment) OS=Macaca mulatta OX=9544 GN=EGK_13039 PE=3 SV=1;F6XPM0_MACMU Uncharacterized protein OS=Macaca mulatta OX=9544 PE=4 SV=2;F7H382_MACMU Glycine cleavage system H protein OS=Macaca mulatta OX=9544 PE=	6	1	1	1	16.1	13.74	114910000	149040000	103580000	117370000	130510000	139500000	96748000	95039000	134710000
A0A1D5RI78	Uncharacterized protein	MYO18A	A0A1D5RI78;H9ETW9;F6RJB0;F6RJC7;F6RJH8;H9ETY4;G7NGR7;A0A1D5QF42	A0A1D5RI78_MACMU Uncharacterized protein OS=Macaca mulatta OX=9544 GN=MYO18A PE=3 SV=1;H9ETW9_MACMU Myosin-XVIIIa isoform b OS=Macaca mulatta OX=9544 GN=MYO18A PE=2 SV=1;F6RJB0_MACMU Uncharacterized protein OS=Macaca mulatta OX=9544 GN=MYO18A PE=3 SV=2;F6R	8	3	3	3	1.9	225.23	702400000	238790000	545090000	210620000	188520000	245080000	261680000	293150000	258380000
F7D2B2	Uncharacterized protein	MRPL9	F7D2B2;H9F3T8;F7EDQ0;A0A1D5QF55	F7D2B2_MACMU Uncharacterized protein OS=Macaca mulatta OX=9544 GN=MRPL9 PE=4 SV=1;H9F3T8_MACMU 39S ribosomal protein L9, mitochondrial (Fragment) OS=Macaca mulatta OX=9544 GN=MRPL9 PE=2 SV=1;F7EDQ0_MACMU 39S ribosomal protein L9, mitochondrial OS=Macaca mu	4	3	3	3	12	26.261	87691000	76861000	66618000	82869000	80476000	93765000	115930000	108490000	111500000
A0A1D5QF56	40S ribosomal protein S5	RPS5	A0A1D5QF56;F7E0S7;F7HNZ0;A0A1D5QGE5;H9FBS9;G7MZM1;A0A1D5RGM6	A0A1D5QF56_MACMU 40S ribosomal protein S5 OS=Macaca mulatta OX=9544 GN=RPS5 PE=2 SV=1;F7E0S7_MACMU Uncharacterized protein OS=Macaca mulatta OX=9544 GN=RPS5 PE=3 SV=1;F7HNZ0_MACMU Uncharacterized protein OS=Macaca mulatta OX=9544 GN=RPS5 PE=3 SV=2	7	9	9	9	47.5	22.876	204230000	251890000	630730000	402360000	655990000	337230000	303520000	208240000	180110000
F6SK73	Phosphorylase b kinase regulatory subunit	PHKA1	F6SK73;H9F6V2;H9F6W3;F6SK82;A0A1D5QF82;A0A1D5RIB6;G7NS43	F6SK73_MACMU Phosphorylase b kinase regulatory subunit OS=Macaca mulatta OX=9544 GN=PHKA1 PE=3 SV=2;H9F6V2_MACMU Phosphorylase b kinase regulatory subunit (Fragment) OS=Macaca mulatta OX=9544 GN=PHKA1 PE=2 SV=1;H9F6W3_MACMU Phosphorylase b kinase regulator	7	2	2	2	1.6	129.23	355720000		182500000	253570000	285340000	239180000	45026000	178850000	413500000
A0A1D5QF95	26S proteasome non-ATPase regulatory subunit 14	PSMD14	A0A1D5QF95;F7HMX1;A0A1D5QXS8;A0A1D5Q405	A0A1D5QF95_MACMU 26S proteasome non-ATPase regulatory subunit 14 OS=Macaca mulatta OX=9544 GN=PSMD14 PE=2 SV=1;F7HMX1_MACMU Uncharacterized protein OS=Macaca mulatta OX=9544 GN=PSMD14 PE=4 SV=2;A0A1D5QXS8_MACMU Uncharacterized protein OS=Macaca mulatta OX=	4	4	4	4	25.8	34.577	75782000	120500000	168080000	157350000	174140000	117010000	125000000	95749000	83192000
H9EP48	Synaptogyrin	SYNGR3	H9EP48;A0A1D5QFI2	H9EP48_MACMU Synaptogyrin OS=Macaca mulatta OX=9544 GN=SYNGR3 PE=2 SV=1;A0A1D5QFI2_MACMU Synaptogyrin OS=Macaca mulatta OX=9544 GN=SYNGR3 PE=3 SV=1	2	1	1	1	6.6	24.525
A0A1D5QFM6	Uncharacterized protein	BCKDHB	A0A1D5QFM6;A0A1D5RBS8;F6QJG4;H9F779;G7MPT0	A0A1D5QFM6_MACMU Uncharacterized protein OS=Macaca mulatta OX=9544 GN=BCKDHB PE=4 SV=1;A0A1D5RBS8_MACMU Uncharacterized protein OS=Macaca mulatta OX=9544 GN=BCKDHB PE=4 SV=1;F6QJG4_MACMU Uncharacterized protein OS=Macaca mulatta OX=9544 GN=BCKDHB PE=4 SV=2	5	1	1	1	7.8	23.687	71743000	76314000	57118000	60567000	57778000	55050000	101950000	174900000	67207000
A0A1D5QFN7	Pyruvate dehydrogenase E1 component subunit beta	PDHB	A0A1D5QFN7;A0A1D5QCP9;F6R4J1;F7H2D3;Q8HYN6	A0A1D5QFN7_MACMU Pyruvate dehydrogenase E1 component subunit beta OS=Macaca mulatta OX=9544 GN=PDHB PE=2 SV=1;A0A1D5QCP9_MACMU Pyruvate dehydrogenase E1 component subunit beta OS=Macaca mulatta OX=9544 GN=PDHB PE=4 SV=1;F6R4J1_MACMU Pyruvate dehydrogenase	5	17	17	17	60.4	39.263	11371000000	9998500000	7489900000	9057800000	8108300000	11513000000	10286000000	11107000000	10234000000
A0A1D5QFT4	Uncharacterized protein	SH3GL1	A0A1D5QFT4;H9ET78;G7NLX0;F6X299;F7HCC5;A0A1D5QW13;G7NFY7	A0A1D5QFT4_MACMU Uncharacterized protein OS=Macaca mulatta OX=9544 GN=SH3GL1 PE=4 SV=1;H9ET78_MACMU Endophilin-A2 isoform 1 OS=Macaca mulatta OX=9544 GN=SH3GL1 PE=2 SV=1;G7NLX0_MACMU Endophilin-2 OS=Macaca mulatta OX=9544 GN=EGK_09938 PE=4 SV=1;F6X299_MACM	7	2	2	2	6.6	40.778					46099000
A0A1D5QYS7	Uncharacterized protein		A0A1D5QYS7;G7MW72;A0A1D5RFV7;F6Y0P8;A0A1D5QFU7;H9EMG4;F6RKN5	A0A1D5QYS7_MACMU Uncharacterized protein OS=Macaca mulatta OX=9544 PE=4 SV=1;G7MW72_MACMU Ubiquitin-protein ligase E3A OS=Macaca mulatta OX=9544 GN=EGK_17276 PE=4 SV=1;A0A1D5RFV7_MACMU Uncharacterized protein OS=Macaca mulatta OX=9544 GN=UBE3A PE=4 SV=1;F6	7	1	1	1	1.8	81.163
A0A1D5QFV4	Protein phosphatase methylesterase 1	PPME1	A0A1D5QFV4;F7HS20;H9EPW0;G7NEB3;A0A1D5RGC1	A0A1D5QFV4_MACMU Protein phosphatase methylesterase 1 OS=Macaca mulatta OX=9544 GN=PPME1 PE=3 SV=1;F7HS20_MACMU Protein phosphatase methylesterase 1 OS=Macaca mulatta OX=9544 GN=PPME1 PE=3 SV=2;H9EPW0_MACMU Protein phosphatase methylesterase 1 OS=Macaca mu	5	4	4	4	11.8	37.506			17284000	15790000	24356000
H9FUW8	NHP2-like protein 1	NHP2L1	H9FUW8;A0A1D5QJW6;A0A1D5QFW7	H9FUW8_MACMU NHP2-like protein 1 OS=Macaca mulatta OX=9544 GN=NHP2L1 PE=2 SV=1;A0A1D5QJW6_MACMU Uncharacterized protein OS=Macaca mulatta OX=9544 GN=SNU13 PE=4 SV=1;A0A1D5QFW7_MACMU Uncharacterized protein OS=Macaca mulatta OX=9544 GN=SNU13 PE=4 SV=1	3	2	2	2	18.8	14.173			53444000	76784000	83418000
F6XWT0	Uncharacterized protein	UBE2L3	F6XWT0;A0A1D5QFY2;G7N3B9;A0A1D5R4N3;H9FZA6;A0A1D5QMI0;A0A1D5QQB8;F7EVY1;G7MVQ2;F6ZC17;F6S052	F6XWT0_MACMU Uncharacterized protein OS=Macaca mulatta OX=9544 GN=UBE2L3 PE=3 SV=2;A0A1D5QFY2_MACMU Uncharacterized protein OS=Macaca mulatta OX=9544 PE=3 SV=1;G7N3B9_MACMU Uncharacterized protein (Fragment) OS=Macaca mulatta OX=9544 GN=EGK_02828 PE=3 SV=1	11	3	3	3	37.7	14.121	172560000	210740000	202480000	196740000	214020000	106500000	112880000	130930000	149280000
A0A1D5QG02	Uncharacterized protein		A0A1D5QG02	A0A1D5QG02_MACMU Uncharacterized protein OS=Macaca mulatta OX=9544 PE=4 SV=1	1	5	1	1	18.3	47.057	58043000	14502000			17826000			26843000
F6T5R9	Ubiquitin carboxyl-terminal hydrolase	USP14	F6T5R9;A0A1D5RD35;H9FMR6;A0A1D5R4S7;F7AFL1;A0A1D5QG07	F6T5R9_MACMU Ubiquitin carboxyl-terminal hydrolase OS=Macaca mulatta OX=9544 GN=USP14 PE=3 SV=2;A0A1D5RD35_MACMU Ubiquitin carboxyl-terminal hydrolase OS=Macaca mulatta OX=9544 GN=USP14 PE=3 SV=1;H9FMR6_MACMU Ubiquitin carboxyl-terminal hydrolase OS=Macaca	6	9	9	9	21.1	50.697	75295000	77212000	82443000	105160000	192820000	79436000	51170000	91693000	70813000
H9FYB4	Protein SEC13 homolog isoform 1	SEC13	H9FYB4;A0A1D5QG24	H9FYB4_MACMU Protein SEC13 homolog isoform 1 OS=Macaca mulatta OX=9544 GN=SEC13 PE=2 SV=1;A0A1D5QG24_MACMU Uncharacterized protein OS=Macaca mulatta OX=9544 GN=SEC13 PE=3 SV=1	2	1	1	1	8.1	35.531		60027000			184500000		52916000
G7NLT5	Guanine nucleotide-binding protein subunit alpha-11	EGK_09894	G7NLT5;F7GZP9;A0A1D5QG31;H9F7Z3;H9FT55;G7NGD5;F7AQR3;A0A1D5Q3K4;H9FCM1;F7HQU9	G7NLT5_MACMU Guanine nucleotide-binding protein subunit alpha-11 OS=Macaca mulatta OX=9544 GN=EGK_09894 PE=4 SV=1;F7GZP9_MACMU Uncharacterized protein OS=Macaca mulatta OX=9544 GN=GNA11 PE=4 SV=2;A0A1D5QG31_MACMU Guanine nucleotide-binding protein subunit	10	6	6	6	16.4	42.081	118920000	90643000	81404000	91240000	102150000	91695000	113430000	112110000	75493000
A0A1D5R9U7	Uncharacterized protein	PSPC1	A0A1D5R9U7;F6XYT7;G7NJR2;F6UJ73;A0A1D5QG32;F6XYS7	A0A1D5R9U7_MACMU Uncharacterized protein OS=Macaca mulatta OX=9544 GN=PSPC1 PE=4 SV=1;F6XYT7_MACMU Uncharacterized protein OS=Macaca mulatta OX=9544 GN=PSPC1 PE=4 SV=2;G7NJR2_MACMU Paraspeckle protein 1 OS=Macaca mulatta OX=9544 GN=EGK_09159 PE=4 SV=1;F6UJ	6	4	4	4	17.6	43.348	12897000	28978000	23497000	19247000	42520000
F6XE81	Uncharacterized protein	COPS4	F6XE81;A0A1D5QG35;A0A1D5Q7W7;A0A1D5QC06	F6XE81_MACMU Uncharacterized protein OS=Macaca mulatta OX=9544 GN=COPS4 PE=4 SV=2;A0A1D5QG35_MACMU COP9 signalosome complex subunit 4 OS=Macaca mulatta OX=9544 GN=COPS4 PE=2 SV=1;A0A1D5Q7W7_MACMU Uncharacterized protein OS=Macaca mulatta OX=9544 GN=COPS4 P	4	7	7	7	25.9	45.137	91430000	83379000	64581000	105120000	97233000	68133000	83875000	78959000	97324000
A0A1D5QG74	Uncharacterized protein		A0A1D5QG74;F7GWN1;F7CKW1;F6ZHB5;A0A1D5RAB2;A0A1D5R5E2;A0A1D5QMX2;A0A1D5QHP4;G7NS91;A0A1D5QXY4;A0A1D5RC52	A0A1D5QG74_MACMU Uncharacterized protein OS=Macaca mulatta OX=9544 PE=4 SV=1;F7GWN1_MACMU Cytochrome c oxidase subunit 7C, mitochondrial OS=Macaca mulatta OX=9544 GN=COX7C PE=2 SV=1;F7CKW1_MACMU Uncharacterized protein OS=Macaca mulatta OX=9544 GN=LOC10042	11	2	2	2	32.1	6.4015	237270000	150790000	176520000	187980000	274950000	318940000	171300000	213540000	271400000
A0A1D5QSR8	Matrix Gla protein	MGP	A0A1D5QSR8;G7N6F0;A0A1D5QG79	A0A1D5QSR8_MACMU Matrix Gla protein OS=Macaca mulatta OX=9544 GN=MGP PE=3 SV=1;G7N6F0_MACMU Matrix Gla protein OS=Macaca mulatta OX=9544 GN=MGP PE=2 SV=1;A0A1D5QG79_MACMU Matrix Gla protein OS=Macaca mulatta OX=9544 GN=MGP PE=3 SV=1	3	1	1	1	11.2	11.793			48798000
H9EWI5	2-methoxy-6-polyprenyl-1,4-benzoquinol methylase, mitochondrial	COQ5	H9EWI5;G7N5Z1;A0A1D5QG92;F7BZ90;F7BZM2	H9EWI5_MACMU 2-methoxy-6-polyprenyl-1,4-benzoquinol methylase, mitochondrial OS=Macaca mulatta OX=9544 GN=COQ5 PE=2 SV=1;G7N5Z1_MACMU 2-methoxy-6-polyprenyl-1,4-benzoquinol methylase, mitochondrial OS=Macaca mulatta OX=9544 GN=COQ5 PE=3 SV=1;A0A1D5QG92_MAC	5	7	7	7	27.8	37.153	321580000	219250000	192330000	221530000	249180000	190370000	278600000	298030000	268180000
G7NEX3	Muscle-restricted coiled-coil protein	EGK_07493	G7NEX3;A0A1D5QG93	G7NEX3_MACMU Muscle-restricted coiled-coil protein OS=Macaca mulatta OX=9544 GN=EGK_07493 PE=4 SV=1;A0A1D5QG93_MACMU Uncharacterized protein OS=Macaca mulatta OX=9544 GN=CAVIN4 PE=4 SV=1	2	5	1	1	18.6	40.967	35369000	111220000	42503000	33683000	55886000	48118000	67550000	122330000	60861000
A0A1D5RI37	Uncharacterized protein	LOC716667	A0A1D5RI37;A0A1D5QGC0;A0A1D5Q8R4;A0A1D5RJU3	A0A1D5RI37_MACMU Uncharacterized protein OS=Macaca mulatta OX=9544 GN=LOC716667 PE=3 SV=1;A0A1D5QGC0_MACMU Uncharacterized protein OS=Macaca mulatta OX=9544 GN=LOC716667 PE=3 SV=1;A0A1D5Q8R4_MACMU Uncharacterized protein OS=Macaca mulatta OX=9544 GN=LOC716	4	11	1	1	15.4	62.735
F7H3V2	Uncharacterized protein	FLII	F7H3V2;A0A1D5QGH3;H9FRR8;A0A1D5R515;F7H3Q2;H9Z6R7;G7NJ28;A0A1D5RH73;A0A1D5R555;A0A1D5Q356	F7H3V2_MACMU Uncharacterized protein OS=Macaca mulatta OX=9544 GN=FLII PE=4 SV=2;A0A1D5QGH3_MACMU Uncharacterized protein OS=Macaca mulatta OX=9544 GN=FLII PE=4 SV=1;H9FRR8_MACMU Protein flightless-1 homolog OS=Macaca mulatta OX=9544 GN=FLII PE=2 SV=1;A0A1	10	7	7	7	6.9	138.48	20164000	17669000	26722000	18577000	21763000	17194000	43712000	22369000	11365000
G7MJ25	EPM2A-interacting protein 1	EPM2AIP1	G7MJ25;A0A1D5QGL5	G7MJ25_MACMU EPM2A-interacting protein 1 OS=Macaca mulatta OX=9544 GN=EPM2AIP1 PE=2 SV=1;A0A1D5QGL5_MACMU Uncharacterized protein OS=Macaca mulatta OX=9544 GN=EPM2AIP1 PE=4 SV=1	2	4	4	4	9.4	70.16	38932000	29380000	25753000	22526000	26583000		36714000	34130000	28473000
A0A1D5QGL9	Uncharacterized protein	SEPT9	A0A1D5QGL9;I2CTF1;A0A1D5RKX3;I0FNN2;H9EV03;A0A1D5RAF7;G7NGZ3;I0FNN1;H9H3R9;A0A1D5Q7N8;A0A1D5QXW3;A0A1D5Q2X1;A0A1D5Q3W7	A0A1D5QGL9_MACMU Uncharacterized protein OS=Macaca mulatta OX=9544 GN=SEPT9 PE=3 SV=1;I2CTF1_MACMU Septin-9 isoform c OS=Macaca mulatta OX=9544 GN=SEPT9 PE=2 SV=1;A0A1D5RKX3_MACMU Uncharacterized protein OS=Macaca mulatta OX=9544 GN=SEPT9 PE=3 SV=1;I0FNN2_	13	5	5	5	10.4	63.508	81046000	62893000	126180000	111920000	175950000	67464000	93896000	89392000	80437000
A0A1D5QGP4	Uncharacterized protein	ECHS1	A0A1D5QGP4;A0A1D5QJ11	A0A1D5QGP4_MACMU Uncharacterized protein OS=Macaca mulatta OX=9544 GN=ECHS1 PE=3 SV=1;A0A1D5QJ11_MACMU Uncharacterized protein OS=Macaca mulatta OX=9544 GN=ECHS1 PE=3 SV=1	2	16	1	1	60.7	31.611			177210000	271860000		320170000
A0A1D5QGS0	PDZ and LIM domain protein 3 isoform b	PDLIM3	A0A1D5QGS0;F6Q4Z5;A0A1D5RF04;F6Q4V6;A0A1D5QKD6	A0A1D5QGS0_MACMU PDZ and LIM domain protein 3 isoform b OS=Macaca mulatta OX=9544 GN=PDLIM3 PE=2 SV=1;F6Q4Z5_MACMU Uncharacterized protein OS=Macaca mulatta OX=9544 GN=PDLIM3 PE=4 SV=2;A0A1D5RF04_MACMU Uncharacterized protein OS=Macaca mulatta OX=9544 GN=P	5	4	4	4	24.1	34.265	76661000	70944000	98415000	102720000	112810000	79860000	86167000	118430000	58895000
A0A1D5QGT8	Uncharacterized protein	ANKRD50	A0A1D5QGT8	A0A1D5QGT8_MACMU Uncharacterized protein OS=Macaca mulatta OX=9544 GN=ANKRD50 PE=4 SV=1	1	1	1	1	1	106.89				41808000
H9FIH7	Nuclear pore membrane glycoprotein 210 (Fragment)	NUP210	H9FIH7;F6XNY4;G7MKN9;F6XNW1;I0FJN5;H9YVA8;A0A1D5QGU5	H9FIH7_MACMU Nuclear pore membrane glycoprotein 210 (Fragment) OS=Macaca mulatta OX=9544 GN=NUP210 PE=2 SV=1;F6XNY4_MACMU Uncharacterized protein OS=Macaca mulatta OX=9544 GN=NUP210 PE=4 SV=2;G7MKN9_MACMU Uncharacterized protein (Fragment) OS=Macaca mulatt	7	2	2	2	4.9	75.494			7263400		42132000
G7MLD9	Calcium/calmodulin-dependent protein kinase type II subunit beta (Fragment)	EGK_13732	G7MLD9;A0A1D5QGY4;H9FM52;H9FM53;F7FD75;F7F2A9;F7FD81;F6PKX6;H9G0A0;I2CY34;A0A1D5RJS6;H9G0A1;I2CYW5;F7FD86;H9G0A3;H9G0A4;G7N250;F7FD93;H9G0A2;A0A1D5Q485;H9FC90;A0A1D5RCN6;H9FC88	G7MLD9_MACMU Calcium/calmodulin-dependent protein kinase type II subunit beta (Fragment) OS=Macaca mulatta OX=9544 GN=EGK_13732 PE=4 SV=1;A0A1D5QGY4_MACMU Uncharacterized protein OS=Macaca mulatta OX=9544 GN=CAMK2B PE=4 SV=1;H9FM52_MACMU Calcium/calmodulin	23	11	2	6	22.6	70.189	132980000	127850000	55538000	132580000	116520000	116290000	92305000	134780000	124040000
A0A1D5RBT8	Uncharacterized protein	HYOU1	A0A1D5RBT8;A0A1D5QH14;I2CUF6;H9Z4E0;H9ER73;G7NCE2;A0A1D5Q1S4;A0A1D5Q7R4	A0A1D5RBT8_MACMU Uncharacterized protein OS=Macaca mulatta OX=9544 GN=HYOU1 PE=3 SV=1;A0A1D5QH14_MACMU Uncharacterized protein OS=Macaca mulatta OX=9544 GN=HYOU1 PE=3 SV=1;I2CUF6_MACMU Hypoxia up-regulated protein 1 OS=Macaca mulatta OX=9544 GN=HYOU1 PE=2	8	4	4	4	5	104.76	43355000	53701000	74556000	54547000	81542000	57582000	69961000	39580000	52390000
F7FL93	Uncharacterized protein	MRPL48	F7FL93;G7NEA5;A0A1D5QH53	F7FL93_MACMU Uncharacterized protein OS=Macaca mulatta OX=9544 GN=MRPL48 PE=4 SV=2;G7NEA5_MACMU Uncharacterized protein (Fragment) OS=Macaca mulatta OX=9544 GN=EGK_06663 PE=4 SV=1;A0A1D5QH53_MACMU Uncharacterized protein OS=Macaca mulatta OX=9544 GN=MRPL48	3	3	3	3	17.3	22.872	84826000	106560000	79649000	89806000	81678000	70296000	91395000	78999000	90734000
A0A1D5QH65	Uncharacterized protein	CUL1	A0A1D5QH65;A0A1D5QJX1;F6UKV3;H9G0U2	A0A1D5QH65_MACMU Uncharacterized protein OS=Macaca mulatta OX=9544 GN=CUL1 PE=3 SV=1;A0A1D5QJX1_MACMU Uncharacterized protein OS=Macaca mulatta OX=9544 GN=CUL1 PE=3 SV=1;F6UKV3_MACMU Uncharacterized protein OS=Macaca mulatta OX=9544 GN=CUL1 PE=3 SV=2;H9G0U	4	1	1	1	3.4	54.674
A0A1D5QH72	Serine/threonine-protein phosphatase	PPP3CA	A0A1D5QH72;A0A1D5RII7;F6Q932;G7N260;H9FBG1;H9EP04;H9EP05;G7MTI6;F6SF81;F6SFC6;F6SFE0;F6SEH5	A0A1D5QH72_MACMU Serine/threonine-protein phosphatase OS=Macaca mulatta OX=9544 GN=PPP3CA PE=3 SV=1;A0A1D5RII7_MACMU Serine/threonine-protein phosphatase OS=Macaca mulatta OX=9544 GN=PPP3CA PE=3 SV=1;F6Q932_MACMU Serine/threonine-protein phosphatase OS=Mac	12	1	1	1	2.8	47.815	24307000			25032000
A0A1D5QH77	Uncharacterized protein	HDGFL2	A0A1D5QH77;F6TFQ9;I0FH21;A0A1D5QPJ1;H9F490;G7NLX3	A0A1D5QH77_MACMU Uncharacterized protein OS=Macaca mulatta OX=9544 GN=HDGFL2 PE=4 SV=1;F6TFQ9_MACMU Uncharacterized protein OS=Macaca mulatta OX=9544 GN=HDGFL2 PE=4 SV=2;I0FH21_MACMU Hepatoma-derived growth factor-related protein 2 isoform 1 OS=Macaca mula	6	2	1	1	3.7	69.344			17704000		21624000
F7G744	Acylamino-acid-releasing enzyme	APEH	F7G744;A0A1D5QH82;G7ML91	F7G744_MACMU Acylamino-acid-releasing enzyme OS=Macaca mulatta OX=9544 GN=APEH PE=2 SV=1;A0A1D5QH82_MACMU Uncharacterized protein OS=Macaca mulatta OX=9544 GN=APEH PE=4 SV=1;G7ML91_MACMU Uncharacterized protein OS=Macaca mulatta OX=9544 GN=EGK_11632 PE=4 S	3	1	1	1	1.6	81.379		13079000	13558000	13142000	16036000
Q5TM60	ATP-binding cassette, sub-family F (GCN20), member 1	ABCF1	Q5TM60;A0A1D5QHA7;F7FXH1;G7MRF3;H9FRK3;A0A1D5RKW5	Q5TM60_MACMU ATP-binding cassette, sub-family F (GCN20), member 1 OS=Macaca mulatta OX=9544 GN=ABCF1 PE=4 SV=1;A0A1D5QHA7_MACMU Uncharacterized protein OS=Macaca mulatta OX=9544 GN=ABCF1 PE=4 SV=1;F7FXH1_MACMU Uncharacterized protein OS=Macaca mulatta OX=9	6	6	6	6	8.8	91.651	15354000		46420000	31555000	81050000		24668000	13769000
A0A1D5QHF7	Uncharacterized protein	DCXR	A0A1D5QHF7;G7NHH0;H9EWZ4;A0A1D5R1P5;F7FSI7	A0A1D5QHF7_MACMU Uncharacterized protein OS=Macaca mulatta OX=9544 GN=DCXR PE=4 SV=1;G7NHH0_MACMU Uncharacterized protein (Fragment) OS=Macaca mulatta OX=9544 GN=EGK_09118 PE=4 SV=1;H9EWZ4_MACMU L-xylulose reductase isoform 1 OS=Macaca mulatta OX=9544 GN=D	5	4	4	4	32.2	18.625	23936000	22121000	35914000
H9F1T5	U1 small nuclear ribonucleoprotein C (Fragment)	SNRPC	H9F1T5;A0A1D5QHI0;A0A1I7Q455;I0FUG1;A0A1D5RBW7;A0A1D5QR10;F6TQS7;F6TFD9	H9F1T5_MACMU U1 small nuclear ribonucleoprotein C (Fragment) OS=Macaca mulatta OX=9544 GN=SNRPC PE=2 SV=1;A0A1D5QHI0_MACMU U1 small nuclear ribonucleoprotein C OS=Macaca mulatta OX=9544 GN=SNRPC PE=3 SV=1;A0A1I7Q455_MACMU U1 small nuclear ribonucleoprotein	8	1	1	1	7	13.853			25673000	18766000	11395000	21075000
A0A1D5QHK2	Uncharacterized protein	LMCD1	A0A1D5QHK2;G7MKT4;A0A1D5RCS0	A0A1D5QHK2_MACMU Uncharacterized protein OS=Macaca mulatta OX=9544 GN=LMCD1 PE=4 SV=1;G7MKT4_MACMU Dyxin OS=Macaca mulatta OX=9544 GN=LMCD1 PE=2 SV=1;A0A1D5RCS0_MACMU Uncharacterized protein OS=Macaca mulatta OX=9544 GN=LMCD1 PE=4 SV=1	3	7	1	7	29.5	32.899		37694000	145460000		14708000	11858000	310240000	14014000	27037000
A0A1D5QHL9	Uncharacterized protein	KRT14	A0A1D5QHL9;CON__P19001;F7A635;CON__P08727;CON__P19012;CON__Q61782;H9H3J6;G7NI94;F6XQM6;CON__Q8N1A0;G7NIC5;F7FXZ9;CON__Q14525;F6QJI3;G7NIC7;F7FXM2;CON__Q9UE12;CON__Q15323;CON__A2A5Y0;CON__Q9C075;CON__Q99PS0;G7NIA2;F7B5A6;CON__P35900;A0A1D5R650;A0A1D5RKW0;CON__Q9D312;G7NID0;F7ACC2;CON__Q14532;G7NIC8;F7ACE0;G7NIC9;CON__A2AB72;CON__O76015;G7NII5;F7ACA5;CON__O76013;CON__O76014;CON__REFSEQ:XP_986630	A0A1D5QHL9_MACMU Uncharacterized protein OS=Macaca mulatta OX=9544 GN=KRT14 PE=3 SV=1	40	13	0	1	33.1	48.909
H9F8A3	Eukaryotic peptide chain release factor GTP-binding subunit ERF3A isoform 1 (Fragment)	GSPT1	H9F8A3;H9F7N2;H9F726;A0A1D5REB9;A0A1D5QZ71;A0A1D5QHP9;H9F7N3;I0FR50;H9FTH0;F7EJK7;A0A1D5QCP4;G7NPN7;G7NRG2	H9F8A3_MACMU Eukaryotic peptide chain release factor GTP-binding subunit ERF3A isoform 1 (Fragment) OS=Macaca mulatta OX=9544 GN=GSPT1 PE=2 SV=1;H9F7N2_MACMU Eukaryotic peptide chain release factor GTP-binding subunit ERF3A isoform 1 (Fragment) OS=Macaca m	13	5	5	5	10	64.644	57016000	35024000	58875000	44154000	129770000	44601000	27202000	36042000	65516000
A0A1D5QHT0	Uncharacterized protein	SCRN3	A0A1D5QHT0;H9EZI4;F6TI43;F6TI34	A0A1D5QHT0_MACMU Uncharacterized protein OS=Macaca mulatta OX=9544 GN=SCRN3 PE=4 SV=1;H9EZI4_MACMU Secernin-3 isoform 1 (Fragment) OS=Macaca mulatta OX=9544 GN=SCRN3 PE=2 SV=1;F6TI43_MACMU Uncharacterized protein OS=Macaca mulatta OX=9544 GN=SCRN3 PE=4 SV=	4	1	1	1	2.9	42.792
H9FZ34	Tight junction protein ZO-1 isoform b	TJP1	H9FZ34;A0A1D5QHY2;F7F5Q7;F7F5R3;G7MW84;H9FZ35;F6V6C5;F6VCX4	H9FZ34_MACMU Tight junction protein ZO-1 isoform b OS=Macaca mulatta OX=9544 GN=TJP1 PE=2 SV=1;A0A1D5QHY2_MACMU Uncharacterized protein OS=Macaca mulatta OX=9544 GN=TJP1 PE=3 SV=1;F7F5Q7_MACMU Uncharacterized protein OS=Macaca mulatta OX=9544 GN=TJP1 PE=3	8	8	8	8	5.7	187.01	46500000	32396000	27707000	35169000		59177000	60948000	32746000
A0A1D5QI26	Uncharacterized protein	FBH1	A0A1D5QI26;A0A1D5RF21;H9H3S1;F6UE68	A0A1D5QI26_MACMU Uncharacterized protein OS=Macaca mulatta OX=9544 GN=FBH1 PE=4 SV=1;A0A1D5RF21_MACMU Uncharacterized protein OS=Macaca mulatta OX=9544 GN=FBH1 PE=4 SV=1;H9H3S1_MACMU Uncharacterized protein OS=Macaca mulatta OX=9544 GN=FBH1 PE=4 SV=1;F6UE6	4	1	1	1	2	46.614	17777000	7789000			12316000	14840000		7870800
A0A1D5R1B3	Uncharacterized protein		A0A1D5R1B3;A0A1D5QKR3;H9EN62;G7MT84;A0A1D5R3F6;A0A1D5QI85;A0A1D5RH27;F7ESJ8;I2CYB9;F7HD00;A0A1D5QFW0;A0A1D5RIN6;A0A1D5QW59;A0A1D5QZA1	A0A1D5R1B3_MACMU Uncharacterized protein OS=Macaca mulatta OX=9544 PE=4 SV=1;A0A1D5QKR3_MACMU Small ubiquitin-related modifier 2 isoform b OS=Macaca mulatta OX=9544 GN=SUMO2 PE=2 SV=1;H9EN62_MACMU Small ubiquitin-related modifier OS=Macaca mulatta OX=9544	14	2	2	2	37.9	6.6076	137840000	153070000	185650000	202570000	203720000	120470000	104380000	105130000	108500000
A0A1D5QID8	Uncharacterized protein	CHCHD7	A0A1D5QID8;G7MZE0	A0A1D5QID8_MACMU Uncharacterized protein OS=Macaca mulatta OX=9544 GN=CHCHD7 PE=4 SV=1;G7MZE0_MACMU Coiled-coil-helix-coiled-coil-helix domain-containing protein 7 OS=Macaca mulatta OX=9544 GN=CHCHD7 PE=2 SV=1	2	1	1	1	19.1	11.019		51698000	30852000	36596000	39404000	70048000		51670000	46362000
A0A1D5QIE0	Uncharacterized protein	P4HA1	A0A1D5QIE0;F6WHF6;H9Z9F8;H9FV19;H9FV18;G7N269;F6WHG3;A0A1D5QPK3	A0A1D5QIE0_MACMU Uncharacterized protein OS=Macaca mulatta OX=9544 GN=P4HA1 PE=4 SV=1;F6WHF6_MACMU Uncharacterized protein OS=Macaca mulatta OX=9544 GN=P4HA1 PE=4 SV=2;H9Z9F8_MACMU Prolyl 4-hydroxylase subunit alpha-1 isoform 1 OS=Macaca mulatta OX=9544 GN	8	5	5	5	14.5	51.779			42958000	53212000	102130000
A0A1D5QIE2	Uncharacterized protein	RAB21	A0A1D5QIE2;G7N7N7	A0A1D5QIE2_MACMU Uncharacterized protein OS=Macaca mulatta OX=9544 GN=RAB21 PE=4 SV=1;G7N7N7_MACMU Ras-related protein Rab-21 OS=Macaca mulatta OX=9544 GN=EGK_03933 PE=4 SV=1	2	6	6	6	32.7	24.263	134770000	113900000	138180000	116810000	154800000	106750000	204390000	215810000	160030000
G7N3H9	Uncharacterized protein (Fragment)	EGK_02900	G7N3H9;A0A1D5QIF4;H9ENG9;F7G7C8;F7G7C4	G7N3H9_MACMU Uncharacterized protein (Fragment) OS=Macaca mulatta OX=9544 GN=EGK_02900 PE=4 SV=1;A0A1D5QIF4_MACMU Uncharacterized protein OS=Macaca mulatta OX=9544 GN=PITPNB PE=4 SV=1;H9ENG9_MACMU Phosphatidylinositol transfer protein beta isoform OS=Macac	5	2	2	2	12.8	30.818	35157000			39213000	38654000	32576000	34350000	33869000
G7MYW4	Uncharacterized protein (Fragment)	EGK_18415	G7MYW4;A0A1D5RB75;F6PW84;A0A1D5RJE8;A0A1D5QIL3;A0A1D5QKP3;A0A1D5RDC6	G7MYW4_MACMU Uncharacterized protein (Fragment) OS=Macaca mulatta OX=9544 GN=EGK_18415 PE=4 SV=1;A0A1D5RB75_MACMU Uncharacterized protein OS=Macaca mulatta OX=9544 GN=GSTZ1 PE=3 SV=1;F6PW84_MACMU Maleylacetoacetate isomerase isoform 1 OS=Macaca mulatta OX=	7	3	3	3	19.8	23.686	100930000	116770000	48164000	80284000	58320000	107890000	74338000	83709000	44985000
A0A1D5R2Y7	Uncharacterized protein	PARVA	A0A1D5R2Y7;F7H0M3;A0A1D5QIR6;G7NDW5	A0A1D5R2Y7_MACMU Uncharacterized protein OS=Macaca mulatta OX=9544 GN=PARVA PE=4 SV=1;F7H0M3_MACMU Uncharacterized protein OS=Macaca mulatta OX=9544 GN=PARVA PE=4 SV=2;A0A1D5QIR6_MACMU Uncharacterized protein OS=Macaca mulatta OX=9544 GN=PARVA PE=4 SV=1;G7	4	8	6	8	28.8	36.568	205340000	218610000	341780000	174520000	143680000	153190000	228420000	236160000	223030000
H9FB87	Vacuolar protein sorting-associated protein 29 (Fragment)	VPS29	H9FB87;F6UJC8;F7H8D1;A0A1D5QIR8;A0A1D5RAI2	H9FB87_MACMU Vacuolar protein sorting-associated protein 29 (Fragment) OS=Macaca mulatta OX=9544 GN=VPS29 PE=2 SV=1;F6UJC8_MACMU Vacuolar protein sorting-associated protein 29 OS=Macaca mulatta OX=9544 GN=VPS29 PE=3 SV=2;F7H8D1_MACMU Vacuolar protein sorti	5	3	3	3	22.7	15.979	81287000	61567000	65560000	94698000	80144000	88739000	59417000	55231000	51199000
H9EQ13	Malignant T-cell-amplified sequence	MCTS1	H9EQ13;G7NRB8;A0A1D5QIT9;H9FAS1;I0FGE9;I0FGF0	H9EQ13_MACMU Malignant T-cell-amplified sequence OS=Macaca mulatta OX=9544 GN=MCTS1 PE=2 SV=1;G7NRB8_MACMU Malignant T cell-amplified sequence 1 (Fragment) OS=Macaca mulatta OX=9544 GN=EGK_20889 PE=4 SV=1;A0A1D5QIT9_MACMU Malignant T-cell-amplified sequenc	6	2	2	2	20.4	20.555	17758000	29323000	45587000	53440000	64955000	36456000	18714000		29598000
A0A1D5QJ08	Uncharacterized protein	EFHD1	A0A1D5QJ08;F7H631;G7N970	A0A1D5QJ08_MACMU Uncharacterized protein OS=Macaca mulatta OX=9544 GN=EFHD1 PE=4 SV=1;F7H631_MACMU EF-hand domain-containing protein D1 isoform 1 OS=Macaca mulatta OX=9544 GN=EFHD1 PE=2 SV=1;G7N970_MACMU Uncharacterized protein (Fragment) OS=Macaca mulatta	3	5	3	3	25.3	22.042	24925000		26127000				18686000
H9Z4V5	Protein kinase C delta-binding protein	PRKCDBP	H9Z4V5;G7NE17;A0A1D5QJ12;F6YYR2	H9Z4V5_MACMU Protein kinase C delta-binding protein OS=Macaca mulatta OX=9544 GN=PRKCDBP PE=2 SV=1;G7NE17_MACMU Serum deprivation response factor-related gene product that binds to C-kinase OS=Macaca mulatta OX=9544 GN=EGK_06544 PE=4 SV=1;A0A1D5QJ12_MACMU	4	7	7	7	35.4	28.124	391120000	352650000	460060000	247840000	200620000	241750000	356600000	217920000	193920000
A0A1D5QJ60	Uncharacterized protein	ACTL6A	A0A1D5QJ60;H9ENZ8	A0A1D5QJ60_MACMU Uncharacterized protein OS=Macaca mulatta OX=9544 GN=ACTL6A PE=3 SV=1;H9ENZ8_MACMU Actin-like protein 6A isoform 1 OS=Macaca mulatta OX=9544 GN=ACTL6A PE=2 SV=1	2	2	2	2	9.4	47.534					48141000
A0A1D5QJA5	Uncharacterized protein	OPA1	A0A1D5QJA5;F6Y1R3;I0FS38;F6ZH44;A0A1D5R602;G7MK99;A0A1D5RCE4;F6Y1N8;A0A1D5RHY1;I2CT67;F6Y1S4;H9F8S9;F6Y1T5;A0A1D5R863;H9EZY0;H9F011	A0A1D5QJA5_MACMU Uncharacterized protein OS=Macaca mulatta OX=9544 GN=OPA1 PE=3 SV=1;F6Y1R3_MACMU Uncharacterized protein OS=Macaca mulatta OX=9544 GN=OPA1 PE=3 SV=2;I0FS38_MACMU Dynamin-like 120 kDa protein, mitochondrial isoform 1 OS=Macaca mulatta OX=95	16	27	27	27	31.7	115.51	1284600000	1076000000	986260000	1063800000	1058400000	1293600000	1314700000	908410000	1257100000
F7F364	Uncharacterized protein	PTGR2	F7F364;A0A1D5QJB2;G7MYM3;A0A1D5RI18	F7F364_MACMU Uncharacterized protein OS=Macaca mulatta OX=9544 GN=PTGR2 PE=4 SV=2;A0A1D5QJB2_MACMU Uncharacterized protein OS=Macaca mulatta OX=9544 GN=PTGR2 PE=4 SV=1;G7MYM3_MACMU Prostaglandin reductase 2 OS=Macaca mulatta OX=9544 GN=PTGR2 PE=2 SV=1	4	4	4	4	19	36.831	97458000	136850000	94357000	103180000	91389000	91061000	106750000	167200000	120490000
H9FPC1	Serine-threonine kinase receptor-associated protein	STRAP	H9FPC1;G7N6F7;F6XLB0;A0A1D5QJB5;H9Z059	H9FPC1_MACMU Serine-threonine kinase receptor-associated protein OS=Macaca mulatta OX=9544 GN=STRAP PE=2 SV=1;G7N6F7_MACMU Uncharacterized protein OS=Macaca mulatta OX=9544 GN=EGK_03430 PE=4 SV=1;F6XLB0_MACMU Uncharacterized protein OS=Macaca mulatta OX=95	5	9	9	9	36.6	38.454	97998000	166470000	195750000	263360000	248560000	173480000	105300000	112550000	133780000
A0A1D5QJC0	Uncharacterized protein	FUBP1	A0A1D5QJC0;H9ZEV7;A0A1D5QLH1;G7MHS0;F7HB82;F7HB87;A0A1D5RJK6	A0A1D5QJC0_MACMU Uncharacterized protein OS=Macaca mulatta OX=9544 GN=FUBP1 PE=4 SV=1;H9ZEV7_MACMU Far upstream element-binding protein 1 OS=Macaca mulatta OX=9544 GN=FUBP1 PE=2 SV=1;A0A1D5QLH1_MACMU Far upstream element-binding protein 1 OS=Macaca mulatta	7	9	8	9	18	67.35	55641000	93878000	176160000	111590000	190190000	80345000	84242000		51593000
H9F8H7	Microfibril-associated glycoprotein 4 isoform 1 (Fragment)	MFAP4	H9F8H7;H9H395;F6WBZ5;A0A1D5QJJ6;G7NJ39;A0A1D5R092;A0A1D5R9K8	H9F8H7_MACMU Microfibril-associated glycoprotein 4 isoform 1 (Fragment) OS=Macaca mulatta OX=9544 GN=MFAP4 PE=2 SV=1;H9H395_MACMU Uncharacterized protein OS=Macaca mulatta OX=9544 GN=MFAP4 PE=4 SV=2;F6WBZ5_MACMU Microfibril-associated glycoprotein 4 isofor	7	3	3	3	20.6	24.73	49047000	136760000	5995800000	111330000	16028000	71984000			409960000
F6R8H0	Uncharacterized protein	LOC695602	F6R8H0;H9ESD0;A0A1D5QJQ3;F7AQ73;A0A1D5QSC8;A0A1D5RJE3;G7MQT5	F6R8H0_MACMU Uncharacterized protein OS=Macaca mulatta OX=9544 GN=LOC695602 PE=4 SV=2;H9ESD0_MACMU Protein DEK isoform 1 OS=Macaca mulatta OX=9544 GN=DEK PE=2 SV=1;A0A1D5QJQ3_MACMU Uncharacterized protein OS=Macaca mulatta OX=9544 GN=DEK PE=4 SV=1;F7AQ73_M	7	3	3	3	8.8	40.139	18533000	31629000	45345000	31735000	74856000	33913000	22113000	15492000	20057000
A0A1D5QJT8	Uncharacterized protein	CYB5B	A0A1D5QJT8;A0A1D5QKE2;A0A1D5R4E1;G7NQM3;F7GWE2	A0A1D5QJT8_MACMU Uncharacterized protein OS=Macaca mulatta OX=9544 GN=CYB5B PE=3 SV=1;A0A1D5QKE2_MACMU Uncharacterized protein OS=Macaca mulatta OX=9544 GN=CYB5B PE=3 SV=1;A0A1D5R4E1_MACMU Uncharacterized protein OS=Macaca mulatta OX=9544 GN=CYB5B PE=3 SV=	5	2	2	2	35.1	14.888	170450000	148550000	182040000	189250000	212830000	219400000	157690000	140900000	161470000
H9YW96	Translocon-associated protein subunit gamma	SSR3	H9YW96;A0A1D5QJU5;F7B6K2;G7MJF8	H9YW96_MACMU Translocon-associated protein subunit gamma OS=Macaca mulatta OX=9544 GN=SSR3 PE=2 SV=1;A0A1D5QJU5_MACMU Uncharacterized protein OS=Macaca mulatta OX=9544 GN=LOC106996872 PE=4 SV=1;F7B6K2_MACMU Uncharacterized protein OS=Macaca mulatta OX=9544	4	1	1	1	7.6	21.08			44022000	69016000	57371000
A0A1D5QJU7	Uncharacterized protein		A0A1D5QJU7;G7NKP6;F6ZAZ3;F6ZAY5;F7CL39;H9H5A5;F7GLR1;F6PSS1;F7EUI3;A0A1D5QTI7;A0A1D5Q8W3;G7MJ81	A0A1D5QJU7_MACMU Uncharacterized protein OS=Macaca mulatta OX=9544 PE=3 SV=1;G7NKP6_MACMU Uncharacterized protein OS=Macaca mulatta OX=9544 GN=EGK_09674 PE=3 SV=1;F6ZAZ3_MACMU Uncharacterized protein OS=Macaca mulatta OX=9544 GN=C18H18orf32 PE=3 SV=2;F6ZAY	12	6	1	6	40.8	21.386	35726000	110190000	479380000	543270000	798970000	570400000	211260000	64949000	71148000
A0A1D5QJV6	Uncharacterized protein	RAB4A	A0A1D5QJV6	A0A1D5QJV6_MACMU Uncharacterized protein OS=Macaca mulatta OX=9544 GN=RAB4A PE=4 SV=1	1	3	0	2	28.1	13.586	151410000	220440000	113650000	156060000	152800000	158190000	170770000	233350000	178890000
A0A1D5QJW0	Uncharacterized protein	SLMAP	A0A1D5QJW0;F6S6M2;H9FZM0;F6S6L4;F7H4Q4;F7H4Q8	A0A1D5QJW0_MACMU Uncharacterized protein OS=Macaca mulatta OX=9544 GN=SLMAP PE=4 SV=1;F6S6M2_MACMU Uncharacterized protein OS=Macaca mulatta OX=9544 GN=SLMAP PE=4 SV=2;H9FZM0_MACMU Sarcolemmal membrane-associated protein OS=Macaca mulatta OX=9544 GN=SLMAP	6	19	2	19	19.2	90.835	1303500000	1181600000	1078200000	1052800000	1076900000	1374600000	1146900000	1289200000	1118000000
G7N811	Kynureninase	KYNU	G7N811;A0A1D5QJX6;A0A1D5QGV6;F6URB1;A0A1D5QBF7;H9F804	G7N811_MACMU Kynureninase OS=Macaca mulatta OX=9544 GN=KYNU PE=3 SV=1;A0A1D5QJX6_MACMU Kynureninase OS=Macaca mulatta OX=9544 GN=KYNU PE=3 SV=1;A0A1D5QGV6_MACMU Uncharacterized protein OS=Macaca mulatta OX=9544 GN=KYNU PE=4 SV=1;F6URB1_MACMU Uncharacterize	6	6	6	6	20.9	52.363	16162000			37039000	139220000	15134000
F7E5P5	Uncharacterized protein	PALLD	F7E5P5;G7MSA5;F6Q617;A0A1D5QK24;F7GYW8;H9F066	F7E5P5_MACMU Uncharacterized protein OS=Macaca mulatta OX=9544 GN=PALLD PE=4 SV=2;G7MSA5_MACMU Uncharacterized protein (Fragment) OS=Macaca mulatta OX=9544 GN=EGK_16228 PE=4 SV=1;F6Q617_MACMU Uncharacterized protein OS=Macaca mulatta OX=9544 GN=PALLD PE=4	6	13	1	1	19.6	85.905
F7H131	Adenylate kinase 2, mitochondrial	AK2	F7H131;H9FR37;A0A1D5QK39;A0A1D5RIB1;A0A1D5Q4V6;G7MIA2;A0A1D5QWA7;A0A1D5QX60	F7H131_MACMU Adenylate kinase 2, mitochondrial OS=Macaca mulatta OX=9544 GN=AK2 PE=2 SV=1;H9FR37_MACMU Adenylate kinase 2, mitochondrial OS=Macaca mulatta OX=9544 GN=AK2 PE=2 SV=1;A0A1D5QK39_MACMU Adenylate kinase 2, mitochondrial OS=Macaca mulatta OX=9544	8	10	10	10	60.8	25.614	805060000	824980000	631090000	688360000	751100000	709520000	878500000	473770000	761190000
F7C8M0	Uncharacterized protein	MYL6B	F7C8M0;A0A1D5QK52;G7N7B5	F7C8M0_MACMU Uncharacterized protein OS=Macaca mulatta OX=9544 GN=MYL6B PE=4 SV=2;A0A1D5QK52_MACMU Myosin light chain 6B OS=Macaca mulatta OX=9544 GN=MYL6B PE=2 SV=1	3	3	1	1	18.1	22.227			18111000		8839500		23625000
F7AUY5	Uncharacterized protein	RSL1D1	F7AUY5;A0A1D5QK61;G7NPN6;A0A1D5QM79	F7AUY5_MACMU Uncharacterized protein OS=Macaca mulatta OX=9544 GN=RSL1D1 PE=4 SV=2;A0A1D5QK61_MACMU Uncharacterized protein OS=Macaca mulatta OX=9544 GN=RSL1D1 PE=4 SV=1;G7NPN6_MACMU Uncharacterized protein OS=Macaca mulatta OX=9544 GN=EGK_12511 PE=4 SV=1	4	4	4	4	9.1	50.694	28201000	41915000	49073000	43236000	79913000	55366000	38520000
A0A1D5QKB0	Uncharacterized protein		A0A1D5QKB0	A0A1D5QKB0_MACMU Uncharacterized protein OS=Macaca mulatta OX=9544 PE=4 SV=1	1	2	1	1	18.9	14.352		38270000	150380000	162150000	100160000	79762000
A0A1D5QKI6	Uncharacterized protein	GLIPR2	A0A1D5QKI6;A0A1D5QRX8;F6SHW5;G7NFB1	A0A1D5QKI6_MACMU Uncharacterized protein OS=Macaca mulatta OX=9544 GN=GLIPR2 PE=3 SV=1;A0A1D5QRX8_MACMU Uncharacterized protein OS=Macaca mulatta OX=9544 GN=GLIPR2 PE=3 SV=1;F6SHW5_MACMU Golgi-associated plant pathogenesis-related protein 1 OS=Macaca mulat	4	1	1	1	10.4	13.911	14367000	16335000	24856000	11388000			16499000	15693000	15390000
F6Q7H6	Uncharacterized protein	GPS1	F6Q7H6;F6Q782;A0A1D5QKK3;H9FTC1;H9FTC0;F6Q7C0;A0A1D5Q964	F6Q7H6_MACMU Uncharacterized protein OS=Macaca mulatta OX=9544 GN=GPS1 PE=4 SV=2;F6Q782_MACMU Uncharacterized protein OS=Macaca mulatta OX=9544 GN=GPS1 PE=4 SV=2;A0A1D5QKK3_MACMU Uncharacterized protein OS=Macaca mulatta OX=9544 GN=GPS1 PE=4 SV=1;H9FTC1_MA	7	5	5	5	12	55.569	67706000	98560000	44408000	43620000	84491000		40338000	42218000	70811000
H9F5T5	Acyl-CoA dehydrogenase family member 9, mitochondrial (Fragment)	ACAD9	H9F5T5;H9Z1G5;A0A1D5QKM8;F7HEB7	H9F5T5_MACMU Acyl-CoA dehydrogenase family member 9, mitochondrial (Fragment) OS=Macaca mulatta OX=9544 GN=ACAD9 PE=2 SV=1;H9Z1G5_MACMU Acyl-CoA dehydrogenase family member 9, mitochondrial OS=Macaca mulatta OX=9544 GN=ACAD9 PE=2 SV=1;A0A1D5QKM8_MACMU Unch	4	8	8	8	16.6	67.523	233480000	215530000	139510000	220350000	242420000	216740000	296010000	288450000	238310000
A0A1D5QXX3	Uncharacterized protein	DHRS7B	A0A1D5QXX3;F6XP58;A0A1D5QKN8;G7NGH3	A0A1D5QXX3_MACMU Uncharacterized protein OS=Macaca mulatta OX=9544 GN=DHRS7B PE=3 SV=1;F6XP58_MACMU Dehydrogenase/reductase SDR family member 7B OS=Macaca mulatta OX=9544 GN=DHRS7B PE=2 SV=2;A0A1D5QKN8_MACMU Uncharacterized protein OS=Macaca mulatta OX=954	4	2	2	2	8.4	34.725		19887000			20554000				24216000
H9EVY0	39S ribosomal protein L43, mitochondrial isoform a	MRPL43	H9EVY0;F7AXG1;F7AXG9;A0A1D5QUU1;A0A1D5QKQ0;A0A1D5RHU4;F7AXE6;A0A1D5QIY2	H9EVY0_MACMU 39S ribosomal protein L43, mitochondrial isoform a OS=Macaca mulatta OX=9544 GN=MRPL43 PE=2 SV=1;F7AXG1_MACMU Uncharacterized protein OS=Macaca mulatta OX=9544 GN=MRPL43 PE=4 SV=2;F7AXG9_MACMU Uncharacterized protein OS=Macaca mulatta OX=9544	8	2	2	2	13.8	17.887
A0A1D5QKU8	Dolichyl-diphosphooligosaccharide--protein glycosyltransferase subunit DAD1	DAD1	A0A1D5QKU8;G7MX20;F6Q1Z9	A0A1D5QKU8_MACMU Dolichyl-diphosphooligosaccharide--protein glycosyltransferase subunit DAD1 OS=Macaca mulatta OX=9544 GN=DAD1 PE=3 SV=1;G7MX20_MACMU Dolichyl-diphosphooligosaccharide--protein glycosyltransferase subunit DAD1 OS=Macaca mulatta OX=9544 GN=D	3	3	3	3	37.6	9.5541	40500000	69599000	86119000	72108000	107400000		65873000	67009000	58295000
A0A1D5QKW0	Uncharacterized protein	RAB1A	A0A1D5QKW0;G7N138;F7E770;A0A1D5Q4U5;F7HAM0;A0A1D5R0Z7;A0A1D5R6Z9;H9F1E1;A0A1D5Q732;I0FJZ6;F6YAL9;A0A1D5QM97;A0A1D5QFG1	A0A1D5QKW0_MACMU Uncharacterized protein OS=Macaca mulatta OX=9544 GN=RAB1A PE=4 SV=1;G7N138_MACMU Ras-related protein Rab-1A isoform 1 OS=Macaca mulatta OX=9544 GN=RAB1A PE=2 SV=1;F7E770_MACMU Uncharacterized protein OS=Macaca mulatta OX=9544 GN=RAB1A PE=	13	9	5	9	50.9	19.018	1155200000	1265000000	1180300000	1170200000	1246700000	1134600000	1505500000	1160300000	1089200000
A0A1D5QKY0	39S ribosomal protein L3, mitochondrial	MRPL3	A0A1D5QKY0;F6XHQ0	A0A1D5QKY0_MACMU 39S ribosomal protein L3, mitochondrial OS=Macaca mulatta OX=9544 GN=MRPL3 PE=2 SV=1;F6XHQ0_MACMU Uncharacterized protein OS=Macaca mulatta OX=9544 GN=MRPL3 PE=3 SV=2	2	2	2	2	6.6	38.621	47863000		31902000	49028000	37838000	37500000	58701000	46941000	52489000
F6V3M4	Uncharacterized protein	RHOT1	F6V3M4;F6V3R1;F6WI26;I0FKM6;H9ENC4;F7E515;A0A1D5R439;H9ENC6;F6V3N6;A0A1D5QL28;H9ENC5;F6V3Q2;G7NGU1;A0A1D5QY45;A0A1D5QGB8;G7NQE3;I2CTJ0;H9G1H4;F6RI93	F6V3M4_MACMU Uncharacterized protein OS=Macaca mulatta OX=9544 GN=RHOT1 PE=4 SV=2;F6V3R1_MACMU Mitochondrial Rho GTPase OS=Macaca mulatta OX=9544 GN=RHOT1 PE=3 SV=2;F6WI26_MACMU Mitochondrial Rho GTPase OS=Macaca mulatta OX=9544 GN=RHOT1 PE=3 SV=2;I0FKM6_M	19	5	5	5	10.8	64.951	72384000	55131000	61439000	70105000	53708000	70480000	59686000	76206000	84567000
H9YZY1	Proteasome subunit alpha type	PSMA6	H9YZY1;A0A1D5QL29;A0A1D5QQC9;A0A1D5R6R8;F6W663;F7EAJ5;A0A1D5QL83	H9YZY1_MACMU Proteasome subunit alpha type OS=Macaca mulatta OX=9544 GN=PSMA6 PE=2 SV=1;A0A1D5QL29_MACMU Proteasome subunit alpha type OS=Macaca mulatta OX=9544 GN=PSMA6 PE=3 SV=1;A0A1D5QQC9_MACMU Proteasome subunit alpha type OS=Macaca mulatta OX=9544 GN=	7	7	7	7	35.4	27.399	207030000	216790000	252390000	270880000	279580000	169190000	229370000	183900000	207200000
F6YTK1	Uncharacterized protein	NUP155	F6YTK1;G7MPR2;A0A1D5QL31	F6YTK1_MACMU Uncharacterized protein OS=Macaca mulatta OX=9544 GN=NUP155 PE=4 SV=2;G7MPR2_MACMU Nuclear pore complex protein Nup155 isoform 1 OS=Macaca mulatta OX=9544 GN=NUP155 PE=2 SV=1;A0A1D5QL31_MACMU Uncharacterized protein OS=Macaca mulatta OX=9544 G	3	3	3	3	2.6	148.23				12360000
A0A1D5QL51	Uncharacterized protein	ADAM10	A0A1D5QL51;H9EQI5;G7MXJ7	A0A1D5QL51_MACMU Uncharacterized protein OS=Macaca mulatta OX=9544 GN=ADAM10 PE=4 SV=1;H9EQI5_MACMU Disintegrin and metalloproteinase domain-containing protein 10 OS=Macaca mulatta OX=9544 GN=ADAM10 PE=2 SV=1;G7MXJ7_MACMU Disintegrin and metalloproteinase	3	1	1	1	2.9	57.998							16647000
F7HMC7	Uncharacterized protein	PPT1	F7HMC7;A0A1D5QL55;G7MGA3;F7HMC3;F7HMC2;A0A1D5R1D4;F7HMC5	F7HMC7_MACMU Uncharacterized protein OS=Macaca mulatta OX=9544 GN=PPT1 PE=4 SV=2;A0A1D5QL55_MACMU Palmitoyl-protein thioesterase 1 isoform 1 OS=Macaca mulatta OX=9544 GN=PPT1 PE=2 SV=1;G7MGA3_MACMU Uncharacterized protein OS=Macaca mulatta OX=9544 GN=EGK_0	7	3	3	3	14.1	33.219	78829000	63505000		67322000	48617000	68710000	88322000	70576000	54792000
F7EYZ4	Uncharacterized protein		F7EYZ4;G7NKB8;F7ABL3;A0A1D5QL88;F7BUS1;G7N8D1;F7GNB2;F7DQN9;A0A1D5R080;F7HQS0	F7EYZ4_MACMU Uncharacterized protein OS=Macaca mulatta OX=9544 PE=4 SV=2;G7NKB8_MACMU Uncharacterized protein OS=Macaca mulatta OX=9544 GN=EGK_09516 PE=4 SV=1;F7ABL3_MACMU 60S ribosomal protein L21 OS=Macaca mulatta OX=9544 GN=LOC711174 PE=2 SV=1;A0A1D5QL8	10	4	4	4	32.7	18.493	122710000	157340000	379090000	416870000	578720000	281710000	345260000	137710000	154520000
H9EUQ6	Protein phosphatase 1 regulatory subunit	PPP1R12B	H9EUQ6;F6XR00;A0A1D5QL90;F6XR22;A0A1D5RGK9;G7MEY0;A0A1D5Q3M8;A0A1D5QDX2;F6QPD9;F6XR11;A0A1D5Q152	H9EUQ6_MACMU Protein phosphatase 1 regulatory subunit OS=Macaca mulatta OX=9544 GN=PPP1R12B PE=2 SV=1;F6XR00_MACMU Protein phosphatase 1 regulatory subunit OS=Macaca mulatta OX=9544 GN=PPP1R12B PE=4 SV=2;A0A1D5QL90_MACMU Protein phosphatase 1 regulatory su	11	7	6	6	8	110.47	119080000	83636000	113280000	53144000	40955000	95491000	43891000	91329000	116910000
H9FAN6	Protein NipSnap homolog 2 isoform 1 (Fragment)	GBAS	H9FAN6;G7ML94;I2CWV1;A0A1D5QLC1;F6RU91;A0A1D5RFW8;H9G114;G7N3J5	H9FAN6_MACMU Protein NipSnap homolog 2 isoform 1 (Fragment) OS=Macaca mulatta OX=9544 GN=GBAS PE=2 SV=1;G7ML94_MACMU Uncharacterized protein (Fragment) OS=Macaca mulatta OX=9544 GN=EGK_13672 PE=4 SV=1;I2CWV1_MACMU Protein NipSnap homolog 2 isoform 1 OS=Mac	8	10	10	10	32.5	31.565	1967700000	1805600000	1346900000	1407100000	1664300000	2036200000	2431500000	2088200000	1967200000
A0A1D5QLD8	Uncharacterized protein		A0A1D5QLD8	A0A1D5QLD8_MACMU Uncharacterized protein OS=Macaca mulatta OX=9544 PE=4 SV=1	1	11	11	11	22.9	62.528	494230000	544740000	291690000	359390000	260140000	581110000	366120000	376030000	661680000
H9ENN2	Myosin-10	MYH10	H9ENN2;A0A1D5QLL7;F7HRA5	H9ENN2_MACMU Myosin-10 OS=Macaca mulatta OX=9544 GN=MYH10 PE=2 SV=1;A0A1D5QLL7_MACMU Uncharacterized protein OS=Macaca mulatta OX=9544 GN=MYH10 PE=3 SV=1;F7HRA5_MACMU Uncharacterized protein OS=Macaca mulatta OX=9544 GN=MYH10 PE=3 SV=2	3	91	71	74	52.9	229.01	96416000	300890000	11844000000	189210000	535770000	41367000	70900000	76442000	318140000
F6Z5M1	Uncharacterized protein	ESYT2	F6Z5M1;A0A1D5QLN6;H9F701;F6Z5L0	F6Z5M1_MACMU Uncharacterized protein OS=Macaca mulatta OX=9544 GN=ESYT2 PE=4 SV=1;A0A1D5QLN6_MACMU Uncharacterized protein OS=Macaca mulatta OX=9544 GN=ESYT2 PE=4 SV=1;H9F701_MACMU Extended synaptotagmin-2 (Fragment) OS=Macaca mulatta OX=9544 GN=ESYT2 PE=2	4	10	10	10	17.4	98.908	188460000	150730000	110380000	229090000	174490000	201730000	151370000	118360000	173110000
A0A1D5QUS1	Uncharacterized protein	AGRN	A0A1D5QUS1;A0A1D5QLN8;F7G642;H9FU64;H9FU63	A0A1D5QUS1_MACMU Uncharacterized protein OS=Macaca mulatta OX=9544 GN=AGRN PE=4 SV=1;A0A1D5QLN8_MACMU Uncharacterized protein OS=Macaca mulatta OX=9544 GN=AGRN PE=4 SV=1;F7G642_MACMU Uncharacterized protein OS=Macaca mulatta OX=9544 GN=AGRN PE=4 SV=2;H9FU6	5	5	5	5	4.4	196.46	56299000	46284000		38002000	36880000	37998000	62269000	57896000	60523000
A0A1D5QLQ2	Uncharacterized protein	NDUFB10	A0A1D5QLQ2;F7APN6	A0A1D5QLQ2_MACMU Uncharacterized protein OS=Macaca mulatta OX=9544 GN=NDUFB10 PE=4 SV=1;F7APN6_MACMU Uncharacterized protein OS=Macaca mulatta OX=9544 GN=NDUFB10 PE=4 SV=2	2	10	1	1	52.2	21.369			13177000	273680000			314580000	18690000
G7MEZ8	Uncharacterized protein	EGK_01819	G7MEZ8;A0A1D5QLT8;F7FA18;A0A1D5R0M3;A0A1D5QRE6;F7H6C1;F7E9P3;F7H6C6;F7H6C5;G7NES0	G7MEZ8_MACMU Uncharacterized protein OS=Macaca mulatta OX=9544 GN=EGK_01819 PE=3 SV=1;A0A1D5QLT8_MACMU Serine/threonine-protein kinase Nek7 OS=Macaca mulatta OX=9544 GN=NEK7 PE=2 SV=1;F7FA18_MACMU Uncharacterized protein OS=Macaca mulatta OX=9544 GN=NEK7 P	10	4	4	4	16.9	34.494	49498000	54876000	37622000	49669000	37287000	27683000	71846000	38992000
F6S8R2	Programmed cell death protein 5	PDCD5	F6S8R2;A0A1D5QLU6;F6XDH8;A0A1D5Q6I2;G7NLF7	F6S8R2_MACMU Programmed cell death protein 5 OS=Macaca mulatta OX=9544 GN=PDCD5 PE=2 SV=1;A0A1D5QLU6_MACMU Uncharacterized protein OS=Macaca mulatta OX=9544 GN=PDCD5 PE=4 SV=1;F6XDH8_MACMU Uncharacterized protein OS=Macaca mulatta OX=9544 GN=PDCD5 PE=4 SV=	5	4	4	4	32.8	14.285	25390000	41726000	49984000	40137000	83531000	35726000	44748000	31019000
A0A1D5QLV3	Succinate dehydrogenase [ubiquinone] iron-sulfur subunit, mitochondrial	SDHB	A0A1D5QLV3;G7MH54;F7GTK4;A0A1D5R5V6;G7NAB5	A0A1D5QLV3_MACMU Succinate dehydrogenase [ubiquinone] iron-sulfur subunit, mitochondrial OS=Macaca mulatta OX=9544 GN=SDHB PE=3 SV=1;G7MH54_MACMU Succinate dehydrogenase [ubiquinone] iron-sulfur subunit, mitochondrial OS=Macaca mulatta OX=9544 GN=EGK_00292	5	15	15	15	49.6	29.557	3724400000	3944200000	2421700000	3416200000	2574500000	3740700000	3524900000	4209800000	3836600000
F7G176	Proteasome subunit alpha type	PSMA4	F7G176;G7MYG1;A0A1D5QLV9;F7G726;A0A1D5QGJ7	F7G176_MACMU Proteasome subunit alpha type OS=Macaca mulatta OX=9544 GN=PSMA4 PE=3 SV=2;G7MYG1_MACMU Proteasome subunit alpha type (Fragment) OS=Macaca mulatta OX=9544 GN=EGK_17725 PE=3 SV=1;A0A1D5QLV9_MACMU Proteasome subunit alpha type OS=Macaca mulatta	5	6	6	6	26.5	29.315	131310000	133300000	125230000	160100000	217650000	145780000	127570000	129170000	123950000
A0A1D5QRG9	Uncharacterized protein	BCAP29	A0A1D5QRG9;F7HKA0;F7HK98;A0A1D5QLW2	A0A1D5QRG9_MACMU Uncharacterized protein OS=Macaca mulatta OX=9544 GN=BCAP29 PE=4 SV=1;F7HKA0_MACMU B-cell receptor-associated protein 29 isoform a OS=Macaca mulatta OX=9544 GN=BCAP29 PE=2 SV=1;F7HK98_MACMU Uncharacterized protein OS=Macaca mulatta OX=9544	4	2	2	2	11.1	25.412	19169000	31323000	24286000	23912000	24346000	30491000	25714000	36028000	26961000
I0FTK4	Omega-amidase NIT2	NIT2	I0FTK4;A0A1D5QLX2;F7GIY6	I0FTK4_MACMU Omega-amidase NIT2 OS=Macaca mulatta OX=9544 GN=NIT2 PE=2 SV=1;A0A1D5QLX2_MACMU Uncharacterized protein OS=Macaca mulatta OX=9544 GN=NIT2 PE=4 SV=1;F7GIY6_MACMU Uncharacterized protein OS=Macaca mulatta OX=9544 GN=NIT2 PE=4 SV=2	3	7	7	7	32.2	30.641	210730000	277080000	140560000	160660000	131910000	180280000	169390000	196830000	131690000
G7NNF3	Cartilage oligomeric matrix protein	EGK_10342	G7NNF3;A0A1D5QLX6;F7H6X3	G7NNF3_MACMU Cartilage oligomeric matrix protein OS=Macaca mulatta OX=9544 GN=EGK_10342 PE=4 SV=1;A0A1D5QLX6_MACMU Uncharacterized protein OS=Macaca mulatta OX=9544 GN=COMP PE=4 SV=1;F7H6X3_MACMU Uncharacterized protein OS=Macaca mulatta OX=9544 GN=COMP PE	3	2	1	1	3.4	76.928			43319000
F7CPN4	Uncharacterized protein	LIMCH1	F7CPN4;I2CTY2;I0FQ40;H9FRK1;I2CTG1;A0A1D5QM13;A0A1D5QXK1;H9FRK2;F7CP73;A0A1D5QQ32;A0A1D5REI0;G7MST5;F7CP92	F7CPN4_MACMU Uncharacterized protein OS=Macaca mulatta OX=9544 GN=LIMCH1 PE=4 SV=2;I2CTY2_MACMU LIM and calponin homology domains-containing protein 1 isoform c OS=Macaca mulatta OX=9544 GN=LIMCH1 PE=2 SV=1;I0FQ40_MACMU LIM and calponin homology domains-co	13	4	4	4	6.3	110.23	25286000	33711000	19391000	29336000	25221000	27448000	44715000	19829000	37817000
A0A1D5QM14	Dolichyl-diphosphooligosaccharide--protein glycosyltransferase 48 kDa subunit	DDOST	A0A1D5QM14;F7EWE3;G7MHE2;A0A1D5QXV3	A0A1D5QM14_MACMU Dolichyl-diphosphooligosaccharide--protein glycosyltransferase 48 kDa subunit OS=Macaca mulatta OX=9544 GN=DDOST PE=3 SV=1;F7EWE3_MACMU Dolichyl-diphosphooligosaccharide--protein glycosyltransferase 48 kDa subunit OS=Macaca mulatta OX=9544	4	9	9	9	28.3	49.122	144500000	100810000	205370000	191340000	356400000	97447000	89826000	69006000	77182000
F7E4F9	Uncharacterized protein	EEF1E1	F7E4F9;A0A1D5QM76;A0A1D5RAH4	F7E4F9_MACMU Uncharacterized protein OS=Macaca mulatta OX=9544 GN=EEF1E1 PE=4 SV=2;A0A1D5QM76_MACMU Uncharacterized protein OS=Macaca mulatta OX=9544 GN=EEF1E1 PE=4 SV=1;A0A1D5RAH4_MACMU Eukaryotic translation elongation factor 1 epsilon-1 isoform 1 OS=Mac	3	2	2	2	15.4	15.164	19871000	45030000	29581000	50699000	48508000	43777000	43494000		22932000
H9FUN4	Aspartyl/asparaginyl beta-hydroxylase isoform l	ASPH	H9FUN4;H9FUN3;F6TBU7;A0A1D5QZ88;H9Z957;F6WQN7;F6TBT1;F6TBW1;A0A1D5QMC0;A0A1D5R0P7;A0A1D5QXY2;A0A1D5QPK7;H9Z956;H9FUN1;H9EXU6;F7F6G5;G7MZF6	H9FUN4_MACMU Aspartyl/asparaginyl beta-hydroxylase isoform l OS=Macaca mulatta OX=9544 GN=ASPH PE=2 SV=1;H9FUN3_MACMU Aspartyl/asparaginyl beta-hydroxylase isoform k OS=Macaca mulatta OX=9544 GN=ASPH PE=2 SV=1;F6TBU7_MACMU Uncharacterized protein OS=Macaca	17	2	2	2	22.7	22.235	18320000		42328000	40641000	70475000	26192000		26877000
G7NGD2	BNIP2 motif-containing molecule at the C-terminal region 1	EGK_07800	G7NGD2;A0A1D5QMC1;F6SAX4;A0A1D5QQ35;H9FJD6;F7H0V8;A0A1D5QFL3;H9FDF6	G7NGD2_MACMU BNIP2 motif-containing molecule at the C-terminal region 1 OS=Macaca mulatta OX=9544 GN=EGK_07800 PE=4 SV=1;A0A1D5QMC1_MACMU Uncharacterized protein OS=Macaca mulatta OX=9544 GN=PRUNE2 PE=4 SV=1;F6SAX4_MACMU Uncharacterized protein OS=Macaca m	8	3	3	3	1.4	339.54		5361400						11308000	9549900
A0A1D5QMG1	40S ribosomal protein S7	RPS7	A0A1D5QMG1;F7H2G1;H9EYS5;A0A1D5QFA4;G7NS51;F6UCW2;G7MFM2;A0A1D5RE18;A0A1D5QAJ5	A0A1D5QMG1_MACMU 40S ribosomal protein S7 OS=Macaca mulatta OX=9544 GN=RPS7 PE=2 SV=1;F7H2G1_MACMU 40S ribosomal protein S7 OS=Macaca mulatta OX=9544 GN=RPS7 PE=3 SV=2;H9EYS5_MACMU 40S ribosomal protein S7 (Fragment) OS=Macaca mulatta OX=9544 GN=RPS7 PE=2	9	8	8	8	55.2	22.127	356770000	470450000	814280000	954180000	1207500000	612410000	696270000	343460000	347630000
A0A1D5QMK7	Uncharacterized protein		A0A1D5QMK7	A0A1D5QMK7_MACMU Uncharacterized protein OS=Macaca mulatta OX=9544 PE=4 SV=1	1	2	1	2	16.2	15.641	93681000		73844000	95480000	82888000	86930000		6910500	100370000
A0A1D5QMN8	Uncharacterized protein	EML4	A0A1D5QMN8;I0FQY3;A0A1D5RAU7;I0FQY2;G7N9Y1;F7GAG9	A0A1D5QMN8_MACMU Uncharacterized protein OS=Macaca mulatta OX=9544 GN=EML4 PE=4 SV=1;I0FQY3_MACMU Echinoderm microtubule-associated protein-like 4 isoform b OS=Macaca mulatta OX=9544 GN=EML4 PE=2 SV=1;A0A1D5RAU7_MACMU Uncharacterized protein OS=Macaca mula	6	1	1	1	1.8	98.475
A0A1D5QMP3	Uncharacterized protein	RYR3	A0A1D5QMP3;F7BI55;A0A1D5RKD1;F7BI64;A0A1D5QY89;A0A1D5R455;A0A1D5RCT7;A0A1D5R710;G7MW98	A0A1D5QMP3_MACMU Uncharacterized protein OS=Macaca mulatta OX=9544 GN=RYR3 PE=4 SV=1;F7BI55_MACMU Uncharacterized protein OS=Macaca mulatta OX=9544 GN=RYR3 PE=4 SV=2;A0A1D5RKD1_MACMU Uncharacterized protein OS=Macaca mulatta OX=9544 GN=RYR3 PE=4 SV=1;F7BI6	9	8	3	3	2.4	539.54	3222700000	2768900000	4122100000	4274500000	3020100000	4945600000	4989100000	2352200000	2011100000
A0A1D5QMS7	Uncharacterized protein	NTMT1	A0A1D5QMS7;F7HMB4	A0A1D5QMS7_MACMU Uncharacterized protein OS=Macaca mulatta OX=9544 GN=NTMT1 PE=4 SV=1;F7HMB4_MACMU Alpha N-terminal protein methyltransferase 1A OS=Macaca mulatta OX=9544 GN=NTMT1 PE=2 SV=1	2	1	1	1	15.2	10.158					21837000
F7HPP6	Sodium/potassium-transporting ATPase subunit alpha	ATP1A3	F7HPP6;A0A1D5R702;A0A1D5QT51;A0A1D5QMZ9;G7NLK7;F6Z1R0;H9FUV9;F7DQE8	F7HPP6_MACMU Sodium/potassium-transporting ATPase subunit alpha OS=Macaca mulatta OX=9544 GN=ATP1A3 PE=2 SV=1;A0A1D5R702_MACMU Sodium/potassium-transporting ATPase subunit alpha OS=Macaca mulatta OX=9544 GN=ATP1A3 PE=3 SV=1;A0A1D5QT51_MACMU Sodium/potassiu	8	29	12	15	38	111.75	901030000	1208000000	676290000	936910000	618900000	989030000	1102300000	1031600000	837020000
B6DYB5	MHC class I antigen (Fragment)	Mamu-B	B6DYB5;B6DYB3;B6DYB2;Q5TM30;A0A1D5QN20;B6DYB4;A0A2H1MYR8	B6DYB5_MACMU MHC class I antigen (Fragment) OS=Macaca mulatta OX=9544 GN=Mamu-B PE=3 SV=1;B6DYB3_MACMU MHC class I antigen (Fragment) OS=Macaca mulatta OX=9544 GN=Mamu-B PE=3 SV=1;B6DYB2_MACMU MHC class I antigen (Fragment) OS=Macaca mulatta OX=9544 GN=Mam	7	4	0	2	20.1	31.571									75964000
A0A1D5QN28	Uncharacterized protein	IVNS1ABP	A0A1D5QN28;F6R585;A2D646	A0A1D5QN28_MACMU Uncharacterized protein OS=Macaca mulatta OX=9544 GN=IVNS1ABP PE=4 SV=1;F6R585_MACMU Influenza virus NS1A-binding protein OS=Macaca mulatta OX=9544 GN=IVNS1ABP PE=2 SV=1;A2D646_MACMU IVNS1ABP (Fragment) OS=Macaca mulatta OX=9544 GN=IVNS1AB	3	2	2	2	4.2	66.809							6536500	27478000
H9FBH2	Ubiquitin thioesterase OTUB1 (Fragment)	OTUB1	H9FBH2;I0FT81;H9ZB05;A0A1D5QN88;F6YJN5;A0A1D5RCG4;A0A1D5Q3K5	H9FBH2_MACMU Ubiquitin thioesterase OTUB1 (Fragment) OS=Macaca mulatta OX=9544 GN=OTUB1 PE=2 SV=1;I0FT81_MACMU Ubiquitin thioesterase OS=Macaca mulatta OX=9544 GN=OTUB1 PE=2 SV=1;H9ZB05_MACMU Ubiquitin thioesterase OS=Macaca mulatta OX=9544 GN=OTUB1 PE=2 S	7	5	5	5	23.8	31.081	128280000	162690000	114340000	121590000	230310000	129240000	64934000	41998000
F6SIE9	Uncharacterized protein	BLMH	F6SIE9;A0A1D5QNC7;G7NGT0;H9ER37	F6SIE9_MACMU Uncharacterized protein OS=Macaca mulatta OX=9544 GN=BLMH PE=4 SV=2;A0A1D5QNC7_MACMU Uncharacterized protein OS=Macaca mulatta OX=9544 GN=BLMH PE=4 SV=1;G7NGT0_MACMU Bleomycin hydrolase (Fragment) OS=Macaca mulatta OX=9544 GN=EGK_08362 PE=4 SV	4	1	1	1	3.5	37.191	15128000	22062000	36216000	31783000	28213000	17583000	17903000		13995000
F7DH41	Uncharacterized protein	MRPS7	F7DH41;A0A1D5QNG0	F7DH41_MACMU Uncharacterized protein OS=Macaca mulatta OX=9544 GN=MRPS7 PE=4 SV=2;A0A1D5QNG0_MACMU 28S ribosomal protein S7, mitochondrial OS=Macaca mulatta OX=9544 GN=MRPS7 PE=2 SV=1	2	1	1	1	5.3	26.749		14950000		20526000		22730000		24425000	37861000
A0A1D5QNH6	10-formyltetrahydrofolate dehydrogenase	ALDH1L1	A0A1D5QNH6;F7FAR5;F7HB04;F7EHJ1;G7N5B5;F6W9P8	A0A1D5QNH6_MACMU 10-formyltetrahydrofolate dehydrogenase OS=Macaca mulatta OX=9544 GN=ALDH1L1 PE=2 SV=1;F7FAR5_MACMU 10-formyltetrahydrofolate dehydrogenase OS=Macaca mulatta OX=9544 GN=ALDH1L1 PE=3 SV=1;F7HB04_MACMU Uncharacterized protein OS=Macaca mulat	6	6	6	6	7.3	98.982	52543000	73034000	46209000	35735000	35327000		46655000	49050000	65139000
A0A1D5QNK4	Uncharacterized protein	DYNC1LI2	A0A1D5QNK4;F6WNX7;G7NPX9;H9F9F9;I2CYI4;H9Z5Z2;A0A1D5RCQ6	A0A1D5QNK4_MACMU Uncharacterized protein OS=Macaca mulatta OX=9544 GN=DYNC1LI2 PE=4 SV=1;F6WNX7_MACMU Uncharacterized protein OS=Macaca mulatta OX=9544 GN=DYNC1LI2 PE=4 SV=2;G7NPX9_MACMU Dynein light intermediate chain 2, cytosolic (Fragment) OS=Macaca mul	7	2	2	2	19.8	17.778			14315000			10679000
F7GZM1	Protein LSM12 homolog	LSM12	F7GZM1;G7NIW7;A0A1D5QNK6;A0A1D5Q8B7	F7GZM1_MACMU Protein LSM12 homolog OS=Macaca mulatta OX=9544 GN=LSM12 PE=2 SV=1;G7NIW7_MACMU Uncharacterized protein OS=Macaca mulatta OX=9544 GN=EGK_08792 PE=4 SV=1;A0A1D5QNK6_MACMU Uncharacterized protein OS=Macaca mulatta OX=9544 GN=LSM12 PE=4 SV=1;A0A1	4	2	2	2	11.3	21.701			10553000	13004000	13207000	11489000
F7H1P3	Uncharacterized protein	SIRT2	F7H1P3;A0A1D5QW78;F7H1P9;G7NNJ4;F7H1P7;A0A1D5QNQ0;H9YXU3;H9FRI7	F7H1P3_MACMU Uncharacterized protein OS=Macaca mulatta OX=9544 GN=SIRT2 PE=4 SV=2;A0A1D5QW78_MACMU NAD-dependent protein deacetylase OS=Macaca mulatta OX=9544 GN=SIRT2 PE=3 SV=1;F7H1P9_MACMU NAD-dependent protein deacetylase OS=Macaca mulatta OX=9544 GN=SI	8	1	1	1	5.1	26.712	15248000	17714000	13294000	23798000	17648000	16698000		17403000
A0A1D5QNR9	Uncharacterized protein	ABCD3	A0A1D5QNR9;F6QHX4;H9ESW8;A0A1D5RAV7;G7MI37	A0A1D5QNR9_MACMU Uncharacterized protein OS=Macaca mulatta OX=9544 GN=ABCD3 PE=4 SV=1;F6QHX4_MACMU Uncharacterized protein OS=Macaca mulatta OX=9544 GN=ABCD3 PE=4 SV=2;H9ESW8_MACMU ATP-binding cassette sub-family D member 3 isoform a OS=Macaca mulatta OX=9	5	4	4	4	8.9	62.193		31113000	36319000	51868000	54428000	31752000		33738000
A0A1D5QNU1	Uncharacterized protein	NAA10	A0A1D5QNU1;F6YUM0;F7GKH3;G7NSK4;H9EN92;F7GKG6	A0A1D5QNU1_MACMU Uncharacterized protein OS=Macaca mulatta OX=9544 GN=NAA10 PE=4 SV=1;F6YUM0_MACMU Uncharacterized protein OS=Macaca mulatta OX=9544 GN=NAA10 PE=4 SV=2;F7GKH3_MACMU Uncharacterized protein OS=Macaca mulatta OX=9544 GN=NAA10 PE=4 SV=1;G7NSK4	6	3	1	3	13.5	22.62	30702000		38299000	24637000	46918000	19748000
A0A1D5R3G3	Uncharacterized protein	ANK3	A0A1D5R3G3;A0A1D5QP09;F7EMR3;F7EBU2;G7N2F0;F7EBU8;F7EMN9;A0A1D5QSJ7;F7EBV3;I2CWW4;I0FR20;F7EMQ6;A0A1D5R0H9;A0A1D5QZ97;H9FHJ1	A0A1D5R3G3_MACMU Uncharacterized protein OS=Macaca mulatta OX=9544 GN=ANK3 PE=4 SV=1;A0A1D5QP09_MACMU Uncharacterized protein OS=Macaca mulatta OX=9544 GN=ANK3 PE=4 SV=1;F7EMR3_MACMU Uncharacterized protein OS=Macaca mulatta OX=9544 GN=ANK3 PE=4 SV=2;F7EBU	15	23	18	23	7.9	477.13	563340000	485020000	325750000	463160000	281090000	386910000	596920000	709020000	517900000
A0A1D5QP24	Uncharacterized protein	LOC100426633	A0A1D5QP24;H9FVC9;A0A1D5R8S3;A0A1D5R2M8	A0A1D5QP24_MACMU Uncharacterized protein OS=Macaca mulatta OX=9544 GN=LOC100426633 PE=4 SV=1;H9FVC9_MACMU Transmembrane protein 69 OS=Macaca mulatta OX=9544 GN=TMEM69 PE=2 SV=1;A0A1D5R8S3_MACMU Uncharacterized protein OS=Macaca mulatta OX=9544 GN=TMEM69 PE	4	1	1	1	5.4	27.069	117680000	90500000	70519000	102460000	49939000	128160000	65462000	74289000	135140000
A0A1D5QP46	Uncharacterized protein	SLC25A13	A0A1D5QP46;F7BR40;G7MLU4	A0A1D5QP46_MACMU Uncharacterized protein OS=Macaca mulatta OX=9544 GN=SLC25A13 PE=3 SV=1;F7BR40_MACMU Calcium-binding mitochondrial carrier protein Aralar2 isoform 2 OS=Macaca mulatta OX=9544 GN=SLC25A13 PE=2 SV=2;G7MLU4_MACMU Uncharacterized protein OS=Ma	3	6	3	3	9.4	73.996	301350000	352190000	202410000	282170000	211700000	313290000	328950000	269680000	374380000
A0A1D5QP80	Uncharacterized protein	LOC100428978	A0A1D5QP80;I2CYD8;G8F1D2;Q6DN04;H9F3N6	A0A1D5QP80_MACMU Uncharacterized protein OS=Macaca mulatta OX=9544 GN=LOC100428978 PE=4 SV=1;I2CYD8_MACMU Macrophage migration inhibitory factor OS=Macaca mulatta OX=9544 GN=MIF PE=2 SV=1;G8F1D2_MACMU Uncharacterized protein OS=Macaca mulatta OX=9544 GN=EG	5	2	2	2	18.5	11.796	232280000	284740000	592070000	319330000	530710000	412120000	129140000	247510000	237880000
F6SJD2	Uncharacterized protein	CZIB	F6SJD2;A0A1D5QP85;G7MH67;H9FWC2	F6SJD2_MACMU Uncharacterized protein OS=Macaca mulatta OX=9544 GN=CZIB PE=4 SV=2;A0A1D5QP85_MACMU Uncharacterized protein OS=Macaca mulatta OX=9544 GN=CZIB PE=4 SV=1;G7MH67_MACMU Uncharacterized protein (Fragment) OS=Macaca mulatta OX=9544 GN=EGK_00779 PE=	4	2	2	2	29	15.825	37345000	45147000	57120000	47768000	51722000			36752000	44104000
A0A1D5QP93	Uncharacterized protein	CNRIP1	A0A1D5QP93;F7G8D9	A0A1D5QP93_MACMU Uncharacterized protein OS=Macaca mulatta OX=9544 GN=CNRIP1 PE=4 SV=1;F7G8D9_MACMU CB1 cannabinoid receptor-interacting protein 1 isoform CRIP1a OS=Macaca mulatta OX=9544 GN=CNRIP1 PE=2 SV=1	2	2	2	2	14.8	14.12	92580000	125130000	49229000	138800000	68362000	111130000	110190000	88923000	79856000
A0A1D5QP94	Uncharacterized protein	BCL2L2-PABPN1	A0A1D5QP94;I2CTJ7;F7G4K4;H9FC84;F7G4L5;A0A1D5QA53	A0A1D5QP94_MACMU Uncharacterized protein OS=Macaca mulatta OX=9544 GN=BCL2L2-PABPN1 PE=4 SV=1;I2CTJ7_MACMU Polyadenylate-binding protein 2 OS=Macaca mulatta OX=9544 GN=PABPN1 PE=2 SV=1;F7G4K4_MACMU Uncharacterized protein OS=Macaca mulatta OX=9544 GN=BCL2L	6	2	2	2	9.4	31.418			49146000		34435000	14658000
A0A1D5QPB7	Extended synaptotagmin-1 isoform 2	ESYT1	A0A1D5QPB7;G7N7B4;F6RSH0;A0A1D5RKU9	A0A1D5QPB7_MACMU Extended synaptotagmin-1 isoform 2 OS=Macaca mulatta OX=9544 GN=ESYT1 PE=2 SV=1;G7N7B4_MACMU Uncharacterized protein OS=Macaca mulatta OX=9544 GN=EGK_03788 PE=4 SV=1;F6RSH0_MACMU Uncharacterized protein OS=Macaca mulatta OX=9544 GN=ESYT1 P	4	13	13	13	17.8	122.66	370100000	303470000	273200000	254930000	270730000	324660000	346460000	250600000	252910000
A0A1D5QPG0	Uncharacterized protein	SNRPF	A0A1D5QPG0;H9FYU2;F7H1G3	A0A1D5QPG0_MACMU Uncharacterized protein OS=Macaca mulatta OX=9544 GN=SNRPF PE=3 SV=1;H9FYU2_MACMU Small nuclear ribonucleoprotein F OS=Macaca mulatta OX=9544 GN=SNRPF PE=2 SV=1;F7H1G3_MACMU Small nuclear ribonucleoprotein F OS=Macaca mulatta OX=9544 GN=SN	3	1	1	1	15.3	9.62			43689000	45119000	58886000
I0FPB0	Cytochrome c oxidase subunit 4 isoform 1, mitochondrial	COX4I1	I0FPB0;I0FPA8;H9Z5C4;A0A1D5QPJ7;H9FQ06;H9FQ04;F7HCZ5;A0A1D5QB96;A0A1D5QPC1;A0A1D5QZX7	I0FPB0_MACMU Cytochrome c oxidase subunit 4 isoform 1, mitochondrial OS=Macaca mulatta OX=9544 GN=COX4I1 PE=2 SV=1;I0FPA8_MACMU Cytochrome c oxidase subunit 4 isoform 1, mitochondrial OS=Macaca mulatta OX=9544 GN=COX4I1 PE=2 SV=1;H9Z5C4_MACMU Cytochrome c	10	14	14	14	59.2	19.688	13443000000	14678000000	10059000000	12936000000	13253000000	16212000000	11355000000	15535000000	14049000000
A0A1D5QPK0	Tubulin beta chain	TUBB4A	A0A1D5QPK0;A0A1D5R5Y6;A0A1D5QVM3;A0A1D5RL27;F7A716;F7E840;A0A1D5R9L9;A0A1D5QSC6;A0A1D5QE70	A0A1D5QPK0_MACMU Tubulin beta chain OS=Macaca mulatta OX=9544 GN=TUBB4A PE=3 SV=1;A0A1D5R5Y6_MACMU Tubulin beta chain OS=Macaca mulatta OX=9544 GN=TUBB4A PE=3 SV=1	9	17	0	1	54.3	49.585		6373400	29287000	25707000	36181000
A0A1D5QPK8	Uncharacterized protein	FLNC	A0A1D5QPK8;F7GZ17;G7MMB8	A0A1D5QPK8_MACMU Uncharacterized protein OS=Macaca mulatta OX=9544 GN=FLNC PE=4 SV=1;F7GZ17_MACMU Uncharacterized protein OS=Macaca mulatta OX=9544 GN=FLNC PE=4 SV=2	3	122	0	122	58.9	289.13	14748000000	18656000000	17429000000	13663000000	16803000000	25777000000	57172000000	27140000000	22377000000
G7NAW3	Uncharacterized protein	EGK_05664	G7NAW3;F7GX99;H9YUU3;H9ES95;A0A1D5R632;A0A1D5R7D0;A0A1D5QPP0;A0A1D5R900	G7NAW3_MACMU Uncharacterized protein OS=Macaca mulatta OX=9544 GN=EGK_05664 PE=3 SV=1;F7GX99_MACMU Uncharacterized protein OS=Macaca mulatta OX=9544 GN=SEPTIN10 PE=3 SV=2;H9YUU3_MACMU Septin-10 isoform 2 OS=Macaca mulatta OX=9544 GN=SEPTIN10 PE=2 SV=1;H9ES	8	2	2	2	5.6	43.43	100770000	116680000	104100000	106440000	95488000	64303000	96320000		106400000
A0A1D5QPW8	Uncharacterized protein	MLF1	A0A1D5QPW8;F7C709;F7C722;H9FUL1;F7C6Z3;G7MJE8	A0A1D5QPW8_MACMU Uncharacterized protein OS=Macaca mulatta OX=9544 GN=MLF1 PE=4 SV=1;F7C709_MACMU Uncharacterized protein OS=Macaca mulatta OX=9544 GN=MLF1 PE=4 SV=2;F7C722_MACMU Uncharacterized protein OS=Macaca mulatta OX=9544 GN=MLF1 PE=4 SV=1;H9FUL1_MA	6	2	2	2	12.1	23.091
A0A1D5QPZ4	Uncharacterized protein	LOC711964	A0A1D5QPZ4	A0A1D5QPZ4_MACMU Uncharacterized protein OS=Macaca mulatta OX=9544 GN=LOC711964 PE=3 SV=1	1	1	1	1	10.3	17.433	31359000							21700000	93689000
A0A1D5QQ04	Immunoglobulin kappa constant	IGKC	A0A1D5QQ04	A0A1D5QQ04_MACMU Immunoglobulin kappa constant OS=Macaca mulatta OX=9544 GN=IGKC PE=4 SV=1	1	3	3	3	36.2	11.425	395960000	367410000	722980000	196240000	15223000	1148000000		878910000	662600000
F6ZBZ9	Coatomer subunit epsilon isoform b	COPE	F6ZBZ9;H9F915;G7NNF6;A0A1D5QQ24;F6ZC24;F7FFE8;F7FFE3	F6ZBZ9_MACMU Coatomer subunit epsilon isoform b OS=Macaca mulatta OX=9544 GN=COPE PE=2 SV=1;H9F915_MACMU Coatomer subunit epsilon isoform a (Fragment) OS=Macaca mulatta OX=9544 GN=COPE PE=2 SV=1;G7NNF6_MACMU Coatomer subunit epsilon OS=Macaca mulatta OX=95	7	3	3	3	22.2	28.798	53847000	61234000	66614000	34918000	70633000		63870000	44589000	46446000
G7NNG7	Brain link protein 2 (Fragment)	EGK_10357	G7NNG7;H9FIM6;G7MYR9;F6ZXE2;A0A1D5QQ66;F6UI16;F6ZXD2	G7NNG7_MACMU Brain link protein 2 (Fragment) OS=Macaca mulatta OX=9544 GN=EGK_10357 PE=4 SV=1;H9FIM6_MACMU Hyaluronan and proteoglycan link protein 4 (Fragment) OS=Macaca mulatta OX=9544 GN=HAPLN4 PE=2 SV=1;G7MYR9_MACMU Hyaluronan and proteoglycan link pro	7	1	1	1	3.1	31.387			53134000
H9F7N6	Peptidyl-tRNA hydrolase 2, mitochondrial (Fragment)	PTRH2	H9F7N6;F7GV88;A0A1D5QQ67	H9F7N6_MACMU Peptidyl-tRNA hydrolase 2, mitochondrial (Fragment) OS=Macaca mulatta OX=9544 GN=PTRH2 PE=2 SV=1;F7GV88_MACMU Peptidyl-tRNA hydrolase 2, mitochondrial OS=Macaca mulatta OX=9544 GN=PTRH2 PE=2 SV=1;A0A1D5QQ67_MACMU Uncharacterized protein OS=Mac	3	1	1	1	10.1	16.056	14019000	38798000	37661000	36503000	47226000		19897000	26745000	52940000
H9Z053	Tyrosine-protein phosphatase non-receptor type	PTPN11	H9Z053;H9FXT1;A0A1D5QQ90;A0A1D5QYU2;A0A1D5QNN6;F6ZJD8;A0A1D5QXX2	H9Z053_MACMU Tyrosine-protein phosphatase non-receptor type OS=Macaca mulatta OX=9544 GN=PTPN11 PE=2 SV=1;H9FXT1_MACMU Tyrosine-protein phosphatase non-receptor type OS=Macaca mulatta OX=9544 GN=PTPN11 PE=2 SV=1;A0A1D5QQ90_MACMU Tyrosine-protein phosphatas	7	5	5	5	9.9	68.01		53820000	52060000	65663000	74236000	81696000		54289000	36374000
A0A1D5QQA3	Uncharacterized protein	GGT5	A0A1D5QQA3;H9H482;G8F1Q4;H9Z2M1	A0A1D5QQA3_MACMU Uncharacterized protein OS=Macaca mulatta OX=9544 GN=GGT5 PE=4 SV=1;H9H482_MACMU Uncharacterized protein OS=Macaca mulatta OX=9544 GN=GGT5 PE=4 SV=2;G8F1Q4_MACMU Uncharacterized protein OS=Macaca mulatta OX=9544 GN=EGK_21405 PE=4 SV=1;H9Z2	4	1	1	1	2.2	58.805	5724600	4435700							6945200
A0A1D5QQE4	Uncharacterized protein	EPDR1	A0A1D5QQE4;A0A1D5R1D9;F7C9F5	A0A1D5QQE4_MACMU Uncharacterized protein OS=Macaca mulatta OX=9544 GN=EPDR1 PE=4 SV=1;A0A1D5R1D9_MACMU Uncharacterized protein OS=Macaca mulatta OX=9544 GN=EPDR1 PE=4 SV=1;F7C9F5_MACMU Uncharacterized protein OS=Macaca mulatta OX=9544 GN=EGK_13764 PE=4 SV=	3	1	1	1	12.2	9.9135		42716000		26390000		22391000			43626000
I0FPJ2	Alanyl-tRNA synthetase, cytoplasmic	AARS	I0FPJ2;H9YX87;H9FQK6;A0A1D5QQI4;F7F9L6;A0A1D5Q0C8;G7NR10	I0FPJ2_MACMU Alanyl-tRNA synthetase, cytoplasmic OS=Macaca mulatta OX=9544 GN=AARS PE=2 SV=1;H9YX87_MACMU Alanyl-tRNA synthetase, cytoplasmic OS=Macaca mulatta OX=9544 GN=AARS PE=2 SV=1;H9FQK6_MACMU Alanyl-tRNA synthetase, cytoplasmic OS=Macaca mulatta OX=	7	4	4	4	4.1	106.71			50104000	66037000	81691000	42766000		22426000	31563000
A0A1D5QQJ3	Uncharacterized protein	CHN1	A0A1D5QQJ3;F7GRZ6;A0A1D5QR50;H9FPD8;G7N8C7;F7ESU8;F7ET58	A0A1D5QQJ3_MACMU Uncharacterized protein OS=Macaca mulatta OX=9544 GN=CHN1 PE=4 SV=1;F7GRZ6_MACMU Uncharacterized protein OS=Macaca mulatta OX=9544 GN=CHN1 PE=4 SV=1;A0A1D5QR50_MACMU Uncharacterized protein OS=Macaca mulatta OX=9544 GN=CHN1 PE=4 SV=1;H9FPD	7	1	1	1	6.6	20.856	19370000	17871000		12680000	12256000	17606000	18377000	17666000	9921700
A0A1D5QQL8	Uncharacterized protein	DNAJA4	A0A1D5QQL8;H9ER66;F7DDU9;G7MYF6;A0A1D5RJQ6	A0A1D5QQL8_MACMU Uncharacterized protein OS=Macaca mulatta OX=9544 GN=DNAJA4 PE=4 SV=1;H9ER66_MACMU DnaJ homolog subfamily A member 4 isoform 1 OS=Macaca mulatta OX=9544 GN=DNAJA4 PE=2 SV=1;F7DDU9_MACMU Uncharacterized protein OS=Macaca mulatta OX=9544 GN=	5	5	5	5	14.6	41.62	97732000	124100000	57672000	95170000	104740000	82849000	192370000	115050000	124730000
A0A1D5QQM1	Uncharacterized protein	PSMD5	A0A1D5QQM1;H9FXG7;G7NG21;F6WEF0;F7HB80	A0A1D5QQM1_MACMU Uncharacterized protein OS=Macaca mulatta OX=9544 GN=PSMD5 PE=4 SV=1;H9FXG7_MACMU 26S proteasome non-ATPase regulatory subunit 5 OS=Macaca mulatta OX=9544 GN=PSMD5 PE=2 SV=1;G7NG21_MACMU 26S proteasome non-ATPase regulatory subunit 5 OS=Ma	5	6	6	6	15	51.228	57058000	81821000	98246000	74802000	64109000	44282000	59354000	51544000	50579000
A0A1D5QQM7	Uncharacterized protein	LOC698256	A0A1D5QQM7;I2CYA9;F7GZS2;G7N957;A0A1D5Q4B0;A0A1D5RCX4;A0A1D5Q6M4;F7B4W4;A0A1D5RIM1;G7NAV7;A0A1D5R8C3;A0A1D5QKQ6	A0A1D5QQM7_MACMU Uncharacterized protein OS=Macaca mulatta OX=9544 GN=LOC698256 PE=4 SV=1;I2CYA9_MACMU Prothymosin alpha isoform 2 OS=Macaca mulatta OX=9544 GN=PTMA PE=2 SV=1;F7GZS2_MACMU Uncharacterized protein OS=Macaca mulatta OX=9544 GN=LOC693785 PE=4	12	6	6	6	36.7	11.944	192140000	684810000	1891300000	2084000000	2517800000	1263200000	373600000	346180000	250320000
A0A1D5QQQ1	Uncharacterized protein	TECR	A0A1D5QQQ1;I0FWL3;H9Z0H8;F7E425;A0A1D5R8S9;H9F221;G7NM02;A0A1D5RAC1;F7B8P8	A0A1D5QQQ1_MACMU Uncharacterized protein OS=Macaca mulatta OX=9544 GN=TECR PE=4 SV=1;I0FWL3_MACMU Trans-2,3-enoyl-CoA reductase OS=Macaca mulatta OX=9544 GN=TECR PE=2 SV=1;H9Z0H8_MACMU Trans-2,3-enoyl-CoA reductase OS=Macaca mulatta OX=9544 GN=TECR PE=2 SV	9	3	3	3	8.7	34.945			15289000	10198000					6070700
A0A1D5QQW6	RuvB-like helicase	RUVBL1	A0A1D5QQW6;F6VIT7;F6ZZE0	A0A1D5QQW6_MACMU RuvB-like helicase OS=Macaca mulatta OX=9544 GN=RUVBL1 PE=2 SV=1;F6VIT7_MACMU RuvB-like helicase OS=Macaca mulatta OX=9544 GN=RUVBL1 PE=3 SV=2;F6ZZE0_MACMU RuvB-like helicase OS=Macaca mulatta OX=9544 GN=RUVBL1 PE=3 SV=2	3	8	8	8	24.8	50.227	155690000	155920000	230820000	237310000	398700000	156110000	153260000	111320000	131180000
A0A1D5QQX5	Elongation factor 2	EEF2	A0A1D5QQX5;I0FPR5;A0A1D5R3U7	A0A1D5QQX5_MACMU Elongation factor 2 OS=Macaca mulatta OX=9544 GN=EEF2 PE=2 SV=1;I0FPR5_MACMU Elongation factor 2 OS=Macaca mulatta OX=9544 GN=EEF2 PE=2 SV=1	3	38	1	38	53.7	95.323	3189800000	3967900000	6615000000	6845100000	10109000000	5429600000	4689300000	2643900000	2645000000
A0A1D5QQZ2	Prelamin-A/C isoform 1	LMNA	A0A1D5QQZ2;F7GLE2;F6W890;F7GLD0;F7GLE9;F6W898;F7GLD7	A0A1D5QQZ2_MACMU Prelamin-A/C isoform 1 OS=Macaca mulatta OX=9544 GN=LMNA PE=2 SV=1;F7GLE2_MACMU Uncharacterized protein OS=Macaca mulatta OX=9544 GN=LMNA PE=3 SV=1;F6W890_MACMU Uncharacterized protein OS=Macaca mulatta OX=9544 GN=LMNA PE=3 SV=2;F7GLD0_MAC	7	44	42	44	64.6	74.07	8536000000	10253000000	11691000000	7434800000	8045300000	6717700000	8286300000	7152300000	6967700000
H9EWW4	Methylcrotonoyl-CoA carboxylase beta chain, mitochondrial	MCCC2	H9EWW4;G7MU90;A0A1D5QR02;A0A1D5R2V7;F6WID2	H9EWW4_MACMU Methylcrotonoyl-CoA carboxylase beta chain, mitochondrial OS=Macaca mulatta OX=9544 GN=MCCC2 PE=2 SV=1;G7MU90_MACMU Methylcrotonoyl-CoA carboxylase beta chain, mitochondrial OS=Macaca mulatta OX=9544 GN=EGK_16565 PE=4 SV=1;A0A1D5QR02_MACMU Unc	5	19	19	19	44.9	61.327	1320800000	1234300000	697720000	947750000	919090000	1035200000	1150900000	977080000	1564100000
A0A1D5RJC9	Transgelin	TAGLN2	A0A1D5RJC9;G7ME58;F6RKI4;A0A1D5QR26	A0A1D5RJC9_MACMU Transgelin OS=Macaca mulatta OX=9544 GN=TAGLN2 PE=2 SV=1;G7ME58_MACMU Transgelin OS=Macaca mulatta OX=9544 GN=EGK_01490 PE=3 SV=1;F6RKI4_MACMU Transgelin OS=Macaca mulatta OX=9544 GN=TAGLN2 PE=3 SV=2;A0A1D5QR26_MACMU Transgelin OS=Macaca m	4	14	13	14	74.9	22.391	977290000	1067400000	3839700000	1979700000	3065900000	1446600000	886550000	599960000	751760000
A0A1D5QRD8	Uncharacterized protein	HOMER1	A0A1D5QRD8;F7HNS6;F7HNK6;G7MUU8;H9EPI5;A0A1D5R084;F7HNK9	A0A1D5QRD8_MACMU Uncharacterized protein OS=Macaca mulatta OX=9544 GN=HOMER1 PE=4 SV=1;F7HNS6_MACMU Uncharacterized protein OS=Macaca mulatta OX=9544 GN=HOMER1 PE=4 SV=1;F7HNK6_MACMU Uncharacterized protein OS=Macaca mulatta OX=9544 GN=HOMER1 PE=4 SV=2;G7M	7	3	3	3	14.6	20.661						6435800
A0A1D5R9G4	Uncharacterized protein	C14H11orf58	A0A1D5R9G4;A0A1D5QRF5;F6W3H8	A0A1D5R9G4_MACMU Uncharacterized protein OS=Macaca mulatta OX=9544 GN=C14H11orf58 PE=4 SV=1;A0A1D5QRF5_MACMU Uncharacterized protein OS=Macaca mulatta OX=9544 GN=C14H11orf58 PE=4 SV=1;F6W3H8_MACMU Small acidic protein OS=Macaca mulatta OX=9544 GN=C14H11orf	3	1	1	1	17.8	10.038					17449000
F6W9A8	Uncharacterized protein	NDUFB5	F6W9A8;H9F2X6;A0A1D5QRG4;F6ZQ85	F6W9A8_MACMU Uncharacterized protein OS=Macaca mulatta OX=9544 GN=NDUFB5 PE=4 SV=1;H9F2X6_MACMU NADH dehydrogenase [ubiquinone] 1 beta subcomplex subunit 5, mitochondrial isoform 1 (Fragment) OS=Macaca mulatta OX=9544 GN=NDUFB5 PE=2 SV=1;A0A1D5QRG4_MACMU U	4	7	7	7	38.7	15.737	1381400000	1695100000	1024700000	1245700000	1003600000	881650000	1118500000	1367100000	1330500000
A0A1D5QRH9	Uncharacterized protein	OXNAD1	A0A1D5QRH9	A0A1D5QRH9_MACMU Uncharacterized protein OS=Macaca mulatta OX=9544 GN=OXNAD1 PE=4 SV=1	1	1	1	1	3	36.864	28467000	28059000				38851000	28041000	30323000	24099000
F7H3K9	Structural maintenance of chromosomes protein	SMC1A	F7H3K9;A0A1D5QRI6;G7NRH2;H9ZE32	F7H3K9_MACMU Structural maintenance of chromosomes protein OS=Macaca mulatta OX=9544 GN=SMC1A PE=3 SV=2;A0A1D5QRI6_MACMU Structural maintenance of chromosomes protein OS=Macaca mulatta OX=9544 GN=SMC1A PE=3 SV=1;G7NRH2_MACMU Structural maintenance of chrom	4	3	3	3	1.9	135.78	594420000	261010000	210090000	208700000	28408000	299480000	219330000	255910000	216750000
A0A1D5R633	Uncharacterized protein	UBQLN2	A0A1D5R633;A0A1D5QRK1;F6TBT9	A0A1D5R633_MACMU Uncharacterized protein OS=Macaca mulatta OX=9544 GN=UBQLN2 PE=4 SV=1;A0A1D5QRK1_MACMU Uncharacterized protein OS=Macaca mulatta OX=9544 GN=UBQLN2 PE=4 SV=1;F6TBT9_MACMU Protein linking IAP with cytoskeleton 2 OS=Macaca mulatta OX=9544 GN=	3	3	1	1	8.6	58.953
F6T4F2	Uncharacterized protein	PDIA6	F6T4F2;A0A1D5RHH6;A0A1D5QRL3;F6ZB86;F6T4D4;G7NBA4;A0A1D5QVG0	F6T4F2_MACMU Uncharacterized protein OS=Macaca mulatta OX=9544 GN=PDIA6 PE=3 SV=2;A0A1D5RHH6_MACMU Uncharacterized protein OS=Macaca mulatta OX=9544 GN=PDIA6 PE=3 SV=1;A0A1D5QRL3_MACMU Protein disulfide-isomerase A6 OS=Macaca mulatta OX=9544 GN=PDIA6 PE=2	7	12	12	12	39.1	47.817	315690000	358210000	700180000	564250000	824540000	468410000	423930000	263540000	308170000
F6ZXX7	ATPase inhibitor, mitochondrial isoform 1	ATP5IF1	F6ZXX7;A0A1D5QRM5;F6ZXX1	F6ZXX7_MACMU ATPase inhibitor, mitochondrial isoform 1 OS=Macaca mulatta OX=9544 GN=ATP5IF1 PE=2 SV=1;A0A1D5QRM5_MACMU Uncharacterized protein OS=Macaca mulatta OX=9544 GN=ATP5IF1 PE=4 SV=1	3	3	3	3	15.1	12.247	951790000	1201100000	508600000	579760000	921850000	783300000	893030000	1297300000	841350000
A0A1D5QRS8	Uncharacterized protein	CD36	A0A1D5QRS8;Q6J512;G7MM03;A0A1D5QBI7;A0A1D5REZ2;A0A1D5R7R8;A0A1D5RK24	A0A1D5QRS8_MACMU Uncharacterized protein OS=Macaca mulatta OX=9544 GN=CD36 PE=3 SV=1;Q6J512_MACMU CD36 molecule OS=Macaca mulatta OX=9544 GN=CD36 PE=2 SV=1;G7MM03_MACMU Uncharacterized protein OS=Macaca mulatta OX=9544 GN=EGK_13986 PE=3 SV=1;A0A1D5QBI7_MAC	7	8	8	8	28.6	48.561	1044200000	1064900000	510740000	836180000	687460000	871210000	1208800000	1596300000	910720000
H9FY61	60S ribosomal protein L26	RPL26	H9FY61;F7F4S1;A0A1D5QRZ8;F7E8Y5;I0FK87;F6V6Z8;F7HSS2;G7N2D5;F7FBY2;G7MNJ8	H9FY61_MACMU 60S ribosomal protein L26 OS=Macaca mulatta OX=9544 GN=RPL26 PE=2 SV=1;F7F4S1_MACMU 60S ribosomal protein L26 OS=Macaca mulatta OX=9544 GN=RPL26 PE=2 SV=2;A0A1D5QRZ8_MACMU Uncharacterized protein OS=Macaca mulatta OX=9544 GN=LOC696134 PE=4 SV=	10	6	6	6	28.3	17.197	230720000	258100000	397070000	395940000	633940000	295560000	320590000	182960000	214930000
G7N5L6	Tetraspanin (Fragment)	EGK_03266	G7N5L6;A0A1D5QS02;A0A1D5RBZ6;F7GKZ6	G7N5L6_MACMU Tetraspanin (Fragment) OS=Macaca mulatta OX=9544 GN=EGK_03266 PE=3 SV=1;A0A1D5QS02_MACMU Tetraspanin OS=Macaca mulatta OX=9544 GN=CD9 PE=2 SV=1	4	3	3	3	8	23.518	70640000	94437000	195140000	46354000	54586000	49247000	104310000	41699000	49103000
A0A1D5QZ99	Uncharacterized protein	NQO1	A0A1D5QZ99;F7CGF2;F6RW20;G7NQM5;F6RW03;A0A1D5QSF4	A0A1D5QZ99_MACMU Uncharacterized protein OS=Macaca mulatta OX=9544 GN=NQO1 PE=4 SV=1;F7CGF2_MACMU Uncharacterized protein OS=Macaca mulatta OX=9544 GN=NQO1 PE=4 SV=2;F6RW20_MACMU Uncharacterized protein OS=Macaca mulatta OX=9544 GN=NQO1 PE=4 SV=2;G7NQM5_MA	6	6	6	6	31.2	22.76	109680000	165730000	199210000	109300000	174530000	119470000	55306000	131390000	84042000
G7NMJ0	MICOS complex subunit MIC13	MICOS13	G7NMJ0;A0A1D5QSH8;A0A1D5QQ28	G7NMJ0_MACMU MICOS complex subunit MIC13 OS=Macaca mulatta OX=9544 GN=MICOS13 PE=2 SV=1;A0A1D5QSH8_MACMU MICOS complex subunit MIC13 OS=Macaca mulatta OX=9544 GN=MICOS13 PE=3 SV=1;A0A1D5QQ28_MACMU MICOS complex subunit MIC13 OS=Macaca mulatta OX=9544 GN=MI	3	4	4	4	68.6	13.055	625380000	697170000	436820000	605360000	614850000	681260000	616130000	712140000	774410000
H9FJG4	Polypeptide N-acetylgalactosaminyltransferase-like 6 (Fragment)	GALNTL6	H9FJG4;A0A1D5QSI4;F7DBP1;A0A1D5RAZ8	H9FJG4_MACMU Polypeptide N-acetylgalactosaminyltransferase-like 6 (Fragment) OS=Macaca mulatta OX=9544 GN=GALNTL6 PE=2 SV=1;A0A1D5QSI4_MACMU Polypeptide N-acetylgalactosaminyltransferase OS=Macaca mulatta OX=9544 GN=GALNTL6 PE=3 SV=1;F7DBP1_MACMU Polypepti	4	2	2	2	4.8	38.731	174540000	174140000	74111000	81772000	78526000	159110000	170230000	149480000	141840000
A0A1D5QSI7	ATP-citrate synthase	ACLY	A0A1D5QSI7;H9FUT4;F6YSF2;I0FI00;H9FUT3;G7NIJ9;A0A1D5QVG7;F6UMH7;Q3YAQ8	A0A1D5QSI7_MACMU ATP-citrate synthase OS=Macaca mulatta OX=9544 GN=ACLY PE=3 SV=1;H9FUT4_MACMU ATP-citrate synthase OS=Macaca mulatta OX=9544 GN=ACLY PE=2 SV=1;F6YSF2_MACMU ATP-citrate synthase OS=Macaca mulatta OX=9544 GN=ACLY PE=3 SV=2;I0FI00_MACMU ATP-c	9	11	11	11	14.1	118.55	81402000	64669000	269800000	189280000	491150000	91314000	34611000	8768200
F6RJJ7	Peptidylprolyl isomerase	FKBP2	F6RJJ7;A0A1D5QSN2	F6RJJ7_MACMU Peptidylprolyl isomerase OS=Macaca mulatta OX=9544 GN=FKBP2 PE=2 SV=1;A0A1D5QSN2_MACMU Peptidylprolyl isomerase OS=Macaca mulatta OX=9544 GN=FKBP2 PE=4 SV=1	2	2	2	2	28.2	15.587	67569000	75670000	93401000	123890000	120550000	104950000	104600000	116710000	88900000
A0A1D5QSQ9	Uncharacterized protein	TMED7	A0A1D5QSQ9;H9ESZ1;G7MVK3;F6UU63	A0A1D5QSQ9_MACMU Uncharacterized protein OS=Macaca mulatta OX=9544 GN=TMED7 PE=3 SV=1;H9ESZ1_MACMU Transmembrane emp24 domain-containing protein 7 OS=Macaca mulatta OX=9544 GN=TMED7 PE=2 SV=1;G7MVK3_MACMU Uncharacterized protein (Fragment) OS=Macaca mulatt	4	1	1	1	5.3	21.106	25089000	28108000	16638000	17320000	20107000	16349000	35557000	33127000	20402000
A0A1D5QST3	Uncharacterized protein	NSFL1C	A0A1D5QST3;H9FBJ4;I0FG44;F6XMH7;A0A1D5QYL5;G7N2R5;A0A1D5QYE3;A0A1D5R5Q0	A0A1D5QST3_MACMU Uncharacterized protein OS=Macaca mulatta OX=9544 GN=NSFL1C PE=4 SV=1;H9FBJ4_MACMU NSFL1 cofactor p47 isoform a (Fragment) OS=Macaca mulatta OX=9544 GN=NSFL1C PE=2 SV=1;I0FG44_MACMU NSFL1 cofactor p47 isoform a OS=Macaca mulatta OX=9544 GN	8	10	10	10	42.7	36.816	52797000	55947000			52245000	35556000	59608000	43022000	43442000
A0A1D5QSV7	Uncharacterized protein	HARS	A0A1D5QSV7;A0A1D5RGD7;F7GIE0;A0A1D5RA96;G7MUZ2	A0A1D5QSV7_MACMU Uncharacterized protein OS=Macaca mulatta OX=9544 GN=HARS PE=4 SV=1;A0A1D5RGD7_MACMU Uncharacterized protein OS=Macaca mulatta OX=9544 GN=HARS PE=4 SV=1;F7GIE0_MACMU Uncharacterized protein OS=Macaca mulatta OX=9544 GN=HARS PE=4 SV=2;A0A1D	5	2	1	1	6.1	43.902		17069000	19351000	34332000	35407000	18422000
A0A1D5QSX5	Uncharacterized protein	DMAC1	A0A1D5QSX5;F6TQB7	A0A1D5QSX5_MACMU Uncharacterized protein OS=Macaca mulatta OX=9544 GN=DMAC1 PE=4 SV=1;F6TQB7_MACMU Uncharacterized protein OS=Macaca mulatta OX=9544 GN=EGK_07708 PE=4 SV=1	2	4	4	4	40.2	11.963	329030000	349210000	231200000	360260000	391860000	450290000	342270000	327690000	361080000
A0A1D5QT60	Elongation factor 1-gamma	EEF1G	A0A1D5QT60;F7HML3;H9F9E6;G7NCU1;A0A1D5QWY2;A0A1D5QQH5;A0A1D5QX81;A0A1D5QW28;A0A1D5Q0J7	A0A1D5QT60_MACMU Elongation factor 1-gamma OS=Macaca mulatta OX=9544 GN=EEF1G PE=2 SV=1;F7HML3_MACMU Uncharacterized protein OS=Macaca mulatta OX=9544 GN=EEF1G PE=4 SV=2;H9F9E6_MACMU Elongation factor 1-gamma (Fragment) OS=Macaca mulatta OX=9544 GN=EEF1G P	9	21	21	21	48.5	50.092	1012700000	924870000	1644500000	1829600000	2908700000	1477000000	971080000	721430000	915390000
A0A1D5QTA6	Isocitrate dehydrogenase [NAD] subunit, mitochondrial	IDH3G	A0A1D5QTA6;G7NSJ9;F7E8B9;H9FTW9;A0A1D5RGN0;H9EVD1	A0A1D5QTA6_MACMU Isocitrate dehydrogenase [NAD] subunit, mitochondrial OS=Macaca mulatta OX=9544 GN=IDH3G PE=3 SV=1;G7NSJ9_MACMU Isocitrate dehydrogenase [NAD] subunit, mitochondrial (Fragment) OS=Macaca mulatta OX=9544 GN=EGK_21085 PE=3 SV=1;F7E8B9_MACMU	6	8	8	8	30.3	41.525	707830000	908770000	512010000	561320000	588330000	821090000	984930000	830880000	993670000
H9EW42	Secernin-1 isoform a	SCRN1	H9EW42;A0A1D5QTA7;F7CYS6;A0A1D5R5D2;A0A1D5RBP9	H9EW42_MACMU Secernin-1 isoform a OS=Macaca mulatta OX=9544 GN=SCRN1 PE=2 SV=1;A0A1D5QTA7_MACMU Uncharacterized protein OS=Macaca mulatta OX=9544 GN=SCRN1 PE=4 SV=1;F7CYS6_MACMU Uncharacterized protein OS=Macaca mulatta OX=9544 GN=SCRN1 PE=4 SV=2;A0A1D5R5D	5	3	3	3	10.1	46.281	15210000	20922000	18628000	34068000	21047000	39402000	11414000	28054000	20120000
G7MUK9	NADH dehydrogenase [ubiquinone] iron-sulfur protein 6, mitochondrial	EGK_16330	G7MUK9;A0A1D5QTJ0;H9F430;H9H2Z9	G7MUK9_MACMU NADH dehydrogenase [ubiquinone] iron-sulfur protein 6, mitochondrial OS=Macaca mulatta OX=9544 GN=EGK_16330 PE=3 SV=1;A0A1D5QTJ0_MACMU NADH dehydrogenase [ubiquinone] iron-sulfur protein 6, mitochondrial OS=Macaca mulatta OX=9544 GN=NDUFS6 PE=	4	8	8	8	60.5	13.802	1844700000	2115600000	1260400000	1750400000	1260400000	1447000000	1658500000	2147500000	1777400000
A0A1D5QTL6	Uncharacterized protein	SGCG	A0A1D5QTL6;F7BP98	A0A1D5QTL6_MACMU Uncharacterized protein OS=Macaca mulatta OX=9544 GN=SGCG PE=4 SV=1;F7BP98_MACMU Gamma-sarcoglycan OS=Macaca mulatta OX=9544 GN=SGCG PE=4 SV=2	2	8	8	8	38.7	31.702	438420000	429650000	247620000	388420000	213220000	360170000	502520000	457730000	444160000
A0A1D5QTM2	Uncharacterized protein	HAGH	A0A1D5QTM2;I0FKW0;H9YXP2;H9FTN3;A0A1D5RKW9;G7NQT3;F6YDU0	A0A1D5QTM2_MACMU Uncharacterized protein OS=Macaca mulatta OX=9544 GN=HAGH PE=3 SV=1;I0FKW0_MACMU Hydroxyacylglutathione hydrolase, mitochondrial isoform 1 OS=Macaca mulatta OX=9544 GN=HAGH PE=2 SV=1;H9YXP2_MACMU Hydroxyacylglutathione hydrolase, mitochond	7	5	5	5	21.5	28.917	385840000	345610000	218020000	235850000	216780000	245170000	289880000	280770000	226000000
G7N505	Uncharacterized protein (Fragment)	EGK_02478	G7N505;G7N1M1;G7NRY9;F6TE46;A0A1D5QTR4;H9H5N0	G7N505_MACMU Uncharacterized protein (Fragment) OS=Macaca mulatta OX=9544 GN=EGK_02478 PE=4 SV=1;G7N1M1_MACMU Uncharacterized protein (Fragment) OS=Macaca mulatta OX=9544 GN=EGK_19468 PE=4 SV=1;G7NRY9_MACMU Uncharacterized protein OS=Macaca mulatta OX=9544	6	1	1	1	10.7	13.537				22594000	50253000
F6TRD3	Uncharacterized protein	SDHC	F6TRD3;F7CNE3;H9F7W5;I0FJD9;G7MZ60;F6TRE8;A0A1D5QTZ3	F6TRD3_MACMU Uncharacterized protein OS=Macaca mulatta OX=9544 GN=SDHC PE=4 SV=1;F7CNE3_MACMU Uncharacterized protein OS=Macaca mulatta OX=9544 GN=SDHC PE=4 SV=1;H9F7W5_MACMU Succinate dehydrogenase cytochrome b560 subunit, mitochondrial isoform 1 (Fragmen	7	2	2	2	18.1	12.474	318320000	323350000	278730000	358130000	294330000	302710000	308490000	243950000	378440000
H9Z186	Proteasome activator complex subunit 2	PSME2	H9Z186;F7FF43;G7MX62;A0A1D5QTZ7	H9Z186_MACMU Proteasome activator complex subunit 2 OS=Macaca mulatta OX=9544 GN=PSME2 PE=2 SV=1;F7FF43_MACMU Proteasome activator complex subunit 2 OS=Macaca mulatta OX=9544 GN=PSME2 PE=2 SV=1;G7MX62_MACMU Uncharacterized protein OS=Macaca mulatta OX=9544	4	3	3	3	15.9	27.391	25910000	36046000	29293000	24643000	29375000	26306000	59930000	19870000	21738000
A0A1D5QU02	Uncharacterized protein	TRIM72	A0A1D5QU02;F7GAH4	A0A1D5QU02_MACMU Uncharacterized protein OS=Macaca mulatta OX=9544 GN=TRIM72 PE=4 SV=1;F7GAH4_MACMU Uncharacterized protein OS=Macaca mulatta OX=9544 GN=TRIM72 PE=4 SV=2	2	17	17	17	48	52.637	1173500000	1782400000	1266100000	1136000000	1782200000	1579800000	1549300000	1982600000	1783200000
A0A1D5QU10	FAS-associated factor 2	FAF2	A0A1D5QU10	A0A1D5QU10_MACMU FAS-associated factor 2 OS=Macaca mulatta OX=9544 GN=FAF2 PE=2 SV=1	1	1	1	1	2	52.651
F7DQR7	Uncharacterized protein	SEPT7	F7DQR7;F7DQT7;I0FWU9;A0A1D5QU34;H9YUE5;F7EK21;A0A1D5QTE6;A0A1D5QKS6;F7GZL4;Q4G406;F7EK32;F7H0P1;A0A1D5QY21;A0A1D5R4K3;A0A1D5QLL1	F7DQR7_MACMU Uncharacterized protein OS=Macaca mulatta OX=9544 GN=SEPT7 PE=3 SV=2;F7DQT7_MACMU Uncharacterized protein OS=Macaca mulatta OX=9544 GN=SEPT7 PE=3 SV=2;I0FWU9_MACMU Septin-7 isoform 1 OS=Macaca mulatta OX=9544 GN=SEPT7 PE=2 SV=1;A0A1D5QU34_MACM	15	9	9	9	22.4	48.584	189950000	168990000	255020000	221030000	227740000	151170000	176740000	176540000	177970000
A0A1D5RH95	MICOS complex subunit MIC10	MICOS10	A0A1D5RH95;F6TSY6;A0A1D5QU61	A0A1D5RH95_MACMU MICOS complex subunit MIC10 OS=Macaca mulatta OX=9544 GN=MICOS10 PE=3 SV=1;F6TSY6_MACMU MICOS complex subunit MIC10 OS=Macaca mulatta OX=9544 GN=MICOS10 PE=3 SV=1;A0A1D5QU61_MACMU MICOS complex subunit MIC10 OS=Macaca mulatta OX=9544 GN=MI	3	2	1	2	20	8.5578	147300000	172180000	107720000	112850000	121070000	173330000	138650000	141650000	139340000
A0A1D5QU62	Uncharacterized protein	CIAPIN1	A0A1D5QU62;F6VRH8;H9FXF1;G7NPU5	A0A1D5QU62_MACMU Uncharacterized protein OS=Macaca mulatta OX=9544 GN=CIAPIN1 PE=4 SV=1;F6VRH8_MACMU Fe-S cluster assembly protein DRE2 OS=Macaca mulatta OX=9544 GN=CIAPIN1 PE=3 SV=2;H9FXF1_MACMU Anamorsin OS=Macaca mulatta OX=9544 GN=CIAPIN1 PE=2 SV=1;G7N	4	1	1	1	6.3	20.485
A0A1D5QU63	Uncharacterized protein	ASNS	A0A1D5QU63;I0FJY0;H9EVX5;G7MLT7;F6SSI3;A0A1D5R6Q4	A0A1D5QU63_MACMU Uncharacterized protein OS=Macaca mulatta OX=9544 GN=ASNS PE=4 SV=1;I0FJY0_MACMU Asparagine synthetase [glutamine-hydrolyzing] isoform a OS=Macaca mulatta OX=9544 GN=ASNS PE=2 SV=1;H9EVX5_MACMU Asparagine synthetase [glutamine-hydrolyzing]	6	2	2	2	5.5	45.706					52671000
A0A1D5RGE6	Uncharacterized protein		A0A1D5RGE6;A0A1D5RKR7;A0A1D5QU76;H9EN79;G7MSX5	A0A1D5RGE6_MACMU Uncharacterized protein OS=Macaca mulatta OX=9544 PE=4 SV=1;A0A1D5RKR7_MACMU Uncharacterized protein OS=Macaca mulatta OX=9544 PE=4 SV=1;A0A1D5QU76_MACMU Enolase-phosphatase E1 OS=Macaca mulatta OX=9544 GN=ENOPH1 PE=3 SV=1;H9EN79_MACMU Eno	5	1	1	1	8.1	16.525	12344000	10082000	8484900	15157000	12762000
A0A1D5R4M4	LanC-like protein 1	LANCL1	A0A1D5R4M4;A0A1D5QU99;A0A1D5QP26	A0A1D5R4M4_MACMU LanC-like protein 1 OS=Macaca mulatta OX=9544 GN=LANCL1 PE=2 SV=1;A0A1D5QU99_MACMU Uncharacterized protein OS=Macaca mulatta OX=9544 GN=LANCL1 PE=4 SV=1;A0A1D5QP26_MACMU Uncharacterized protein OS=Macaca mulatta OX=9544 GN=LANCL1 PE=4 SV=1	3	4	4	4	11	45.267	225300000	314860000	137070000	189440000	169200000	184650000	185460000	162800000	215290000
F7GZY5	Uncharacterized protein	QARS	F7GZY5;A0A1D5QUA8;A0A1D5Q353;A0A1D5QZV5;A0A1D5Q8W9	F7GZY5_MACMU Uncharacterized protein OS=Macaca mulatta OX=9544 GN=QARS PE=3 SV=2;A0A1D5QUA8_MACMU Glutaminyl-tRNA synthetase OS=Macaca mulatta OX=9544 GN=QARS PE=2 SV=1;A0A1D5Q353_MACMU Uncharacterized protein OS=Macaca mulatta OX=9544 GN=QARS PE=3 SV=1;A0	5	6	6	6	10.4	85.056	20954000	22697000	48218000	30762000	78468000	20162000
A0A1D5QUD4	Perilipin	PLIN3	A0A1D5QUD4;H9FNJ8;G7NMI2;F6YNG4	A0A1D5QUD4_MACMU Perilipin OS=Macaca mulatta OX=9544 GN=PLIN3 PE=3 SV=1;H9FNJ8_MACMU Perilipin OS=Macaca mulatta OX=9544 GN=PLIN3 PE=2 SV=1;G7NMI2_MACMU Perilipin OS=Macaca mulatta OX=9544 GN=PLIN3 PE=2 SV=1;F6YNG4_MACMU Perilipin OS=Macaca mulatta OX=9544	4	8	8	8	34.5	43.926	155040000	203950000	168500000	169040000	145130000	183050000	119650000	158490000	128390000
A0A1D5QUI5	Uncharacterized protein		A0A1D5QUI5;F7CQ88;A0A1D5QT00;H9YX67;H9FQW1;G7MX92;H9YX66;H9FQV9;A0A1D5QDC5;A0A1D5RHB7;A0A1D5RKP8;A0A1D5Q903;A0A1D5QU67	A0A1D5QUI5_MACMU Uncharacterized protein OS=Macaca mulatta OX=9544 PE=4 SV=1;F7CQ88_MACMU Uncharacterized protein OS=Macaca mulatta OX=9544 GN=DUT PE=4 SV=2;A0A1D5QT00_MACMU Uncharacterized protein OS=Macaca mulatta OX=9544 GN=DUT PE=4 SV=1;H9YX67_MACMU De	13	4	3	4	31.1	17.83		29685000	71529000		73092000		43604000
F7FHY9	Uncharacterized protein	EWSR1	F7FHY9;A0A1D5QUJ1;F7FHZ8;F7FHZ4;A0A1D5RGB7;F7FI06;H9ENA6;G7N3I9;H9ENA5	F7FHY9_MACMU Uncharacterized protein OS=Macaca mulatta OX=9544 GN=EWSR1 PE=4 SV=2;A0A1D5QUJ1_MACMU Uncharacterized protein OS=Macaca mulatta OX=9544 GN=EWSR1 PE=4 SV=1;F7FHZ8_MACMU Uncharacterized protein OS=Macaca mulatta OX=9544 GN=EWSR1 PE=4 SV=1;F7FHZ4	9	2	2	2	3.9	61.459	18480000	36392000	46661000	8763200	78231000	48800000			28011000
A0A1D5QUL2	Serine/threonine-protein phosphatase	PPP1CA	A0A1D5QUL2;F7GWK7;F7CR20;F7GWK6	A0A1D5QUL2_MACMU Serine/threonine-protein phosphatase OS=Macaca mulatta OX=9544 GN=PPP1CA PE=3 SV=1;F7GWK7_MACMU Serine/threonine-protein phosphatase OS=Macaca mulatta OX=9544 GN=PPP1CA PE=2 SV=1;F7CR20_MACMU Serine/threonine-protein phosphatase OS=Macaca	4	6	1	1	23.3	28.898			90224000	156980000	135600000	129280000
A0A1D5QUL8	Uncharacterized protein	SLC35B2	A0A1D5QUL8;A0A1D5R3J2;G7MPG3;I2CUE3;H9ENN0	A0A1D5QUL8_MACMU Uncharacterized protein OS=Macaca mulatta OX=9544 GN=SLC35B2 PE=4 SV=1;A0A1D5R3J2_MACMU Uncharacterized protein OS=Macaca mulatta OX=9544 GN=SLC35B2 PE=4 SV=1;G7MPG3_MACMU Uncharacterized protein (Fragment) OS=Macaca mulatta OX=9544 GN=EGK	5	1	1	1	4	32.653	19214000	22703000		23000000	21122000
A0A1D5QUS2	Phosphate transporter	SLC20A2	A0A1D5QUS2;A0A1D5RFC4	A0A1D5QUS2_MACMU Phosphate transporter OS=Macaca mulatta OX=9544 GN=SLC20A2 PE=3 SV=1;A0A1D5RFC4_MACMU Phosphate transporter OS=Macaca mulatta OX=9544 GN=SLC20A2 PE=2 SV=1	2	1	1	1	1.6	61.223	589670000	47230000	407920000	352470000				525560000	1280400000
G7MIL4	Sodium/potassium-transporting ATPase subunit alpha (Fragment)	EGK_01137	G7MIL4;F7HE86;A0A1D5R4I3;F6WKJ2;A0A1D5QUS6;A0A1D5Q1B7;F7HE84;G7NM56;F6TGE9;A0A1D5R8X7;H9FL63	G7MIL4_MACMU Sodium/potassium-transporting ATPase subunit alpha (Fragment) OS=Macaca mulatta OX=9544 GN=EGK_01137 PE=3 SV=1;F7HE86_MACMU Sodium/potassium-transporting ATPase subunit alpha OS=Macaca mulatta OX=9544 GN=ATP1A1 PE=2 SV=1;A0A1D5R4I3_MACMU Sodiu	11	30	16	30	38	112.54	4427000000	4284000000	3123700000	4025700000	3139700000	3741700000	5231300000	3911900000	4164100000
A0A1D5QUU3	Uncharacterized protein	TAF6	A0A1D5QUU3;G7MNT3;F6YGY4;A0A1D5REN8	A0A1D5QUU3_MACMU Uncharacterized protein OS=Macaca mulatta OX=9544 GN=TAF6 PE=4 SV=1;G7MNT3_MACMU Uncharacterized protein OS=Macaca mulatta OX=9544 GN=TAF6 PE=4 SV=1;F6YGY4_MACMU Uncharacterized protein OS=Macaca mulatta OX=9544 GN=TAF6 PE=4 SV=2;A0A1D5REN	4	1	1	1	10.3	17.681								1142100000	182180000
A0A1D5QUU6	Uncharacterized protein	GPX3	A0A1D5QUU6;G7MRB6;F6Q074	A0A1D5QUU6_MACMU Uncharacterized protein OS=Macaca mulatta OX=9544 GN=GPX3 PE=4 SV=1;G7MRB6_MACMU Glutathione peroxidase OS=Macaca mulatta OX=9544 GN=EGK_14626 PE=3 SV=1;F6Q074_MACMU Glutathione peroxidase OS=Macaca mulatta OX=9544 GN=GPX5 PE=3 SV=2	3	6	6	6	26.9	24.442	420560000	528610000	401390000	241020000	173040000	153470000	444230000	376700000	360520000
G7MUB7	Heat shock 70 kDa protein 4	HSPA4	G7MUB7;A0A1D5QUV8;F6XAP8;A0A1D5RDZ7;A0A1D5QYW2;F6XAM9;A0A1D5R9H4	G7MUB7_MACMU Heat shock 70 kDa protein 4 OS=Macaca mulatta OX=9544 GN=HSPA4 PE=2 SV=1;A0A1D5QUV8_MACMU Uncharacterized protein OS=Macaca mulatta OX=9544 GN=HSPA4 PE=3 SV=1;F6XAP8_MACMU Uncharacterized protein OS=Macaca mulatta OX=9544 GN=HSPA4 PE=3 SV=2	7	27	26	27	39.6	94.352	624050000	629970000	1027500000	1058800000	1268000000	787200000	796440000	520920000	590660000
F6YKK9	Beta-sarcoglycan (Fragment)	EGK_15894	F6YKK9;A0A1D5QUX5	F6YKK9_MACMU Beta-sarcoglycan (Fragment) OS=Macaca mulatta OX=9544 GN=EGK_15894 PE=4 SV=1;A0A1D5QUX5_MACMU Uncharacterized protein OS=Macaca mulatta OX=9544 GN=SGCB PE=4 SV=1	2	7	7	7	30.6	33.796	404560000	370440000	245780000	340210000	220120000	406080000	502060000	389030000	452180000
I0FPB1	Coiled-coil domain-containing protein 127	CCDC127	I0FPB1;H9FQ10;G7MU49;A0A1D5QUY2	I0FPB1_MACMU Coiled-coil domain-containing protein 127 OS=Macaca mulatta OX=9544 GN=CCDC127 PE=2 SV=1;H9FQ10_MACMU Coiled-coil domain-containing protein 127 OS=Macaca mulatta OX=9544 GN=CCDC127 PE=2 SV=1;G7MU49_MACMU Coiled-coil domain-containing protein 1	4	1	1	1	4.2	30.817
A0A1D5R7E7	Mitogen-activated protein kinase	MAPK1	A0A1D5R7E7;F7ECR3;H9FBJ3;A0A1D5QUZ8;I2CVQ1;A0A1D5QZ91;A0A1D5Q2T1;F7EZ96;H9F7V0;G7NQJ9;F7EZA7;A0A1D5Q5Z6;H9F856	A0A1D5R7E7_MACMU Mitogen-activated protein kinase OS=Macaca mulatta OX=9544 GN=MAPK1 PE=3 SV=1;F7ECR3_MACMU Mitogen-activated protein kinase OS=Macaca mulatta OX=9544 GN=MAPK1 PE=3 SV=2;H9FBJ3_MACMU Mitogen-activated protein kinase (Fragment) OS=Macaca mul	13	2	2	2	7.6	36.432	25360000		45433000		26277000	41812000	29222000
A0A1D5R0J8	Uncharacterized protein	GK	A0A1D5R0J8;G7MS97;A0A1D5QW52;H9FSZ3;F6UUN2;A0A1D5QV07;A0A1D5R1R2;A0A1D5QRF6;A0A1D5RKW4;F7HBG8	A0A1D5R0J8_MACMU Uncharacterized protein OS=Macaca mulatta OX=9544 GN=GK PE=3 SV=1;G7MS97_MACMU Uncharacterized protein OS=Macaca mulatta OX=9544 GN=EGK_16218 PE=3 SV=1;A0A1D5QW52_MACMU Uncharacterized protein OS=Macaca mulatta OX=9544 GN=GK PE=3 SV=1;H9FS	10	7	7	7	14.5	58.154	147120000	125110000	86798000	123750000	112240000	201110000	91943000	98746000	199720000
H9EQA5	Calpain-2 catalytic subunit isoform 1	CAPN2	H9EQA5;A0A1D5QV13;A0A1D5QG11;G7MEH1	H9EQA5_MACMU Calpain-2 catalytic subunit isoform 1 OS=Macaca mulatta OX=9544 GN=CAPN2 PE=2 SV=1;A0A1D5QV13_MACMU Uncharacterized protein OS=Macaca mulatta OX=9544 GN=CAPN2 PE=3 SV=1;A0A1D5QG11_MACMU Uncharacterized protein OS=Macaca mulatta OX=9544 GN=CAPN	4	11	11	11	15.6	80.025	192180000	166280000	244460000	206470000	249030000	189630000	128790000	89398000	174180000
F7FN25	Uncharacterized protein	PUF60	F7FN25;F7AB04;F7FN20;A0A1D5QV23;G7N098;A0A1D5Q637;A0A1D5QFJ8	F7FN25_MACMU Uncharacterized protein OS=Macaca mulatta OX=9544 GN=PUF60 PE=4 SV=2;F7AB04_MACMU Uncharacterized protein OS=Macaca mulatta OX=9544 GN=PUF60 PE=4 SV=2;F7FN20_MACMU Poly(U)-binding-splicing factor PUF60 isoform b OS=Macaca mulatta OX=9544 GN=PU	7	2	2	2	8.9	57.103			68611000	67549000	78710000	61693000
A0A1D5QV29	Uncharacterized protein	EIF4B	A0A1D5QV29;H9Z639;H9FQY2;F6QN28;I0FPS4;H9Z638;A0A1D5QDR3;A0A1D5RDJ6;A0A1D5QSR4;A0A1D5Q089;A0A1D5RJZ1;A0A1D5Q3U3;F7GYU8;A0A1D5RGW9;A0A1D5R0U0;F6VRA3;A0A1D5RCI6	A0A1D5QV29_MACMU Uncharacterized protein OS=Macaca mulatta OX=9544 GN=EIF4B PE=4 SV=1;H9Z639_MACMU Eukaryotic translation initiation factor 4B OS=Macaca mulatta OX=9544 GN=EIF4B PE=2 SV=1;H9FQY2_MACMU Eukaryotic translation initiation factor 4B OS=Macaca m	17	8	8	8	17.8	66.228	82833000	92739000	152510000	171100000	178720000	112610000	85952000	86470000	103830000
A0A1D5QV35	Uncharacterized protein	MRPS22	A0A1D5QV35;H9EXG0;G7MJN1	A0A1D5QV35_MACMU Uncharacterized protein OS=Macaca mulatta OX=9544 GN=MRPS22 PE=4 SV=1;H9EXG0_MACMU 28S ribosomal protein S22, mitochondrial OS=Macaca mulatta OX=9544 GN=MRPS22 PE=2 SV=1;G7MJN1_MACMU Uncharacterized protein OS=Macaca mulatta OX=9544 GN=EGK	3	4	4	4	15	36.832	96329000	66573000	57209000	99579000	95643000	93385000	97662000	118850000	100770000
A0A1D5QV48	Small nuclear ribonucleoprotein E		A0A1D5QV48;F7GRR5	A0A1D5QV48_MACMU Small nuclear ribonucleoprotein E OS=Macaca mulatta OX=9544 PE=3 SV=1;F7GRR5_MACMU Small nuclear ribonucleoprotein E OS=Macaca mulatta OX=9544 GN=SNRPE PE=2 SV=1	2	1	1	1	12.9	10.044		38081000	145900000	55013000	172500000	83806000	32028000	18535000	31397000
A0A1D5QV59	Uncharacterized protein	DNAJA3	A0A1D5QV59;H9F4Y9;G7NPI8;H9F4T2;A0A1D5QB63;F7HGP5;A0A1D5RB83	A0A1D5QV59_MACMU Uncharacterized protein OS=Macaca mulatta OX=9544 GN=DNAJA3 PE=4 SV=1;H9F4Y9_MACMU DnaJ homolog subfamily A member 3, mitochondrial isoform 1 (Fragment) OS=Macaca mulatta OX=9544 GN=DNAJA3 PE=2 SV=1;G7NPI8_MACMU Tumorous imaginal discs pro	7	6	6	6	19.7	50.316	113350000	93403000	91641000	117530000	82880000	90291000	119600000	96904000	95303000
A0A1D5QV70	Uncharacterized protein	ALDH3A2	A0A1D5QV70;H9FRC7;F7C1B5;G7NGG6;F7C1D1;A0A1D5QYN9;A0A1D5QW73	A0A1D5QV70_MACMU Uncharacterized protein OS=Macaca mulatta OX=9544 GN=ALDH3A2 PE=3 SV=1;H9FRC7_MACMU Aldehyde dehydrogenase OS=Macaca mulatta OX=9544 GN=ALDH3A2 PE=2 SV=1;F7C1B5_MACMU Aldehyde dehydrogenase OS=Macaca mulatta OX=9544 GN=ALDH3A2 PE=3 SV=2;G7	7	6	6	6	21.6	44.486	304620000	269360000	168980000	258930000	275310000	300050000	232300000	247980000	224400000
A0A1D5QV74	Uncharacterized protein	MRPS11	A0A1D5QV74;F7GG48;G7MYR4	A0A1D5QV74_MACMU Uncharacterized protein OS=Macaca mulatta OX=9544 GN=MRPS11 PE=3 SV=1;F7GG48_MACMU 28S ribosomal protein S11, mitochondrial isoform a OS=Macaca mulatta OX=9544 GN=MRPS11 PE=2 SV=1;G7MYR4_MACMU 28S ribosomal protein S11, mitochondrial OS=Ma	3	1	1	1	9.9	17.097		15799000			12158000	34087000	18145000	21818000	49711000
A0A1D5QVD5	Uncharacterized protein	COX20	A0A1D5QVD5;F6R113;G7MFK4	A0A1D5QVD5_MACMU Uncharacterized protein OS=Macaca mulatta OX=9544 GN=COX20 PE=2 SV=1;F6R113_MACMU Uncharacterized protein OS=Macaca mulatta OX=9544 GN=COX20 PE=4 SV=2;G7MFK4_MACMU Uncharacterized protein (Fragment) OS=Macaca mulatta OX=9544 GN=EGK_02064 P	3	3	3	3	19.5	13.343	176520000	192110000	127170000	165630000	148700000	211210000	147010000	159460000	149880000
A0A1D5QVF5	Uncharacterized protein	MYH7	A0A1D5QVF5;F7G0R4;A0A1D5QFZ1;H9FB38;G7NCK2;F7HTM5;F7C834;F7DNQ6	A0A1D5QVF5_MACMU Uncharacterized protein OS=Macaca mulatta OX=9544 GN=MYH7 PE=3 SV=1;F7G0R4_MACMU Uncharacterized protein OS=Macaca mulatta OX=9544 GN=MYH7 PE=3 SV=2;A0A1D5QFZ1_MACMU Uncharacterized protein OS=Macaca mulatta OX=9544 GN=MYH7 PE=3 SV=1	8	210	7	210	72.1	222.93	1248600000000	1250800000000	864710000000	1111100000000	1005700000000	1296000000000	1257700000000	1475200000000	1389700000000
A0A1D5QVI4	Uncharacterized protein	TMED5	A0A1D5QVI4;F7GYA0	A0A1D5QVI4_MACMU Uncharacterized protein OS=Macaca mulatta OX=9544 GN=TMED5 PE=3 SV=1;F7GYA0_MACMU Transmembrane emp24 domain-containing protein 5 isoform 1 OS=Macaca mulatta OX=9544 GN=TMED5 PE=2 SV=2	2	1	1	1	7	19.927
A0A1D5RDR6	Uncharacterized protein	TCOF1	A0A1D5RDR6;F7E9S9;Q2FBJ5;A0A1D5QVN6;G7MVM4;A0A1D5RKQ9;A0A1D5R7L3	A0A1D5RDR6_MACMU Uncharacterized protein OS=Macaca mulatta OX=9544 GN=TCOF1 PE=4 SV=1;F7E9S9_MACMU Uncharacterized protein OS=Macaca mulatta OX=9544 GN=TCOF1 PE=4 SV=2;Q2FBJ5_MACMU Treacle (Fragment) OS=Macaca mulatta OX=9544 GN=TCOF1 PE=2 SV=1;A0A1D5QVN6_	7	1	1	1	5.9	20.934
A0A1D5QVR2	Uncharacterized protein	ALYREF	A0A1D5QVR2	A0A1D5QVR2_MACMU Uncharacterized protein OS=Macaca mulatta OX=9544 GN=ALYREF PE=4 SV=1	1	4	1	1	26.5	19.841					59774000
A0A1D5QVT3	Succinate dehydrogenase [ubiquinone] cytochrome b small subunit	SDHD	A0A1D5QVT3;I0FU44;G7NC18;F6ZHN0;F6VUJ9;A0A1D5RCP1;A0A1D5QNI5	A0A1D5QVT3_MACMU Succinate dehydrogenase [ubiquinone] cytochrome b small subunit OS=Macaca mulatta OX=9544 GN=SDHD PE=3 SV=1;I0FU44_MACMU Succinate dehydrogenase [ubiquinone] cytochrome b small subunit OS=Macaca mulatta OX=9544 GN=SDHD PE=2 SV=1;G7NC18_MAC	7	2	2	2	14.2	12.638	391880000	451040000	259530000	241780000	225040000	383480000	262150000	401020000	362740000
I0FJS6	Cathepsin B preproprotein	CTSB	I0FJS6;G7N0H2;A0A1D5QVT4;H9EZ52;F6QQ66	I0FJS6_MACMU Cathepsin B preproprotein OS=Macaca mulatta OX=9544 GN=CTSB PE=2 SV=1;G7N0H2_MACMU Cathepsin B OS=Macaca mulatta OX=9544 GN=EGK_18679 PE=3 SV=1;A0A1D5QVT4_MACMU Uncharacterized protein OS=Macaca mulatta OX=9544 GN=CTSB PE=3 SV=1;H9EZ52_MACMU C	5	9	9	9	30.7	37.776	697700000	640410000	471760000	627710000	545090000	883680000	1032200000	989990000	750230000
A0A1D5QVZ6	Uncharacterized protein	MXRA7	A0A1D5QVZ6;A0A1D5Q7L4;A0A1D5REJ0;G7NGY6	A0A1D5QVZ6_MACMU Uncharacterized protein OS=Macaca mulatta OX=9544 GN=MXRA7 PE=4 SV=1;A0A1D5Q7L4_MACMU Uncharacterized protein OS=Macaca mulatta OX=9544 GN=MXRA7 PE=4 SV=1;A0A1D5REJ0_MACMU Uncharacterized protein OS=Macaca mulatta OX=9544 GN=MXRA7 PE=4 SV=	4	5	1	5	37.6	17.503	207380000	175530000	133070000	192410000	143010000	305380000	148200000	161200000	208720000
F7G108	RAB5L	RAB5C	F7G108;A0A1D5QW07;A0A1D5Q4R4;A0A1D5Q6J9	F7G108_MACMU RAB5L OS=Macaca mulatta OX=9544 GN=RAB5C PE=2 SV=1;A0A1D5QW07_MACMU Uncharacterized protein OS=Macaca mulatta OX=9544 GN=RAB5C PE=4 SV=1;A0A1D5Q4R4_MACMU Uncharacterized protein OS=Macaca mulatta OX=9544 GN=RAB5C PE=4 SV=1;A0A1D5Q6J9_MACMU Unc	4	7	4	7	38.9	23.482	217810000	298830000	387140000	336710000	415860000	247650000	360000000	252870000	292880000
F7GPE6	Uncharacterized protein	HNRNPA3	F7GPE6;F7GPE1;I2CTX9;A0A1D5QW22;H9Z6C4;F7AIF6;G7N8E0;F7BSA9;F7GPE2;A0A1D5Q4W9;A0A1D5QUR9;A0A1D5R898;A0A1D5QFU3	F7GPE6_MACMU Uncharacterized protein OS=Macaca mulatta OX=9544 GN=HNRNPA3 PE=4 SV=2;F7GPE1_MACMU Uncharacterized protein OS=Macaca mulatta OX=9544 GN=HNRNPA3 PE=4 SV=2;I2CTX9_MACMU Heterogeneous nuclear ribonucleoprotein A3 OS=Macaca mulatta OX=9544 GN=HNR	13	7	7	7	29.2	34.353	238720000	319410000	512030000	477200000	696910000	395610000	313010000	250440000	281340000
A0A1D5RJE4	Uncharacterized protein	PAK1	A0A1D5RJE4;G7NEE3;A0A1D5RFG1;A0A1D5QW25;F7GWI2;H9EM79;F7D0C3;F7D0B4;F6XUP1;H9F9H4;A0A1D5Q7U4;H9EPY7;I2CTD5;A0A1D5R5I6;F6XUQ0	A0A1D5RJE4_MACMU Uncharacterized protein OS=Macaca mulatta OX=9544 GN=PAK1 PE=3 SV=1;G7NEE3_MACMU Non-specific serine/threonine protein kinase OS=Macaca mulatta OX=9544 GN=EGK_06707 PE=4 SV=1;A0A1D5RFG1_MACMU Non-specific serine/threonine protein kinase OS	15	2	2	2	11.6	33.954					20909000
F7DF35	Uncharacterized protein	DPYSL2	F7DF35;I0FPP6;A0A1D5QW32;G7N0R4	F7DF35_MACMU Uncharacterized protein OS=Macaca mulatta OX=9544 GN=DPYSL2 PE=4 SV=2;I0FPP6_MACMU Dihydropyrimidinase-related protein 2 isoform 2 OS=Macaca mulatta OX=9544 GN=DPYSL2 PE=2 SV=1;A0A1D5QW32_MACMU Uncharacterized protein OS=Macaca mulatta OX=9544	4	19	15	19	53.1	61.76	1472500000	1317000000	1340800000	1042200000	997300000	1180600000	1341700000	1245300000	1079200000
G7MKJ6	Uncharacterized protein (Fragment)	EGK_11355	G7MKJ6;A0A1D5QW58;H9FSV2;F7G5M1	G7MKJ6_MACMU Uncharacterized protein (Fragment) OS=Macaca mulatta OX=9544 GN=EGK_11355 PE=4 SV=1;A0A1D5QW58_MACMU Uncharacterized protein OS=Macaca mulatta OX=9544 GN=FAM162A PE=4 SV=1;H9FSV2_MACMU Growth and transformation-dependent protein OS=Macaca mula	4	7	7	7	38.9	16.494	855110000	1086400000	568230000	1034600000	982900000	1053000000	399400000	676570000	1079000000
I0FVU1	Liprin-beta-1 isoform 1	PPFIBP1	I0FVU1;I0FVU0;H9G0Z5;F7DXX3;I2CTC6;H9G0Z7;H9G0Z6;F7DXZ6;A0A1D5QWA2;F7DXW6;A0A1D5R6R3;A0A1D5RGL8	I0FVU1_MACMU Liprin-beta-1 isoform 1 OS=Macaca mulatta OX=9544 GN=PPFIBP1 PE=2 SV=1;I0FVU0_MACMU Liprin-beta-1 isoform 1 OS=Macaca mulatta OX=9544 GN=PPFIBP1 PE=2 SV=1;H9G0Z5_MACMU Liprin-beta-1 isoform 1 OS=Macaca mulatta OX=9544 GN=PPFIBP1 PE=2 SV=1;F7DX	12	4	4	4	4.5	111.53		38343000			26487000		36787000
F6UZ60	Fibrinogen alpha chain	FGA	F6UZ60;A0A1D5QWA9;Q28495	F6UZ60_MACMU Fibrinogen alpha chain OS=Macaca mulatta OX=9544 GN=FGA PE=4 SV=2;A0A1D5QWA9_MACMU Fibrinogen alpha chain OS=Macaca mulatta OX=9544 GN=FGA PE=4 SV=1;Q28495_MACMU Fibrinogen A-alpha-chain (Fragment) OS=Macaca mulatta OX=9544 PE=4 SV=1	3	16	1	1	25.9	95.912		4754100	56285000			43651000
G7MH12	Uncharacterized protein	EGK_00773	G7MH12;A0A1D5QWD2;F7C7P9;H9F2V2;F7C7Q5	G7MH12_MACMU Uncharacterized protein OS=Macaca mulatta OX=9544 GN=EGK_00773 PE=3 SV=1;A0A1D5QWD2_MACMU Uncharacterized protein OS=Macaca mulatta OX=9544 GN=ECHDC2 PE=3 SV=1;F7C7P9_MACMU Uncharacterized protein OS=Macaca mulatta OX=9544 GN=ECHDC2 PE=4 SV=2;	5	4	4	4	18.8	31.19	297030000	171260000	89769000	300280000	109010000	182690000	226380000	216300000	217150000
H9F8U4	5-AMP-activated protein kinase subunit beta-2 (Fragment)	PRKAB2	H9F8U4;A0A1D5QYZ8;A0A1D5QWE9	H9F8U4_MACMU 5-AMP-activated protein kinase subunit beta-2 (Fragment) OS=Macaca mulatta OX=9544 GN=PRKAB2 PE=2 SV=1;A0A1D5QYZ8_MACMU Uncharacterized protein OS=Macaca mulatta OX=9544 GN=PRKAB2 PE=4 SV=1;A0A1D5QWE9_MACMU 5-AMP-activated protein kinase sub	3	1	1	1	6.8	29.623								30243000
G7MQF7	Histidine triad nucleotide-binding protein 3	HINT3	G7MQF7;F6ZLK6;A0A1D5QWF7	G7MQF7_MACMU Histidine triad nucleotide-binding protein 3 OS=Macaca mulatta OX=9544 GN=HINT3 PE=2 SV=1;F6ZLK6_MACMU Uncharacterized protein OS=Macaca mulatta OX=9544 GN=HINT3 PE=4 SV=1;A0A1D5QWF7_MACMU Uncharacterized protein OS=Macaca mulatta OX=9544 GN=H	3	1	1	1	11	20.408					12562000	29701000		10791000	16361000
F7HJH6	Conserved oligomeric Golgi complex subunit 3	COG3	F7HJH6;A0A1D5QWG2	F7HJH6_MACMU Conserved oligomeric Golgi complex subunit 3 OS=Macaca mulatta OX=9544 GN=COG3 PE=4 SV=1;A0A1D5QWG2_MACMU Uncharacterized protein OS=Macaca mulatta OX=9544 GN=COG3 PE=4 SV=1	2	1	1	1	1.8	94.074	3218100	6836600	6812800				5783100
A0A1D5QYR1	Uncharacterized protein	RRAGC	A0A1D5QYR1;G7MFY5;H9FBU6;G7MPX2;A0A1D5QWI3;F7H1S0;F7DZE8;H9EUI6	A0A1D5QYR1_MACMU Uncharacterized protein OS=Macaca mulatta OX=9544 GN=RRAGC PE=4 SV=1;G7MFY5_MACMU Uncharacterized protein (Fragment) OS=Macaca mulatta OX=9544 GN=EGK_00589 PE=4 SV=1;H9FBU6_MACMU Ras-related GTP-binding protein C (Fragment) OS=Macaca mulat	8	3	3	3	10.9	36.604	15182000	15231000	15188000	15573000	15787000	11543000	17455000	17286000
H9FN78	Caveolin	CAV2	H9FN78;A0A1D5QWL9;F7C1W2;G7MM59	H9FN78_MACMU Caveolin OS=Macaca mulatta OX=9544 GN=CAV2 PE=2 SV=1;A0A1D5QWL9_MACMU Caveolin OS=Macaca mulatta OX=9544 GN=CAV2 PE=3 SV=1	4	3	3	3	25.9	18.251	399700000	682150000	327880000	308490000	253040000	261250000	825760000	617400000	331600000
F7HGE8	Uncharacterized protein	HNRNPUL1	F7HGE8;A0A1D5R9L7;G7NLI8;A0A1D5QWM5;H9EMU1;A0A1D5R2A2	F7HGE8_MACMU Uncharacterized protein OS=Macaca mulatta OX=9544 GN=HNRNPUL1 PE=4 SV=2;A0A1D5R9L7_MACMU Uncharacterized protein OS=Macaca mulatta OX=9544 GN=HNRNPUL1 PE=4 SV=1;G7NLI8_MACMU Uncharacterized protein OS=Macaca mulatta OX=9544 GN=EGK_10647 PE=4 S	6	2	2	2	4.1	84.513		10756000	25755000	12899000	14714000
A0A1D5QWN7	40S ribosomal protein S9	RPS9	A0A1D5QWN7;F7H3C4;F6Y9H7	A0A1D5QWN7_MACMU 40S ribosomal protein S9 OS=Macaca mulatta OX=9544 GN=RPS9 PE=2 SV=1	3	9	9	9	39.2	22.591	517340000	723290000	1204300000	1153900000	1444700000	837540000	795440000	459890000	514920000
A0A1Z2TI02	Immunglobulin light chain variable region (Fragment)		A0A1Z2TI02;A0A1Z2TI00;G8F153;G8F152;F7H5Y4;A0A1D5QWP0	A0A1Z2TI02_MACMU Immunglobulin light chain variable region (Fragment) OS=Macaca mulatta OX=9544 PE=2 SV=1;A0A1Z2TI00_MACMU Immunglobulin light chain variable region (Fragment) OS=Macaca mulatta OX=9544 PE=2 SV=1;G8F153_MACMU Uncharacterized protein (Fragme	6	1	1	1	11.6	12.188	52595000	29896000	78550000	59739000	16170000	32373000	67409000	38210000
H9EUU5	Protein-cysteine N-palmitoyltransferase HHAT-like protein	HHATL	H9EUU5;G7MIX8;A0A1D5QWP5;F7HRJ3	H9EUU5_MACMU Protein-cysteine N-palmitoyltransferase HHAT-like protein OS=Macaca mulatta OX=9544 GN=HHATL PE=2 SV=1;G7MIX8_MACMU Uncharacterized protein OS=Macaca mulatta OX=9544 GN=EGK_11755 PE=3 SV=1;A0A1D5QWP5_MACMU Uncharacterized protein OS=Macaca mul	4	9	9	9	17.3	56.698	482060000	604830000	399710000	575530000	387390000	585800000	668150000	628650000	759670000
G7NPE0	Cadherin 13, H-cadherin (Fragment)	EGK_13052	G7NPE0;F7GKB6;A0A1D5QWS5;A0A1D5RBE9;A0A1D5QG84;A0A1D5Q5E4;A0A1D5Q7X2;A0A1D5QNE9	G7NPE0_MACMU Cadherin 13, H-cadherin (Fragment) OS=Macaca mulatta OX=9544 GN=EGK_13052 PE=4 SV=1;F7GKB6_MACMU Cadherin-13 isoform 1 preproprotein OS=Macaca mulatta OX=9544 GN=CDH13 PE=2 SV=2;A0A1D5QWS5_MACMU Uncharacterized protein OS=Macaca mulatta OX=954	8	11	11	11	22.5	78.136	1434800000	1632600000	1115300000	1458500000	1048300000	1285700000	1827100000	1483000000	1726800000
H9EM76	Alpha-endosulfine isoform 3	ENSA	H9EM76;A0A1D5QWW1;I2CT77;H9EM77;G7MDI0;F6PXF4;A0A1D5RF33;A0A1D5R033;G7MXH4;F7HRZ8;A0A1D5R5Z2	H9EM76_MACMU Alpha-endosulfine isoform 3 OS=Macaca mulatta OX=9544 GN=ENSA PE=2 SV=1;A0A1D5QWW1_MACMU Uncharacterized protein OS=Macaca mulatta OX=9544 GN=ENSA PE=3 SV=1;I2CT77_MACMU Alpha-endosulfine isoform 3 OS=Macaca mulatta OX=9544 GN=ENSA PE=2 SV=1;H	11	2	2	2	17.1	12.975	14161000		17246000	21890000	22826000	36517000	21280000	15749000	18960000
A0A1D5QWX3	Uncharacterized protein	RAP1B	A0A1D5QWX3;G7N7L2;F7B9T3;A0A1D5Q4F6;A0A1D5QH71;A0A1D5QDF8;A0A1D5Q8G7;A0A1D5Q2D6;A0A1D5QAC4;G7MK33;A0A1D5R9N2;F6UG33	A0A1D5QWX3_MACMU Uncharacterized protein OS=Macaca mulatta OX=9544 GN=RAP1B PE=4 SV=1;G7N7L2_MACMU Uncharacterized protein OS=Macaca mulatta OX=9544 GN=EGK_03906 PE=4 SV=1;F7B9T3_MACMU Ras-related protein Rap-1b OS=Macaca mulatta OX=9544 GN=RAP1B PE=2 SV=1	12	8	2	8	38.8	18.778	319900000	496100000	550090000	481760000	438950000	354670000	406880000	332930000	372550000
A0A1D5QWX5	Uncharacterized protein	AP1G1	A0A1D5QWX5;H9YUL9;H9EPI6;G7NQP0	A0A1D5QWX5_MACMU Uncharacterized protein OS=Macaca mulatta OX=9544 GN=AP1G1 PE=4 SV=1;H9YUL9_MACMU AP-1 complex subunit gamma OS=Macaca mulatta OX=9544 GN=AP1G1 PE=2 SV=1;H9EPI6_MACMU AP-1 complex subunit gamma OS=Macaca mulatta OX=9544 GN=AP1G1 PE=2 SV=1;	4	2	2	2	8.6	45.956	14595000		21824000	20362000	24936000	12910000			19796000
H9FJ89	Carnitine O-palmitoyltransferase 1, liver isoform isoform 2 (Fragment)	CPT1A	H9FJ89;A0A1D5QWY4;G7NBU9;F7GJ40	H9FJ89_MACMU Carnitine O-palmitoyltransferase 1, liver isoform isoform 2 (Fragment) OS=Macaca mulatta OX=9544 GN=CPT1A PE=2 SV=1;A0A1D5QWY4_MACMU Uncharacterized protein OS=Macaca mulatta OX=9544 GN=CPT1A PE=3 SV=1;G7NBU9_MACMU Carnitine O-palmitoyltransfe	4	2	2	2	9.2	27.813		31736000	29287000	38710000	28560000			17079000
A0A1D5R8S6	Uncharacterized protein	UBE2V2	A0A1D5R8S6;G7MZ96;H9FZA8;A0A1D5RDZ1;A0A1D5QWZ3;A0A1D5Q9Z5;F6VEY1	A0A1D5R8S6_MACMU Uncharacterized protein OS=Macaca mulatta OX=9544 GN=UBE2V2 PE=4 SV=1;G7MZ96_MACMU Uncharacterized protein (Fragment) OS=Macaca mulatta OX=9544 GN=EGK_18914 PE=4 SV=1;H9FZA8_MACMU Ubiquitin-conjugating enzyme E2 variant 2 OS=Macaca mulatta	7	3	1	1	23.2	16.165		21892000			27963000				37156000
F7G5R7	Aminomethyltransferase	AMT	F7G5R7;A0A1D5QX71;A0A1D5R2H6;A0A1D5R840;G7MIM3	F7G5R7_MACMU Aminomethyltransferase OS=Macaca mulatta OX=9544 GN=AMT PE=3 SV=2;A0A1D5QX71_MACMU Aminomethyltransferase OS=Macaca mulatta OX=9544 GN=AMT PE=2 SV=1;A0A1D5R2H6_MACMU Aminomethyltransferase OS=Macaca mulatta OX=9544 GN=AMT PE=3 SV=1;A0A1D5R840_	5	6	6	6	16.1	41.793	82459000	97086000	70229000	67310000	72205000	65615000	91139000	100600000	111880000
A0A1D5QX94	Sorting nexin	SNX9	A0A1D5QX94;G7MQ21;H9FVI2;F7DMR9;F7DMQ2	A0A1D5QX94_MACMU Sorting nexin OS=Macaca mulatta OX=9544 GN=SNX9 PE=3 SV=1;G7MQ21_MACMU Uncharacterized protein (Fragment) OS=Macaca mulatta OX=9544 GN=EGK_15227 PE=4 SV=1;H9FVI2_MACMU Sorting nexin OS=Macaca mulatta OX=9544 GN=SNX9 PE=2 SV=1;F7DMR9_MACMU	5	1	1	1	2.4	65.794			18713000				18306000	10733000
H9FC15	TMEM189-UBE2V1 fusion protein (Fragment)	UBE2V1	H9FC15;A0A1D5QX99;A0A1D5RBF9;H9Z1Y2;G7N7P5;F7HUE0;A0A1D5REX8;G7N4J8;F6VFV2;A0A1D5R6J2;A0A1D5Q9I5;F6VF23	H9FC15_MACMU TMEM189-UBE2V1 fusion protein (Fragment) OS=Macaca mulatta OX=9544 GN=UBE2V1 PE=2 SV=1;A0A1D5QX99_MACMU Uncharacterized protein OS=Macaca mulatta OX=9544 GN=UBE2V1 PE=4 SV=1;A0A1D5RBF9_MACMU Uncharacterized protein OS=Macaca mulatta OX=9544 GN	12	4	2	4	31.3	15.238	263560000	298320000	263040000	321870000	351200000	325370000	216200000	226590000	254220000
F7FRS5	Uncharacterized protein	AHSA1	F7FRS5;A0A1D5QXA8	F7FRS5_MACMU Uncharacterized protein OS=Macaca mulatta OX=9544 GN=AHSA1 PE=4 SV=2;A0A1D5QXA8_MACMU Activator of 90 kDa heat shock protein ATPase homolog 1 OS=Macaca mulatta OX=9544 GN=AHSA1 PE=2 SV=1	2	5	5	5	26.7	32.317	214710000	254830000	317200000	420520000	630150000	254220000	181540000	184350000	103610000
G7N4N3	Carboxypeptidase	EGK_02341	G7N4N3;A0A1D5QXD6;F7G1E1	G7N4N3_MACMU Carboxypeptidase OS=Macaca mulatta OX=9544 GN=EGK_02341 PE=3 SV=1;A0A1D5QXD6_MACMU Carboxypeptidase OS=Macaca mulatta OX=9544 GN=CTSA PE=3 SV=1;F7G1E1_MACMU Carboxypeptidase OS=Macaca mulatta OX=9544 GN=CTSA PE=2 SV=1	3	2	2	2	5	53.997		15710000	20178000		26922000		32526000
F7A037	Uncharacterized protein	LAMTOR1	F7A037;A0A1D5QXH4;F6V8N1	F7A037_MACMU Uncharacterized protein OS=Macaca mulatta OX=9544 GN=LAMTOR1 PE=4 SV=2;A0A1D5QXH4_MACMU Uncharacterized protein OS=Macaca mulatta OX=9544 GN=LAMTOR1 PE=4 SV=1;F6V8N1_MACMU Ragulator complex protein LAMTOR1 OS=Macaca mulatta OX=9544 GN=LAMTOR1	3	2	2	2	37.4	11.076		36845000	33199000	39613000	34547000	33138000	37566000		32564000
A0A1D5QXI2	Uncharacterized protein	ACTR10	A0A1D5QXI2;F7E2U8;H9FX46;G7MY05	A0A1D5QXI2_MACMU Uncharacterized protein OS=Macaca mulatta OX=9544 GN=ACTR10 PE=4 SV=1;F7E2U8_MACMU Uncharacterized protein OS=Macaca mulatta OX=9544 GN=ACTR10 PE=3 SV=2;H9FX46_MACMU Actin-related protein 10 OS=Macaca mulatta OX=9544 GN=ACTR10 PE=2 SV=1;G7	4	2	2	2	15.1	14.334
H9FXJ0	26S proteasome non-ATPase regulatory subunit 13 isoform 1	PSMD13	H9FXJ0;A0A1D5QXJ6;F7C608;F7C5Z4;A0A1D5QG43	H9FXJ0_MACMU 26S proteasome non-ATPase regulatory subunit 13 isoform 1 OS=Macaca mulatta OX=9544 GN=PSMD13 PE=2 SV=1;A0A1D5QXJ6_MACMU Uncharacterized protein OS=Macaca mulatta OX=9544 GN=PSMD13 PE=4 SV=1;F7C608_MACMU Uncharacterized protein OS=Macaca mulat	5	10	10	10	36.7	42.932	119760000	226490000	293290000	244870000	339260000	226000000	159800000	137390000	172590000
A0A1D5QXQ9	Uncharacterized protein	COPZ1	A0A1D5QXQ9;I0FQ09;A0A1D5QA72;A0A1D5QQE1;F7CYT2;A0A1D5QX89;G7N768	A0A1D5QXQ9_MACMU Uncharacterized protein OS=Macaca mulatta OX=9544 GN=COPZ1 PE=4 SV=1;I0FQ09_MACMU Coatomer subunit zeta-1 OS=Macaca mulatta OX=9544 GN=COPZ1 PE=2 SV=1;A0A1D5QA72_MACMU Uncharacterized protein OS=Macaca mulatta OX=9544 GN=COPZ1 PE=4 SV=1;A0	7	2	2	2	15	18.374	11498000	22772000	34527000	37233000	73941000	20657000	18285000	14159000	13541000
A0A1D5QXR8	Uncharacterized protein	NAA50	A0A1D5QXR8;F7CQ64;F7HM45;G7MKC1;H9G035	A0A1D5QXR8_MACMU Uncharacterized protein OS=Macaca mulatta OX=9544 GN=NAA50 PE=4 SV=1;F7CQ64_MACMU Uncharacterized protein OS=Macaca mulatta OX=9544 GN=NAA50 PE=4 SV=2;F7HM45_MACMU Uncharacterized protein OS=Macaca mulatta OX=9544 GN=NAA50 PE=4 SV=2;G7MKC1	5	1	1	1	19	6.6445			42328000	41415000	92659000	46568000	19255000
A0A1D5QXU5	Uncharacterized protein	PPM1G	A0A1D5QXU5;F7H947;G7N9P2;F7H941	A0A1D5QXU5_MACMU Uncharacterized protein OS=Macaca mulatta OX=9544 GN=PPM1G PE=4 SV=1;F7H947_MACMU Uncharacterized protein OS=Macaca mulatta OX=9544 GN=PPM1G PE=3 SV=2;G7N9P2_MACMU Uncharacterized protein OS=Macaca mulatta OX=9544 GN=EGK_05167 PE=3 SV=1;F7	4	6	6	6	14.8	55.718		18258000	39349000	50975000	68032000	21671000
A0A1D5QXZ0	Transthyretin	TTR	A0A1D5QXZ0;F6VU69	A0A1D5QXZ0_MACMU Transthyretin OS=Macaca mulatta OX=9544 GN=TTR PE=2 SV=1;F6VU69_MACMU Transthyretin OS=Macaca mulatta OX=9544 GN=TTR PE=3 SV=2	2	4	4	4	49	15.831	276800000	289920000	588940000	286800000	166650000	351180000	173660000	397690000	336470000
A0A1D5QXZ1	Uncharacterized protein	HRC	A0A1D5QXZ1;F6Q586;A0A1D5R453	A0A1D5QXZ1_MACMU Uncharacterized protein OS=Macaca mulatta OX=9544 GN=HRC PE=4 SV=1;F6Q586_MACMU Uncharacterized protein OS=Macaca mulatta OX=9544 GN=HRC PE=4 SV=2;A0A1D5R453_MACMU Uncharacterized protein OS=Macaca mulatta OX=9544 GN=HRC PE=4 SV=1	3	6	6	6	16	74.448	453850000	492100000	297260000	308540000	353370000	340140000	431310000	364650000	434060000
A0A1D5RER9	Uncharacterized protein	EIF4E	A0A1D5RER9;G7MTF6;H9ENS9;F7GKR8;A0A1D5R443;A0A1D5RIN9;A0A1D5QY25	A0A1D5RER9_MACMU Uncharacterized protein OS=Macaca mulatta OX=9544 GN=EIF4E PE=3 SV=1;G7MTF6_MACMU Uncharacterized protein OS=Macaca mulatta OX=9544 GN=EGK_15934 PE=3 SV=1;H9ENS9_MACMU Eukaryotic translation initiation factor 4E isoform 1 OS=Macaca mulatta	7	2	2	2	14	20.425	37218000	41769000	48865000	27355000	36024000	32959000
A0A1D5QY92	Uncharacterized protein	HNRNPM	A0A1D5QY92;F6ZI22;H9FL39;H9FL40;F7AAV7;G7NNA6;F6ZI29;F7AAU1;F7AAS2	A0A1D5QY92_MACMU Uncharacterized protein OS=Macaca mulatta OX=9544 GN=HNRNPM PE=4 SV=1;F6ZI22_MACMU Uncharacterized protein OS=Macaca mulatta OX=9544 GN=HNRNPM PE=4 SV=2;H9FL39_MACMU Heterogeneous nuclear ribonucleoprotein M isoform b (Fragment) OS=Macaca	9	24	24	24	44.4	73.674	735080000	847900000	1368000000	1389400000	1989300000	1009800000	868530000	482530000	591200000
F7GAF7	Uncharacterized protein	ITIH4	F7GAF7;F7HL85;F7GAG4;A0A1D5QYD0	F7GAF7_MACMU Uncharacterized protein OS=Macaca mulatta OX=9544 GN=ITIH4 PE=4 SV=2;F7HL85_MACMU Uncharacterized protein OS=Macaca mulatta OX=9544 GN=ITIH4 PE=4 SV=2;F7GAG4_MACMU Uncharacterized protein OS=Macaca mulatta OX=9544 GN=ITIH4 PE=4 SV=2;A0A1D5QYD0	4	11	1	1	15.8	98.728	46166000	38603000	23120000
F6XB89	Uncharacterized protein	TMEM182	F6XB89;A0A1D5QYS0	F6XB89_MACMU Uncharacterized protein OS=Macaca mulatta OX=9544 GN=TMEM182 PE=4 SV=2;A0A1D5QYS0_MACMU Uncharacterized protein OS=Macaca mulatta OX=9544 GN=TMEM182 PE=4 SV=1	2	1	1	1	5.4	21.213	43752000	73106000	70119000		66775000			78770000
A0A1D5QYU3	Tubulin beta chain	TUBB4B	A0A1D5QYU3;H9H582;F7GW57;F7H0X2;A0A1D5QJR6;A0A1D5RGR1;H9FJP4;A0A1D5QZ85;F7DCY3;F7DIZ0;F7HLH3;A0A1D5RBK2;G7MSG6;F6XQ37;CON__ENSEMBL:ENSBTAP00000025008;H9H380	A0A1D5QYU3_MACMU Tubulin beta chain OS=Macaca mulatta OX=9544 GN=TUBB4B PE=3 SV=1;H9H582_MACMU Tubulin beta chain OS=Macaca mulatta OX=9544 GN=TUBB4B PE=3 SV=2;F7GW57_MACMU Tubulin beta chain OS=Macaca mulatta OX=9544 GN=TUBB4B PE=3 SV=2;F7H0X2_MACMU Tubul	16	21	1	21	65.2	49.83	5744900000	7106000000	11796000000	9164200000	13151000000	8500500000	7071100000	4913100000	6020000000
F7DZ68	Uncharacterized protein	EIF3K	F7DZ68;H9FT33;A0A1D5QYW8;A0A1D5R5X7;F6XGZ8;A0A1D5QL93	F7DZ68_MACMU Uncharacterized protein OS=Macaca mulatta OX=9544 GN=EIF3K PE=4 SV=2;H9FT33_MACMU Eukaryotic translation initiation factor 3 subunit K OS=Macaca mulatta OX=9544 GN=EIF3K PE=2 SV=1;A0A1D5QYW8_MACMU Eukaryotic translation initiation factor 3 sub	6	2	2	2	15.3	15.831			29523000	37044000		24464000
H9FML1	NADH dehydrogenase [ubiquinone] 1 alpha subcomplex subunit 10, mitochondrial	NDUFA10	H9FML1;A0A1D5QYX5;F7D9V9;I2CTH3;F7D9V1;A0A1D5RJB9	H9FML1_MACMU NADH dehydrogenase [ubiquinone] 1 alpha subcomplex subunit 10, mitochondrial OS=Macaca mulatta OX=9544 GN=NDUFA10 PE=2 SV=1;A0A1D5QYX5_MACMU NADH dehydrogenase [ubiquinone] 1 alpha subcomplex subunit 10, mitochondrial OS=Macaca mulatta OX=9544	6	15	15	15	43.4	40.885	4454800000	4232500000	2372800000	3619000000	3201900000	2508300000	3814300000	4586100000	4470900000
H9FNI9	Proteasome activator complex subunit 3 isoform 1	PSME3	H9FNI9;A0A1D5QZ01;G7NIN5;A0A1D5QQS8;A0A1D5R3V1;A0A1D5RB93;F7E2B2	H9FNI9_MACMU Proteasome activator complex subunit 3 isoform 1 OS=Macaca mulatta OX=9544 GN=PSME3 PE=2 SV=1;A0A1D5QZ01_MACMU Uncharacterized protein OS=Macaca mulatta OX=9544 GN=PSME3 PE=4 SV=1;G7NIN5_MACMU Uncharacterized protein OS=Macaca mulatta OX=9544	7	4	4	4	16.1	29.506			56746000	83573000	60761000	42245000	45646000
Q28500	Protein C inhibitor		Q28500;F6SL66;A0A1D5QZ04;G7MW29	Q28500_MACMU Protein C inhibitor OS=Macaca mulatta OX=9544 PE=2 SV=1;F6SL66_MACMU Uncharacterized protein OS=Macaca mulatta OX=9544 GN=SERPINA5 PE=3 SV=2;A0A1D5QZ04_MACMU Uncharacterized protein OS=Macaca mulatta OX=9544 GN=SERPINA5 PE=3 SV=1;G7MW29_MACMU	4	2	2	2	11.7	25.857	139930000	26069000					121960000
A0A1D5REW6	Uncharacterized protein	C8B	A0A1D5REW6;F6TP36;A0A1D5QZ18;G7MH97;A0A1D5RJJ1	A0A1D5REW6_MACMU Uncharacterized protein OS=Macaca mulatta OX=9544 GN=C8B PE=4 SV=1;F6TP36_MACMU Uncharacterized protein OS=Macaca mulatta OX=9544 GN=C8B PE=4 SV=2;A0A1D5QZ18_MACMU Uncharacterized protein OS=Macaca mulatta OX=9544 GN=C8B PE=4 SV=1;G7MH97_M	5	3	3	3	6.2	59.95		43300000	101430000	47354000				30152000	32631000
A0A1D5QZ41	Uncharacterized protein	MYL7	A0A1D5QZ41;G7MLE2;F6PLW4	A0A1D5QZ41_MACMU Uncharacterized protein OS=Macaca mulatta OX=9544 GN=MYL7 PE=4 SV=1;G7MLE2_MACMU Uncharacterized protein (Fragment) OS=Macaca mulatta OX=9544 GN=EGK_13735 PE=4 SV=1;F6PLW4_MACMU Uncharacterized protein OS=Macaca mulatta OX=9544 GN=MYL7 PE=	3	3	3	3	27.4	19.462			16943000				33608000	106740000	42967000
G7NNI8	Uncharacterized protein (Fragment)	EGK_10574	G7NNI8;A0A1D5R031;A0A1D5QZ63;F7HU82;H9G071;A0A1D5R787;A0A1D5QM26;A0A1D5QVL6	G7NNI8_MACMU Uncharacterized protein (Fragment) OS=Macaca mulatta OX=9544 GN=EGK_10574 PE=4 SV=1;A0A1D5R031_MACMU Uncharacterized protein OS=Macaca mulatta OX=9544 GN=ACTN4 PE=4 SV=1;A0A1D5QZ63_MACMU Uncharacterized protein OS=Macaca mulatta OX=9544 GN=ACT	8	48	30	37	63.2	100.92	2388300000	2995300000	7864400000	3506200000	5774300000	3044800000	2510100000	1516500000	1993200000
G7NFA6	Uncharacterized protein	EGK_07538	G7NFA6;F7HIX4;F7FGG6;F7CEW9;F6TYF1;F7GX65;F7GHH6;A0A1D5QZ96;A0A1D5RBD8;A0A1D5QVT1;G7N1S9;A0A1D5QF77;F7EWC6;F7DHU9;F7GMI5;G8F140	G7NFA6_MACMU Uncharacterized protein OS=Macaca mulatta OX=9544 GN=EGK_07538 PE=3 SV=1;F7HIX4_MACMU 60S ribosomal protein L23a OS=Macaca mulatta OX=9544 GN=LOC718737 PE=2 SV=1;F7FGG6_MACMU Uncharacterized protein OS=Macaca mulatta OX=9544 GN=LOC721751 PE=3	16	5	5	5	32.7	17.721	171910000	284850000	593780000	468220000	826120000	424070000	455550000	191200000	232580000
A0A1D5QZD6	NADH dehydrogenase [ubiquinone] 1 beta subcomplex subunit 6 isoform 1	NDUFB6	A0A1D5QZD6;H9F2G2;G7NFP0;F7HQ00;F7HPZ8;B6F0M9	A0A1D5QZD6_MACMU NADH dehydrogenase [ubiquinone] 1 beta subcomplex subunit 6 isoform 1 OS=Macaca mulatta OX=9544 GN=NDUFB6 PE=2 SV=1;H9F2G2_MACMU NADH dehydrogenase [ubiquinone] 1 beta subcomplex subunit 6 isoform 1 (Fragment) OS=Macaca mulatta OX=9544 GN=	6	5	5	5	44.5	15.4	1306300000	1534400000	801780000	1108200000	866150000	1097600000	1069200000	1359500000	984450000
F7FZR2	Uncharacterized protein	LETM1	F7FZR2;H9FUB2;A0A1D5QZE9;A0A1D5Q313	F7FZR2_MACMU Uncharacterized protein OS=Macaca mulatta OX=9544 GN=LETM1 PE=4 SV=2;H9FUB2_MACMU LETM1 and EF-hand domain-containing protein 1, mitochondrial OS=Macaca mulatta OX=9544 GN=LETM1 PE=2 SV=1;A0A1D5QZE9_MACMU Uncharacterized protein OS=Macaca mula	4	17	17	17	30.1	83.159	993050000	875740000	668280000	740000000	730340000	762340000	941090000	857230000	840150000
A0A1D5QZG5	ATP synthase-coupling factor 6, mitochondrial	ATP5PF	A0A1D5QZG5;F7E138;A0A1D5QS15	A0A1D5QZG5_MACMU ATP synthase-coupling factor 6, mitochondrial OS=Macaca mulatta OX=9544 GN=ATP5PF PE=2 SV=1;F7E138_MACMU Uncharacterized protein OS=Macaca mulatta OX=9544 GN=ATP5PF PE=4 SV=2	3	7	7	7	50.9	12.586	380520000	323210000	466060000	1116800000	2047800000	1019600000	534140000	462450000	463680000
A0A1D5QZM8	Calponin	CNN3	A0A1D5QZM8;F7G309;F6Q743;I2CTD6;H9FMM8	A0A1D5QZM8_MACMU Calponin OS=Macaca mulatta OX=9544 GN=CNN3 PE=3 SV=1;F7G309_MACMU Calponin OS=Macaca mulatta OX=9544 GN=CNN3 PE=2 SV=1;F6Q743_MACMU Calponin OS=Macaca mulatta OX=9544 GN=CNN2 PE=3 SV=2;I2CTD6_MACMU Calponin OS=Macaca mulatta OX=9544 GN=CNN	5	2	2	2	7.4	31.384		51265000	58432000	41060000	76367000	33588000	26585000
I0FW14	Alpha-actinin-1 isoform c	ACTN1	I0FW14;A0A1D5QZP3;A0A1D5QE04;H9YUP4;A0A1D5QQQ6;H9F1Z8;H9F1Z7;H9F1Z6;G7MYI2;A0A1D5RC86;A0A1D5QLI7;H9FCF4;H9FCF5	I0FW14_MACMU Alpha-actinin-1 isoform c OS=Macaca mulatta OX=9544 GN=ACTN1 PE=2 SV=1;A0A1D5QZP3_MACMU Uncharacterized protein OS=Macaca mulatta OX=9544 GN=ACTN1 PE=4 SV=1;A0A1D5QE04_MACMU Uncharacterized protein OS=Macaca mulatta OX=9544 GN=ACTN1 PE=4 SV=1;	13	46	25	25	62.9	102.68	604750000	724160000	2406500000	669960000	905730000	595760000	624330000	397910000	529790000
G7N2I3	Uncharacterized protein (Fragment)	EGK_19880	G7N2I3;F7EC61;H9FN73;A0A1D5QZS0;A0A1D5QVF3;A0A1D5QW16;G7N2I2;F6X2M0	G7N2I3_MACMU Uncharacterized protein (Fragment) OS=Macaca mulatta OX=9544 GN=EGK_19880 PE=4 SV=1;F7EC61_MACMU Uncharacterized protein OS=Macaca mulatta OX=9544 GN=IFIT3 PE=4 SV=2;H9FN73_MACMU Interferon-induced protein with tetratricopeptide repeats 3 OS=M	8	6	6	6	15.2	55.662	24393000	45188000		23647000		12395000	145590000		52779000
A0A1D5R056	Uncharacterized protein	NCOR2	A0A1D5R056;F7GMR8;I0FWN8;F7DM20;A0A1D5RHE4;I0FWN7;I0FWN5;I0FWN6	A0A1D5R056_MACMU Uncharacterized protein OS=Macaca mulatta OX=9544 GN=NCOR2 PE=4 SV=1;F7GMR8_MACMU Uncharacterized protein OS=Macaca mulatta OX=9544 GN=NCOR2 PE=4 SV=2;I0FWN8_MACMU Nuclear receptor corepressor 2 isoform 2 OS=Macaca mulatta OX=9544 GN=NCOR2	8	1	1	1	0.4	261.05			63252000	75051000	95075000	46064000
H9ERL2	Nucleosome assembly protein 1-like 4	NAP1L4	H9ERL2;F7BXG6;A0A1D5R076;G7NBM6;A0A1D5QG66	H9ERL2_MACMU Nucleosome assembly protein 1-like 4 OS=Macaca mulatta OX=9544 GN=NAP1L4 PE=2 SV=1;F7BXG6_MACMU Uncharacterized protein OS=Macaca mulatta OX=9544 GN=NAP1L4 PE=3 SV=2;A0A1D5R076_MACMU Uncharacterized protein OS=Macaca mulatta OX=9544 GN=NAP1L4	5	7	6	7	26.4	42.894	246150000	274080000	295380000	313680000	414350000	268470000	310200000	248590000	309570000
F7H1R1	Uncharacterized protein	CPSF6	F7H1R1;I0FJW8;F7H1Q9;G7N7L8;A0A1D5R0C8	F7H1R1_MACMU Uncharacterized protein OS=Macaca mulatta OX=9544 GN=CPSF6 PE=4 SV=2;I0FJW8_MACMU Cleavage and polyadenylation specificity factor subunit 6 OS=Macaca mulatta OX=9544 GN=CPSF6 PE=2 SV=1;F7H1Q9_MACMU Uncharacterized protein OS=Macaca mulatta OX=	5	2	2	2	8.2	52.475		14202000	20274000	40897000			16909000
H9F1J9	Luc7-like protein 3 (Fragment)	LUC7L3	H9F1J9;H9ZA17;F6R6L8;A0A1D5R0D5;F7H6R2;F6R6K9	H9F1J9_MACMU Luc7-like protein 3 (Fragment) OS=Macaca mulatta OX=9544 GN=LUC7L3 PE=2 SV=1;H9ZA17_MACMU Luc7-like protein 3 OS=Macaca mulatta OX=9544 GN=LUC7L3 PE=2 SV=1;F6R6L8_MACMU Uncharacterized protein OS=Macaca mulatta OX=9544 GN=LUC7L3 PE=4 SV=1;A0A1	6	3	2	3	17.7	28.541			17159000	11224000
F6SQU7	Uncharacterized protein	OXSR1	F6SQU7;G7MJ14;A0A1D5R0F4	F6SQU7_MACMU Uncharacterized protein OS=Macaca mulatta OX=9544 GN=OXSR1 PE=4 SV=2;G7MJ14_MACMU Uncharacterized protein OS=Macaca mulatta OX=9544 GN=EGK_11794 PE=4 SV=1;A0A1D5R0F4_MACMU Serine/threonine-protein kinase OSR1 OS=Macaca mulatta OX=9544 GN=OXSR1	3	3	3	3	7.3	57.185	42412000	52216000	47018000	56072000	54947000	49167000	54410000	51227000	46883000
A0A1D5R0G7	Uncharacterized protein	LOC716487	A0A1D5R0G7;F7EFK7;A0A1D5QYW6	A0A1D5R0G7_MACMU Uncharacterized protein OS=Macaca mulatta OX=9544 GN=LOC716487 PE=3 SV=1;F7EFK7_MACMU NADH dehydrogenase [ubiquinone] iron-sulfur protein 8, mitochondrial OS=Macaca mulatta OX=9544 GN=NDUFS8 PE=2 SV=1;A0A1D5QYW6_MACMU Uncharacterized prote	3	8	8	8	34.8	22.507	2186600000	1575600000	1247500000	1797800000	1418200000	1161700000	1641500000	1883800000	2134600000
G7N5C0	Uncharacterized protein (Fragment)	EGK_04141	G7N5C0;A0A1D5R0K1;F7HS92;I0FNS0	G7N5C0_MACMU Uncharacterized protein (Fragment) OS=Macaca mulatta OX=9544 GN=EGK_04141 PE=4 SV=1;A0A1D5R0K1_MACMU Uncharacterized protein OS=Macaca mulatta OX=9544 GN=CKAP4 PE=4 SV=1;F7HS92_MACMU Uncharacterized protein OS=Macaca mulatta OX=9544 GN=CKAP4 P	4	6	6	6	18.6	49.68				18782000	53765000
H9EZK5	Pre-rRNA-processing protein TSR1 homolog (Fragment)	TSR1	H9EZK5;A0A1D5R0N3;F6UUW8;G7NHT8	H9EZK5_MACMU Pre-rRNA-processing protein TSR1 homolog (Fragment) OS=Macaca mulatta OX=9544 GN=TSR1 PE=2 SV=1;A0A1D5R0N3_MACMU Uncharacterized protein OS=Macaca mulatta OX=9544 GN=TSR1 PE=4 SV=1;F6UUW8_MACMU Uncharacterized protein OS=Macaca mulatta OX=9544	4	2	2	2	3.5	85.252									114860000
A0A1D5R0P5	Uncharacterized protein	CPNE3	A0A1D5R0P5;H9ESU0;G7MZQ0;F7HIT5	A0A1D5R0P5_MACMU Uncharacterized protein OS=Macaca mulatta OX=9544 GN=CPNE3 PE=4 SV=1;H9ESU0_MACMU Copine-3 OS=Macaca mulatta OX=9544 GN=CPNE3 PE=2 SV=1;G7MZQ0_MACMU Copine III OS=Macaca mulatta OX=9544 GN=EGK_19098 PE=4 SV=1;F7HIT5_MACMU Uncharacterized p	4	3	2	3	4.9	59.765	62454000	55187000	53176000	52862000	66115000	49819000	60629000	105940000	50502000
A0A1D5R0R5	Very-long-chain (3R)-3-hydroxyacyl-CoA dehydratase	HACD3	A0A1D5R0R5;H9FMP1;G7MXU9;F6QBD9;A0A1D5RKZ8;F7GNG2;A0A1D5QW53	A0A1D5R0R5_MACMU Very-long-chain (3R)-3-hydroxyacyl-CoA dehydratase OS=Macaca mulatta OX=9544 GN=HACD3 PE=3 SV=1;H9FMP1_MACMU Very-long-chain (3R)-3-hydroxyacyl-CoA dehydratase OS=Macaca mulatta OX=9544 GN=PTPLAD1 PE=2 SV=1;G7MXU9_MACMU Very-long-chain (3R	7	2	2	2	11.4	36.444	39073000		75984000	40858000	70816000	56541000	98372000	60020000
H9FCE4	Histone H2B (Fragment)	HIST1H2BK	H9FCE4;I2CTI8;I0FVV7;G7MR89;G7MR33;F7HAP1;A0A1D5R0R7;F7BDR4;A0A1D5RL66;G7MGF0;I0FVV5;G7MR45;A0A1D5RGX5;A0A1D5RBZ3;H9F6F5;G7MR41;G7MR57;F6TWY4;G7MR93;G7MR65;G7MR25;G7MQV4;G7MGF2;G7MZ97;F6SNQ8;G7MQV5	H9FCE4_MACMU Histone H2B (Fragment) OS=Macaca mulatta OX=9544 GN=HIST1H2BK PE=2 SV=1;I2CTI8_MACMU Histone H2B OS=Macaca mulatta OX=9544 GN=HIST1H2BD PE=2 SV=1;I0FVV7_MACMU Histone H2B OS=Macaca mulatta OX=9544 GN=HIST1H2BK PE=2 SV=1;G7MR89_MACMU Histone H2	26	8	0	2	53.6	13.759	1143300000	1342200000	1828700000	1253000000	1362100000	944500000	1292400000	1091500000	1142200000
A0A1D5R0T4	Uncharacterized protein	LOC714566	A0A1D5R0T4	A0A1D5R0T4_MACMU Uncharacterized protein OS=Macaca mulatta OX=9544 GN=LOC714566 PE=4 SV=1	1	10	5	10	6.2	203.35	338380000	375170000	338960000	324350000	254320000	304070000	436870000	343770000	339650000
A0A1D5R0U6	ATPase family AAA domain-containing protein 1	ATAD1	A0A1D5R0U6;F7HUI2;G7N2G9;G8F1K8;A0A1D5QDB7	A0A1D5R0U6_MACMU ATPase family AAA domain-containing protein 1 OS=Macaca mulatta OX=9544 GN=ATAD1 PE=2 SV=1;F7HUI2_MACMU Uncharacterized protein OS=Macaca mulatta OX=9544 GN=ATAD1 PE=3 SV=2;G7N2G9_MACMU Uncharacterized protein OS=Macaca mulatta OX=9544 GN=	5	6	6	6	24.1	40.744	153990000	157960000	121560000	131700000	141230000	174150000	162450000	122960000	178740000
A0A1D5R0W5	Sorting and assembly machinery component 50 homolog	SAMM50	A0A1D5R0W5;F6QBT9	A0A1D5R0W5_MACMU Sorting and assembly machinery component 50 homolog OS=Macaca mulatta OX=9544 GN=SAMM50 PE=2 SV=1;F6QBT9_MACMU Uncharacterized protein OS=Macaca mulatta OX=9544 GN=SAMM50 PE=4 SV=2	2	20	20	20	48.8	51.942	1552200000	1615200000	1018700000	1406800000	1414200000	1636100000	1456800000	1568100000	1636100000
F6R907	Uncharacterized protein	NOLC1	F6R907;H9G1U1;A0A1D5R0X1;I2CUA7;H9G1U0;G7N101	F6R907_MACMU Uncharacterized protein OS=Macaca mulatta OX=9544 GN=NOLC1 PE=4 SV=2;H9G1U1_MACMU Nucleolar and coiled-body phosphoprotein 1 OS=Macaca mulatta OX=9544 GN=NOLC1 PE=2 SV=1;A0A1D5R0X1_MACMU Uncharacterized protein OS=Macaca mulatta OX=9544 GN=NOL	6	3	3	3	5.8	71.458	9948800	9931000	57082000	23523000	150030000	29390000
H9FRP8	28S ribosomal protein S27, mitochondrial	MRPS27	H9FRP8;G7MU93;F7F0Y5;A0A1D5R0Z4	H9FRP8_MACMU 28S ribosomal protein S27, mitochondrial OS=Macaca mulatta OX=9544 GN=MRPS27 PE=2 SV=1;G7MU93_MACMU Uncharacterized protein OS=Macaca mulatta OX=9544 GN=EGK_16568 PE=4 SV=1;F7F0Y5_MACMU Uncharacterized protein OS=Macaca mulatta OX=9544 GN=MRPS	4	3	3	3	7.2	47.961			28890000				33494000	50795000
F6S907	Uncharacterized protein	PCYT2	F6S907;A0A1D5R107;I0FTU5;H9FXW3;A0A1D5R1D5;A0A1D5QCI6;G7NHA8	F6S907_MACMU Uncharacterized protein OS=Macaca mulatta OX=9544 GN=PCYT2 PE=4 SV=2;A0A1D5R107_MACMU Uncharacterized protein OS=Macaca mulatta OX=9544 GN=PCYT2 PE=4 SV=1;I0FTU5_MACMU Ethanolamine-phosphate cytidylyltransferase isoform 2 OS=Macaca mulatta OX=	7	2	2	2	6.5	41.428	39363000	31370000	17424000		16314000	24452000	12884000	20421000
I2CYU7	Translationally-controlled tumor protein	TPT1	I2CYU7;F6U612;A0A1D5R125;F7HLW4;G7N156;A0A1D5QZX1;I0FUR2;F7HHD5;G7NG28	I2CYU7_MACMU Translationally-controlled tumor protein OS=Macaca mulatta OX=9544 GN=TPT1 PE=2 SV=1;F6U612_MACMU Uncharacterized protein OS=Macaca mulatta OX=9544 GN=LOC711798 PE=3 SV=2;A0A1D5R125_MACMU Uncharacterized protein OS=Macaca mulatta OX=9544 GN=LO	9	7	7	7	36.6	19.595	681880000	631800000	763110000	805090000	1048100000	586570000	685360000	510860000	648090000
F6VC72	DNA helicase	MCM6	F6VC72;A0A1D5R126	F6VC72_MACMU DNA helicase OS=Macaca mulatta OX=9544 GN=MCM6 PE=3 SV=2;A0A1D5R126_MACMU DNA helicase OS=Macaca mulatta OX=9544 GN=MCM6 PE=2 SV=1	2	4	4	4	5.8	91.958			28698000	39689000	73705000
A0A1D5R187	Nucleoside diphosphate kinase	NME2	A0A1D5R187	A0A1D5R187_MACMU Nucleoside diphosphate kinase OS=Macaca mulatta OX=9544 GN=NME2 PE=3 SV=1	1	9	1	1	65.1	17.223	89077000	120570000	252280000	185500000	340890000	183950000	47157000	58790000	60408000
A0A1D5R199	Uncharacterized protein	MYBPC3	A0A1D5R199	A0A1D5R199_MACMU Uncharacterized protein OS=Macaca mulatta OX=9544 GN=MYBPC3 PE=4 SV=1	1	80	1	1	70	139.88		197510000	185280000			111770000	145600000	106130000	179570000
A0A1D5R1C2	Poly [ADP-ribose] polymerase	PARP1	A0A1D5R1C2;F7EMW7;H9FQ77;G7MEE5	A0A1D5R1C2_MACMU Poly [ADP-ribose] polymerase OS=Macaca mulatta OX=9544 GN=PARP1 PE=4 SV=1;F7EMW7_MACMU Poly [ADP-ribose] polymerase OS=Macaca mulatta OX=9544 GN=PARP1 PE=4 SV=1;H9FQ77_MACMU Poly [ADP-ribose] polymerase OS=Macaca mulatta OX=9544 GN=PARP1 P	4	10	10	10	12.4	112.36		23762000	220790000	131550000	273490000	72562000	45041000	54152000	36000000
H9EVA3	Synaptojanin-2-binding protein	SYNJ2BP	H9EVA3;A0A1D5R1G0	H9EVA3_MACMU Synaptojanin-2-binding protein OS=Macaca mulatta OX=9544 GN=SYNJ2BP PE=2 SV=1;A0A1D5R1G0_MACMU Uncharacterized protein OS=Macaca mulatta OX=9544 GN=COX16 PE=4 SV=1	2	1	1	1	8.3	15.91
H9ESY3	Acylpyruvase FAHD1, mitochondrial isoform 2	FAHD1	H9ESY3;F6YDT1;A0A1D5R1I7	H9ESY3_MACMU Acylpyruvase FAHD1, mitochondrial isoform 2 OS=Macaca mulatta OX=9544 GN=FAHD1 PE=2 SV=1;F6YDT1_MACMU Fumarylacetoacetate hydrolase domain containing 1 OS=Macaca mulatta OX=9544 GN=FAHD1 PE=4 SV=1;A0A1D5R1I7_MACMU Fumarylacetoacetate hydrolase	3	3	3	3	27.2	24.882	61665000		75353000	58885000	67845000	53390000	82713000	62049000	63389000
H9ETJ9	Vesicle transport protein GOT1B	GOLT1B	H9ETJ9;A0A1D5R1M2;F7G341	H9ETJ9_MACMU Vesicle transport protein GOT1B OS=Macaca mulatta OX=9544 GN=GOLT1B PE=2 SV=1;A0A1D5R1M2_MACMU Golgi transport 1-like protein B OS=Macaca mulatta OX=9544 GN=GOLT1B PE=4 SV=1;F7G341_MACMU Uncharacterized protein OS=Macaca mulatta OX=9544 GN=GOL	3	1	1	1	10.1	15.411					20518000
A0A1D5R1N5	Adipocyte-type fatty acid-binding protein	FABP4	A0A1D5R1N5;A0A1D5RDW1;F7GMK1	A0A1D5R1N5_MACMU Adipocyte-type fatty acid-binding protein OS=Macaca mulatta OX=9544 GN=FABP4 PE=2 SV=1	3	9	9	9	59.1	14.762	5625300000	4786800000	1327200000	2307400000	1160900000	2080600000	3263700000	3073800000	2525200000
A0A1D5R1P2	Transmembrane emp24 domain-containing protein 10	TMED10	A0A1D5R1P2;F6U7E8	A0A1D5R1P2_MACMU Transmembrane emp24 domain-containing protein 10 OS=Macaca mulatta OX=9544 GN=TMED10 PE=2 SV=1;F6U7E8_MACMU Uncharacterized protein OS=Macaca mulatta OX=9544 GN=TMED10 PE=3 SV=2	2	6	6	6	32	24.968	66708000	125030000	159730000	151890000	217650000	123180000	188090000	97643000	122330000
F7GVW2	Alpha-galactosidase	NAGA	F7GVW2;A0A1D5R1R4;G7N431;H9FI50;H9F435	F7GVW2_MACMU Alpha-galactosidase OS=Macaca mulatta OX=9544 GN=NAGA PE=3 SV=2;A0A1D5R1R4_MACMU Alpha-galactosidase OS=Macaca mulatta OX=9544 GN=NAGA PE=3 SV=1;G7N431_MACMU Alpha-galactosidase OS=Macaca mulatta OX=9544 GN=EGK_03105 PE=3 SV=1;H9FI50_MACMU Alp	5	2	2	2	5.6	46.333	50501000			49089000	60725000	88958000			56021000
A0A1D5R1S4	Uncharacterized protein	LOC699117	A0A1D5R1S4	A0A1D5R1S4_MACMU Uncharacterized protein OS=Macaca mulatta OX=9544 GN=LOC699117 PE=4 SV=1	1	5	0	2	50.7	15.803					165420000
A0A1D5R1V1	Tubulin alpha chain	TUBA1C	A0A1D5R1V1;F7GY36;F7EMX4;F7H8S5;F6X061	A0A1D5R1V1_MACMU Tubulin alpha chain OS=Macaca mulatta OX=9544 GN=TUBA1C PE=3 SV=1;F7GY36_MACMU Tubulin alpha chain OS=Macaca mulatta OX=9544 GN=TUBA1C PE=3 SV=2;F7EMX4_MACMU Tubulin alpha chain OS=Macaca mulatta OX=9544 GN=TUBA1C PE=3 SV=1;F7H8S5_MACMU Tu	5	19	1	1	52.6	49.895				48314000
A0A1D5R1V4	Uncharacterized protein	LDB3	A0A1D5R1V4;F6QFS9;G7N203;H9EZK4;H9EZ97;A0A1D5RCX3;H9F4W2	A0A1D5R1V4_MACMU Uncharacterized protein OS=Macaca mulatta OX=9544 GN=LDB3 PE=4 SV=1;F6QFS9_MACMU Uncharacterized protein OS=Macaca mulatta OX=9544 GN=LDB3 PE=4 SV=2;G7N203_MACMU Uncharacterized protein OS=Macaca mulatta OX=9544 GN=EGK_19665 PE=4 SV=1;H9EZ	7	24	0	2	54.3	72.092	944740000	1350100000	1023400000	960470000	683790000	524190000	491220000	1357800000	2106000000
A0A1D5R1X3	Uncharacterized protein	MIPEP	A0A1D5R1X3;I2CV52;I0FRU6;H9Z290;H9FUK8;G7NJS3;F7E1F8;A0A1D5RJN8	A0A1D5R1X3_MACMU Uncharacterized protein OS=Macaca mulatta OX=9544 GN=MIPEP PE=3 SV=1;I2CV52_MACMU Mitochondrial intermediate peptidase OS=Macaca mulatta OX=9544 GN=MIPEP PE=2 SV=1;I0FRU6_MACMU Mitochondrial intermediate peptidase OS=Macaca mulatta OX=9544	8	3	3	3	4.3	79.605		18155000		17299000					21344000
A0A1D5R1Y1	Uncharacterized protein	SRP19	A0A1D5R1Y1;H9ETP4	A0A1D5R1Y1_MACMU Uncharacterized protein OS=Macaca mulatta OX=9544 GN=SRP19 PE=4 SV=1;H9ETP4_MACMU Signal recognition particle 19 kDa protein OS=Macaca mulatta OX=9544 GN=SRP19 PE=2 SV=1	2	1	1	1	12.5	13.624							7863200
F6U527	Uncharacterized protein	TNNT3	F6U527;F6U519;G7NBL7;F6U509;A0A1D5R5S4;F7AUJ7;A0A1D5R218;F6U551;F6U543	F6U527_MACMU Uncharacterized protein OS=Macaca mulatta OX=9544 GN=TNNT3 PE=4 SV=2;F6U519_MACMU Uncharacterized protein OS=Macaca mulatta OX=9544 GN=TNNT3 PE=4 SV=2;G7NBL7_MACMU Uncharacterized protein (Fragment) OS=Macaca mulatta OX=9544 GN=EGK_05861 PE=4	9	1	1	1	7.2	25.036	41185000
A0A1D5R244	Uncharacterized protein	MYL5	A0A1D5R244;G7MG64;F7FK20	A0A1D5R244_MACMU Uncharacterized protein OS=Macaca mulatta OX=9544 GN=MYL5 PE=4 SV=1;G7MG64_MACMU Myosin regulatory light chain 5 (Fragment) OS=Macaca mulatta OX=9544 GN=EGK_00079 PE=4 SV=1;F7FK20_MACMU Uncharacterized protein OS=Macaca mulatta OX=9544 GN=	3	1	1	1	7.9	14.106	23134000000	13589000000	6670400000	8945400000	9296800000	13874000000	12562000000	14935000000	12957000000
A0A1D5R2A3	Uncharacterized protein	SYNE2	A0A1D5R2A3;G7MY99;A0A1D5R4V3;F6SQE4;F6UG59;H9F5K7;F7G5C8;F7BVA5	A0A1D5R2A3_MACMU Uncharacterized protein OS=Macaca mulatta OX=9544 GN=SYNE2 PE=4 SV=1;G7MY99_MACMU Uncharacterized protein OS=Macaca mulatta OX=9544 GN=EGK_18277 PE=4 SV=1;A0A1D5R4V3_MACMU Uncharacterized protein OS=Macaca mulatta OX=9544 GN=SYNE2 PE=4 SV=	8	3	3	3	0.4	796.34	54051000	15338000	36763000	15900000	88874000	1218300000	18199000	13355000	10208000
H9FAA3	Dihydropyrimidinase-related protein 3 isoform 2 (Fragment)	DPYSL3	H9FAA3;A0A1D5R2B7;I2CY64;I0FHT5;F6SAK8;A0A1D5Q7G9;H9F714;G7MZX4;F7FXK5	H9FAA3_MACMU Dihydropyrimidinase-related protein 3 isoform 2 (Fragment) OS=Macaca mulatta OX=9544 GN=DPYSL3 PE=2 SV=1;A0A1D5R2B7_MACMU Uncharacterized protein OS=Macaca mulatta OX=9544 GN=DPYSL3 PE=4 SV=1;I2CY64_MACMU Dihydropyrimidinase-related protein 3	9	12	8	9	35.6	54.763		5484600	786470000	20075000		13225000	21403000	31678000	53533000
A0A1D5R2G8	Uncharacterized protein	TRA2A	A0A1D5R2G8;H9F1C3;H9H354;G7MLN8;I0FR74;H9H310	A0A1D5R2G8_MACMU Uncharacterized protein OS=Macaca mulatta OX=9544 GN=TRA2A PE=4 SV=1;H9F1C3_MACMU Transformer-2 protein homolog alpha (Fragment) OS=Macaca mulatta OX=9544 GN=TRA2A PE=2 SV=1;H9H354_MACMU Uncharacterized protein OS=Macaca mulatta OX=9544 GN	6	2	1	1	13.4	19.534	10290000				24924000
A0A1D5R2J4	Uncharacterized protein	TPM1	A0A1D5R2J4;F7FYL7;F6RBE9;F7GV56;F7FYJ1;F7ESK4	A0A1D5R2J4_MACMU Uncharacterized protein OS=Macaca mulatta OX=9544 GN=TPM1 PE=3 SV=1;F7FYL7_MACMU Uncharacterized protein OS=Macaca mulatta OX=9544 GN=TPM1 PE=3 SV=2;F6RBE9_MACMU Uncharacterized protein OS=Macaca mulatta OX=9544 GN=TPM1 PE=3 SV=2;F7GV56_MA	6	48	0	5	81.7	32.68	28401000000	28962000000	29809000000	25324000000	27284000000	32226000000	32538000000	37172000000	30588000000
A0A1D5R2J6	Uncharacterized protein		A0A1D5R2J6;F7EUB8;G7MK24;F6R4G2	A0A1D5R2J6_MACMU Uncharacterized protein OS=Macaca mulatta OX=9544 PE=4 SV=1;F7EUB8_MACMU Uncharacterized protein OS=Macaca mulatta OX=9544 GN=PCNP PE=4 SV=2;G7MK24_MACMU Uncharacterized protein OS=Macaca mulatta OX=9544 GN=EGK_11245 PE=4 SV=1;F6R4G2_MACMU	4	1	1	1	18.3	8.7095
G7NPT2	Nuclear pore complex protein Nup93	NUP93	G7NPT2;A0A1D5R2M9;A0A1D5QUG4	G7NPT2_MACMU Nuclear pore complex protein Nup93 OS=Macaca mulatta OX=9544 GN=NUP93 PE=2 SV=1;A0A1D5R2M9_MACMU Nuclear pore complex protein Nup93 OS=Macaca mulatta OX=9544 GN=NUP93 PE=3 SV=1;A0A1D5QUG4_MACMU Nuclear pore complex protein Nup93 OS=Macaca mula	3	5	5	5	10.3	93.508					55539000
A0A1D5R2N3	Ubiquitin carboxyl-terminal hydrolase	UCHL1	A0A1D5R2N3;A0A1D5RBB0;G7MST4;F7H5G4	A0A1D5R2N3_MACMU Ubiquitin carboxyl-terminal hydrolase OS=Macaca mulatta OX=9544 GN=UCHL1 PE=3 SV=1;A0A1D5RBB0_MACMU Ubiquitin carboxyl-terminal hydrolase OS=Macaca mulatta OX=9544 GN=UCHL1 PE=2 SV=1;G7MST4_MACMU Ubiquitin carboxyl-terminal hydrolase OS=Ma	4	4	4	4	27.5	23.116	165760000	121430000	211960000	33881000	49086000	95348000	71677000	164140000	70616000
G7MI26	Uncharacterized protein	EGK_00972	G7MI26;F7C4N5;A0A1D5R2X3;H9F5C9;A0A1D5QEV3;A0A1D5RG41;F7F6X5;A0A1D5QQN2;A0A1D5R9V0	G7MI26_MACMU Uncharacterized protein OS=Macaca mulatta OX=9544 GN=EGK_00972 PE=3 SV=1;F7C4N5_MACMU 60S ribosomal protein L5 OS=Macaca mulatta OX=9544 GN=RPL5 PE=2 SV=2;A0A1D5R2X3_MACMU Uncharacterized protein OS=Macaca mulatta OX=9544 GN=RPL5 PE=3 SV=1;H9F	9	11	11	11	34	34.376	359630000	517720000	784670000	788840000	1357300000	794500000	644010000	349160000	297380000
A0A1D5R354	Uncharacterized protein	MYH3	A0A1D5R354;F7GP56;G7NIS1;A0A1D5QVU6;F6XAV7;F6XAW9;F7G0T2	A0A1D5R354_MACMU Uncharacterized protein OS=Macaca mulatta OX=9544 GN=MYH3 PE=3 SV=1;F7GP56_MACMU Uncharacterized protein OS=Macaca mulatta OX=9544 GN=MYH3 PE=3 SV=2;G7NIS1_MACMU Myosin heavy chain 3 OS=Macaca mulatta OX=9544 GN=EGK_08199 PE=3 SV=1;A0A1D5Q	7	49	3	3	19.4	222.25	7573700000	11512000000	7445200000	8272800000	6075600000	8953800000	8034700000	10461000000	6747200000
I0FV31	Large proline-rich protein BAG6 isoform b	BAG6	I0FV31;H9ESC5;F7CSS1;G7MRI8;A0A1D5R3E6;H9H327;F7CSQ6;Q5TM27;H9H326	I0FV31_MACMU Large proline-rich protein BAG6 isoform b OS=Macaca mulatta OX=9544 GN=BAG6 PE=2 SV=1;H9ESC5_MACMU Large proline-rich protein BAG6 isoform b OS=Macaca mulatta OX=9544 GN=BAT3 PE=2 SV=1;F7CSS1_MACMU Uncharacterized protein OS=Macaca mulatta OX=	9	6	6	6	7.8	118.76	21185000			28500000	26182000
F6SDI5	Uncharacterized protein	RPL23	F6SDI5;G7NH46;A0A1D5R3G7	F6SDI5_MACMU Uncharacterized protein OS=Macaca mulatta OX=9544 GN=RPL23 PE=3 SV=2;G7NH46_MACMU 60S ribosomal protein L17 (Fragment) OS=Macaca mulatta OX=9544 GN=EGK_08442 PE=3 SV=1;A0A1D5R3G7_MACMU 60S ribosomal protein L23 OS=Macaca mulatta OX=9544 GN=RPL	3	2	2	2	30.7	12.084	107220000	193320000	264620000	304080000	407930000	203100000	138280000	113790000	135230000
A0A1D5R3I5	Uncharacterized protein	ARL3	A0A1D5R3I5;G7N112;H9FUD7;A0A1D5RH63	A0A1D5R3I5_MACMU Uncharacterized protein OS=Macaca mulatta OX=9544 GN=ARL3 PE=3 SV=1;G7N112_MACMU Uncharacterized protein (Fragment) OS=Macaca mulatta OX=9544 GN=EGK_20021 PE=3 SV=1;H9FUD7_MACMU ADP-ribosylation factor-like protein 3 OS=Macaca mulatta OX=9	4	2	2	2	20.1	18.357						44341000
A0A1D5R3J7	Uncharacterized protein	NDUFAF5	A0A1D5R3J7;H9YYP6;H9EX71;F7EJJ2;F7EJI0	A0A1D5R3J7_MACMU Uncharacterized protein OS=Macaca mulatta OX=9544 GN=NDUFAF5 PE=4 SV=1;H9YYP6_MACMU Putative methyltransferase C20orf7, mitochondrial isoform 1 OS=Macaca mulatta OX=9544 GN=C20orf7 PE=2 SV=1;H9EX71_MACMU Putative methyltransferase C20orf7,	5	1	1	1	4.5	30.218	13784000	27737000	14207000	22755000	11795000		30545000	37527000	24041000
A0A1D5R3N5	Uncharacterized protein	LOC694417	A0A1D5R3N5;F7CXR4	A0A1D5R3N5_MACMU Uncharacterized protein OS=Macaca mulatta OX=9544 GN=LOC694417 PE=4 SV=1;F7CXR4_MACMU Histone deacetylase complex subunit SAP18 OS=Macaca mulatta OX=9544 GN=SAP18 PE=2 SV=2	2	2	2	2	14.1	17.136		33485000	31594000	29695000	39908000	31372000
A0A1D5R3P8	Peptidyl-prolyl cis-trans isomerase		A0A1D5R3P8;G7MP64	A0A1D5R3P8_MACMU Peptidyl-prolyl cis-trans isomerase OS=Macaca mulatta OX=9544 PE=3 SV=1;G7MP64_MACMU Peptidyl-prolyl cis-trans isomerase OS=Macaca mulatta OX=9544 GN=PPIL1 PE=2 SV=1	2	1	1	1	10.8	17.155		26079000	42465000	39844000	42620000	45002000	30133000
F6V595	Uncharacterized protein	LAMTOR5	F6V595;H9F2E4;A0A1D5R3Q2	F6V595_MACMU Uncharacterized protein OS=Macaca mulatta OX=9544 GN=LAMTOR5 PE=4 SV=2;H9F2E4_MACMU Hepatitis B virus X-interacting protein (Fragment) OS=Macaca mulatta OX=9544 GN=HBXIP PE=2 SV=1;A0A1D5R3Q2_MACMU Uncharacterized protein OS=Macaca mulatta OX=9	3	1	1	1	22.2	9.5279	37266000	51443000	30374000	27875000	35428000		35480000	57768000	31301000
H9FCA8	Histone H4 (Fragment)	HIST1H4K	H9FCA8;A0A1D5R3S0;G7MR23;F7HAP8;G7MR56;H9FCA9;Q6B821	H9FCA8_MACMU Histone H4 (Fragment) OS=Macaca mulatta OX=9544 GN=HIST1H4K PE=2 SV=1;A0A1D5R3S0_MACMU Histone H4 OS=Macaca mulatta OX=9544 GN=LOC106996634 PE=3 SV=1;G7MR23_MACMU Histone H4 OS=Macaca mulatta OX=9544 GN=EGK_14546 PE=3 SV=1;F7HAP8_MACMU Histone	7	9	9	9	67.9	9.1626	21106000000	26581000000	27277000000	24776000000	25587000000	20238000000	27474000000	21663000000	23772000000
A0A1D5R3T7	Uncharacterized protein		A0A1D5R3T7;H9Z5W8;G7MNA7	A0A1D5R3T7_MACMU Uncharacterized protein OS=Macaca mulatta OX=9544 PE=4 SV=1;H9Z5W8_MACMU GTPase IMAP family member 1 OS=Macaca mulatta OX=9544 GN=GIMAP1 PE=2 SV=1;G7MNA7_MACMU Uncharacterized protein OS=Macaca mulatta OX=9544 GN=EGK_14334 PE=4 SV=1	3	1	1	1	6.6	30.658							6790800
H9YW62	NADH dehydrogenase [ubiquinone] iron-sulfur protein 3, mitochondrial	NDUFS3	H9YW62;A0A1D5R3V0;F6ZLX4;A0A1D5RCX8	H9YW62_MACMU NADH dehydrogenase [ubiquinone] iron-sulfur protein 3, mitochondrial OS=Macaca mulatta OX=9544 GN=NDUFS3 PE=2 SV=1;A0A1D5R3V0_MACMU Uncharacterized protein OS=Macaca mulatta OX=9544 GN=NDUFS3 PE=3 SV=1;F6ZLX4_MACMU Uncharacterized protein OS=M	4	18	18	18	68.2	30.229	6050400000	5476200000	3352800000	4813700000	4234500000	2887000000	5552900000	6339300000	6259100000
H9EN05	Calumenin isoform d	CALU	H9EN05;F6ZZ64;F6ZZ73;A0A1D5R3Z1;A0A1D5R5Q3;G7MMB2	H9EN05_MACMU Calumenin isoform d OS=Macaca mulatta OX=9544 GN=CALU PE=2 SV=1;F6ZZ64_MACMU Calumenin isoform c OS=Macaca mulatta OX=9544 GN=CALU PE=2 SV=1;F6ZZ73_MACMU Uncharacterized protein OS=Macaca mulatta OX=9544 GN=CALU PE=4 SV=2;A0A1D5R3Z1_MACMU Unch	6	6	6	6	24.1	37.134	129020000	97340000	182800000	121200000	214340000	103830000	66254000	43652000	49567000
F6PVP0	Uncharacterized protein	ATRAID	F6PVP0;A0A1D5R405;H9YY08;G7N9N2;H9F857;A0A1D5QNQ2	F6PVP0_MACMU Uncharacterized protein OS=Macaca mulatta OX=9544 GN=ATRAID PE=3 SV=2;A0A1D5R405_MACMU Uncharacterized protein OS=Macaca mulatta OX=9544 GN=ATRAID PE=3 SV=1;H9YY08_MACMU CAD protein OS=Macaca mulatta OX=9544 GN=CAD PE=2 SV=1;G7N9N2_MACMU CAD p	6	8	6	6	4.5	236.12			81693000	96254000	150240000		11502000
G7MT99	40S ribosomal protein S20 isoform 2	RPS20	G7MT99;A0A1D5R456;G7MZD7;A0A1D5Q7W9;A0A1D5Q1V4;A0A1D5QJ71;F6SCE0;G7NSQ1;H9EQT7;F7HF18;F6QKX9	G7MT99_MACMU 40S ribosomal protein S20 isoform 2 OS=Macaca mulatta OX=9544 GN=RPS20 PE=2 SV=1;A0A1D5R456_MACMU Uncharacterized protein OS=Macaca mulatta OX=9544 GN=RPS20 PE=3 SV=1;G7MZD7_MACMU Uncharacterized protein (Fragment) OS=Macaca mulatta OX=9544 GN	11	2	2	2	19.3	13.373	193610000	263530000	377960000	402390000	784770000	373830000	529480000	172330000	209580000
A0A1D5R480	Alpha-1,4 glucan phosphorylase	PYGL	A0A1D5R480;F7FLT9;G7MXR4;F7ASP1;A0A1D5Q293;H9F9B4	A0A1D5R480_MACMU Alpha-1,4 glucan phosphorylase OS=Macaca mulatta OX=9544 GN=PYGL PE=3 SV=1;F7FLT9_MACMU Alpha-1,4 glucan phosphorylase OS=Macaca mulatta OX=9544 GN=PYGL PE=3 SV=2;G7MXR4_MACMU Alpha-1,4 glucan phosphorylase OS=Macaca mulatta OX=9544 GN=EGK	6	18	6	9	25.1	93.105			223170000		52220000		63849000	22368000
I0FRI9	NADH dehydrogenase [ubiquinone] iron-sulfur protein 7, mitochondrial	NDUFS7	I0FRI9;H9EXK3;G7NL49;F6VFS0;A0A1D5R4A9;A0A1D5R4L4;A0A1D5Q3F3;F6VFQ0	I0FRI9_MACMU NADH dehydrogenase [ubiquinone] iron-sulfur protein 7, mitochondrial OS=Macaca mulatta OX=9544 GN=NDUFS7 PE=2 SV=1;H9EXK3_MACMU NADH dehydrogenase [ubiquinone] iron-sulfur protein 7, mitochondrial OS=Macaca mulatta OX=9544 GN=NDUFS7 PE=2 SV=1;	8	6	6	6	31.5	23.398	1726600000	1880100000	1269400000	1457500000	1195400000	890650000	1594600000	1962700000	1729600000
F7FHJ3	AP complex subunit beta	AP1B1	F7FHJ3;A0A1D5R4C7;F7FHJ8;H9ETX7;H9FQM5;F7FHI8;G7N3J1;I0FGI0;I0FPK3	F7FHJ3_MACMU AP complex subunit beta OS=Macaca mulatta OX=9544 GN=AP1B1 PE=3 SV=2;A0A1D5R4C7_MACMU AP complex subunit beta OS=Macaca mulatta OX=9544 GN=AP1B1 PE=3 SV=1;F7FHJ8_MACMU AP complex subunit beta OS=Macaca mulatta OX=9544 GN=AP1B1 PE=3 SV=2;H9ETX7	9	7	3	3	13	99.374	25946000		67372000	38005000	63253000	32077000	43514000	22215000	35347000
A0A1D5R4H8	Uncharacterized protein	DMAC2L	A0A1D5R4H8;A0A1D5QUE3;F7H9C9	A0A1D5R4H8_MACMU Uncharacterized protein OS=Macaca mulatta OX=9544 GN=DMAC2L PE=4 SV=1	3	3	3	3	18.9	27.426	130020000	163730000	85330000	110540000	158980000	131530000	146050000	124930000	159580000
H9FHL4	Phosphoribosylformylglycinamidine synthase (Fragment)	PFAS	H9FHL4;A0A1D5R4I9;G7NIP2;F7FV75	H9FHL4_MACMU Phosphoribosylformylglycinamidine synthase (Fragment) OS=Macaca mulatta OX=9544 GN=PFAS PE=2 SV=1;A0A1D5R4I9_MACMU Uncharacterized protein OS=Macaca mulatta OX=9544 GN=PFAS PE=3 SV=1;G7NIP2_MACMU Phosphoribosylformylglycinamidine synthase OS=M	4	1	1	1	4.1	50.116			19940000		35937000
H9EP53	Eukaryotic translation initiation factor 1A, X-chromosomal	EIF1AY	H9EP53;G7NSD2;B8YE01;A0A1D5R4P1;F7HJF7;A0A1D5R1P3;A0A1D5RC04;A0A1D5Q8K6	H9EP53_MACMU Eukaryotic translation initiation factor 1A, X-chromosomal OS=Macaca mulatta OX=9544 GN=EIF1AY PE=2 SV=1;G7NSD2_MACMU Eukaryotic translation initiation factor 1A, X-chromosomal (Fragment) OS=Macaca mulatta OX=9544 GN=EGK_20317 PE=3 SV=1;B8YE01	8	3	3	3	22.9	16.46			46161000		85300000
G7NER3	Actin-related protein 2/3 complex subunit 5 (Fragment)	EGK_07883	G7NER3;A0A1D5R4Q7;H9G0A9	G7NER3_MACMU Actin-related protein 2/3 complex subunit 5 (Fragment) OS=Macaca mulatta OX=9544 GN=EGK_07883 PE=3 SV=1;A0A1D5R4Q7_MACMU Actin-related protein 2/3 complex subunit 5 OS=Macaca mulatta OX=9544 GN=ARPC5L PE=3 SV=1;H9G0A9_MACMU Actin-related prote	3	2	2	2	24.3	11.365	23641000	38416000	56474000	35615000	57238000	30982000	37277000	35076000	34397000
A0A1D5R4U5	Uncharacterized protein		A0A1D5R4U5;H9Z5D2;G7MPR6;A0A1D5QN05;A0A1D5RHQ8	A0A1D5R4U5_MACMU Uncharacterized protein OS=Macaca mulatta OX=9544 PE=4 SV=1;H9Z5D2_MACMU Cytochrome c oxidase subunit 7A2, mitochondrial OS=Macaca mulatta OX=9544 GN=COX7A2 PE=2 SV=1;G7MPR6_MACMU Uncharacterized protein OS=Macaca mulatta OX=9544 GN=EGK_15	5	2	2	2	23.5	11.083	436930000	406230000	328550000	421810000	515470000	720110000	476150000	730190000	822340000
Q95JD7	Adiponectin	APM1	Q95JD7;F7HQ03;A0A3B0J6H9;A0A1D5R549	Q95JD7_MACMU Adiponectin OS=Macaca mulatta OX=9544 GN=APM1 PE=2 SV=1;F7HQ03_MACMU Uncharacterized protein OS=Macaca mulatta OX=9544 GN=ADIPOQ PE=4 SV=2;A0A3B0J6H9_MACMU Adiponectin D OS=Macaca mulatta OX=9544 GN=ADID PE=4 SV=1;A0A1D5R549_MACMU Uncharacteri	4	2	2	2	12.3	26.264	287030000	639710000	189100000	405890000	422770000	430480000	337830000	480110000	500370000
A0A1D5R573	Coronin	CORO1A	A0A1D5R573	A0A1D5R573_MACMU Coronin OS=Macaca mulatta OX=9544 GN=CORO1A PE=3 SV=1	1	1	1	1	1.8	42.667	34943000	46716000	35261000	52785000	54854000	73589000	74363000		54784000
A0A1D5R578	Uncharacterized protein	COL6A3	A0A1D5R578;F6S395;A0A1D5R2A6;F7AG89	A0A1D5R578_MACMU Uncharacterized protein OS=Macaca mulatta OX=9544 GN=COL6A3 PE=4 SV=1;F6S395_MACMU Uncharacterized protein OS=Macaca mulatta OX=9544 GN=COL6A3 PE=4 SV=2;A0A1D5R2A6_MACMU Uncharacterized protein OS=Macaca mulatta OX=9544 GN=COL6A3 PE=4 SV=1	4	90	0	2	43.2	274.03	313510000	631880000	441990000	129500000	175670000	230000000	451240000	618520000	577470000
A0A1D5R5C8	Uncharacterized protein	HARS2	A0A1D5R5C8;I2CY73;H9EW88;G7MUZ3;A0A1D5R0V9;A0A1D5QDM5	A0A1D5R5C8_MACMU Uncharacterized protein OS=Macaca mulatta OX=9544 GN=HARS2 PE=4 SV=1;I2CY73_MACMU Putative histidyl-tRNA synthetase, mitochondrial OS=Macaca mulatta OX=9544 GN=HARS2 PE=2 SV=1;H9EW88_MACMU Putative histidyl-tRNA synthetase, mitochondrial O	6	4	3	4	9.8	54.094	30392000		25259000	53114000	30269000	41502000	28112000
A0A1D5R5C9	Uncharacterized protein	NTN4	A0A1D5R5C9;F7A3Z5;H9F758;G7N801;F7A403	A0A1D5R5C9_MACMU Uncharacterized protein OS=Macaca mulatta OX=9544 GN=NTN4 PE=4 SV=1;F7A3Z5_MACMU Uncharacterized protein OS=Macaca mulatta OX=9544 GN=NTN4 PE=4 SV=1;H9F758_MACMU Netrin-4 (Fragment) OS=Macaca mulatta OX=9544 GN=NTN4 PE=2 SV=1;G7N801_MACMU	5	1	1	1	2.5	66.214
A0A1D5RI76	ATP synthase subunit alpha		A0A1D5RI76;A0A1D5R5H0;A0A1D5QX75	A0A1D5RI76_MACMU ATP synthase subunit alpha OS=Macaca mulatta OX=9544 PE=3 SV=1;A0A1D5R5H0_MACMU ATP synthase subunit alpha OS=Macaca mulatta OX=9544 PE=3 SV=1;A0A1D5QX75_MACMU Uncharacterized protein OS=Macaca mulatta OX=9544 PE=4 SV=1	3	9	1	1	15.6	46.006		8567600	34929000	30779000	45410000	21391000
I0FWH8	Glyoxylate reductase/hydroxypyruvate reductase	GRHPR	I0FWH8;H9G201;A0A1D5R5H2	I0FWH8_MACMU Glyoxylate reductase/hydroxypyruvate reductase OS=Macaca mulatta OX=9544 GN=GRHPR PE=2 SV=1;H9G201_MACMU Glyoxylate reductase/hydroxypyruvate reductase OS=Macaca mulatta OX=9544 GN=GRHPR PE=2 SV=1;A0A1D5R5H2_MACMU Uncharacterized protein OS=Ma	3	4	4	4	13.7	35.574	163420000	179520000	57148000	151660000	64047000	110610000	103570000	135350000	58042000
A0A1D5R5K8	Uncharacterized protein		A0A1D5R5K8;H9G0R4;G7NB31	A0A1D5R5K8_MACMU Uncharacterized protein OS=Macaca mulatta OX=9544 PE=4 SV=1;H9G0R4_MACMU MKI67 FHA domain-interacting nucleolar phosphoprotein OS=Macaca mulatta OX=9544 GN=MKI67IP PE=2 SV=1;G7NB31_MACMU MKI67 FHA domain-interacting nucleolar phosphoprotei	3	1	1	1	5.5	29.107			8824100	13855000	25265000
F7EUM0	Ras-related protein Rab-18	RAB18	F7EUM0;A0A1D5R5M1;A0A1D5QMG4;A0A1D5R314;A0A1D5RB55;A0A1D5RKX0	F7EUM0_MACMU Ras-related protein Rab-18 OS=Macaca mulatta OX=9544 GN=RAB18 PE=2 SV=1;A0A1D5R5M1_MACMU Uncharacterized protein OS=Macaca mulatta OX=9544 GN=RAB18 PE=4 SV=1;A0A1D5QMG4_MACMU Uncharacterized protein OS=Macaca mulatta OX=9544 GN=RAB18 PE=4 SV=1	6	5	5	5	29.1	22.977	105290000	63157000	78492000	98963000	72084000	87274000	87279000	122110000	117650000
G7N3Q7	Uncharacterized protein	EGK_02993	G7N3Q7;F7B7D7;A0A1D5R5P8;A0A1D5R424;H9YUC5;H9EU84;F7B708;A0A1D5QDK8;A0A1D5QCJ2;A0A1D5QQ55	G7N3Q7_MACMU Uncharacterized protein OS=Macaca mulatta OX=9544 GN=EGK_02993 PE=3 SV=1;F7B7D7_MACMU Uncharacterized protein OS=Macaca mulatta OX=9544 GN=MYH9 PE=3 SV=2;A0A1D5R5P8_MACMU Uncharacterized protein OS=Macaca mulatta OX=9544 GN=MYH9 PE=3 SV=1;A0A1	10	83	29	29	47.8	226.52	876760000	1055900000	1678200000	1326600000	1846300000	1155500000	1663400000	732180000	827730000
G7NA89	Annexin (Fragment)	EGK_05407	G7NA89;F6TG27;I2CVQ2;H9FTN8;A0A1D5R5Q6	G7NA89_MACMU Annexin (Fragment) OS=Macaca mulatta OX=9544 GN=EGK_05407 PE=3 SV=1;F6TG27_MACMU Annexin OS=Macaca mulatta OX=9544 GN=ANXA4 PE=3 SV=2;I2CVQ2_MACMU Annexin OS=Macaca mulatta OX=9544 GN=ANXA4 PE=2 SV=1;H9FTN8_MACMU Annexin OS=Macaca mulatta OX=9	5	6	6	6	20.9	35.891		79405000	234310000	71787000	86710000	66733000	113510000	56637000	81066000
F6PJT4	Uncharacterized protein	CAMK2B	F6PJT4;F6PJU5;F6PJY7;F6PKZ8;F6PKV0;F6PKW8;I2CT74;I2CYW4;A0A1D5R5T9;F6PJW4	F6PJT4_MACMU Uncharacterized protein OS=Macaca mulatta OX=9544 GN=CAMK2B PE=3 SV=2;F6PJU5_MACMU Uncharacterized protein OS=Macaca mulatta OX=9544 GN=CAMK2B PE=3 SV=2;F6PJY7_MACMU Uncharacterized protein OS=Macaca mulatta OX=9544 GN=CAMK2B PE=3 SV=2;F6PKZ8_	10	10	1	1	27.2	50.955		36993000		36362000	32605000	41695000			27257000
A0A1D5R5Z4	T-complex protein 1 subunit delta	CCT4	A0A1D5R5Z4;H9FNT5;G7NA55;F7ENV5;F6S025	A0A1D5R5Z4_MACMU T-complex protein 1 subunit delta OS=Macaca mulatta OX=9544 GN=CCT4 PE=3 SV=1;H9FNT5_MACMU T-complex protein 1 subunit delta OS=Macaca mulatta OX=9544 GN=CCT4 PE=2 SV=1;G7NA55_MACMU T-complex protein 1 subunit delta (Fragment) OS=Macaca mu	5	19	19	19	43.5	57.04	566810000	595870000	1192400000	1145600000	1706100000	839270000	717950000	435310000	399800000
F7CS38	Uncharacterized protein	BLM	F7CS38;H9ZC96;G7MVY7;A0A1D5R692;A0A1D5R519;H9F6Y6	F7CS38_MACMU Uncharacterized protein OS=Macaca mulatta OX=9544 GN=BLM PE=4 SV=2;H9ZC96_MACMU Bloom syndrome protein OS=Macaca mulatta OX=9544 GN=BLM PE=2 SV=1;G7MVY7_MACMU Bloom syndrome protein OS=Macaca mulatta OX=9544 GN=EGK_17837 PE=4 SV=1;A0A1D5R692_M	6	2	2	2	1.3	144.37				118220000	164580000				63948000
A0A1D5R698	Uncharacterized protein	CHORDC1	A0A1D5R698;G7NBF7;A0A1D5QE83;A0A1D5QMD6;A0A1D5Q824;A0A1D5R0B6	A0A1D5R698_MACMU Uncharacterized protein OS=Macaca mulatta OX=9544 GN=CHORDC1 PE=4 SV=1;G7NBF7_MACMU Cysteine and histidine-rich domain-containing protein 1 isoform a OS=Macaca mulatta OX=9544 GN=CHORDC1 PE=2 SV=1;A0A1D5QE83_MACMU Uncharacterized protein O	6	4	4	4	17.9	35.384		18959000	62412000	79272000	104730000	34856000
A0A1D5R6B9	Uncharacterized protein	NAGK	A0A1D5R6B9;F6WHT9;G7NAA8;A0A1D5QVI5	A0A1D5R6B9_MACMU Uncharacterized protein OS=Macaca mulatta OX=9544 GN=NAGK PE=4 SV=1;F6WHT9_MACMU Uncharacterized protein OS=Macaca mulatta OX=9544 GN=NAGK PE=4 SV=2;G7NAA8_MACMU Uncharacterized protein OS=Macaca mulatta OX=9544 GN=EGK_05429 PE=4 SV=1;A0A1	4	2	2	2	11.3	31.923		33176000				12359000	16569000		16564000
F7DLS4	Uncharacterized protein	PDXK	F7DLS4;A0A1D5R6F9;H9EWM2;F7FIP5	F7DLS4_MACMU Uncharacterized protein OS=Macaca mulatta OX=9544 GN=PDXK PE=4 SV=2;A0A1D5R6F9_MACMU Uncharacterized protein OS=Macaca mulatta OX=9544 GN=PDXK PE=4 SV=1;H9EWM2_MACMU Pyridoxal kinase OS=Macaca mulatta OX=9544 GN=PDXK PE=2 SV=1;F7FIP5_MACMU Unc	4	4	4	4	21.6	30.099	78897000	73528000	41689000	49054000		52702000	66883000	59618000	34751000
F7GSV4	Uncharacterized protein	DDAH1	F7GSV4;A0A1D5R6G9;G7MHT6;F7HB67	F7GSV4_MACMU Uncharacterized protein OS=Macaca mulatta OX=9544 GN=DDAH1 PE=4 SV=1;A0A1D5R6G9_MACMU Uncharacterized protein OS=Macaca mulatta OX=9544 GN=DDAH1 PE=4 SV=1;G7MHT6_MACMU Uncharacterized protein (Fragment) OS=Macaca mulatta OX=9544 GN=EGK_00924 P	4	1	1	1	5.4	20.535			23203000		12476000	11301000	19442000	25709000
F7HJ57	Uncharacterized protein	CHP1	F7HJ57;A0A1D5R6I4	F7HJ57_MACMU Uncharacterized protein OS=Macaca mulatta OX=9544 GN=CHP1 PE=4 SV=2;A0A1D5R6I4_MACMU Calcium-binding protein CHP OS=Macaca mulatta OX=9544 GN=CHP1 PE=2 SV=1	2	2	2	2	18.2	17.987	25898000	37483000	26186000	42794000	48757000	23674000	55262000		44662000
A0A1D5R6K9	NADH dehydrogenase [ubiquinone] 1 alpha subcomplex subunit 12	NDUFA12	A0A1D5R6K9;F7A0R2;A0A1D5QSE8	A0A1D5R6K9_MACMU NADH dehydrogenase [ubiquinone] 1 alpha subcomplex subunit 12 OS=Macaca mulatta OX=9544 GN=NDUFA12 PE=2 SV=1	3	12	12	12	84.1	17.101	4686500000	4584200000	2366700000	3183800000	2932500000	2194700000	3945700000	4270100000	4938900000
F6Z802	MICOS complex subunit	APOOL	F6Z802;F6UKF5;I0FI53;H9FQ49;A0A1D5R6P0;G7NSD6	F6Z802_MACMU MICOS complex subunit OS=Macaca mulatta OX=9544 GN=APOOL PE=4 SV=2;F6UKF5_MACMU MICOS complex subunit OS=Macaca mulatta OX=9544 GN=APOOL PE=4 SV=2;I0FI53_MACMU MICOS complex subunit OS=Macaca mulatta OX=9544 GN=APOOL PE=2 SV=1;H9FQ49_MACMU MIC	6	8	8	8	44.9	28.966	775590000	571530000	465930000	578490000	470130000	414770000	798620000	640300000	672200000
A0A1D5RFP0	Uncharacterized protein	WDR77	A0A1D5RFP0;A0A1D5R6U3;F7EL45	A0A1D5RFP0_MACMU Uncharacterized protein OS=Macaca mulatta OX=9544 GN=WDR77 PE=4 SV=1;A0A1D5R6U3_MACMU Uncharacterized protein OS=Macaca mulatta OX=9544 GN=WDR77 PE=4 SV=1;F7EL45_MACMU Methylosome protein 50 OS=Macaca mulatta OX=9544 GN=WDR77 PE=2 SV=1	3	2	2	2	7.7	30.822	9449100	14705000	17561000	19749000	33225000	16995000	29088000
H9ERW7	Sarcospan isoform 1	SSPN	H9ERW7;A0A1D5R6U4;G7N6K7;F7ADH7	H9ERW7_MACMU Sarcospan isoform 1 OS=Macaca mulatta OX=9544 GN=SSPN PE=2 SV=1;A0A1D5R6U4_MACMU Sarcospan isoform 1 OS=Macaca mulatta OX=9544 GN=SSPN PE=2 SV=1;G7N6K7_MACMU K-ras oncogene-associated protein OS=Macaca mulatta OX=9544 GN=EGK_03475 PE=4 SV=1	4	3	3	3	15.6	26.703	100220000	206440000	61207000	124100000	73123000	146220000	145710000	108720000	203950000
F6YGF0	Uncharacterized protein	SPAG9	F6YGF0;F6YH05;G7NHN2;H9FCI0;H9FCH9;I2CUA3;F6YGJ3;F6YGG7;H9FCI1;A0A1D5R6U9;B2NJ31	F6YGF0_MACMU Uncharacterized protein OS=Macaca mulatta OX=9544 GN=SPAG9 PE=4 SV=2;F6YH05_MACMU Uncharacterized protein OS=Macaca mulatta OX=9544 GN=SPAG9 PE=4 SV=2;G7NHN2_MACMU Uncharacterized protein (Fragment) OS=Macaca mulatta OX=9544 GN=EGK_08535 PE=4	11	2	2	2	2.5	128.56		68137000		69771000	62264000	57945000	110470000	95913000	89321000
Q3LRT1	2,3-cyclic-nucleotide 3-phosphodiesterase	CNP	Q3LRT1;H9Z590;G7NIK0;A0A1D5R6V1	Q3LRT1_MACMU 2,3-cyclic-nucleotide 3-phosphodiesterase OS=Macaca mulatta OX=9544 GN=CNP PE=2 SV=1;H9Z590_MACMU 2,3-cyclic-nucleotide 3-phosphodiesterase OS=Macaca mulatta OX=9544 GN=CNP PE=2 SV=1;G7NIK0_MACMU 2,3-cyclic-nucleotide 3-phosphodiester	4	2	2	2	7.4	47.538	21150000	9531700
H9FPI2	Chromobox protein homolog 3	CBX3	H9FPI2;F7GZC5;A0A1D5R706;A0A1D5RB47;F6QEX5;I0FNR4	H9FPI2_MACMU Chromobox protein homolog 3 OS=Macaca mulatta OX=9544 GN=CBX3 PE=2 SV=1;F7GZC5_MACMU Uncharacterized protein OS=Macaca mulatta OX=9544 GN=LOC695847 PE=4 SV=1;A0A1D5R706_MACMU Uncharacterized protein OS=Macaca mulatta OX=9544 GN=CBX3 PE=4 SV=1	6	3	2	3	23	20.811	50721000	75810000	106550000	90185000	178810000	109500000	30132000	51731000	59060000
A0A1D5R7C9	Uncharacterized protein	CHTOP	A0A1D5R7C9;F6VBS9;F7HGD8;I2CTD4;H9FSR9	A0A1D5R7C9_MACMU Uncharacterized protein OS=Macaca mulatta OX=9544 GN=CHTOP PE=4 SV=1;F6VBS9_MACMU Uncharacterized protein OS=Macaca mulatta OX=9544 GN=CHTOP PE=4 SV=2;F7HGD8_MACMU Uncharacterized protein OS=Macaca mulatta OX=9544 GN=CHTOP PE=4 SV=2;I2CTD4	5	1	1	1	17.1	8.5199
F7D5Z8	Uncharacterized protein	SVIL	F7D5Z8;A0A1D5R7D9;F7D157;A0A1D5RBR1;F7D0W1;I2CVF2;I0FUK4;H9FGD2	F7D5Z8_MACMU Uncharacterized protein OS=Macaca mulatta OX=9544 GN=SVIL PE=4 SV=2;A0A1D5R7D9_MACMU Uncharacterized protein OS=Macaca mulatta OX=9544 GN=SVIL PE=4 SV=1;F7D157_MACMU Uncharacterized protein OS=Macaca mulatta OX=9544 GN=SVIL PE=4 SV=2;A0A1D5RBR	8	16	16	16	10.3	241.66	130590000	87228000	215620000	30514000	49573000	64894000	208780000	155440000	167870000
H9FNK5	Ribonuclease UK114	HRSP12	H9FNK5;A0A1D5R7M5	H9FNK5_MACMU Ribonuclease UK114 OS=Macaca mulatta OX=9544 GN=HRSP12 PE=2 SV=1;A0A1D5R7M5_MACMU Uncharacterized protein OS=Macaca mulatta OX=9544 GN=LOC698724 PE=4 SV=1	2	1	1	1	11.7	14.479
G7MZN0	Inositol-1-monophosphatase	EGK_19078	G7MZN0;F7H7A7;A0A1D5R7P5;A0A1D5Q2H0;A0A1D5QQY5;A0A1D5QSI9	G7MZN0_MACMU Inositol-1-monophosphatase OS=Macaca mulatta OX=9544 GN=EGK_19078 PE=3 SV=1;F7H7A7_MACMU Inositol-1-monophosphatase OS=Macaca mulatta OX=9544 GN=IMPA1 PE=3 SV=1;A0A1D5R7P5_MACMU Inositol-1-monophosphatase OS=Macaca mulatta OX=9544 GN=IMPA1 PE=	6	7	7	7	26.4	30.256	181580000	178300000	205960000	175690000	171400000	100960000	151140000	208790000	120780000
F7HHL5	Uncharacterized protein	CLPX	F7HHL5;A0A1D5R7Q3;A0A1D5RD00	F7HHL5_MACMU Uncharacterized protein OS=Macaca mulatta OX=9544 GN=CLPX PE=4 SV=2;A0A1D5R7Q3_MACMU ATP-dependent Clp protease ATP-binding subunit clpX-like, mitochondrial OS=Macaca mulatta OX=9544 GN=CLPX PE=2 SV=1;A0A1D5RD00_MACMU Uncharacterized protein O	3	4	4	4	8.4	67.298	14274000	21279000	13401000	17253000	23193000
H9F6I2	Dihydrolipoamide acetyltransferase component of pyruvate dehydrogenase complex (Fragment)	DBT	H9F6I2;A0A1D5R7T4;F7C9Y3	H9F6I2_MACMU Dihydrolipoamide acetyltransferase component of pyruvate dehydrogenase complex (Fragment) OS=Macaca mulatta OX=9544 GN=DBT PE=2 SV=1;A0A1D5R7T4_MACMU Dihydrolipoamide acetyltransferase component of pyruvate dehydrogenase complex OS=Macaca mula	3	9	9	9	21.2	53.335	360610000	402410000	338510000	373580000	335700000	279060000	406300000	329880000	553300000
A0A1D5R7T7	Uncharacterized protein	HNRNPR	A0A1D5R7T7;H9EPF9;H9YUC9;A0A1D5RFR5;A0A1D5QJA1;F7GDH1;H9EPF8;A0A1D5QYL6	A0A1D5R7T7_MACMU Uncharacterized protein OS=Macaca mulatta OX=9544 GN=HNRNPR PE=4 SV=1;H9EPF9_MACMU Heterogeneous nuclear ribonucleoprotein R isoform 2 OS=Macaca mulatta OX=9544 GN=HNRNPR PE=2 SV=1;H9YUC9_MACMU Heterogeneous nuclear ribonucleoprotein R iso	8	9	6	6	19.5	68.3	77484000	136890000	151470000	165270000	267960000	193700000	108820000	74807000	93029000
F7CLM6	Amyloid-beta A4 protein	APP	F7CLM6;I0FGN2;F7FJ79;F7ELT1;F7CLL9;F7ELT5;I0FGN3;A0A1D5R7X6;I0FRG1;G7MNB1	F7CLM6_MACMU Amyloid-beta A4 protein OS=Macaca mulatta OX=9544 GN=APP PE=4 SV=2;I0FGN2_MACMU Amyloid beta A4 protein isoform c OS=Macaca mulatta OX=9544 GN=APP PE=2 SV=1;F7FJ79_MACMU Amyloid-beta A4 protein OS=Macaca mulatta OX=9544 GN=APP PE=4 SV=2;F7ELT1	10	1	1	1	1.8	76.759			13714000				28981000
A0A1D5R7Y4	Uncharacterized protein	EIF1	A0A1D5R7Y4;F7D2W5;F6U3G9;H9ESZ8;A0A1D5R466	A0A1D5R7Y4_MACMU Uncharacterized protein OS=Macaca mulatta OX=9544 GN=EIF1 PE=4 SV=1;F7D2W5_MACMU Eukaryotic translation initiation factor 1 OS=Macaca mulatta OX=9544 GN=LOC718407 PE=2 SV=1;F6U3G9_MACMU Uncharacterized protein OS=Macaca mulatta OX=9544 GN=	5	4	4	4	67.6	11.77	62025000	78949000	54877000	61456000	55466000	49585000	74912000	66862000
F7F187	NADH-cytochrome b5 reductase	CYB5R1	F7F187;A0A1D5R848;A0A1D5QRP5	F7F187_MACMU NADH-cytochrome b5 reductase OS=Macaca mulatta OX=9544 GN=CYB5R1 PE=3 SV=2;A0A1D5R848_MACMU NADH-cytochrome b5 reductase OS=Macaca mulatta OX=9544 GN=CYB5R1 PE=2 SV=1;A0A1D5QRP5_MACMU NADH-cytochrome b5 reductase OS=Macaca mulatta OX=9544 GN=C	3	7	7	7	23.6	34.186	276090000	195380000	181240000	173890000	257410000	308640000	267240000	337600000	472770000
A0A1D5R862	Eukaryotic translation initiation factor 6	EIF6	A0A1D5R862;G7N4Z7;H9H3Z6	A0A1D5R862_MACMU Eukaryotic translation initiation factor 6 OS=Macaca mulatta OX=9544 GN=EIF6 PE=3 SV=1;G7N4Z7_MACMU Eukaryotic translation initiation factor 6 OS=Macaca mulatta OX=9544 GN=EIF6 PE=2 SV=1	3	3	3	3	19.9	22.943	25041000	18423000	93379000	85395000	266440000	78687000	57192000	18834000
G7MXF0	Uncharacterized protein	EGK_18094	G7MXF0;A0A1D5R8A7;F7EXH9;H9EVX6	G7MXF0_MACMU Uncharacterized protein OS=Macaca mulatta OX=9544 GN=EGK_18094 PE=3 SV=1;A0A1D5R8A7_MACMU Uncharacterized protein OS=Macaca mulatta OX=9544 GN=NUBPL PE=3 SV=1;F7EXH9_MACMU Uncharacterized protein OS=Macaca mulatta OX=9544 GN=NUBPL PE=3 SV=2;H9	4	4	4	4	18.2	34.561	35131000	66640000	46681000		54160000	54695000	61417000	53580000	41848000
G7NKS0	Ferrochelatase (Fragment)	EGK_09712	G7NKS0;A0A1D5R8B8;H9ERE1;F6ZKY9;A0A1D5Q3T5	G7NKS0_MACMU Ferrochelatase (Fragment) OS=Macaca mulatta OX=9544 GN=EGK_09712 PE=3 SV=1;A0A1D5R8B8_MACMU Ferrochelatase OS=Macaca mulatta OX=9544 GN=FECH PE=3 SV=1;H9ERE1_MACMU Ferrochelatase OS=Macaca mulatta OX=9544 GN=FECH PE=2 SV=1;F6ZKY9_MACMU Ferroch	5	8	8	8	27.3	46.31	211630000	165920000	173370000	316980000	229160000	253350000	351960000	247870000	384650000
H9F395	NADH dehydrogenase [ubiquinone] 1 beta subcomplex subunit 11, mitochondrial isoform 2 (Fragment)	NDUFB11	H9F395;I2CYE7;A0A1D5R8D1;G7NT36;A0A1D5RCH1	H9F395_MACMU NADH dehydrogenase [ubiquinone] 1 beta subcomplex subunit 11, mitochondrial isoform 2 (Fragment) OS=Macaca mulatta OX=9544 GN=NDUFB11 PE=2 SV=1;I2CYE7_MACMU NADH dehydrogenase [ubiquinone] 1 beta subcomplex subunit 11, mitochondrial isoform 2	5	4	4	4	46.3	16.861	1302400000	1430500000	837560000	1136700000	761660000	747850000	918890000	1211800000	1055600000
A0A1D5R8E2	Ras-related protein Rab-14	RAB14	A0A1D5R8E2;A0A1D5QIH5	A0A1D5R8E2_MACMU Ras-related protein Rab-14 OS=Macaca mulatta OX=9544 GN=RAB14 PE=2 SV=1;A0A1D5QIH5_MACMU Uncharacterized protein OS=Macaca mulatta OX=9544 GN=RAB14 PE=4 SV=1	2	9	9	9	61.4	23.897	339260000	286510000	367510000	245200000	345070000	327410000	343920000	265040000	262290000
F6RK27	Uncharacterized protein	TNXB	F6RK27;A0A1D5R8K4;A0A1D5Q3Q9;H9F3J9;H9FDL9;H9FFG0;H9FEP4;H9FEV4;H9FEL2	F6RK27_MACMU Uncharacterized protein OS=Macaca mulatta OX=9544 GN=TNXB PE=4 SV=2;A0A1D5R8K4_MACMU Uncharacterized protein OS=Macaca mulatta OX=9544 GN=TNXB PE=4 SV=1;A0A1D5Q3Q9_MACMU Uncharacterized protein OS=Macaca mulatta OX=9544 GN=TNXB PE=4 SV=1	9	18	13	18	8.9	434.83	128220000	509540000	201810000	187010000	71762000	68931000	49792000	40289000	128100000
A0A1D5R8L3	1,4-alpha-glucan-branching enzyme	GBE1	A0A1D5R8L3;F7C130	A0A1D5R8L3_MACMU 1,4-alpha-glucan-branching enzyme OS=Macaca mulatta OX=9544 GN=GBE1 PE=2 SV=1;F7C130_MACMU Uncharacterized protein OS=Macaca mulatta OX=9544 GN=GBE1 PE=4 SV=2	2	10	10	10	16.8	80.256	294590000	347490000	324800000	267680000	302370000	429350000	352260000	470170000	290670000
A0A1D5R8L6	Uncharacterized protein	SAE1	A0A1D5R8L6;A0A1D5RHT7;F6YMX6;H9FND3;G7NN21	A0A1D5R8L6_MACMU Uncharacterized protein OS=Macaca mulatta OX=9544 GN=SAE1 PE=4 SV=1;A0A1D5RHT7_MACMU Uncharacterized protein OS=Macaca mulatta OX=9544 GN=SAE1 PE=4 SV=1;F6YMX6_MACMU Uncharacterized protein OS=Macaca mulatta OX=9544 GN=SAE1 PE=4 SV=2;H9FND	5	2	2	2	8.3	29.843				15024000	6388200		19324000
F6S0P0	Uncharacterized protein	TXNL1	F6S0P0;I0FIJ3;A0A1D5R8L9;A0A1D5RI09;A0A1D5QZX0	F6S0P0_MACMU Uncharacterized protein OS=Macaca mulatta OX=9544 GN=TXNL1 PE=4 SV=2;I0FIJ3_MACMU Thioredoxin-like protein 1 OS=Macaca mulatta OX=9544 GN=TXNL1 PE=2 SV=1;A0A1D5R8L9_MACMU Uncharacterized protein OS=Macaca mulatta OX=9544 GN=TXNL1 PE=4 SV=1;A0A	5	8	8	8	40.8	32.067	148990000	143610000	156810000	187270000	265710000	154440000	160510000	105950000	147100000
A0A1D5R8N7	Fermitin family member 2	FERMT2	A0A1D5R8N7;F6R7Y6;G7N2X9	A0A1D5R8N7_MACMU Fermitin family member 2 OS=Macaca mulatta OX=9544 GN=FERMT2 PE=4 SV=1	3	17	2	2	35.9	67.954	34142000	49377000		30006000	28018000	29829000	70805000	83232000	38149000
H9F6K1	Dihydroorotate dehydrogenase (quinone), mitochondrial (Fragment)	DHODH	H9F6K1;F7FAJ8;I0FPN7;H9Z5X8;A0A1D5R8P4;G7NQN6	H9F6K1_MACMU Dihydroorotate dehydrogenase (quinone), mitochondrial (Fragment) OS=Macaca mulatta OX=9544 GN=DHODH PE=2 SV=1;F7FAJ8_MACMU Dihydroorotate dehydrogenase (quinone), mitochondrial OS=Macaca mulatta OX=9544 GN=DHODH PE=3 SV=2;I0FPN7_MACMU Dihydroo	6	3	3	3	10.7	42.418		15469000	14792000	20083000					27749000
A0A1D5R8W0	Uncharacterized protein	SYNGR2	A0A1D5R8W0;F7EHS8;H9F4P5	A0A1D5R8W0_MACMU Uncharacterized protein OS=Macaca mulatta OX=9544 GN=SYNGR2 PE=4 SV=1;F7EHS8_MACMU Synaptogyrin OS=Macaca mulatta OX=9544 GN=SYNGR2 PE=2 SV=1;H9F4P5_MACMU Synaptogyrin-2 (Fragment) OS=Macaca mulatta OX=9544 GN=SYNGR2 PE=2 SV=1	3	3	3	3	42.4	6.9379	30635000	36850000	21402000	21840000	33520000	37557000	61269000	41687000	28237000
A0A1D5R8X5	Uncharacterized protein	TAOK1	A0A1D5R8X5;F7CMT6;H9ENH7	A0A1D5R8X5_MACMU Uncharacterized protein OS=Macaca mulatta OX=9544 GN=TAOK1 PE=4 SV=1;F7CMT6_MACMU Uncharacterized protein OS=Macaca mulatta OX=9544 GN=TAOK1 PE=4 SV=2;H9ENH7_MACMU Serine/threonine-protein kinase TAO1 isoform 1 OS=Macaca mulatta OX=9544 GN	3	1	1	1	1.4	97.543
F6UM02	Uncharacterized protein	PBLD	F6UM02;F6ULX2;A0A1D5R8Z0	F6UM02_MACMU Uncharacterized protein OS=Macaca mulatta OX=9544 GN=PBLD PE=4 SV=2;F6ULX2_MACMU Uncharacterized protein OS=Macaca mulatta OX=9544 GN=PBLD PE=4 SV=2;A0A1D5R8Z0_MACMU Phenazine biosynthesis-like domain-containing protein isoform a OS=Macaca mul	3	1	1	1	5.3	29.684	23916000
A0A1D5R901	Uncharacterized protein	CYBRD1	A0A1D5R901;F7F7X7	A0A1D5R901_MACMU Uncharacterized protein OS=Macaca mulatta OX=9544 GN=CYBRD1 PE=4 SV=1;F7F7X7_MACMU Cytochrome b reductase 1 isoform 1 OS=Macaca mulatta OX=9544 GN=CYBRD1 PE=2 SV=1	2	3	3	3	17.5	25.363	96776000	67929000	111230000		57631000		71888000	74352000	88887000
G7MSW1	Ovarian carcinoma immunoreactive antigen	EGK_15707	G7MSW1;A0A1D5R913;F6U3Z7;H9FWA7;H9FWA6	G7MSW1_MACMU Ovarian carcinoma immunoreactive antigen OS=Macaca mulatta OX=9544 GN=EGK_15707 PE=4 SV=1;A0A1D5R913_MACMU Uncharacterized protein OS=Macaca mulatta OX=9544 GN=OCIAD1 PE=4 SV=1;F6U3Z7_MACMU Uncharacterized protein OS=Macaca mulatta OX=9544 GN=	5	5	5	5	24.2	27.562	370770000	373300000	231650000	291200000	342910000	342850000	390780000	437470000	421780000
A0A1D5R957	Uncharacterized protein	HSPA8	A0A1D5R957;F6RLH5;I0FRC9;A0A1D5RDA2;A0A1D5R5R1;A0A1D5QA43;F7H1B9;A0A1D5RFM4;A0A1D5Q045;A0A1D5QYF8;Q6UIP1	A0A1D5R957_MACMU Uncharacterized protein OS=Macaca mulatta OX=9544 GN=HSPA8 PE=3 SV=1;F6RLH5_MACMU Uncharacterized protein OS=Macaca mulatta OX=9544 GN=HSPA8 PE=3 SV=2;I0FRC9_MACMU Heat shock cognate 71 kDa protein isoform 1 OS=Macaca mulatta OX=9544 GN=HS	11	34	9	33	58.4	67.794	12740000000	13840000000	16537000000	17142000000	19758000000	15150000000	14697000000	12827000000	13927000000
A0A1D5R971	Integrin-linked protein kinase	ILK	A0A1D5R971;F7C2W0;A0A1D5R4A2;A0A1D5R325;Q3YAQ5	A0A1D5R971_MACMU Integrin-linked protein kinase OS=Macaca mulatta OX=9544 GN=ILK PE=2 SV=1;F7C2W0_MACMU Uncharacterized protein OS=Macaca mulatta OX=9544 GN=ILK PE=4 SV=2;A0A1D5R4A2_MACMU Uncharacterized protein OS=Macaca mulatta OX=9544 GN=ILK PE=4 SV=1	5	13	13	13	30.5	51.419	601300000	615470000	706980000	536850000	463120000	612780000	988290000	812920000	731740000
A0A1D5R999	Alpha-crystallin B chain	CRYAB	A0A1D5R999;F7H3G0	A0A1D5R999_MACMU Alpha-crystallin B chain OS=Macaca mulatta OX=9544 GN=CRYAB PE=2 SV=1;F7H3G0_MACMU Uncharacterized protein OS=Macaca mulatta OX=9544 GN=CRYAB PE=3 SV=2	2	17	17	17	73.1	20.145	18087000000	25525000000	17045000000	17062000000	17972000000	27795000000	63704000000	30476000000	28804000000
G7N533	APC-binding protein EB1	MAPRE1	G7N533;A0A1D5R9A4;H9FRI0;F7B5Z1	G7N533_MACMU APC-binding protein EB1 OS=Macaca mulatta OX=9544 GN=MAPRE1 PE=2 SV=1;A0A1D5R9A4_MACMU Uncharacterized protein OS=Macaca mulatta OX=9544 PE=4 SV=1	4	7	7	7	29.1	30.003	203820000	152940000	276390000	186820000	313170000	172610000	148090000	87134000	153260000
A0A1D5R9A7	Uncharacterized protein	TMEM14B	A0A1D5R9A7;H9EXZ5;F7HLB1	A0A1D5R9A7_MACMU Uncharacterized protein OS=Macaca mulatta OX=9544 GN=TMEM14B PE=4 SV=1	3	3	3	3	50	11.482	36037000	52316000	34230000	44228000	65572000	29208000	31485000	19471000	49478000
A0A1D5RD25	Uncharacterized protein	EPB41L2	A0A1D5RD25;A0A1D5R9H5;I0FPW6;F7BWK5;I0FPW7;H9FR34;A0A1D5RB95;F7GU70;A0A1D5Q810;G7MQD7;A0A1D5RK67;F7BWI9;F7GU74;H9F9A7	A0A1D5RD25_MACMU Uncharacterized protein OS=Macaca mulatta OX=9544 GN=EPB41L2 PE=4 SV=1;A0A1D5R9H5_MACMU Uncharacterized protein OS=Macaca mulatta OX=9544 GN=EPB41L2 PE=4 SV=1;I0FPW6_MACMU Band 4.1-like protein 2 isoform a OS=Macaca mulatta OX=9544 GN=EPB4	14	8	7	8	13.1	83.111	61106000	46685000	50886000	61664000	25408000	44736000	27817000		24510000
F7FGV8	Uncharacterized protein	RBM28	F7FGV8;A0A1D5R9H7;F7FGX7;H9ZAN9;H9FWH9	F7FGV8_MACMU Uncharacterized protein OS=Macaca mulatta OX=9544 GN=RBM28 PE=4 SV=2;A0A1D5R9H7_MACMU Uncharacterized protein OS=Macaca mulatta OX=9544 GN=RBM28 PE=4 SV=1;F7FGX7_MACMU Uncharacterized protein OS=Macaca mulatta OX=9544 GN=RBM28 PE=4 SV=2;H9ZAN9	5	3	3	3	5.5	70.236
A0A1D5R9J9	Nucleoside diphosphate kinase	NME3	A0A1D5R9J9;H9ELS8	A0A1D5R9J9_MACMU Nucleoside diphosphate kinase OS=Macaca mulatta OX=9544 GN=NME3 PE=3 SV=1;H9ELS8_MACMU Nucleoside diphosphate kinase OS=Macaca mulatta OX=9544 GN=NME3 PE=2 SV=1	2	2	2	2	35.3	9.3134
A0A1D5R9P8	Uncharacterized protein	ARHGDIA	A0A1D5R9P8;H9FB02;A0A1D5QQ87;F6VTL8;G7NHA6	A0A1D5R9P8_MACMU Uncharacterized protein OS=Macaca mulatta OX=9544 GN=ARHGDIA PE=4 SV=1;H9FB02_MACMU Rho GDP-dissociation inhibitor 1 isoform a (Fragment) OS=Macaca mulatta OX=9544 GN=ARHGDIA PE=2 SV=1;A0A1D5QQ87_MACMU Uncharacterized protein OS=Macaca mul	5	8	8	8	36.2	25.664	566060000	689880000	785130000	772210000	739090000	588130000	702990000	489980000	490100000
A0A1D5R9V3	Uncharacterized protein	TMEM143	A0A1D5R9V3;F7H5H0	A0A1D5R9V3_MACMU Uncharacterized protein OS=Macaca mulatta OX=9544 GN=TMEM143 PE=4 SV=1;F7H5H0_MACMU Uncharacterized protein OS=Macaca mulatta OX=9544 GN=TMEM143 PE=4 SV=2	2	6	6	6	20.3	51.922	193760000	199910000	80025000	218900000	105330000	202860000	222460000	197770000	190170000
H9Z795	Echinoderm microtubule-associated protein-like 2 isoform 2	EML2	H9Z795;F6R3N5;A0A1D5RA02;H9F9C7;I2CTK3;G7NMY6;A0A1D5R806;A0A1D5R3D6;A0A1D5QKC6;A0A1D5REZ7;A0A1D5R0E6;A0A1D5QRJ3	H9Z795_MACMU Echinoderm microtubule-associated protein-like 2 isoform 2 OS=Macaca mulatta OX=9544 GN=EML2 PE=2 SV=1;F6R3N5_MACMU Uncharacterized protein OS=Macaca mulatta OX=9544 GN=EML2 PE=4 SV=2;A0A1D5RA02_MACMU Uncharacterized protein OS=Macaca mulatta	12	6	6	6	10.9	70.705	121610000	116940000	137190000	128790000	135210000	162010000	102370000	88020000	138590000
F7FT12	Uncharacterized protein	NOSTRIN	F7FT12;A0A1D5RA47;F7FT19	F7FT12_MACMU Uncharacterized protein OS=Macaca mulatta OX=9544 GN=NOSTRIN PE=4 SV=1;A0A1D5RA47_MACMU Uncharacterized protein OS=Macaca mulatta OX=9544 GN=NOSTRIN PE=4 SV=1;F7FT19_MACMU Uncharacterized protein OS=Macaca mulatta OX=9544 GN=NOSTRIN PE=4 SV=2	3	1	1	1	4	54.7	173980000	203640000	167460000	193520000	166200000	133880000	290190000	215740000	147120000
F7A5Q1	Uncharacterized protein	BRIX1	F7A5Q1;G7MV30;A0A1D5RA59	F7A5Q1_MACMU Uncharacterized protein OS=Macaca mulatta OX=9544 GN=BRIX1 PE=4 SV=2;G7MV30_MACMU Brix domain-containing protein 2 OS=Macaca mulatta OX=9544 GN=EGK_16417 PE=4 SV=1;A0A1D5RA59_MACMU Ribosome biogenesis protein BRX1 homolog OS=Macaca mulatta OX=	3	3	3	3	8	39.33			35085000		65218000
H9EQ80	Hsp90 co-chaperone Cdc37	CDC37	H9EQ80;A0A1D5RA77;G7NL01;F7DRC7;A0A1D5QHG2	H9EQ80_MACMU Hsp90 co-chaperone Cdc37 OS=Macaca mulatta OX=9544 GN=CDC37 PE=2 SV=1;A0A1D5RA77_MACMU Uncharacterized protein OS=Macaca mulatta OX=9544 GN=CDC37 PE=4 SV=1;G7NL01_MACMU Hsp90 chaperone protein kinase-targeting subunit OS=Macaca mulatta OX=9544	5	8	8	8	20.6	44.438	216650000	186740000	242900000	256490000	260210000	308730000	124230000	131470000	192200000
F7GVS5	Uncharacterized protein	PIN4	F7GVS5;H9H5Q3;G7NS38;F6UK49;A0A1D5RAA7;F6UJE6	F7GVS5_MACMU Uncharacterized protein OS=Macaca mulatta OX=9544 GN=PIN4 PE=4 SV=2;H9H5Q3_MACMU Peptidyl-prolyl cis-trans isomerase OS=Macaca mulatta OX=9544 GN=LOC723355 PE=4 SV=1;G7NS38_MACMU Peptidyl-prolyl cis-trans isomerase OS=Macaca mulatta OX=9544 GN	6	1	1	1	9.5	13.568		12919000
F7AFD5	Uncharacterized protein	STAU1	F7AFD5;H9F8B3;H9EU20;F7AER2;G7N4K9;H9YVP3;A0A1D5RAC9	F7AFD5_MACMU Uncharacterized protein OS=Macaca mulatta OX=9544 GN=STAU1 PE=4 SV=2;H9F8B3_MACMU Double-stranded RNA-binding protein Staufen homolog 1 isoform c (Fragment) OS=Macaca mulatta OX=9544 GN=STAU1 PE=2 SV=1;H9EU20_MACMU Double-stranded RNA-binding	7	1	1	1	4.8	29.666
A0A1D5RAF5	Uncharacterized protein	CLGN	A0A1D5RAF5;A0A1D5RGX1;H9EWN7;F6ZBR0;F7HQ99	A0A1D5RAF5_MACMU Uncharacterized protein OS=Macaca mulatta OX=9544 GN=CLGN PE=3 SV=1;A0A1D5RGX1_MACMU Uncharacterized protein OS=Macaca mulatta OX=9544 GN=CLGN PE=3 SV=1;H9EWN7_MACMU Calmegin OS=Macaca mulatta OX=9544 GN=CLGN PE=2 SV=1;F6ZBR0_MACMU Unchara	5	2	2	2	11.6	49.595							47579000
A0A1D5RAL5	Uncharacterized protein	SPTAN1	A0A1D5RAL5;H9ZCR5;H9EN73;G7NFS0	A0A1D5RAL5_MACMU Uncharacterized protein OS=Macaca mulatta OX=9544 GN=SPTAN1 PE=4 SV=1;H9ZCR5_MACMU Spectrin alpha chain, brain isoform 1 OS=Macaca mulatta OX=9544 GN=SPTAN1 PE=2 SV=1;H9EN73_MACMU Spectrin alpha chain, brain isoform 1 OS=Macaca mulatta OX=	4	130	1	130	63.3	287.71	11701000000	11615000000	9974600000	10942000000	8934300000	10989000000	12247000000	11016000000	11509000000
A0A1D5RKJ2	DNA helicase	MCM3	A0A1D5RKJ2;G7MPK6;A0A1D5RAN0;A0A1D5Q7N2;F7HAX4;H9FL08;H9F1F8;H9FB14;H9FL07;A0A1D5RKF1	A0A1D5RKJ2_MACMU DNA helicase OS=Macaca mulatta OX=9544 GN=MCM3 PE=3 SV=1;G7MPK6_MACMU DNA helicase OS=Macaca mulatta OX=9544 GN=EGK_15008 PE=3 SV=1;A0A1D5RAN0_MACMU DNA helicase OS=Macaca mulatta OX=9544 GN=MCM3 PE=2 SV=1;A0A1D5Q7N2_MACMU Uncharacterized	10	5	5	5	7.4	89.908			48260000	57456000	93747000		23760000
A0A1D5RAQ9	Multifunctional fusion protein	ALDH4A1	A0A1D5RAQ9;G7MHB6;F6STY8;F7FP82	A0A1D5RAQ9_MACMU Multifunctional fusion protein OS=Macaca mulatta OX=9544 GN=ALDH4A1 PE=3 SV=1;G7MHB6_MACMU Multifunctional fusion protein OS=Macaca mulatta OX=9544 GN=ALDH4A1 PE=2 SV=1;F6STY8_MACMU Multifunctional fusion protein OS=Macaca mulatta OX=9544	4	15	15	15	35.3	60.764	788270000	904780000	618010000	998020000	846010000	786430000	386790000	1122800000	773150000
F6WKX3	Eukaryotic translation initiation factor 2A	EIF2A	F6WKX3;F6U3K9;F6WKS2;H9ER36;A0A1D5RAS0;F6WKS9	F6WKX3_MACMU Eukaryotic translation initiation factor 2A OS=Macaca mulatta OX=9544 GN=EIF2A PE=3 SV=2;F6U3K9_MACMU Eukaryotic translation initiation factor 2A OS=Macaca mulatta OX=9544 GN=EIF2A PE=3 SV=2;F6WKS2_MACMU Eukaryotic translation initiation facto	6	3	3	3	7.9	58.484	21357000		35713000	37597000	20558000
A0A1D5RAS1	Proteasome subunit alpha type	PSMA2	A0A1D5RAS1;F7AC21;G7MLF5;A0A1D5QZ56	A0A1D5RAS1_MACMU Proteasome subunit alpha type OS=Macaca mulatta OX=9544 GN=PSMA2 PE=2 SV=1;F7AC21_MACMU Proteasome endopeptidase complex OS=Macaca mulatta OX=9544 GN=PSMA2 PE=3 SV=2;G7MLF5_MACMU Proteasome subunit alpha type OS=Macaca mulatta OX=9544 GN=E	4	4	4	4	27.8	25.898	146230000	145210000	173530000	167630000	248750000	141800000	163880000	155660000	177410000
A0A1D5RAU6	Uncharacterized protein	MYL3	A0A1D5RAU6;F7G4P0;H9FB39	A0A1D5RAU6_MACMU Uncharacterized protein OS=Macaca mulatta OX=9544 GN=MYL3 PE=4 SV=1;F7G4P0_MACMU Uncharacterized protein OS=Macaca mulatta OX=9544 GN=MYL3 PE=4 SV=2	3	22	19	22	83.2	21.959	135180000000	148840000000	93730000000	140800000000	119520000000	156010000000	142680000000	155010000000	152310000000
A0A1D5RAY2	Elongation factor 1-alpha	LOC100425937	A0A1D5RAY2;A0A1D5QQ96;Q3YAI9	A0A1D5RAY2_MACMU Elongation factor 1-alpha OS=Macaca mulatta OX=9544 GN=LOC100425937 PE=3 SV=1;A0A1D5QQ96_MACMU Elongation factor 1-alpha OS=Macaca mulatta OX=9544 GN=LOC100425937 PE=3 SV=1	3	17	1	1	52.9	48.613		93368000	140230000	160040000	643840000	91972000	84634000	58742000
A0A1D5RAY5	Uncharacterized protein	MYO1E	A0A1D5RAY5;G7MXK2;F6RKD2;G7NNA9;F7C433;A0A1D5Q4G0	A0A1D5RAY5_MACMU Uncharacterized protein OS=Macaca mulatta OX=9544 GN=MYO1E PE=3 SV=1;G7MXK2_MACMU Myosin-Ic (Fragment) OS=Macaca mulatta OX=9544 GN=EGK_17536 PE=3 SV=1;F6RKD2_MACMU Myosin-Ie OS=Macaca mulatta OX=9544 GN=MYO1E PE=2 SV=2;G7NNA9_MACMU Unchar	6	4	4	4	4.3	126.78		21110000		34428000	54650000		37278000
G7MJA0	Uncharacterized protein (Fragment)	EGK_11893	G7MJA0;A0A1D5RB11;Q0R2F5	G7MJA0_MACMU Uncharacterized protein (Fragment) OS=Macaca mulatta OX=9544 GN=EGK_11893 PE=4 SV=1;A0A1D5RB11_MACMU Uncharacterized protein OS=Macaca mulatta OX=9544 GN=SPATA16 PE=4 SV=1;Q0R2F5_MACMU Spermatogenesis associated 16 (Fragment) OS=Macaca mulatta	3	2	2	2	3.5	65.224	202720000	182090000	155870000	190920000	168020000	212950000	210140000	223660000	209800000
A0A1D5RB17	Uncharacterized protein	LOC106999368	A0A1D5RB17;G7MXB9;F7FS40;F7FB94;H9FQA0;F7FB84	A0A1D5RB17_MACMU Uncharacterized protein OS=Macaca mulatta OX=9544 GN=LOC106999368 PE=4 SV=1;G7MXB9_MACMU Uncharacterized protein (Fragment) OS=Macaca mulatta OX=9544 GN=EGK_18059 PE=4 SV=1;F7FS40_MACMU NEDD8 OS=Macaca mulatta OX=9544 GN=LOC106999368 PE=2	6	2	2	2	15.9	19.488	47238000	83986000	52311000	69218000	87638000	37639000	61362000	47004000	68424000
A0A1D5RB27	Uncharacterized protein	PPP1R7	A0A1D5RB27;F7GK00;G7N9D7;H9F975;I2CYD6;F7GK02;A0A1D5Q4A0	A0A1D5RB27_MACMU Uncharacterized protein OS=Macaca mulatta OX=9544 GN=PPP1R7 PE=4 SV=1;F7GK00_MACMU Uncharacterized protein OS=Macaca mulatta OX=9544 GN=PPP1R7 PE=4 SV=2;G7N9D7_MACMU Uncharacterized protein OS=Macaca mulatta OX=9544 GN=EGK_04990 PE=4 SV=1;	7	7	7	7	28.4	33.964	127670000	134560000	121800000	118940000	110650000	102990000	118880000	128500000	104890000
G7MM58	Uncharacterized protein (Fragment)	EGK_14058	G7MM58;A0A1D5RBB9;F7ERF2	G7MM58_MACMU Uncharacterized protein (Fragment) OS=Macaca mulatta OX=9544 GN=EGK_14058 PE=4 SV=1;A0A1D5RBB9_MACMU Uncharacterized protein OS=Macaca mulatta OX=9544 GN=TES PE=4 SV=1;F7ERF2_MACMU Testin isoform 1 OS=Macaca mulatta OX=9544 GN=TES PE=2 SV=1	3	4	4	4	11.4	46.999	13681000	19224000	98764000	58061000	88291000	41425000	10706000	13703000	18919000
A0A1D5RBD3	Uncharacterized protein	MYBBP1A	A0A1D5RBD3;H9Z4D7;H9FNS1;F6WNC5;G7NHX2	A0A1D5RBD3_MACMU Uncharacterized protein OS=Macaca mulatta OX=9544 GN=MYBBP1A PE=4 SV=1;H9Z4D7_MACMU Myb-binding protein 1A isoform 2 OS=Macaca mulatta OX=9544 GN=MYBBP1A PE=2 SV=1;H9FNS1_MACMU Myb-binding protein 1A isoform 2 OS=Macaca mulatta OX=9544 GN=	5	2	2	2	1.7	148.24			20976000	20645000	45713000
F7C314	Gap junction protein	GJA1	F7C314;A0A1D5RBF7	F7C314_MACMU Gap junction protein OS=Macaca mulatta OX=9544 GN=GJA1 PE=2 SV=1;A0A1D5RBF7_MACMU Gap junction protein OS=Macaca mulatta OX=9544 GN=GJA1 PE=3 SV=1	2	7	7	7	28	43.052	526680000	430920000	285830000	412900000	346960000	301480000	512210000	534740000	364360000
A0A1D5RBI2	Uncharacterized protein	PARL	A0A1D5RBI2;F7GFW7;F7FXP9;H9EWC9	A0A1D5RBI2_MACMU Uncharacterized protein OS=Macaca mulatta OX=9544 GN=PARL PE=4 SV=1;F7GFW7_MACMU Uncharacterized protein OS=Macaca mulatta OX=9544 GN=PARL PE=4 SV=2;F7FXP9_MACMU Uncharacterized protein OS=Macaca mulatta OX=9544 GN=PARL PE=4 SV=2;H9EWC9_MA	4	1	1	1	3.8	32.753
A0A1D5RBN3	Histone deacetylase	HDAC2	A0A1D5RBN3;G7MQP8;F7EW26;H9EPU4;F6WIM9;A0A1D5RH08;H9F1C8;A0A1D5RBJ5;H9Z897;F6RIU8	A0A1D5RBN3_MACMU Histone deacetylase OS=Macaca mulatta OX=9544 GN=HDAC2 PE=3 SV=1;G7MQP8_MACMU Histone deacetylase OS=Macaca mulatta OX=9544 GN=EGK_15423 PE=3 SV=1;F7EW26_MACMU Histone deacetylase OS=Macaca mulatta OX=9544 GN=HDAC2 PE=3 SV=2;H9EPU4_MACMU H	10	2	2	2	6.6	51.968	16683000			40507000	54149000		15888000
A0A1D5RBN8	Uncharacterized protein		A0A1D5RBN8;G7N3T8	A0A1D5RBN8_MACMU Uncharacterized protein OS=Macaca mulatta OX=9544 PE=4 SV=1;G7N3T8_MACMU Uncharacterized protein OS=Macaca mulatta OX=9544 GN=EGK_03028 PE=4 SV=1	2	1	1	1	4.4	33.434	2422600000	2398900000	1939300000	2046600000	1605600000	2488400000	1871700000	2821800000	1701400000
A0A1D5RBQ9	Uncharacterized protein		A0A1D5RBQ9;G8F141;A0A0H4LVG4;A0A1D5QNI2;F7H150;A0A0H4LJP5;A0A0H4LHR0;A0A0H4LFQ5;A0A0H4LVF6;A0A0H4LFP0;G8F1J8;G7NAL7;F6SD32;F7A8G3;A0A1D5QNY4;F7A308;F7G0V7;F7H886	A0A1D5RBQ9_MACMU Uncharacterized protein OS=Macaca mulatta OX=9544 PE=4 SV=1;G8F141_MACMU Uncharacterized protein (Fragment) OS=Macaca mulatta OX=9544 GN=EGK_20216 PE=4 SV=1;A0A0H4LVG4_MACMU Immunglobulin light chain variable region (Fragment) OS=Macaca mu	18	3	3	3	28.8	13.164	88172000	77357000	54293000	27896000	16072000	70304000	53920000	94533000
F7H3Z1	Uncharacterized protein	DECR1	F7H3Z1;A0A1D5RBX4;H9FHV0;G7MFU4;F7G1U3;F7G1V3	F7H3Z1_MACMU Uncharacterized protein OS=Macaca mulatta OX=9544 GN=DECR1 PE=4 SV=2;A0A1D5RBX4_MACMU 2,4-dienoyl-CoA reductase, mitochondrial OS=Macaca mulatta OX=9544 GN=DECR1 PE=4 SV=1;H9FHV0_MACMU 2,4-dienoyl-CoA reductase, mitochondrial (Fragment) OS=Mac	6	17	17	17	62.2	34.627	5807700000	7411200000	3499000000	4995600000	3816400000	7781400000	4364700000	5712500000	5599300000
F7HIT9	Uncharacterized protein	RMDN1	F7HIT9;H9EX12;G7MZP9;A0A1D5RC37;A0A1D5QUX3	F7HIT9_MACMU Uncharacterized protein OS=Macaca mulatta OX=9544 GN=RMDN1 PE=4 SV=2;H9EX12_MACMU Regulator of microtubule dynamics protein 1 OS=Macaca mulatta OX=9544 GN=FAM82B PE=2 SV=1;G7MZP9_MACMU Regulator of microtubule dynamics protein 1 OS=Macaca mula	5	6	6	6	22.5	32.527	137260000	154560000	112150000	161210000	183520000	193050000	118920000	92279000	112210000
A0A1D5RC92	Uncharacterized protein	MOB4	A0A1D5RC92;I0FKR6;G7N8K5;F7BG90;F6U6U2;F7FUS4;F7D0Z7;G7N594;F7H0S9;A0A1D5QPW2;H9FAV3;F7BD54;A0A1D5QNL2	A0A1D5RC92_MACMU Uncharacterized protein OS=Macaca mulatta OX=9544 GN=MOB4 PE=3 SV=1;I0FKR6_MACMU 10 kDa heat shock protein, mitochondrial OS=Macaca mulatta OX=9544 GN=HSPE1 PE=2 SV=1;G7N8K5_MACMU Uncharacterized protein (Fragment) OS=Macaca mulatta OX=954	13	8	4	8	76	10.836	5071700000	5102200000	4092300000	4727700000	5458400000	5454400000	4110500000	4437000000	4581400000
A0A1D5RCC5	Uncharacterized protein	TRMT112	A0A1D5RCC5;F7CV76	A0A1D5RCC5_MACMU Uncharacterized protein OS=Macaca mulatta OX=9544 GN=TRMT112 PE=4 SV=1;F7CV76_MACMU tRNA methyltransferase 112 homolog OS=Macaca mulatta OX=9544 GN=TRMT112 PE=2 SV=1	2	1	1	1	13.2	11.986		11151000	27054000	28104000	36708000	18485000	11828000		13701000
G7N282	Uncharacterized protein (Fragment)	EGK_19754	G7N282;A0A1D5RCE3;F7F694	G7N282_MACMU Uncharacterized protein (Fragment) OS=Macaca mulatta OX=9544 GN=EGK_19754 PE=3 SV=1;A0A1D5RCE3_MACMU Uncharacterized protein OS=Macaca mulatta OX=9544 GN=PCBD1 PE=3 SV=1;F7F694_MACMU Pterin-4-alpha-carbinolamine dehydratase OS=Macaca mulatta O	3	7	6	7	74.8	11.868	241400000	217830000	138340000	242370000	167290000	230290000	215530000	187810000	178410000
A0A1D5RF90	Uncharacterized protein	ASAH1	A0A1D5RF90;A0A1D5RCK6;I2CY55;I0FJI2;H9FUK7;F6S5F3;F6S5C7;F6S5E6	A0A1D5RF90_MACMU Uncharacterized protein OS=Macaca mulatta OX=9544 GN=ASAH1 PE=3 SV=1;A0A1D5RCK6_MACMU Uncharacterized protein OS=Macaca mulatta OX=9544 GN=ASAH1 PE=3 SV=1;I2CY55_MACMU Acid ceramidase isoform a preproprotein OS=Macaca mulatta OX=9544 GN=AS	8	11	11	11	31.9	41.892	824000000	720450000	383430000	500120000	470300000	534770000	906920000	884380000	763910000
F7HTC1	Uncharacterized protein	CTBP2	F7HTC1;F7HJS2;G7MG50;A0A1D5RCT1;H9Z5J8;F7GP87;A0A1D5RJE7;F7HTZ1;F7ERU1;F7HTC3;F7HTC6	F7HTC1_MACMU Uncharacterized protein OS=Macaca mulatta OX=9544 GN=CTBP2 PE=3 SV=1;F7HJS2_MACMU Uncharacterized protein OS=Macaca mulatta OX=9544 GN=CTBP1 PE=3 SV=2;G7MG50_MACMU C-terminal-binding protein 1 (Fragment) OS=Macaca mulatta OX=9544 GN=EGK_00060	11	1	1	1	3.4	29.325		12890000	22473000	16610000					12520000
H9YZ45	Protein TBRG4 isoform 1	TBRG4	H9YZ45;G7MLC7;A0A1D5RCT4;F7GNY7;F7GNY9	H9YZ45_MACMU Protein TBRG4 isoform 1 OS=Macaca mulatta OX=9544 GN=TBRG4 PE=2 SV=1;G7MLC7_MACMU Protein TBRG4 isoform 1 OS=Macaca mulatta OX=9544 GN=TBRG4 PE=2 SV=1;A0A1D5RCT4_MACMU Uncharacterized protein OS=Macaca mulatta OX=9544 GN=TBRG4 PE=4 SV=1;F7GNY7	5	7	7	7	13.9	71.095	151870000	153410000	112880000	169240000	141450000	187590000	357270000	351340000	169170000
A0A1D5RL38	Uncharacterized protein	TXNDC17	A0A1D5RL38;A0A1D5RCZ3	A0A1D5RL38_MACMU Uncharacterized protein OS=Macaca mulatta OX=9544 GN=TXNDC17 PE=4 SV=1;A0A1D5RCZ3_MACMU Thioredoxin domain-containing protein 17 OS=Macaca mulatta OX=9544 GN=TXNDC17 PE=2 SV=1	2	2	2	2	30	9.0771	20089000		30631000	22724000	33740000	21899000	12396000	15087000	18725000
G7NKG1	Rho-associated protein kinase 1 (Fragment)	EGK_09570	G7NKG1;H9EPT5;A0A1D5RD07;F6T5Y1	G7NKG1_MACMU Rho-associated protein kinase 1 (Fragment) OS=Macaca mulatta OX=9544 GN=EGK_09570 PE=3 SV=1;H9EPT5_MACMU Rho-associated protein kinase OS=Macaca mulatta OX=9544 GN=ROCK1 PE=2 SV=1;A0A1D5RD07_MACMU Rho-associated protein kinase OS=Macaca mulatt	4	2	2	2	1.6	157.73	156820000	146740000	101740000	111800000	62945000	181230000	113540000	39129000	68592000
A0A1D5RD29	Uncharacterized protein	TXN2	A0A1D5RD29;H9F5V0;G7N3Q8	A0A1D5RD29_MACMU Uncharacterized protein OS=Macaca mulatta OX=9544 GN=TXN2 PE=4 SV=1;H9F5V0_MACMU Thioredoxin, mitochondrial (Fragment) OS=Macaca mulatta OX=9544 GN=TXN2 PE=2 SV=1;G7N3Q8_MACMU Thioredoxin, mitochondrial OS=Macaca mulatta OX=9544 GN=TXN2 PE	3	1	1	1	23.4	7.0271	28901000	59131000	25600000	30061000	48794000	32820000		33663000	39468000
F7CKT2	Casein kinase II subunit alpha isoform a	CSNK2A1	F7CKT2;A0A1D5RD87;F7CKT9;A0A1D5RL05;A0A1D5RA92;F7CKR9	F7CKT2_MACMU Casein kinase II subunit alpha isoform a OS=Macaca mulatta OX=9544 GN=CSNK2A1 PE=2 SV=2;A0A1D5RD87_MACMU Uncharacterized protein OS=Macaca mulatta OX=9544 GN=CSNK2A1 PE=3 SV=1;F7CKT9_MACMU Uncharacterized protein OS=Macaca mulatta OX=9544 GN=C	6	6	6	6	18.4	45.143	54817000	84158000	63724000	99397000	101440000	61424000	52171000	63231000	51149000
A0A1D5RD96	Ras-related protein Rab-3A	RAB3A	A0A1D5RD96;F7ASU4	A0A1D5RD96_MACMU Ras-related protein Rab-3A OS=Macaca mulatta OX=9544 GN=RAB3A PE=2 SV=1;F7ASU4_MACMU Uncharacterized protein OS=Macaca mulatta OX=9544 GN=RAB3A PE=4 SV=2	2	3	3	3	19.5	24.984	32502000	28142000		29184000	44421000	18654000	27076000		27726000
G7MT12	Lysosome membrane protein 2 isoform 1	SCARB2	G7MT12;A0A1D5RDD4;F7H503;A0A1D5QCN9;A0A1D5QTC6	G7MT12_MACMU Lysosome membrane protein 2 isoform 1 OS=Macaca mulatta OX=9544 GN=SCARB2 PE=2 SV=1;A0A1D5RDD4_MACMU Uncharacterized protein OS=Macaca mulatta OX=9544 GN=SCARB2 PE=3 SV=1;F7H503_MACMU Uncharacterized protein OS=Macaca mulatta OX=9544 GN=SCARB2	5	8	8	8	18	54.247	277040000	191440000	131300000	157650000	122960000	141530000	205450000	405490000	188290000
G7NQ58	V-type proton ATPase subunit	ATP6V0D1	G7NQ58;A0A1D5RDE4	G7NQ58_MACMU V-type proton ATPase subunit OS=Macaca mulatta OX=9544 GN=ATP6V0D1 PE=2 SV=1;A0A1D5RDE4_MACMU V-type proton ATPase subunit OS=Macaca mulatta OX=9544 GN=ATP6V0D1 PE=3 SV=1	2	2	2	2	5.4	40.329	17706000		16656000	15958000	17320000	14184000			17310000
F7H3A8	Uncharacterized protein	LAMA2	F7H3A8;A0A1D5RDE7;F7H3B1;A0A1D5Q5U5;H9F6P1;H9FG43;A0A1D5QWV0;F6VZ75;F6VZB6	F7H3A8_MACMU Uncharacterized protein OS=Macaca mulatta OX=9544 GN=LAMA2 PE=4 SV=2;A0A1D5RDE7_MACMU Uncharacterized protein OS=Macaca mulatta OX=9544 GN=LAMA2 PE=4 SV=1;F7H3B1_MACMU Uncharacterized protein OS=Macaca mulatta OX=9544 GN=LAMA2 PE=4 SV=2;A0A1D5	9	79	1	1	29.1	344.15	57559000	35737000	32020000	23395000	16226000	29755000	54696000	61163000	48278000
A0A1D5RDF7	Uncharacterized protein		A0A1D5RDF7	A0A1D5RDF7_MACMU Uncharacterized protein OS=Macaca mulatta OX=9544 PE=4 SV=1	1	1	1	1	7.2	16.847
A0A1D5RDG7	Uncharacterized protein	COL6A6	A0A1D5RDG7;A0A1D5QJE0	A0A1D5RDG7_MACMU Uncharacterized protein OS=Macaca mulatta OX=9544 GN=COL6A6 PE=4 SV=1;A0A1D5QJE0_MACMU Uncharacterized protein OS=Macaca mulatta OX=9544 GN=COL6A6 PE=4 SV=1	2	10	10	10	5.7	247.09	68229000	300840000	30196000	40048000	132740000	21569000	13340000	25620000	29854000
A0A1D5RDG9	Uncharacterized protein	DNPEP	A0A1D5RDG9;H9Z081;F7ERR7;G7N900;F7ERT5;H9F0A5	A0A1D5RDG9_MACMU Uncharacterized protein OS=Macaca mulatta OX=9544 GN=DNPEP PE=3 SV=1;H9Z081_MACMU Aspartyl aminopeptidase OS=Macaca mulatta OX=9544 GN=DNPEP PE=2 SV=1;F7ERR7_MACMU Uncharacterized protein OS=Macaca mulatta OX=9544 GN=DNPEP PE=3 SV=2;G7N900	6	4	4	4	11.7	44.981	189150000	148570000	66960000	137140000	102060000		181980000	121320000	158330000
A0A1D5RDJ8	Glucose transporter type 4, insulin-responsive	SLC2A4	A0A1D5RDJ8;A0A1D5RKU4;F7F3Z8;F7GKY4	A0A1D5RDJ8_MACMU Glucose transporter type 4, insulin-responsive OS=Macaca mulatta OX=9544 GN=SLC2A4 PE=3 SV=1;A0A1D5RKU4_MACMU Uncharacterized protein OS=Macaca mulatta OX=9544 GN=SLC2A4 PE=3 SV=1;F7F3Z8_MACMU Uncharacterized protein OS=Macaca mulatta OX=9	4	3	3	3	9.2	54.784	166550000	102750000	93626000	120030000	82789000	101520000	110080000	196250000	183440000
H9FAD0	rRNA 2-O-methyltransferase fibrillarin (Fragment)	FBL	H9FAD0;F7GIB8;I0FKC0;H9YV05;A0A1D5RDW4;A0A1D5RD17;H9FE87;G7MVV0;F7ED78	H9FAD0_MACMU rRNA 2-O-methyltransferase fibrillarin (Fragment) OS=Macaca mulatta OX=9544 GN=FBL PE=2 SV=1;F7GIB8_MACMU Uncharacterized protein OS=Macaca mulatta OX=9544 GN=FBL PE=3 SV=2;I0FKC0_MACMU rRNA 2-O-methyltransferase fibrillarin OS=Macaca mulatt	9	4	4	4	18.9	27.366			40983000	36918000	48618000	31470000			20545000
F7G3N0	MICOS complex subunit	CHCHD3	F7G3N0;H9FW98;A0A1D5RDY2;G7MME4	F7G3N0_MACMU MICOS complex subunit OS=Macaca mulatta OX=9544 GN=CHCHD3 PE=2 SV=1;H9FW98_MACMU MICOS complex subunit OS=Macaca mulatta OX=9544 GN=CHCHD3 PE=2 SV=1;A0A1D5RDY2_MACMU MICOS complex subunit OS=Macaca mulatta OX=9544 GN=CHCHD3 PE=3 SV=1;G7MME4_MA	4	11	11	11	39.6	26.124	1798300000	1998200000	1440400000	1948800000	1464200000	1843300000	1999800000	1953400000	2135500000
A0A1D5RDY5	Uncharacterized protein	MYL2	A0A1D5RDY5;F7C5K1;A0A1D5QYG0;G7NA53;F7H6W4	A0A1D5RDY5_MACMU Uncharacterized protein OS=Macaca mulatta OX=9544 GN=MYL2 PE=4 SV=1;F7C5K1_MACMU Uncharacterized protein OS=Macaca mulatta OX=9544 GN=MYL2 PE=4 SV=2	5	22	22	22	95.2	18.859	101290000000	107670000000	61740000000	94288000000	79369000000	80675000000	101270000000	120920000000	122570000000
H9EPE5	Leucine-rich repeat flightless-interacting protein 2 isoform 3	LRRFIP2	H9EPE5;A0A1D5RDZ9;G7MJ23;F6YA06;H9ZFA8;H9EUI0;A0A1D5R5D4;F6Y9Y9;A0A1D5QS57;F7FEW0;A0A1D5QZD0	H9EPE5_MACMU Leucine-rich repeat flightless-interacting protein 2 isoform 3 OS=Macaca mulatta OX=9544 GN=LRRFIP2 PE=2 SV=1;A0A1D5RDZ9_MACMU Uncharacterized protein OS=Macaca mulatta OX=9544 GN=LRRFIP2 PE=4 SV=1;G7MJ23_MACMU Uncharacterized protein OS=Macac	11	2	1	2	5	48.252	25205000		32264000	35599000	27726000	28903000	36485000
A0A1D5RE38	Uncharacterized protein	MLIP	A0A1D5RE38;A0A1D5R741;A0A1D5Q2D3;F7EI76;F7EI71;A0A1D5QQ47;H9FF08;A0A1D5Q5D6	A0A1D5RE38_MACMU Uncharacterized protein OS=Macaca mulatta OX=9544 GN=MLIP PE=4 SV=1;A0A1D5R741_MACMU Uncharacterized protein OS=Macaca mulatta OX=9544 GN=MLIP PE=4 SV=1;A0A1D5Q2D3_MACMU Uncharacterized protein OS=Macaca mulatta OX=9544 GN=MLIP PE=4 SV=1;F	8	17	6	17	26.8	107.01	460910000	429890000	199210000	402390000	267270000	469530000	458990000	512410000	440530000
F6TT84	Adenylate kinase isoenzyme 1	AK1	F6TT84;A0A1D5RED3;F6RRJ7;A0A1D5QMR2;G7MHL5;F6V935	F6TT84_MACMU Adenylate kinase isoenzyme 1 OS=Macaca mulatta OX=9544 GN=AK1 PE=2 SV=1;A0A1D5RED3_MACMU Adenylate kinase isoenzyme 1 OS=Macaca mulatta OX=9544 GN=AK1 PE=3 SV=1;F6RRJ7_MACMU Adenylate kinase isoenzyme 1 OS=Macaca mulatta OX=9544 GN=AK1 PE=3 SV	6	12	12	12	66.5	21.62	3747700000	3649000000	1894900000	2551100000	2013900000	2449900000	2209100000	3838200000	2234400000
A0A1D5REF1	Uncharacterized protein	DNAJB11	A0A1D5REF1;G7MJ31	A0A1D5REF1_MACMU Uncharacterized protein OS=Macaca mulatta OX=9544 GN=DNAJB11 PE=4 SV=1;G7MJ31_MACMU DnaJ homolog subfamily B member 11 OS=Macaca mulatta OX=9544 GN=DNAJB11 PE=2 SV=1	2	3	3	3	14.5	39.188	16930000	15109000	24545000	24542000	50066000	17870000
F6Z6E2	Sidoreflexin	SFXN3	F6Z6E2;H9G0A8;A0A1D5REG7;G7N0Y5;I0FVF2	F6Z6E2_MACMU Sidoreflexin OS=Macaca mulatta OX=9544 GN=SFXN3 PE=3 SV=2;H9G0A8_MACMU Sidoreflexin OS=Macaca mulatta OX=9544 GN=SFXN3 PE=2 SV=1;A0A1D5REG7_MACMU Sidoreflexin OS=Macaca mulatta OX=9544 GN=SFXN3 PE=3 SV=1;G7N0Y5_MACMU Sidoreflexin (Fragment) OS	5	8	7	7	29.4	34.163	217250000	261800000	150870000	109830000	135160000	141070000	193800000	136240000	160850000
A0A1D5REJ7	Uncharacterized protein	TLN1	A0A1D5REJ7;F7HL22;G7NFD2	A0A1D5REJ7_MACMU Uncharacterized protein OS=Macaca mulatta OX=9544 GN=TLN1 PE=4 SV=1;F7HL22_MACMU Uncharacterized protein OS=Macaca mulatta OX=9544 GN=TLN1 PE=4 SV=2;G7NFD2_MACMU Talin-1 OS=Macaca mulatta OX=9544 GN=TLN1 PE=2 SV=1	3	72	63	72	42.3	265.05	2629600000	2778500000	4253500000	2426800000	2163100000	2422600000	3996400000	2783000000	2328200000
I0FNS6	Translational activator GCN1	GCN1L1	I0FNS6;H9Z4P1;H9FP65;F7HRP1;A0A1D5REV1;A0A1D5QYT7;A0A1D5Q926	I0FNS6_MACMU Translational activator GCN1 OS=Macaca mulatta OX=9544 GN=GCN1L1 PE=2 SV=1;H9Z4P1_MACMU Translational activator GCN1 OS=Macaca mulatta OX=9544 GN=GCN1L1 PE=2 SV=1;H9FP65_MACMU Translational activator GCN1 OS=Macaca mulatta OX=9544 GN=GCN1L1 PE	7	9	9	9	4.9	292.8			90292000	53106000	102100000	29156000
A0A1D5REX0	Uncharacterized protein	LDB3	A0A1D5REX0;F6QFR2;H9FI34	A0A1D5REX0_MACMU Uncharacterized protein OS=Macaca mulatta OX=9544 GN=LDB3 PE=4 SV=1;F6QFR2_MACMU Uncharacterized protein OS=Macaca mulatta OX=9544 GN=LDB3 PE=4 SV=2	3	25	0	25	55.8	79.286	14225000000	17518000000	10153000000	12771000000	11472000000	16913000000	10724000000	14835000000	16581000000
I2CW01	40S ribosomal protein S15a	RPS15A	I2CW01;G7NPR2;A0A1D5REY6;F7E891;F7A4F5;F7HIR1;A0A1D5QUN1;F6PRR8;F7GUF9;A0A1D5R5Z7;F7HBE5;G7MY78	I2CW01_MACMU 40S ribosomal protein S15a OS=Macaca mulatta OX=9544 GN=RPS15A PE=2 SV=1;G7NPR2_MACMU 40S ribosomal protein S15a OS=Macaca mulatta OX=9544 GN=EGK_12544 PE=3 SV=1;A0A1D5REY6_MACMU Uncharacterized protein OS=Macaca mulatta OX=9544 PE=3 SV=1;F7E8	12	6	2	6	51.5	14.839	334690000	270720000	556290000	653810000	813740000	390670000	413560000	185700000	235980000
F7FDD1	Eukaryotic translation initiation factor 4E-binding protein 2	EIF4EBP2	F7FDD1;A0A1D5RF13	F7FDD1_MACMU Eukaryotic translation initiation factor 4E-binding protein 2 OS=Macaca mulatta OX=9544 GN=EIF4EBP2 PE=2 SV=1;A0A1D5RF13_MACMU Uncharacterized protein OS=Macaca mulatta OX=9544 GN=EIF4EBP2 PE=4 SV=1	2	1	1	1	11.7	12.939		10288000	13701000		20172000	17706000	12304000	11082000
F7H4R4	Uncharacterized protein	HMGB1	F7H4R4;H9F0G9;H9F1D1;H9F1D0;F6Y7C3;A0A1D5RFB1;G7NJW0;A0A1D5QN55;A0A1D5QUE6;F6W2A6;A0A1D5Q450;G7N8W3;A0A1D5QQE2	F7H4R4_MACMU Uncharacterized protein OS=Macaca mulatta OX=9544 GN=HMGB1 PE=4 SV=2;H9F0G9_MACMU High mobility group protein B1 (Fragment) OS=Macaca mulatta OX=9544 GN=HMGB1 PE=2 SV=1;H9F1D1_MACMU High mobility group protein B1 (Fragment) OS=Macaca mulatta O	13	9	9	9	46.5	18.474	708300000	843550000	849390000	704820000	1199300000	653010000	880680000	625410000	763130000
A0A1D5RFH2	Uncharacterized protein	TNNI3	A0A1D5RFH2;G7NNT3;A0A1D5QI60;F7CY58;A0A1D5RIM8;H9F838	A0A1D5RFH2_MACMU Uncharacterized protein OS=Macaca mulatta OX=9544 GN=TNNI3 PE=4 SV=1;G7NNT3_MACMU Uncharacterized protein (Fragment) OS=Macaca mulatta OX=9544 GN=EGK_11062 PE=4 SV=1;A0A1D5QI60_MACMU Uncharacterized protein OS=Macaca mulatta OX=9544 GN=TNN	6	17	17	17	61.9	23.948	29373000000	34968000000	16218000000	26045000000	28439000000	27931000000	29722000000	45574000000	40029000000
F7BBE3	Uncharacterized protein	EEA1	F7BBE3;G7N7Y5;H9G0K4;A0A1D5RFK5	F7BBE3_MACMU Uncharacterized protein OS=Macaca mulatta OX=9544 GN=EEA1 PE=4 SV=2;G7N7Y5_MACMU Endosome-associated protein p162 (Fragment) OS=Macaca mulatta OX=9544 GN=EGK_04053 PE=4 SV=1;H9G0K4_MACMU Early endosome antigen 1 OS=Macaca mulatta OX=9544 GN=EE	4	4	4	4	3.6	156.57
F6VGP5	Cold shock domain-containing protein E1 isoform 3	CSDE1	F6VGP5;A0A1D5RFS1;H9EMW2;F6VGN9;G7MIK2;F6VGQ4;A0A1D5QMU2	F6VGP5_MACMU Cold shock domain-containing protein E1 isoform 3 OS=Macaca mulatta OX=9544 GN=CSDE1 PE=2 SV=2;A0A1D5RFS1_MACMU Uncharacterized protein OS=Macaca mulatta OX=9544 GN=CSDE1 PE=4 SV=1;H9EMW2_MACMU Cold shock domain-containing protein E1 isoform 4	7	6	6	6	10.3	85.746		54968000	65011000	69601000	119390000	64930000	43577000
A0A1D5RFT5	Uncharacterized protein	RARS	A0A1D5RFT5;I2CYS0;G7MVU9;F7ED88	A0A1D5RFT5_MACMU Uncharacterized protein OS=Macaca mulatta OX=9544 GN=RARS PE=3 SV=1;I2CYS0_MACMU Arginyl-tRNA synthetase, cytoplasmic OS=Macaca mulatta OX=9544 GN=RARS PE=2 SV=1;G7MVU9_MACMU Uncharacterized protein OS=Macaca mulatta OX=9544 GN=EGK_17110 P	4	10	10	10	17.2	74.988	97217000	90048000	93907000	127050000	180140000	95400000	104290000	91626000	91906000
A0A1D5RFZ2	Uncharacterized protein	ACOT2	A0A1D5RFZ2;F7F8Z9	A0A1D5RFZ2_MACMU Uncharacterized protein OS=Macaca mulatta OX=9544 GN=ACOT2 PE=4 SV=1;F7F8Z9_MACMU Uncharacterized protein OS=Macaca mulatta OX=9544 GN=ACOT2 PE=4 SV=2	2	13	13	13	39.1	50.607	1248700000	921070000	655040000	1155400000	886660000	666240000	892410000	1258800000	1053200000
G7NKZ1	Eukaryotic translation initiation factor 3 subunit G	EIF3G	G7NKZ1;F7HE98;A0A1D5RGD0	G7NKZ1_MACMU Eukaryotic translation initiation factor 3 subunit G OS=Macaca mulatta OX=9544 GN=EIF3G PE=3 SV=1;F7HE98_MACMU Eukaryotic translation initiation factor 3 subunit G OS=Macaca mulatta OX=9544 GN=EIF3G PE=3 SV=2;A0A1D5RGD0_MACMU Eukaryotic transl	3	3	3	3	13.5	35.343	17178000		50420000	56285000	62682000	21640000	18843000
A0A1D5RIL9	NAD(P)(+)--arginine ADP-ribosyltransferase	ART3	A0A1D5RIL9;F7H733;A0A1D5RGS9;G7MT14	A0A1D5RIL9_MACMU NAD(P)(+)--arginine ADP-ribosyltransferase OS=Macaca mulatta OX=9544 GN=ART3 PE=3 SV=1;F7H733_MACMU NAD(P)(+)--arginine ADP-ribosyltransferase OS=Macaca mulatta OX=9544 GN=ART3 PE=3 SV=2;A0A1D5RGS9_MACMU NAD(P)(+)--arginine ADP-ribosyltran	4	6	6	6	19	40.338	277450000	279130000	154240000	292590000	131100000	192380000	543330000	393740000	329950000
G7N9K9	Uncharacterized protein (Fragment)	EGK_05132	G7N9K9;A0A1D5RGU1;A0A1D5QNS3;F7FRJ3;A0A1D5RJS1;A0A1D5RFU0;A0A1D5RHV3;A0A1D5QXY1;G7NS22;F7CFF5	G7N9K9_MACMU Uncharacterized protein (Fragment) OS=Macaca mulatta OX=9544 GN=EGK_05132 PE=3 SV=1;A0A1D5RGU1_MACMU Uncharacterized protein OS=Macaca mulatta OX=9544 GN=HADHB PE=3 SV=1;A0A1D5QNS3_MACMU Uncharacterized protein OS=Macaca mulatta OX=9544 GN=HAD	10	29	29	29	63.6	51.123	15040000000	15868000000	10100000000	13835000000	10762000000	14108000000	18438000000	18110000000	17944000000
A0A1D5RH00	Uncharacterized protein		A0A1D5RH00;I0FKI8;F7FQQ0	A0A1D5RH00_MACMU Uncharacterized protein OS=Macaca mulatta OX=9544 PE=4 SV=1;I0FKI8_MACMU DnaJ homolog subfamily C member 7 isoform 1 OS=Macaca mulatta OX=9544 GN=DNAJC7 PE=2 SV=1;F7FQQ0_MACMU Uncharacterized protein OS=Macaca mulatta OX=9544 GN=DNAJC7 PE=	3	1	1	1	3.8	26.662			31548000	13034000			4040200
H9FCE6	Histone H2B (Fragment)	HIST1H2BK	H9FCE6;H9FAT4;I2CXT1;H9H2V4;G7MR19;F7BDS2;A0A1D5RH28;G7MR99;G7MR54;F7GHH1;F7BRE5;H9F1G2	H9FCE6_MACMU Histone H2B (Fragment) OS=Macaca mulatta OX=9544 GN=HIST1H2BK PE=2 SV=1;H9FAT4_MACMU Histone H2B (Fragment) OS=Macaca mulatta OX=9544 GN=HIST1H2BD PE=2 SV=1;I2CXT1_MACMU Histone H2B OS=Macaca mulatta OX=9544 GN=HIST1H2BD PE=2 SV=1;H9H2V4_MACMU	12	8	2	8	69.8	10.73	14912000000	20535000000	20438000000	15560000000	19618000000	15987000000	19025000000	14974000000	17227000000
A0A1D5RH44	Uncharacterized protein	PELO	A0A1D5RH44;H9ETC4;F7GLR6	A0A1D5RH44_MACMU Uncharacterized protein OS=Macaca mulatta OX=9544 GN=PELO PE=4 SV=1;H9ETC4_MACMU Protein pelota homolog OS=Macaca mulatta OX=9544 GN=PELO PE=2 SV=1;F7GLR6_MACMU Protein pelota homolog OS=Macaca mulatta OX=9544 GN=PELO PE=3 SV=1	3	2	2	2	9.5	30.047		12502000		18941000			14886000
G7N383	Citrate transport protein (Fragment)	EGK_02780	G7N383;H9FYQ4;F7GRH3;A0A1D5RH47;A0A1D5REI4	G7N383_MACMU Citrate transport protein (Fragment) OS=Macaca mulatta OX=9544 GN=EGK_02780 PE=3 SV=1;H9FYQ4_MACMU Tricarboxylate transport protein, mitochondrial OS=Macaca mulatta OX=9544 GN=SLC25A1 PE=2 SV=1;F7GRH3_MACMU Uncharacterized protein OS=Macaca mu	5	2	2	2	9.4	27.068	13244000	11329000	10645000
H9F003	39S ribosomal protein L23, mitochondrial (Fragment)	MRPL23	H9F003;I0FU14;A0A1D5RH64;F6VP73	H9F003_MACMU 39S ribosomal protein L23, mitochondrial (Fragment) OS=Macaca mulatta OX=9544 GN=MRPL23 PE=2 SV=1;I0FU14_MACMU 39S ribosomal protein L23, mitochondrial OS=Macaca mulatta OX=9544 GN=MRPL23 PE=2 SV=1;A0A1D5RH64_MACMU Uncharacterized protein OS=M	4	2	2	2	27.3	12.942	44921000	30747000		33924000	29983000	33561000	56217000	55075000	43897000
A0A1D5RHC4	Erythrocyte tropomodulin	TMOD1	A0A1D5RHC4;F7DS60;A0A1D5RBQ1;F6PSC9	A0A1D5RHC4_MACMU Erythrocyte tropomodulin OS=Macaca mulatta OX=9544 GN=TMOD1 PE=2 SV=1;F7DS60_MACMU Uncharacterized protein OS=Macaca mulatta OX=9544 GN=TMOD1 PE=4 SV=2;A0A1D5RBQ1_MACMU Uncharacterized protein OS=Macaca mulatta OX=9544 GN=TMOD1 PE=4 SV=1	4	20	20	20	63.5	40.569	1887300000	1949000000	1204800000	1415600000	1068000000	1827800000	1892000000	2134100000	1945600000
A0A1D5RHL4	Uncharacterized protein	PEF1	A0A1D5RHL4;F7FE57;G7MI76	A0A1D5RHL4_MACMU Uncharacterized protein OS=Macaca mulatta OX=9544 GN=PEF1 PE=4 SV=1;F7FE57_MACMU Uncharacterized protein OS=Macaca mulatta OX=9544 GN=PEF1 PE=4 SV=1;G7MI76_MACMU Uncharacterized protein OS=Macaca mulatta OX=9544 GN=EGK_00490 PE=4 SV=1	3	2	2	2	8.3	29.458					17888000		19533000	22354000
A0A1D5RHS0	Amino acid transporter	SLC1A5	A0A1D5RHS0;G7NN15;I0FUB7;F6XIZ0	A0A1D5RHS0_MACMU Amino acid transporter OS=Macaca mulatta OX=9544 GN=SLC1A5 PE=3 SV=1;G7NN15_MACMU Amino acid transporter OS=Macaca mulatta OX=9544 GN=EGK_10801 PE=3 SV=1;I0FUB7_MACMU Amino acid transporter OS=Macaca mulatta OX=9544 GN=SLC1A5 PE=2 SV=1	4	3	3	3	8.2	46.618			90037000			27269000		32592000
F7E2S4	Proteasome subunit alpha type	PSMA3	F7E2S4;A0A1D5RHS9;I0FTI4;A0A1D5QJV2;A0A1D5R0L6;A0A1D5RHB5;A0A1D5QSE9;A0A1D5Q0E2	F7E2S4_MACMU Proteasome subunit alpha type OS=Macaca mulatta OX=9544 GN=PSMA3 PE=2 SV=1;A0A1D5RHS9_MACMU Proteasome subunit alpha type OS=Macaca mulatta OX=9544 GN=PSMA3 PE=3 SV=1;I0FTI4_MACMU Proteasome subunit alpha type OS=Macaca mulatta OX=9544 GN=PSMA	8	6	6	6	24.7	28.433	270800000	241240000	226550000	252870000	340090000	280860000	250080000	256050000	241220000
A0A1D5RI14	Uncharacterized protein	ENO2	A0A1D5RI14;F7GGD8;F6X1V9;F7G4Y6	A0A1D5RI14_MACMU Uncharacterized protein OS=Macaca mulatta OX=9544 GN=ENO2 PE=4 SV=1;F7GGD8_MACMU Uncharacterized protein OS=Macaca mulatta OX=9544 GN=ENO2 PE=3 SV=2;F6X1V9_MACMU Gamma-enolase OS=Macaca mulatta OX=9544 GN=ENO2 PE=2 SV=1;F7G4Y6_MACMU Unchar	4	5	3	3	22.9	34.736	367710000	365020000	240910000	225390000	240160000	205930000	204470000	213180000	380980000
F7HUA1	Syntenin-1 isoform 3	SDCBP	F7HUA1;A0A1D5RI39;A0A1D5RHP0	F7HUA1_MACMU Syntenin-1 isoform 3 OS=Macaca mulatta OX=9544 GN=SDCBP PE=2 SV=2;A0A1D5RI39_MACMU Uncharacterized protein OS=Macaca mulatta OX=9544 GN=SDCBP PE=4 SV=1	3	4	1	1	23.6	32.354		17789000					18857000	20411000
A0A1D5RIA2	Stathmin	STMN1	A0A1D5RIA2;G7MHQ3;I0FRN2;F6WZM7	A0A1D5RIA2_MACMU Stathmin OS=Macaca mulatta OX=9544 GN=STMN1 PE=3 SV=1;G7MHQ3_MACMU Stathmin (Fragment) OS=Macaca mulatta OX=9544 GN=EGK_00403 PE=3 SV=1;I0FRN2_MACMU Stathmin OS=Macaca mulatta OX=9544 GN=STMN1 PE=2 SV=1;F6WZM7_MACMU Stathmin OS=Macaca mula	4	3	2	3	23.4	16.926		23245000	34742000	25864000	96027000
A0A1D5RIC2	Uncharacterized protein	EFEMP1	A0A1D5RIC2;G7NA36	A0A1D5RIC2_MACMU Uncharacterized protein OS=Macaca mulatta OX=9544 GN=EFEMP1 PE=4 SV=1;G7NA36_MACMU EGF-containing fibulin-like extracellular matrix protein 1 OS=Macaca mulatta OX=9544 GN=EFEMP1 PE=2 SV=1	2	1	1	1	2.5	48.108	41011000		77225000		27757000
A0A1D5RIK8	Uncharacterized protein	RPL18	A0A1D5RIK8;F7H349;A0A1D5RK31;A0A1D5RDS8;A0A1D5RF55;A0A1D5QLP8;F6TNU0;G7NR34;G7NNQ5;G7N8G4;F7FXS5;G7NJC9;G7NKJ0;F7CF67	A0A1D5RIK8_MACMU Uncharacterized protein OS=Macaca mulatta OX=9544 GN=RPL18 PE=4 SV=1;F7H349_MACMU 60S ribosomal protein L18 OS=Macaca mulatta OX=9544 GN=RPL18 PE=2 SV=1;A0A1D5RK31_MACMU Uncharacterized protein OS=Macaca mulatta OX=9544 GN=RPL18 PE=4 SV=1;	14	3	2	3	22	18.091		204900000	279150000	407500000	455960000	374020000	316810000
H9Z644	Leukocyte elastase inhibitor	SERPINB1	H9Z644;A0A1D5RIS2;F7HA34;H9FL93;F6WMK4;H9YWZ7;H9EWE1;G7NKV3;G7MJD1;F6X1C6	H9Z644_MACMU Leukocyte elastase inhibitor OS=Macaca mulatta OX=9544 GN=SERPINB1 PE=2 SV=1;A0A1D5RIS2_MACMU Leukocyte elastase inhibitor OS=Macaca mulatta OX=9544 GN=SERPINB1 PE=2 SV=1;F7HA34_MACMU Uncharacterized protein OS=Macaca mulatta OX=9544 GN=SERPIN	10	9	9	9	28.2	42.642	168130000	173180000	210250000	99724000	130990000	177840000	323880000	196360000	139410000
F7E976	Uncharacterized protein	NID2	F7E976;F7E981;A0A1D5RIU6;G7MXX1	F7E976_MACMU Uncharacterized protein OS=Macaca mulatta OX=9544 GN=NID2 PE=4 SV=2;F7E981_MACMU Uncharacterized protein OS=Macaca mulatta OX=9544 GN=NID2 PE=4 SV=2;A0A1D5RIU6_MACMU Uncharacterized protein OS=Macaca mulatta OX=9544 GN=NID2 PE=4 SV=1;G7MXX1_MA	4	12	11	11	17.6	108.02	244430000	295810000	327600000	277380000	353930000	425320000	443510000	335950000	460000000
G7MWG1	Uncharacterized protein	EGK_18568	G7MWG1;F7CKN8;A0A1D5RIW5	G7MWG1_MACMU Uncharacterized protein OS=Macaca mulatta OX=9544 GN=EGK_18568 PE=4 SV=1;F7CKN8_MACMU NudC domain-containing protein 2 OS=Macaca mulatta OX=9544 GN=NUDCD2 PE=2 SV=1;A0A1D5RIW5_MACMU Uncharacterized protein OS=Macaca mulatta OX=9544 GN=NUDCD2 P	3	1	1	1	11.5	17.704
A0A1D5RIX1	Uncharacterized protein	SRRM2	A0A1D5RIX1;F6XRR4;G7NP51;H9EZ31;A0A1D5QE53	A0A1D5RIX1_MACMU Uncharacterized protein OS=Macaca mulatta OX=9544 GN=SRRM2 PE=4 SV=1;F6XRR4_MACMU Uncharacterized protein OS=Macaca mulatta OX=9544 GN=SRRM2 PE=4 SV=2;G7NP51_MACMU Uncharacterized protein (Fragment) OS=Macaca mulatta OX=9544 GN=EGK_12403 P	5	6	6	6	3.1	293.88			33230000	13030000	217030000	10166000
H9EMP1	Kinesin light chain 1 isoform 1	KLC1	H9EMP1;H9FU76;H9EMP0;F6R5J8;F7H1A6;F7H167;F7H169;H9FU77;H9FU78;H9EMP2;A0A1D5RJ26;F6R4Z4;F6PNC1;F6QRC7;F6QRB8;G7NC68;A0A1D5QTR6;I2CXH8;F6YHS7	H9EMP1_MACMU Kinesin light chain 1 isoform 1 OS=Macaca mulatta OX=9544 GN=KLC1 PE=2 SV=1;H9FU76_MACMU Kinesin light chain 1 isoform 2 OS=Macaca mulatta OX=9544 GN=KLC1 PE=2 SV=1;H9EMP0_MACMU Kinesin light chain 1 isoform 2 OS=Macaca mulatta OX=9544 GN=KLC1	19	6	6	6	11.6	63.829	43244000	48168000	60871000	41328000	84572000	54195000	55833000		56369000
F6UWA0	Arp2/3 complex 34 kDa subunit	ARPC2	F6UWA0;A0A1D5RJ31;F6UWC3;A0A1D5RAQ1	F6UWA0_MACMU Arp2/3 complex 34 kDa subunit OS=Macaca mulatta OX=9544 GN=ARPC2 PE=3 SV=2;A0A1D5RJ31_MACMU Arp2/3 complex 34 kDa subunit OS=Macaca mulatta OX=9544 GN=ARPC2 PE=2 SV=1	4	11	11	11	40.8	34.437	187270000	194770000	335700000	285010000	357930000	188890000	234510000	116060000	170490000
F6SGB4	Uncharacterized protein	KNG1	F6SGB4;A0A1D5RJ77;F6SG43	F6SGB4_MACMU Uncharacterized protein OS=Macaca mulatta OX=9544 GN=KNG1 PE=4 SV=2;A0A1D5RJ77_MACMU Uncharacterized protein OS=Macaca mulatta OX=9544 GN=KNG1 PE=4 SV=1;F6SG43_MACMU Uncharacterized protein OS=Macaca mulatta OX=9544 GN=KNG1 PE=4 SV=1	3	2	2	2	9	43.858	63625000	27306000	62131000			39017000	28359000	45783000	16990000
F7CJI8	Uncharacterized protein	GPD2	F7CJI8;A0A1D5RJ98;H9FT68;F7CJJ4;H9EYQ8;F7HRW4	F7CJI8_MACMU Uncharacterized protein OS=Macaca mulatta OX=9544 GN=GPD2 PE=4 SV=2;A0A1D5RJ98_MACMU Glycerol-3-phosphate dehydrogenase OS=Macaca mulatta OX=9544 GN=GPD2 PE=2 SV=1	6	21	21	21	40.2	76.629	565660000	669380000	503560000	663830000	511530000	483280000	467920000	733630000	898790000
A0A1D5RJA3	Protein C receptor	PROCR	A0A1D5RJA3;F7F7R4	A0A1D5RJA3_MACMU Protein C receptor OS=Macaca mulatta OX=9544 GN=PROCR PE=4 SV=1;F7F7R4_MACMU Endothelial cell protein C receptor OS=Macaca mulatta OX=9544 GN=EGK_02471 PE=4 SV=1	2	1	1	1	4.4	23.263			20096000	10117000	12631000	5571500
G7N8G7	Uncharacterized protein	EGK_04605	G7N8G7;F7FY86;F6QSK2;F7FY82;H9ETF2;A0A1D5RJA5	G7N8G7_MACMU Uncharacterized protein OS=Macaca mulatta OX=9544 GN=EGK_04605 PE=3 SV=1;F7FY86_MACMU Uncharacterized protein OS=Macaca mulatta OX=9544 GN=ITGAV PE=3 SV=2;F6QSK2_MACMU Uncharacterized protein OS=Macaca mulatta OX=9544 GN=ITGAV PE=3 SV=2;F7FY82	6	2	2	2	2.1	99.48			25576000	9200300	10732000
A0A1D5RJA9	V-type proton ATPase subunit a	ATP6V0A1	A0A1D5RJA9;H9ZA69;H9FVX3;F7FMM0;H9FVX1;G7NIL3;A0A1D5QN75;A0A1D5QHA8;A0A1D5R7B0;F7HS27;G7N6A4	A0A1D5RJA9_MACMU V-type proton ATPase subunit a OS=Macaca mulatta OX=9544 GN=ATP6V0A1 PE=3 SV=1;H9ZA69_MACMU V-type proton ATPase subunit a OS=Macaca mulatta OX=9544 GN=ATP6V0A1 PE=2 SV=1;H9FVX3_MACMU V-type proton ATPase subunit a OS=Macaca mulatta OX=954	11	3	3	3	4.7	88.469	31462000		24940000				30069000	29779000
H9Z887	Histone H1.0	H1F0	H9Z887;G7N3T4;A0A1D5RJF7	H9Z887_MACMU Histone H1.0 OS=Macaca mulatta OX=9544 GN=H1F0 PE=2 SV=1;G7N3T4_MACMU Histone H1.0 OS=Macaca mulatta OX=9544 GN=H1F0 PE=2 SV=1;A0A1D5RJF7_MACMU Uncharacterized protein OS=Macaca mulatta OX=9544 GN=H1F0 PE=3 SV=1	3	6	6	6	27.3	20.849	987040000	1392900000	1016700000	699660000	545180000	744290000	1557700000	1515500000	1269400000
F7GRP5	Uncharacterized protein	AKR1D1	F7GRP5;A0A1D5RJH1	F7GRP5_MACMU Uncharacterized protein OS=Macaca mulatta OX=9544 GN=AKR1D1 PE=4 SV=2;A0A1D5RJH1_MACMU Uncharacterized protein OS=Macaca mulatta OX=9544 GN=AKR1D1 PE=4 SV=1	2	1	1	1	3.1	32.771	229240000	118410000	117450000	133180000	96262000	145380000	82261000	126110000	118690000
A0A1D5RJJ5	Uncharacterized protein	FHOD3	A0A1D5RJJ5	A0A1D5RJJ5_MACMU Uncharacterized protein OS=Macaca mulatta OX=9544 GN=FHOD3 PE=4 SV=1	1	1	1	1	0.7	179.67	7133500	27919000			7703000	11467000			17221000
H9F8G3	Peptidylprolyl isomerase (Fragment)	FKBP3	H9F8G3;F7G0S7;A0A1D5RJL3;A0A1D5QQ54;G7MXP0;A0A1D5QJX5	H9F8G3_MACMU Peptidylprolyl isomerase (Fragment) OS=Macaca mulatta OX=9544 GN=FKBP3 PE=2 SV=1;F7G0S7_MACMU Peptidylprolyl isomerase OS=Macaca mulatta OX=9544 GN=FKBP3 PE=2 SV=1;A0A1D5RJL3_MACMU Peptidylprolyl isomerase OS=Macaca mulatta OX=9544 GN=FKBP3 PE	6	5	5	5	29	24.106	159330000	211110000	168870000	186760000	187410000	169050000	182760000	145800000	153760000
F7GE93	Ribosomal protein L19	LOC707834	F7GE93;F7A9N0;A0A1D5RJN2;F6TE71;F6PXC6;A0A1D5QUQ4;F6Z138;G7NH40;G7N0I1	F7GE93_MACMU Ribosomal protein L19 OS=Macaca mulatta OX=9544 GN=LOC707834 PE=3 SV=1;F7A9N0_MACMU Ribosomal protein L19 OS=Macaca mulatta OX=9544 GN=RPL19 PE=2 SV=2;A0A1D5RJN2_MACMU Ribosomal protein L19 OS=Macaca mulatta OX=9544 GN=LOC100423218 PE=3 SV=1;F	9	5	5	5	25.5	23.476	199120000	226630000	445090000	445580000	643440000	364600000	297650000	144870000	179450000
A0A1D5RJR7	Uncharacterized protein	COL6A2	A0A1D5RJR7;H9EVK6;F6XD59;H9YZW0;G7MMF3;F6X6I4;F6X6K5;H9ER49;H9YZW1	A0A1D5RJR7_MACMU Uncharacterized protein OS=Macaca mulatta OX=9544 GN=COL6A2 PE=4 SV=1;H9EVK6_MACMU Collagen alpha-2(VI) chain isoform 2C2 OS=Macaca mulatta OX=9544 GN=COL6A2 PE=2 SV=1;F6XD59_MACMU Uncharacterized protein OS=Macaca mulatta OX=9544 GN=COL6A	9	23	23	23	25.3	107.95	4077100000	4301800000	5075000000	2174400000	1545400000	3226400000	4115300000	3554500000	4435300000
I2CX33	Calcium-transporting ATPase	ATP2A1	I2CX33;G7NQG5;A0A1D5RJU0;A0A1D5QXT2;F7DWY5	I2CX33_MACMU Calcium-transporting ATPase OS=Macaca mulatta OX=9544 GN=ATP2A1 PE=2 SV=1;G7NQG5_MACMU Calcium-transporting ATPase OS=Macaca mulatta OX=9544 GN=EGK_12636 PE=3 SV=1;A0A1D5RJU0_MACMU Calcium-transporting ATPase OS=Macaca mulatta OX=9544 GN=ATP2A	5	16	4	4	19	109.25	45303000
A0A1D5RJX6	Uncharacterized protein	CCDC90B	A0A1D5RJX6;F6TS77;I2CW50;H9EVQ3	A0A1D5RJX6_MACMU Uncharacterized protein OS=Macaca mulatta OX=9544 GN=CCDC90B PE=4 SV=1;F6TS77_MACMU Uncharacterized protein OS=Macaca mulatta OX=9544 GN=CCDC90B PE=4 SV=2;I2CW50_MACMU Coiled-coil domain-containing protein 90B, mitochondrial OS=Macaca mula	4	3	2	3	33.1	15.525	28271000	45157000	23568000	30358000	25114000	24117000	49360000	42812000	37973000
A0A1D5RJX9	Uncharacterized protein	FBLN5	A0A1D5RJX9;F6V2Y9;I0FNH4;F6V301;G7MZ06;H9FJD2	A0A1D5RJX9_MACMU Uncharacterized protein OS=Macaca mulatta OX=9544 GN=FBLN5 PE=4 SV=1;F6V2Y9_MACMU Uncharacterized protein OS=Macaca mulatta OX=9544 GN=FBLN5 PE=4 SV=2;I0FNH4_MACMU Fibulin-5 OS=Macaca mulatta OX=9544 GN=FBLN5 PE=2 SV=1;F6V301_MACMU Unchara	6	5	5	5	16.6	49.86		67700000	123570000	36589000		64147000	58094000	47371000	53712000
A0A1D5RK38	Uncharacterized protein	MFGE8	A0A1D5RK38;G7MYS0;A0A1D5QLJ5	A0A1D5RK38_MACMU Uncharacterized protein OS=Macaca mulatta OX=9544 GN=MFGE8 PE=4 SV=1;G7MYS0_MACMU Lactadherin isoform a OS=Macaca mulatta OX=9544 GN=MFGE8 PE=2 SV=1;A0A1D5QLJ5_MACMU Uncharacterized protein OS=Macaca mulatta OX=9544 GN=MFGE8 PE=4 SV=1	3	9	9	9	35.3	38.413	20299000		842810000	9196100	26654000	54788000	52360000	30364000	52016000
F6QCT1	CD59 glycoprotein preproprotein	CD59	F6QCT1;A0A1D5RK97	F6QCT1_MACMU CD59 glycoprotein preproprotein OS=Macaca mulatta OX=9544 GN=CD59 PE=2 SV=1;A0A1D5RK97_MACMU Uncharacterized protein OS=Macaca mulatta OX=9544 GN=CD59 PE=4 SV=1	2	2	2	2	19.5	14.035	20500000	55011000	53590000	19600000	16847000	17721000	61372000	50141000	33298000
A0A1D5RKK7	Uncharacterized protein	YTHDF3	A0A1D5RKK7;G7N481;F7FNP8;F7HHI8;F7HFH7;H9FSE0;G7MZG0	A0A1D5RKK7_MACMU Uncharacterized protein OS=Macaca mulatta OX=9544 GN=YTHDF3 PE=4 SV=1;G7N481_MACMU Uncharacterized protein (Fragment) OS=Macaca mulatta OX=9544 GN=EGK_02197 PE=4 SV=1;F7FNP8_MACMU YTH domain family protein 1 OS=Macaca mulatta OX=9544 GN=YT	7	1	1	1	2.4	58.311	31296000	13500000	19737000	20178000	54276000	11056000		8242100	43004000
A0A1D5RKM2	Ubiquinone biosynthesis protein COQ4 homolog, mitochondrial	COQ4	A0A1D5RKM2;G7NFS6;I0FS97;H9Z9L5	A0A1D5RKM2_MACMU Ubiquinone biosynthesis protein COQ4 homolog, mitochondrial OS=Macaca mulatta OX=9544 GN=COQ4 PE=3 SV=1;G7NFS6_MACMU Ubiquinone biosynthesis protein COQ4 homolog, mitochondrial OS=Macaca mulatta OX=9544 GN=COQ4 PE=3 SV=1;I0FS97_MACMU Ubiqu	4	1	1	1	5.7	25.388
A0A1D5RKP1	Uncharacterized protein	LIMA1	A0A1D5RKP1;F6TL46;H9FVJ6;G7N6Y9	A0A1D5RKP1_MACMU Uncharacterized protein OS=Macaca mulatta OX=9544 GN=LIMA1 PE=4 SV=1;F6TL46_MACMU Uncharacterized protein OS=Macaca mulatta OX=9544 GN=LIMA1 PE=4 SV=2;H9FVJ6_MACMU LIM domain and actin-binding protein 1 isoform b OS=Macaca mulatta OX=9544	4	4	4	4	9.3	67.103	469310000	414430000	60013000	38010000	60921000	44008000
A0A1D5RKR9	Uncharacterized protein	EIF2B1	A0A1D5RKR9;G7N6A1;H9ETU6	A0A1D5RKR9_MACMU Uncharacterized protein OS=Macaca mulatta OX=9544 GN=EIF2B1 PE=3 SV=1;G7N6A1_MACMU Uncharacterized protein (Fragment) OS=Macaca mulatta OX=9544 GN=EGK_04328 PE=3 SV=1;H9ETU6_MACMU Translation initiation factor eIF-2B subunit alpha OS=Macac	3	4	4	4	21.3	22.357				38246000	43005000
G7NKP8	3-ketoacyl-CoA thiolase, mitochondrial (Fragment)	EGK_09677	G7NKP8;A0A1D5RKT6;H9Z4C4;F6VM61;F7CL53	G7NKP8_MACMU 3-ketoacyl-CoA thiolase, mitochondrial (Fragment) OS=Macaca mulatta OX=9544 GN=EGK_09677 PE=3 SV=1;A0A1D5RKT6_MACMU Uncharacterized protein OS=Macaca mulatta OX=9544 GN=ACAA2 PE=3 SV=1;H9Z4C4_MACMU 3-ketoacyl-CoA thiolase, mitochondrial OS=Mac	5	22	22	22	75.3	41.22	11247000000	10922000000	5639000000	9071700000	7116600000	6307900000	13581000000	10631000000	10575000000
G7NNA1	NADH dehydrogenase [ubiquinone] 1 alpha subcomplex subunit 7	NDUFA7	G7NNA1;A0A1D5RL49;F6VLN0	G7NNA1_MACMU NADH dehydrogenase [ubiquinone] 1 alpha subcomplex subunit 7 OS=Macaca mulatta OX=9544 GN=NDUFA7 PE=2 SV=1;A0A1D5RL49_MACMU Uncharacterized protein OS=Macaca mulatta OX=9544 GN=NDUFA7 PE=4 SV=1;F6VLN0_MACMU Uncharacterized protein OS=Macaca mu	3	7	7	7	69	12.565	796960000	1149700000	513300000	945560000	1462400000	641410000	761230000	749320000	827800000
G7N7A8	Ras-related protein Rab-5B	RAB5B	G7N7A8;F7HL78;A0A1D5RL54;A0A1D5QLP5	G7N7A8_MACMU Ras-related protein Rab-5B OS=Macaca mulatta OX=9544 GN=RAB5B PE=2 SV=1;F7HL78_MACMU Uncharacterized protein OS=Macaca mulatta OX=9544 GN=RAB5B PE=4 SV=2;A0A1D5RL54_MACMU Uncharacterized protein OS=Macaca mulatta OX=9544 GN=RAB5B PE=4 SV=1;A0A	4	6	3	3	33.5	23.783	155830000	178480000	165760000	153620000	156610000	130680000	176400000	177240000	175490000
A0A1I7Q462	NAD-dependent protein deacylase sirtuin-5, mitochondrial	SIRT5	A0A1I7Q462;G7MQR7;F7EZ75;F7EZ68;F7EZ86	A0A1I7Q462_MACMU NAD-dependent protein deacylase sirtuin-5, mitochondrial OS=Macaca mulatta OX=9544 GN=SIRT5 PE=3 SV=1;G7MQR7_MACMU NAD-dependent protein deacylase sirtuin-5, mitochondrial OS=Macaca mulatta OX=9544 GN=SIRT5 PE=2 SV=1;SIR5_MACMU NAD-depende	5	4	4	4	21.4	32.606	185040000	148890000	105830000	184390000	156540000	150890000	99261000	171310000	133670000
Q6IYH7	NADH-ubiquinone oxidoreductase chain 2	ND2	Q6IYH7;A0A343DQY5	Q6IYH7_MACMU NADH-ubiquinone oxidoreductase chain 2 OS=Macaca mulatta OX=9544 GN=ND2 PE=3 SV=1;A0A343DQY5_MACMU NADH-ubiquinone oxidoreductase chain 2 OS=Macaca mulatta vestita OX=2008792 GN=ND2 PE=3 SV=1	2	2	1	2	12.7	38.87		78737000	95954000	70922000	123020000	105350000	128580000		88568000
A0A343DQY6	Cytochrome c oxidase subunit 1	COI	A0A343DQY6;W5S277;Q6IYH6;I3W8K0;A0A0U2CII2;A0A088CEX3;Q49NG9;Q49NG8;A0A411EZ57	A0A343DQY6_MACMU Cytochrome c oxidase subunit 1 OS=Macaca mulatta vestita OX=2008792 GN=COI PE=3 SV=1;W5S277_MACMU Cytochrome c oxidase subunit 1 OS=Macaca mulatta lasiotus OX=1449913 GN=COX1 PE=3 SV=1;Q6IYH6_MACMU Cytochrome c oxidase subunit 1 (Fragment)	9	4	4	4	13.4	57.785	1057000000	1337400000	1119500000	1218700000	1113600000	1110500000	761700000	1195200000	1707600000
A0A343DQY7	Cytochrome c oxidase subunit 2	COII	A0A343DQY7;P98038;A0A0U2CHF5;Q49NB8;Q49NA4;Q49NA3	A0A343DQY7_MACMU Cytochrome c oxidase subunit 2 OS=Macaca mulatta vestita OX=2008792 GN=COII PE=3 SV=1;COX2_MACMU Cytochrome c oxidase subunit 2 OS=Macaca mulatta OX=9544 GN=MT-CO2 PE=3 SV=1;A0A0U2CHF5_MACMU Cytochrome c oxidase subunit 2 OS=Macaca mulatta	6	8	1	1	35.2	25.491			787400000	684610000	22549000	847590000	626780000	4672000	1422600000
A0A343DQY9	ATP synthase subunit a	ATP6	A0A343DQY9;W5S384;A0A0U2CIR4;A0A088CFX3	A0A343DQY9_MACMU ATP synthase subunit a OS=Macaca mulatta vestita OX=2008792 GN=ATP6 PE=4 SV=1;W5S384_MACMU ATP synthase subunit a OS=Macaca mulatta lasiotus OX=1449913 GN=ATP6 PE=4 SV=1;A0A0U2CIR4_MACMU ATP synthase subunit a OS=Macaca mulatta brevicaudus	4	2	2	2	8.4	24.781	1185700000	1221600000	849250000	1175900000	34712000	1697400000	1702100000	16866000	1959000000
Q6IYG9	NADH-ubiquinone oxidoreductase chain 4	ND4	Q6IYG9;A0A343DQZ3	Q6IYG9_MACMU NADH-ubiquinone oxidoreductase chain 4 OS=Macaca mulatta OX=9544 GN=ND4 PE=3 SV=1;A0A343DQZ3_MACMU NADH-ubiquinone oxidoreductase chain 4 OS=Macaca mulatta vestita OX=2008792 GN=ND4 PE=3 SV=1	2	4	1	4	12	52.002	223330000	276160000	376920000	360740000	382910000	185320000	194170000	182330000	500280000
G7NDG8	Prothrombin	EGK_06305	G7NDG8;A0N064	G7NDG8_MACMU Prothrombin OS=Macaca mulatta OX=9544 GN=EGK_06305 PE=3 SV=1;A0N064_MACMU Prothrombin OS=Macaca mulatta OX=9544 GN=F2 PE=2 SV=1	2	3	3	3	7.6	69.834	28963000	18490000	41338000		15373000	25249000	23308000	17213000	27958000
A0N066	Antithrombin III		A0N066;F6Y0N9;G7MFD7;F6Y0M9;CON__P41361	A0N066_MACMU Antithrombin III OS=Macaca mulatta OX=9544 PE=2 SV=1;F6Y0N9_MACMU Uncharacterized protein OS=Macaca mulatta OX=9544 GN=SERPINC1 PE=3 SV=2;G7MFD7_MACMU Uncharacterized protein OS=Macaca mulatta OX=9544 GN=EGK_01985 PE=3 SV=1;F6Y0M9_MACMU Unchar	5	20	20	20	44.4	52.475	2350900000	2218700000	2108000000	1367400000	1027000000	1625000000	2098300000	1596900000	1751600000
I1XBW7	MHC class II DRB antigen (Fragment)	Mamu-DRB	I1XBW7;A4Q982;Q69AC8;Q30604;Q30601;Q95495;C7EDE5;C7EDE4;C7EDE3;C7EDE1;C7EDD5;C7EDD3;F1BUY3;Q9TPC0;Q9MXY8;Q9MXP4;Q9MXP2;Q9MXP1;Q9MXP0;Q9MXN9;Q9MXN6;Q9MXN5;Q7YQ15;Q7YQ14;Q75VL3;Q70W18;Q70W13;Q69AD7;Q69AD6;Q69AD3;Q69AD2;Q69AC9;Q69AC2;Q69AC1;Q30707;Q30678;Q30675;Q30670;Q30660;Q30659;Q30658;Q30648;Q30640;Q30614;Q30611;Q30610;Q30602;Q30599;Q30598;O98041;O19292;O19290;O19284;O19282;O19278;B1PPZ4;B1PPZ1;…	I1XBW7_MACMU MHC class II DRB antigen (Fragment) OS=Macaca mulatta OX=9544 GN=Mamu-DRB PE=2 SV=1;A4Q982_MACMU MHC class II antigen OS=Macaca mulatta OX=9544 GN=drb PE=2 SV=1;Q69AC8_MACMU MHC class II antigen (Fragment) OS=Macaca mulatta OX=9544 GN=Mamu-DRB	151	3	2	3	19	20.299	39370000	39642000	24226000			43961000		49505000	49029000
F7G6J5	Uncharacterized protein	F9	F7G6J5;G7NRQ5;F7GHR4;A8CZ27	F7G6J5_MACMU Uncharacterized protein OS=Macaca mulatta OX=9544 GN=F9 PE=3 SV=1;G7NRQ5_MACMU Uncharacterized protein OS=Macaca mulatta OX=9544 GN=EGK_20999 PE=3 SV=1;F7GHR4_MACMU Uncharacterized protein OS=Macaca mulatta OX=9544 GN=F9 PE=3 SV=1;A8CZ27_MACMU	4	1	1	1	2.6	47.627	33918000	18552000				27178000	52374000	42190000	30739000
C6JUH0	MHC class I antigen (Fragment)	Mamu-B	C6JUH0;B0JDR1;C6JUG3;Q70PL3;Q70PL2;B6E630;B0JDV5;B0JDT8;D5KRH1;D5KRH9;D5KRF3;W6PDF5;D8VPP3;D8VPP2;B2C9Z1;A9XN51;A9XN39;A0A0P1L655;C6K388;M1RZK5;D5MSN3;Q70PM7;B5TRI4;B0Z9U7;A0A1N7SYG4;A0A2H1MZS7;A0A0P1L5K0;A0A0H5BZZ3;D2CKA9	C6JUH0_MACMU MHC class I antigen (Fragment) OS=Macaca mulatta OX=9544 GN=Mamu-B PE=3 SV=1;B0JDR1_MACMU MHC class I antigen (Fragment) OS=Macaca mulatta OX=9544 GN=Mamu-B PE=2 SV=1;C6JUG3_MACMU MHC class I antigen (Fragment) OS=Macaca mulatta OX=9544 GN=Mam	29	6	0	2	30.8	31.834	26923000			15326000	27179000		34103000
B0JDV7	MHC class I antigen (Fragment)	Mamu-B	B0JDV7;D5KRI4;C6L2I8	B0JDV7_MACMU MHC class I antigen (Fragment) OS=Macaca mulatta OX=9544 GN=Mamu-B PE=2 SV=1;D5KRI4_MACMU MHC class I antigen OS=Macaca mulatta OX=9544 GN=Mamu-B PE=2 SV=1;C6L2I8_MACMU MHC class I antigen OS=Macaca mulatta OX=9544 GN=Mamu-B PE=2 SV=1	3	4	1	1	17.4	39.126
I6LPK6	MHC class II antigen (Fragment)	Mamu-DPB1	I6LPK6;W8JAE3;Q18PE8;U6EFM2;B5M481;B2ZHZ0;I6LPK5;D9N3M4;D9N3M0;D9N2V0;D9N3L9;W8JJV1;W8J9K4;A0A060UJF9;A0A060UJ30;A0A060UIF3;A0A024J4Y2;A0A060UNZ2;A0A060UJ21;A2V6F5	I6LPK6_MACMU MHC class II antigen (Fragment) OS=Macaca mulatta OX=9544 GN=Mamu-DPB1 PE=4 SV=1;W8JAE3_MACMU MHC class II antigen (Fragment) OS=Macaca mulatta OX=9544 GN=Mamu-DPB PE=2 SV=1;Q18PE8_MACMU Major histocompatibility complex class II OS=Macaca mula	20	2	2	2	20	10.393									73585000
M9V565	MHC class II antigen (Fragment)	MAMU-DRA	M9V565;M9V2W8;M9V9M2;M9V9L4;M9V8D8;M9V8D2;M9V5B8;M9V5B0;M9V559;M9V2W1;M9V2V6;X5KJE3;S0ES13;S0ES10;Q6EWL5;Q6EWK9;Q6EWK7;Q6EWK6;B3KYU0;M9V9L6;S0ETR9;Q30631	M9V565_MACMU MHC class II antigen (Fragment) OS=Macaca mulatta OX=9544 GN=MAMU-DRA PE=2 SV=1;M9V2W8_MACMU MHC class II antigen (Fragment) OS=Macaca mulatta OX=9544 GN=MAMU-DRA PE=2 SV=1;M9V9M2_MACMU MHC class II antigen (Fragment) OS=Macaca mulatta OX=9544	22	3	3	3	18.7	22.237	118030000	116780000	152040000	107070000	89846000	144120000	237230000	154950000	222090000
H9Z2C6	Monocyte differentiation antigen CD14	CD14	H9Z2C6;B3Y6B8;G7MUY7	H9Z2C6_MACMU Monocyte differentiation antigen CD14 OS=Macaca mulatta OX=9544 GN=CD14 PE=2 SV=1;B3Y6B8_MACMU Monocyte differentiation antigen CD14 OS=Macaca mulatta OX=9544 GN=CD14 PE=2 SV=1;G7MUY7_MACMU Uncharacterized protein OS=Macaca mulatta OX=9544 GN=	3	1	1	1	3.2	40.103
Q95493	DRB1 transplantation antigen (Fragment)	HLA-DRB1	Q95493;Q69AE1;Q30616;O19287;W8JJS6;W8JFP4;Q6EWK0;B5M470	Q95493_MACMU DRB1 transplantation antigen (Fragment) OS=Macaca mulatta OX=9544 GN=HLA-DRB1 PE=4 SV=1;Q69AE1_MACMU MHC class II antigen (Fragment) OS=Macaca mulatta OX=9544 GN=Mamu-DRB PE=4 SV=1;Q30616_MACMU Major histocompatibility complex class II (Fragme	8	1	1	1	23.3	9.0018									60611000
B6CBS7	Galectin	LGALS1	B6CBS7;A0A1D5R3G1;A0A1D5R3A7;G7N3T1	B6CBS7_MACMU Galectin OS=Macaca mulatta OX=9544 GN=LGALS1 PE=2 SV=1;A0A1D5R3G1_MACMU Galectin OS=Macaca mulatta OX=9544 PE=4 SV=1;A0A1D5R3A7_MACMU Galectin OS=Macaca mulatta OX=9544 GN=LGALS1 PE=4 SV=1;G7N3T1_MACMU Galectin (Fragment) OS=Macaca mulatta OX=	4	8	8	8	71.9	14.703	626810000	799800000	1633500000	613770000	816550000	808060000	490990000	320770000	467930000
B8Q9J0	MHC class I antigen (Fragment)	Mamu-A	B8Q9J0;D5KRB8	B8Q9J0_MACMU MHC class I antigen (Fragment) OS=Macaca mulatta OX=9544 GN=Mamu-A PE=2 SV=1;D5KRB8_MACMU MHC class I antigen (Fragment) OS=Macaca mulatta OX=9544 GN=Mamu-A PE=2 SV=1	2	6	1	1	22.9	39.641						21152000
B8Q9K9	MHC class I antigen (Fragment)	Mamu-A	B8Q9K9;C3U1Q5;Q5TM77;Q5TM82;Q5TM80;M1RZH3;F7CIK4;F7CJ50;F7FV36;A0A0H5BVM0	B8Q9K9_MACMU MHC class I antigen (Fragment) OS=Macaca mulatta OX=9544 GN=Mamu-A PE=2 SV=1;C3U1Q5_MACMU MHC class I antigen (Fragment) OS=Macaca mulatta OX=9544 GN=Mamu-A PE=3 SV=1;Q5TM77_MACMU Major histocompatibility complex, class I, AG OS=Macaca mulatta	10	7	0	1	26.6	39.864	61628000	15505000			11623000
H9F0X8	Putative ubiquitin carboxyl-terminal hydrolase FAF-X isoform 3 (Fragment)	USP9X	H9F0X8;H9F0X2;H9F0W3;H9F0W2;H9F0S2;H9F0J7;H9F0J6;H9F0E9;H9EZT1;B8YE12;H9ZE26;H9YUQ6;H9YUQ5;H9YUQ4;H9YUQ3;H9YUQ2;H9YUQ1;H9YUQ0;H9YUP9;F6RFQ9;G7NT09;F6RFN9;F6RFQ2;H9FM63;A0A1D5Q3C2	H9F0X8_MACMU Putative ubiquitin carboxyl-terminal hydrolase FAF-X isoform 3 (Fragment) OS=Macaca mulatta OX=9544 GN=USP9X PE=2 SV=1;H9F0X2_MACMU Putative ubiquitin carboxyl-terminal hydrolase FAF-X isoform 3 (Fragment) OS=Macaca mulatta OX=9544 GN=USP9X PE	25	4	4	4	2.7	206.31	13779000			58876000
C1KES6	Thymidylate synthase (Fragment)		C1KES6;F6ZR77;F6ZRA0	C1KES6_MACMU Thymidylate synthase (Fragment) OS=Macaca mulatta OX=9544 PE=2 SV=1;F6ZR77_MACMU Thymidylate synthase OS=Macaca mulatta OX=9544 GN=TYMS PE=2 SV=1;F6ZRA0_MACMU Uncharacterized protein OS=Macaca mulatta OX=9544 GN=TYMS PE=3 SV=1	3	2	2	2	18.9	18.058					32882000
C7EDE6	MHC class II antigen (Fragment)	Mamu-DRB	C7EDE6;Q30647;W6AYM3;C7EDD2;Q9TPB9;Q9MXP5;Q9MXP3;Q95HG3;Q7YQ20;Q69AD4;Q4W254;W8JTM5;W8JFQ3;I1XC15;I1XC14;I1XC13;I1XC12;I1XC10;C9E8P9;Q7YQ11;Q69AC0	C7EDE6_MACMU MHC class II antigen (Fragment) OS=Macaca mulatta OX=9544 GN=Mamu-DRB PE=4 SV=1;Q30647_MACMU Major histocompatibility complex (Fragment) OS=Macaca mulatta OX=9544 GN=MHC DR beta 1 PE=4 SV=1;W6AYM3_MACMU MHC class II antigen (Fragment) OS=Macac	21	3	0	3	39.2	8.9818							165410000
C9DFA1	MHC class II antigen (Fragment)	Mamu-DPB1	C9DFA1;Q30618;I6LPJ0;I6LPI7;R9TKW1;D9N3M5;W8JTN7;W8JTN4;W8JAE7;W8J9K0;B0Z9W3	C9DFA1_MACMU MHC class II antigen (Fragment) OS=Macaca mulatta OX=9544 GN=Mamu-DPB1 PE=4 SV=1;Q30618_MACMU Major histocompatibility complex (Fragment) OS=Macaca mulatta OX=9544 GN=Mhc DP-beta PE=4 SV=1;I6LPJ0_MACMU MHC class II antigen (Fragment) OS=Macaca	11	2	0	1	24.4	10.228	6582300		5089200				47741000	5171000
D8WRK2	MHC class I antigen (Fragment)	Mamu-A	D8WRK2;O19356;O02944;B8Q9K5;B8Q9K4;O02947;O02946;O02945;O02943;Q5TM79;O02948;H9H407;H9H4F3;A0A1D5QP27;A0A1D5Q1Z6;C5J9D4;A0A1D5RB12;Q5TM78;A0A1G4P183;A0A0P1L5F5;A0A0N7MNG9	D8WRK2_MACMU MHC class I antigen (Fragment) OS=Macaca mulatta OX=9544 GN=Mamu-A PE=2 SV=1;O19356_MACMU MHC class I antigen (Fragment) OS=Macaca mulatta OX=9544 GN=Mamu-AG PE=2 SV=1;O02944_MACMU MHC class I antigen (Fragment) OS=Macaca mulatta OX=9544 GN=Ma	21	8	0	8	30.5	39.747	300710000	208970000	131910000	181730000	163990000	114090000	299160000	136550000	142810000
F7BH77	Uncharacterized protein	PIWIL2	F7BH77;E1AWN8;G7N0N5	F7BH77_MACMU Uncharacterized protein OS=Macaca mulatta OX=9544 GN=PIWIL2 PE=3 SV=2;E1AWN8_MACMU Piwi like-2 protein OS=Macaca mulatta OX=9544 GN=PIWIL2 PE=2 SV=1;G7N0N5_MACMU Uncharacterized protein OS=Macaca mulatta OX=9544 GN=EGK_18757 PE=3 SV=1	3	2	2	2	2.1	105.78	146450000	127690000	137020000	159910000	106730000		149300000	108190000	127050000
E2CXJ9	MHC class I antigen (Fragment)	Mamu-A	E2CXJ9;Q70UE5;Q9MXS5;Q8HX40;B6DYA1;A1YN67;Q70SH4;A2IBC8;A0A2H1MZN9;M1RRC5;M1RE13;B6DYA9;B1A7V6;B1A7V5;B1A7V4;B1A7V3;B1A7V2;B1A7V1;B1A7V0;B1A7U9;B1A7U8;B1A7U7;A5YWC3;A5YWC2;A5YWC0;A5YWB9;A5YWB8;A5YWB7;A1YN79;A1YN78;A1YN77;A1YN76;A1YN75;A1YN74;A1YN73;Q5TM31;B0JDQ7;V5NSH8;B6E634;B6E626;D8WRN2;H9H467;Q5TM81;D7RD86;A7Y1N6;A4GE60;A3F8Y0;A0A238U5P0;A0A238U5B5;A0A238U5A7;A0A238U461;A0A238U428;A0A238U3M5;…	E2CXJ9_MACMU MHC class I antigen (Fragment) OS=Macaca mulatta OX=9544 GN=Mamu-A PE=2 SV=1;Q70UE5_MACMU MHC class I antigen (Fragment) OS=Macaca mulatta OX=9544 GN=Mamu-A PE=2 SV=1;Q9MXS5_MACMU MHC class I heavy chain antigen OS=Macaca mulatta OX=9544 GN=Ma	67	8	0	3	31.1	39.423	154630000	68042000	61450000	44459000	80659000	55543000		36894000
F1D883	Anti-quaternary epitope monoclonal antibody heavy chain (Fragment)		F1D883;F1D882	F1D883_MACMU Anti-quaternary epitope monoclonal antibody heavy chain (Fragment) OS=Macaca mulatta OX=9544 PE=2 SV=1;F1D882_MACMU Anti-quaternary epitope monoclonal antibody heavy chain (Fragment) OS=Macaca mulatta OX=9544 PE=2 SV=1	2	2	1	2	14.6	17.764	3323800000	1423100000	2440400000	1049600000	785390000	1445500000	1321400000	1482500000	1359500000
F1D884	Anti-quaternary epitope monoclonal antibody heavy chain (Fragment)		F1D884;F7B184;F1D887;F1D886	F1D884_MACMU Anti-quaternary epitope monoclonal antibody heavy chain (Fragment) OS=Macaca mulatta OX=9544 PE=2 SV=1;F7B184_MACMU Uncharacterized protein OS=Macaca mulatta OX=9544 GN=LOC106996003 PE=4 SV=2;F1D887_MACMU Anti-quaternary epitope monoclonal ant	4	2	1	1	12.8	17.411	274610000	128550000	169990000	84325000	57473000	112010000	116120000		93222000
F1D885	Anti-quaternary epitope monoclonal antibody heavy chain (Fragment)		F1D885;H9H519;A0A1D5Q493	F1D885_MACMU Anti-quaternary epitope monoclonal antibody heavy chain (Fragment) OS=Macaca mulatta OX=9544 PE=2 SV=1;H9H519_MACMU Uncharacterized protein OS=Macaca mulatta OX=9544 GN=LOC106999628 PE=4 SV=2;A0A1D5Q493_MACMU Uncharacterized protein OS=Macaca	3	2	1	1	13	17.541	58151000		22582000
F1D890	Anti-quaternary epitope monoclonal antibody light chain (Fragment)		F1D890;F1D888	F1D890_MACMU Anti-quaternary epitope monoclonal antibody light chain (Fragment) OS=Macaca mulatta OX=9544 PE=2 SV=1;F1D888_MACMU Anti-quaternary epitope monoclonal antibody light chain (Fragment) OS=Macaca mulatta OX=9544 PE=2 SV=1	2	3	0	1	27.3	14.529		106260000	145270000	119700000	51696000	33106000		79180000
F1D891	Anti-quaternary epitope monoclonal antibody light chain (Fragment)		F1D891;G7N3C9;G7N3D3;F1D889;F1D893;F1D892;F6RFN4;F7DF92	F1D891_MACMU Anti-quaternary epitope monoclonal antibody light chain (Fragment) OS=Macaca mulatta OX=9544 PE=2 SV=1;G7N3C9_MACMU Uncharacterized protein (Fragment) OS=Macaca mulatta OX=9544 GN=EGK_02840 PE=4 SV=1;G7N3D3_MACMU Uncharacterized protein (Fragm	8	4	2	2	34.8	15.084	162260000		21460000				38253000	31542000
F5CI18	Phosphatidylethanolamine-binding protein	PEBP1	F5CI18;F7BYT3;A0A1D5QFC1;G7N5S0;A0A1D5RJG2;G7MKM6	F5CI18_MACMU Phosphatidylethanolamine-binding protein OS=Macaca mulatta OX=9544 GN=PEBP1 PE=2 SV=1;F7BYT3_MACMU Uncharacterized protein OS=Macaca mulatta OX=9544 GN=PEBP1 PE=4 SV=1;A0A1D5QFC1_MACMU Uncharacterized protein OS=Macaca mulatta OX=9544 GN=PEBP1	6	10	10	10	68.4	20.897	5625300000	5760800000	4669000000	4932900000	4223000000	4315600000	2270800000	4209200000	4166100000
F6PIR9	Uncharacterized protein	C6orf125	F6PIR9;G7MRR1;F6PIS7;A0A1D5RG67	F6PIR9_MACMU Uncharacterized protein OS=Macaca mulatta OX=9544 GN=C6orf125 PE=4 SV=1;G7MRR1_MACMU Uncharacterized protein OS=Macaca mulatta OX=9544 GN=EGK_14795 PE=4 SV=1;F6PIS7_MACMU Uncharacterized protein OS=Macaca mulatta OX=9544 GN=C6orf125 PE=2 SV=1	4	3	3	3	35.6	11.963	58878000	72434000	55954000	81322000	80217000	118550000	74034000	83108000	129860000
G7NKT8	Uncharacterized protein	EGK_09738	G7NKT8;F6PJ30;H9ZC35;G7MHM2;A0A1D5Q6E7;G7N5Z4	G7NKT8_MACMU Uncharacterized protein OS=Macaca mulatta OX=9544 GN=EGK_09738 PE=3 SV=1;F6PJ30_MACMU 60S ribosomal protein L11 isoform 1 OS=Macaca mulatta OX=9544 GN=RPL11 PE=2 SV=2;H9ZC35_MACMU 60S ribosomal protein L11 isoform 1 OS=Macaca mulatta OX=9544 G	6	4	4	4	23	20.282	148130000	243660000	452420000	481850000	652950000	273030000	319460000	213920000	189800000
F6PJQ1	Lysophosphatidic acid phosphatase type 6	ACP6	F6PJQ1;F7FN03;A0A1D5R1V3	F6PJQ1_MACMU Lysophosphatidic acid phosphatase type 6 OS=Macaca mulatta OX=9544 GN=ACP6 PE=2 SV=1;F7FN03_MACMU Uncharacterized protein OS=Macaca mulatta OX=9544 GN=ACP6 PE=3 SV=1;A0A1D5R1V3_MACMU Uncharacterized protein OS=Macaca mulatta OX=9544 GN=ACP6 PE	3	8	8	8	22.7	48.558	216070000	234450000	104900000	232020000	143910000	145030000	161000000	151980000	182630000
F6PJS7	Cytochrome b-c1 complex subunit 1, mitochondrial	UQCRC1	F6PJS7;F7GSG0;Q4G3W3	F6PJS7_MACMU Cytochrome b-c1 complex subunit 1, mitochondrial OS=Macaca mulatta OX=9544 GN=UQCRC1 PE=2 SV=2;F7GSG0_MACMU Uncharacterized protein OS=Macaca mulatta OX=9544 GN=UQCRC1 PE=4 SV=2	3	22	22	22	57.3	52.798	21908000000	21748000000	13150000000	19002000000	16059000000	18334000000	21304000000	23080000000	23045000000
H9EV07	Synaptopodin isoform B	SYNPO	H9EV07;I0FNZ7;F6PL92;G7MVM7	H9EV07_MACMU Synaptopodin isoform B OS=Macaca mulatta OX=9544 GN=SYNPO PE=2 SV=1;I0FNZ7_MACMU Synaptopodin isoform A OS=Macaca mulatta OX=9544 GN=SYNPO PE=2 SV=1;F6PL92_MACMU Uncharacterized protein OS=Macaca mulatta OX=9544 GN=SYNPO PE=4 SV=1;G7MVM7_MACMU	4	9	9	9	17.5	73.701	270410000	264170000	214570000	176370000	244030000	252350000	303200000	221580000	330330000
F6PLE2	Synaptobrevin homolog YKT6	YKT6	F6PLE2;A0A1D5R5Z3	F6PLE2_MACMU Synaptobrevin homolog YKT6 OS=Macaca mulatta OX=9544 GN=YKT6 PE=2 SV=1	2	3	3	3	12.6	22.417	46713000	60980000	46789000	53609000
F6PM12	Uncharacterized protein	VWA8	F6PM12;G7NK12;H9FRN3	F6PM12_MACMU Uncharacterized protein OS=Macaca mulatta OX=9544 GN=VWA8 PE=4 SV=2;G7NK12_MACMU Uncharacterized protein (Fragment) OS=Macaca mulatta OX=9544 GN=EGK_09273 PE=4 SV=1;H9FRN3_MACMU Uncharacterized protein OS=Macaca mulatta OX=9544 GN=KIAA0564 PE=	3	5	5	5	3.2	207.29	49556000	47619000	40469000	58956000	37213000	49919000	45183000	65464000	49965000
H9FG31	Protein ECT2 (Fragment)	ECT2	H9FG31;F6PMC7;H9Z618;G7MJA1;F6WHV5	H9FG31_MACMU Protein ECT2 (Fragment) OS=Macaca mulatta OX=9544 GN=ECT2 PE=2 SV=1;F6PMC7_MACMU Uncharacterized protein OS=Macaca mulatta OX=9544 GN=ECT2 PE=4 SV=1;H9Z618_MACMU Protein ECT2 OS=Macaca mulatta OX=9544 GN=ECT2 PE=2 SV=1;G7MJA1_MACMU Uncharacter	5	1	1	1	6.2	20.259	229630000		259370000	386240000	301630000	497050000	203630000	220240000	256320000
H9F7M3	Neutral cholesterol ester hydrolase 1 isoform b (Fragment)	NCEH1	H9F7M3;F6PMM4;A0A1D5QF00;A0A1D5QNF8	H9F7M3_MACMU Neutral cholesterol ester hydrolase 1 isoform b (Fragment) OS=Macaca mulatta OX=9544 GN=NCEH1 PE=2 SV=1;F6PMM4_MACMU Uncharacterized protein OS=Macaca mulatta OX=9544 GN=NCEH1 PE=4 SV=1;A0A1D5QF00_MACMU Uncharacterized protein OS=Macaca mulatt	4	11	11	11	32.4	48.559	579460000	652290000	378370000	472960000	521170000	623440000	824340000	901050000	649950000
F6PMY5	Acyl-coenzyme A thioesterase 13	ACOT13	F6PMY5;A0A1D5Q253	F6PMY5_MACMU Acyl-coenzyme A thioesterase 13 OS=Macaca mulatta OX=9544 GN=ACOT13 PE=2 SV=1;A0A1D5Q253_MACMU Uncharacterized protein OS=Macaca mulatta OX=9544 GN=ACOT13 PE=4 SV=1	2	5	5	5	44.3	14.926	1301000000	1217800000	852640000	719890000	1176200000	1425600000	1020000000	1440600000	1319200000
F6PNA5	Uncharacterized protein	PPA2	F6PNA5;H9F5C5;G7MTJ9;F6PMT8;F6PN98;F6PMS8;F6PN90	F6PNA5_MACMU Uncharacterized protein OS=Macaca mulatta OX=9544 GN=PPA2 PE=4 SV=2;H9F5C5_MACMU Inorganic pyrophosphatase 2, mitochondrial isoform 1 (Fragment) OS=Macaca mulatta OX=9544 GN=PPA2 PE=2 SV=1;G7MTJ9_MACMU Uncharacterized protein OS=Macaca mulatta	7	13	13	13	51.8	34.767	944830000	805200000	682760000	848250000	605120000	768630000	666480000	689300000	696200000
G7MSH7	GrpE protein homolog	EGK_15543	G7MSH7;F6PNE3	G7MSH7_MACMU GrpE protein homolog OS=Macaca mulatta OX=9544 GN=EGK_15543 PE=3 SV=1;F6PNE3_MACMU GrpE protein homolog OS=Macaca mulatta OX=9544 GN=GRPEL1 PE=2 SV=1	2	7	7	7	37.3	24.251	404580000	374010000	264590000	284780000	362150000	306240000	215700000	255040000	191280000
F6PP70	Chloride intracellular channel protein	CLIC4	F6PP70;G7MHP0;A0A1D5RJ72	F6PP70_MACMU Chloride intracellular channel protein OS=Macaca mulatta OX=9544 GN=CLIC4 PE=2 SV=1;G7MHP0_MACMU Chloride intracellular channel protein (Fragment) OS=Macaca mulatta OX=9544 GN=EGK_00388 PE=3 SV=1	3	9	9	9	58.5	28.758	1196900000	922470000	1027400000	582090000	864620000	932370000	1516500000	1425500000	826560000
F6PPQ4	Uncharacterized protein	PLOD2	F6PPQ4;F6WSU7;G7MJK6;H9FVX6;H9FVX5	F6PPQ4_MACMU Uncharacterized protein OS=Macaca mulatta OX=9544 GN=PLOD2 PE=4 SV=2;F6WSU7_MACMU Uncharacterized protein OS=Macaca mulatta OX=9544 GN=PLOD2 PE=4 SV=2;G7MJK6_MACMU Uncharacterized protein (Fragment) OS=Macaca mulatta OX=9544 GN=EGK_12027 PE=4	5	7	7	7	13.1	81.252				95073000	70290000
F6PQ65	Heat shock protein beta-6	HSPB6	F6PQ65	F6PQ65_MACMU Heat shock protein beta-6 OS=Macaca mulatta OX=9544 GN=HSPB6 PE=2 SV=1	1	8	8	8	78.1	17.165	2120000000	1905400000	1394300000	601680000	1431000000	1827000000	1083000000	2314500000	1820600000
I0FGL0	Decorin	DCN	I0FGL0;F6PRM5;G7N7Y2;F6PRM0;F6PQV6;F6PQU4;A0A1D5Q1R0;A0A1D5QVJ6;A0A1D5QGV3;A0A1D5RAT1	I0FGL0_MACMU Decorin OS=Macaca mulatta OX=9544 GN=DCN PE=2 SV=1;F6PRM5_MACMU Decorin OS=Macaca mulatta OX=9544 GN=DCN PE=3 SV=1;G7N7Y2_MACMU Decorin OS=Macaca mulatta OX=9544 GN=DCN PE=2 SV=1;F6PRM0_MACMU Decorin OS=Macaca mulatta OX=9544 GN=DCN PE=3 SV=1	10	12	12	12	41.2	39.844	3300300000	4206600000	4929100000	1593300000	1256600000	1916200000	2137500000	1432600000	3809900000
F6PRP0	Keratan sulfate proteoglycan lumican	LUM	F6PRP0;H9F0P6;A0A1D5QAD8;CON__Q05443;H9FB08	F6PRP0_MACMU Keratan sulfate proteoglycan lumican OS=Macaca mulatta OX=9544 GN=LUM PE=2 SV=1;H9F0P6_MACMU Lumican (Fragment) OS=Macaca mulatta OX=9544 GN=LUM PE=2 SV=1;A0A1D5QAD8_MACMU Uncharacterized protein OS=Macaca mulatta OX=9544 PE=4 SV=1	5	12	12	12	40.5	38.421	4026800000	5983900000	7858700000	2239800000	1347400000	2713100000	3877400000	2180200000	5210400000
F6PS94	Clathrin light chain	CLTA	F6PS94;H9FPR3;A0A1D5QAA8;H9EPP9;H9F105;H9F104;H9YUB6;H9FPR4;G7NFA9;F7AZ71	F6PS94_MACMU Clathrin light chain OS=Macaca mulatta OX=9544 GN=CLTA PE=3 SV=2;H9FPR3_MACMU Clathrin light chain OS=Macaca mulatta OX=9544 GN=CLTA PE=2 SV=1;A0A1D5QAA8_MACMU Clathrin light chain OS=Macaca mulatta OX=9544 GN=CLTA PE=3 SV=1;H9EPP9_MACMU Clath	10	3	3	3	18.1	23.507		12819000	47571000	40317000	55285000	23723000
F6PTP5	Uncharacterized protein	SLC25A20	F6PTP5;F6Q4M5	F6PTP5_MACMU Uncharacterized protein OS=Macaca mulatta OX=9544 GN=SLC25A20 PE=3 SV=1;F6Q4M5_MACMU Mitochondrial carnitine/acylcarnitine carrier protein OS=Macaca mulatta OX=9544 GN=SLC25A20 PE=2 SV=1	2	12	12	12	46.5	25.181	653440000	500280000	315100000	526160000	375780000	546020000	735470000	759200000	563570000
F6PTU2	ATP synthase subunit d, mitochondrial	ATP5PD	F6PTU2;G7NGN5;F6PTT2;A0A1D5Q7U0	F6PTU2_MACMU ATP synthase subunit d, mitochondrial OS=Macaca mulatta OX=9544 GN=ATP5PD PE=2 SV=1;G7NGN5_MACMU ATP synthase subunit d, mitochondrial OS=Macaca mulatta OX=9544 GN=EGK_08966 PE=3 SV=1;F6PTT2_MACMU ATP synthase subunit d, mitochondrial isoform	4	12	8	12	77	18.513	11508000000	13622000000	7293100000	10203000000	8774300000	11758000000	11901000000	13819000000	12793000000
I2CYY2	Lon protease homolog, mitochondrial	LONP1	I2CYY2;F6PU28;F6PU38;A0A1D5Q8P6	I2CYY2_MACMU Lon protease homolog, mitochondrial OS=Macaca mulatta OX=9544 GN=LONP1 PE=2 SV=1;F6PU28_MACMU Lon protease homolog, mitochondrial OS=Macaca mulatta OX=9544 GN=LONP1 PE=3 SV=2;F6PU38_MACMU Lon protease homolog, mitochondrial OS=Macaca mulatta O	4	22	3	22	33.9	106.86	1315600000	1002500000	834320000	1026800000	938850000	1160800000	1149500000	1140600000	1159200000
G7NQ15	Acyl carrier protein	EGK_12602	G7NQ15;F7AF75;F6PU89	G7NQ15_MACMU Acyl carrier protein OS=Macaca mulatta OX=9544 GN=EGK_12602 PE=3 SV=1;F7AF75_MACMU Acyl carrier protein OS=Macaca mulatta OX=9544 GN=PALB2 PE=2 SV=1;F6PU89_MACMU Acyl carrier protein OS=Macaca mulatta OX=9544 PE=3 SV=1	3	6	6	6	23.7	17.489	2119400000	2803100000	1464300000	1869400000	1831800000	1756400000	2321100000	2787400000	2535100000
I2CUJ2	Protein ALEX isoform g	GNAS	I2CUJ2;I2CUJ3;F6PUU7;F7GM59;F6PUT7;F6PV18;F6PUW5;F6PWC1;I0FHX5;I0FHX4;F7GM54;H9FT54;G7NKB9	I2CUJ2_MACMU Protein ALEX isoform g OS=Macaca mulatta OX=9544 GN=GNAS PE=2 SV=1;I2CUJ3_MACMU Protein ALEX GNASS OS=Macaca mulatta OX=9544 GN=GNAS PE=2 SV=1;F6PUU7_MACMU Uncharacterized protein OS=Macaca mulatta OX=9544 GN=GNAS PE=4 SV=2;F7GM59_MACMU Unchar	13	7	6	7	25.6	44.179	281650000	353080000	370990000	318190000	335570000	312280000	422360000	349620000	332770000
F6PV37	Uncharacterized protein	DMD	F6PV37;F7FKS0;F6PV79;F6PV61;F6PV44;F6PV27;F6PV69;H9FQT1;H9Z5Y8;F6PV85;F6PV52;H9FK59;H9FK60;H9FK61;H9YZI9;A0A1D5QWM1;H9FK56;H9FK62;H9FK58;H9FK57;H9FFA7;F7GKT6;H9F8N2;F7ECT8;F7ECU3	F6PV37_MACMU Uncharacterized protein OS=Macaca mulatta OX=9544 GN=DMD PE=4 SV=2;F7FKS0_MACMU Uncharacterized protein OS=Macaca mulatta OX=9544 GN=DMD PE=4 SV=2	25	117	114	117	39.1	426.23	6334600000	5275600000	3995700000	5421000000	3759700000	5955900000	7177500000	6738000000	6811200000
F6PWQ7	Uncharacterized protein	S100P	F6PWQ7;G7MSI3	F6PWQ7_MACMU Uncharacterized protein OS=Macaca mulatta OX=9544 GN=S100P PE=4 SV=2;G7MSI3_MACMU Uncharacterized protein OS=Macaca mulatta OX=9544 GN=EGK_15550 PE=4 SV=1	2	1	1	1	13.7	10.4						59340000
F6PWX4	SUMO-conjugating enzyme UBC9	UBE2I	F6PWX4	F6PWX4_MACMU SUMO-conjugating enzyme UBC9 OS=Macaca mulatta OX=9544 GN=UBE2I PE=2 SV=1	1	1	1	1	7.6	18.007				2547700	22281000	4712600
F6PXX8	Uncharacterized protein	SLK	F6PXX8;F6PXY9;G7N128	F6PXX8_MACMU Uncharacterized protein OS=Macaca mulatta OX=9544 GN=SLK PE=4 SV=1;F6PXY9_MACMU Uncharacterized protein OS=Macaca mulatta OX=9544 GN=SLK PE=4 SV=1;G7N128_MACMU Uncharacterized protein OS=Macaca mulatta OX=9544 GN=EGK_20041 PE=4 SV=1	3	1	1	1	1.1	139.06	11099000	30886000	33599000	45371000	34792000	28378000		32378000	25951000
H9Z6B5	Fatty acid synthase	FASN	H9Z6B5;F6PYE7;H9FR77;G7NHH3	H9Z6B5_MACMU Fatty acid synthase OS=Macaca mulatta OX=9544 GN=FASN PE=2 SV=1;F6PYE7_MACMU Fatty acid synthase OS=Macaca mulatta OX=9544 GN=FASN PE=2 SV=2;H9FR77_MACMU Fatty acid synthase OS=Macaca mulatta OX=9544 GN=FASN PE=2 SV=1;G7NHH3_MACMU Uncharacteri	4	35	35	35	20	272.59	457600000	1712600000	373980000	338960000	990940000	101980000	69041000	81984000	84440000
F6PZ57	Uncharacterized protein	IARS	F6PZ57;H9Z8F3;H9EVI5;G7NF14;F6U933	F6PZ57_MACMU Uncharacterized protein OS=Macaca mulatta OX=9544 GN=IARS PE=4 SV=2;H9Z8F3_MACMU Isoleucyl-tRNA synthetase, cytoplasmic OS=Macaca mulatta OX=9544 GN=IARS PE=2 SV=1;H9EVI5_MACMU Isoleucyl-tRNA synthetase, cytoplasmic OS=Macaca mulatta OX=9544 G	5	6	6	6	6.6	131.82	45318000	38978000	64305000	54984000	100660000	64871000
I2CVN4	Laminin subunit alpha-4 isoform 2	LAMA4	I2CVN4;I0FJ46;I2CVN3;I0FJ45;G7MQQ2;F6PZI2;H9FGD1;H9FHQ1;F7FVB5;F6PZH2;H9FFT3;H9FKZ1;H9FJ36;H9FG48	I2CVN4_MACMU Laminin subunit alpha-4 isoform 2 OS=Macaca mulatta OX=9544 GN=LAMA4 PE=2 SV=1;I0FJ46_MACMU Laminin subunit alpha-4 isoform 2 OS=Macaca mulatta OX=9544 GN=LAMA4 PE=2 SV=1;I2CVN3_MACMU Laminin subunit alpha-4 isoform 1 OS=Macaca mulatta OX=9544	14	16	16	16	11.3	201.95	380900000	332510000	350250000	216120000	253200000	421690000	411030000	403470000	399010000
F7EXG1	Uncharacterized protein	SMARCA5	F7EXG1;F6Q1Z2	F7EXG1_MACMU Uncharacterized protein OS=Macaca mulatta OX=9544 GN=SMARCA5 PE=4 SV=2;F6Q1Z2_MACMU SWI/SNF-related matrix-associated actin-dependent regulator of chromatin subfamily A member 5 OS=Macaca mulatta OX=9544 GN=SMARCA5 PE=2 SV=1	2	1	1	1	1.5	114.68
F7HAC4	Uncharacterized protein	HK1	F7HAC4;F7H4Y8;H9FTP9;F7F7A4;F6Q724;G7N2A3;I2CY11;G7N2A4;F7HAC6;H9FGM9;G7MU33;H9FAU0	F7HAC4_MACMU Uncharacterized protein OS=Macaca mulatta OX=9544 GN=HK1 PE=3 SV=2;F7H4Y8_MACMU Uncharacterized protein OS=Macaca mulatta OX=9544 GN=HK1 PE=3 SV=2;H9FTP9_MACMU Hexokinase-1 isoform HKI OS=Macaca mulatta OX=9544 GN=HK1 PE=2 SV=1;F7F7A4_MACMU Un	12	33	28	33	38.6	100.89	3572600000	3396200000	3768400000	3856400000	3450100000	3692900000	3567900000	3180100000	5073600000
G7ML98	Testis-specific adriamycin sensitivity protein (Fragment)	EGK_13678	G7ML98;F6Q9A7	G7ML98_MACMU Testis-specific adriamycin sensitivity protein (Fragment) OS=Macaca mulatta OX=9544 GN=EGK_13678 PE=4 SV=1;F6Q9A7_MACMU LanC-like protein 2 OS=Macaca mulatta OX=9544 GN=LANCL2 PE=2 SV=1	2	1	1	1	3.5	45.228	27740000	16381000					24016000	13767000	21569000
F7H108	Uncharacterized protein	TXNRD2	F7H108;F7H109;F6Q9R7;I2CTV4;F6Q9Q2;F7H106;F6Q9V7;F6Q9S7	F7H108_MACMU Uncharacterized protein OS=Macaca mulatta OX=9544 GN=TXNRD2 PE=3 SV=2;F7H109_MACMU Uncharacterized protein OS=Macaca mulatta OX=9544 GN=TXNRD2 PE=3 SV=2;F6Q9R7_MACMU Uncharacterized protein OS=Macaca mulatta OX=9544 GN=TXNRD2 PE=3 SV=2;I2CTV4_	8	7	7	7	22.2	53.352	294690000	412880000	181430000	286450000	276750000	630160000	224930000	393990000	406990000
F6QA37	ADP/ATP translocase 1	SLC25A4	F6QA37;G7MSE3;H9H364;A0A1D5QIK2;F6VUM8	F6QA37_MACMU ADP/ATP translocase 1 OS=Macaca mulatta OX=9544 GN=SLC25A4 PE=2 SV=1;G7MSE3_MACMU Uncharacterized protein (Fragment) OS=Macaca mulatta OX=9544 GN=EGK_16284 PE=3 SV=1;H9H364_MACMU Uncharacterized protein OS=Macaca mulatta OX=9544 GN=SLC25A4 PE=	5	19	6	19	57.7	33.064	85995000000	90842000000	53889000000	66558000000	59843000000	83442000000	78562000000	88822000000	75151000000
H9FAA6	Serine/threonine-protein phosphatase PGAM5, mitochondrial isoform 1 (Fragment)	PGAM5	H9FAA6;F6QAL8;H9Z622;H9Z621;G7N6D7	H9FAA6_MACMU Serine/threonine-protein phosphatase PGAM5, mitochondrial isoform 1 (Fragment) OS=Macaca mulatta OX=9544 GN=PGAM5 PE=2 SV=1;F6QAL8_MACMU Uncharacterized protein OS=Macaca mulatta OX=9544 GN=PGAM5 PE=4 SV=2;H9Z622_MACMU Serine/threonine-protein	5	4	4	4	18.2	28.603			50385000	53644000	63936000
F6QDA6	Uncharacterized protein	BDH2	F6QDA6;G7MTJ5	F6QDA6_MACMU Uncharacterized protein OS=Macaca mulatta OX=9544 GN=BDH2 PE=4 SV=2;G7MTJ5_MACMU 3-hydroxybutyrate dehydrogenase type 2 OS=Macaca mulatta OX=9544 GN=BDH2 PE=2 SV=1	2	2	2	2	11.3	26.178		16669000	19049000			18279000		18104000	14116000
H9FZ06	Transaldolase	TALDO1	H9FZ06;F6QDW4;F7CBD5	H9FZ06_MACMU Transaldolase OS=Macaca mulatta OX=9544 GN=TALDO1 PE=2 SV=1;F6QDW4_MACMU Transaldolase OS=Macaca mulatta OX=9544 GN=TALDO1 PE=3 SV=2;F7CBD5_MACMU Transaldolase (Fragment) OS=Macaca mulatta OX=9544 GN=EGK_05827 PE=4 SV=1	3	10	10	10	29.7	37.511	613210000	622660000	742170000	746900000	922470000	568610000	448380000	461300000	333780000
F6QFM9	Uncharacterized protein	LDB3	F6QFM9	F6QFM9_MACMU Uncharacterized protein OS=Macaca mulatta OX=9544 GN=LDB3 PE=4 SV=2	1	20	1	1	46.3	67.885	303060000	778150000	237370000	393750000	349630000	633540000	269600000	544090000	608420000
F6QFV3	Uncharacterized protein	LDB3	F6QFV3	F6QFV3_MACMU Uncharacterized protein OS=Macaca mulatta OX=9544 GN=LDB3 PE=4 SV=1	1	19	0	2	79.6	42.839		431300000	205640000	197990000	292840000	212690000	51577000	300440000	325590000
I2CT60	Catechol O-methyltransferase isoform MB-COMT	COMT	I2CT60;F6QFW9;G7N395	I2CT60_MACMU Catechol O-methyltransferase isoform MB-COMT OS=Macaca mulatta OX=9544 GN=COMT PE=2 SV=1;F6QFW9_MACMU Catechol O-methyltransferase isoform MB-COMT OS=Macaca mulatta OX=9544 GN=COMT PE=2 SV=1;G7N395_MACMU Catechol O-methyltransferase OS=Macaca	3	3	3	3	13.3	30.315	54493000	75582000	43725000				61233000	62064000	36148000
F6XE22	60S ribosomal protein L29	LOC698130	F6XE22;F6YGK8;G7MVU0;F7BRB1;F6VPL0;F6QGB0;G7NT15;F6R7C6;G7N2S0	F6XE22_MACMU 60S ribosomal protein L29 OS=Macaca mulatta OX=9544 GN=LOC698130 PE=3 SV=2;F6YGK8_MACMU 60S ribosomal protein L29 OS=Macaca mulatta OX=9544 GN=LOC704510 PE=3 SV=2;G7MVU0_MACMU 60S ribosomal protein L29 OS=Macaca mulatta OX=9544 GN=EGK_17098 PE	9	2	2	2	16.2	15.712	120210000	132710000	107450000	96324000	134180000	118280000	181930000	133530000	109310000
F6QGV0	Uncharacterized protein	ECI1	F6QGV0;H9F2L2;I0FLG9;A0A1D5R2H8;G7NP35	F6QGV0_MACMU Uncharacterized protein OS=Macaca mulatta OX=9544 GN=ECI1 PE=3 SV=2;H9F2L2_MACMU Enoyl-CoA delta isomerase 1, mitochondrial isoform 1 (Fragment) OS=Macaca mulatta OX=9544 GN=DCI PE=2 SV=1;I0FLG9_MACMU Enoyl-CoA delta isomerase 1 OS=Macaca mula	5	6	6	6	22.1	31.136	3044500000	2964000000	1719300000	2280500000	1646400000	2059500000	1987200000	2321200000	2214100000
H9Z094	Catenin delta-1 isoform 1A	CTNND1	H9Z094;F6QHH2;H9FQE5;F6QHG5;G7ND95;F6QHE6;F6QHF6;F6QHI2	H9Z094_MACMU Catenin delta-1 isoform 1A OS=Macaca mulatta OX=9544 GN=CTNND1 PE=2 SV=1;F6QHH2_MACMU Catenin delta-1 isoform 1A OS=Macaca mulatta OX=9544 GN=CTNND1 PE=2 SV=1;H9FQE5_MACMU Catenin delta-1 isoform 1AC OS=Macaca mulatta OX=9544 PE=2 SV=1;F6QHG5_	8	6	6	6	7.3	104.12	64102000	67331000	96593000	92109000	96115000	66591000	135510000	70050000	100910000
F7BCF5	Rotatin	RTTN	F7BCF5;G7NKW2;F6QHL6	F7BCF5_MACMU Rotatin OS=Macaca mulatta OX=9544 GN=RTTN PE=4 SV=2;G7NKW2_MACMU Rotatin OS=Macaca mulatta OX=9544 GN=EGK_09765 PE=4 SV=1;F6QHL6_MACMU Rotatin OS=Macaca mulatta OX=9544 GN=RTTN PE=4 SV=2	3	2	2	2	1.2	242.59	33223000	55699000	80639000	81236000	99421000	46458000	64751000	27910000	30640000
F6QIA8	Uncharacterized protein	HNRNPDL	F6QIA8;G7MSX6;H9ESS0;F6QI99	F6QIA8_MACMU Uncharacterized protein OS=Macaca mulatta OX=9544 GN=HNRNPDL PE=4 SV=2;G7MSX6_MACMU Heterogeneous nuclear ribonucleoprotein D-like protein (Fragment) OS=Macaca mulatta OX=9544 GN=EGK_15723 PE=4 SV=1;H9ESS0_MACMU Heterogeneous nuclear ribonucle	4	3	2	2	14.4	25.048	50106000	40992000	68377000	70262000	77089000	73883000	56226000	47299000	50545000
F6QIE9	Uncharacterized protein	SORBS1	F6QIE9;F6QIH5	F6QIE9_MACMU Uncharacterized protein OS=Macaca mulatta OX=9544 GN=SORBS1 PE=4 SV=2;F6QIH5_MACMU Uncharacterized protein OS=Macaca mulatta OX=9544 GN=SORBS1 PE=4 SV=2	2	40	1	1	39.5	142.98								29781000
F6QIG3	Uncharacterized protein	SORBS1	F6QIG3	F6QIG3_MACMU Uncharacterized protein OS=Macaca mulatta OX=9544 GN=SORBS1 PE=4 SV=2	1	34	2	2	46.1	101.01		84804000	127740000	86606000	102190000	103020000	133430000	181640000	136120000
F7G234	Uncharacterized protein	SNX1	F7G234;F6QIL5;H9F817;F6QIM2;G7MXS9	F7G234_MACMU Uncharacterized protein OS=Macaca mulatta OX=9544 GN=SNX1 PE=4 SV=1;F6QIL5_MACMU Uncharacterized protein OS=Macaca mulatta OX=9544 GN=SNX1 PE=4 SV=2;H9F817_MACMU Sorting nexin-1 isoform a (Fragment) OS=Macaca mulatta OX=9544 GN=SNX1 PE=2 SV=1;	5	3	2	2	8.8	51.873		18899000		20891000	25020000
G7N0Z5	Nucleoplasmin-3	NPM3	G7N0Z5;F6QIT0	G7N0Z5_MACMU Nucleoplasmin-3 OS=Macaca mulatta OX=9544 GN=NPM3 PE=2 SV=1;F6QIT0_MACMU Uncharacterized protein OS=Macaca mulatta OX=9544 GN=NPM3 PE=4 SV=1	2	1	1	1	9	19.315			31029000		49943000
F6QJD8	Protein S100	S100A8	F6QJD8	F6QJD8_MACMU Protein S100 OS=Macaca mulatta OX=9544 GN=S100A8 PE=2 SV=1	1	4	4	4	39.8	10.821							190830000
F6QK35	Uncharacterized protein	TOM1	F6QK35;F7AB60;H9FND1;G7N3P8;F6QK45;A0A1D5QK42	F6QK35_MACMU Uncharacterized protein OS=Macaca mulatta OX=9544 GN=TOM1 PE=3 SV=2;F7AB60_MACMU Uncharacterized protein OS=Macaca mulatta OX=9544 GN=TOM1 PE=3 SV=2;H9FND1_MACMU Target of Myb protein 1 isoform 1 OS=Macaca mulatta OX=9544 GN=TOM1 PE=2 SV=1;G7N	6	3	3	3	11.9	48.772	15619000	14916000	13526000	11627000	19792000	17794000		20780000
H9F201	Polyadenylate-binding protein 4 isoform 3 (Fragment)	PABPC4	H9F201;F6QKA5;F6XFF9;F6QKE0;F6ZW34;G7MRZ8	H9F201_MACMU Polyadenylate-binding protein 4 isoform 3 (Fragment) OS=Macaca mulatta OX=9544 GN=PABPC4 PE=2 SV=1;F6QKA5_MACMU Polyadenylate-binding protein OS=Macaca mulatta OX=9544 GN=PABPC4 PE=2 SV=1;F6XFF9_MACMU Polyadenylate-binding protein OS=Macaca mu	6	9	4	4	19.8	54.226	120260000	104710000	137960000	122250000	166560000	122660000	139400000	94454000	116830000
F7H1Y3	DNA helicase	MCM5	F7H1Y3;G7N3Q0;F6QKN8	F7H1Y3_MACMU DNA helicase OS=Macaca mulatta OX=9544 GN=MCM5 PE=3 SV=2;G7N3Q0_MACMU DNA helicase OS=Macaca mulatta OX=9544 GN=MCM5 PE=2 SV=1;F6QKN8_MACMU DNA helicase OS=Macaca mulatta OX=9544 GN=MCM5 PE=2 SV=2	3	3	3	3	6.4	77.539		140150000	43626000	48517000	73301000		30934000
H9EPJ5	Dolichyl-diphosphooligosaccharide--protein glycosyltransferase subunit STT3A	STT3A	H9EPJ5;F6QL03;F6YC80;F6YC64	H9EPJ5_MACMU Dolichyl-diphosphooligosaccharide--protein glycosyltransferase subunit STT3A OS=Macaca mulatta OX=9544 GN=STT3A PE=2 SV=1;F6QL03_MACMU Uncharacterized protein OS=Macaca mulatta OX=9544 GN=STT3A PE=4 SV=2;F6YC80_MACMU Uncharacterized protein OS	4	3	3	3	4.5	80.529			63749000		74532000	50422000
F6QM91	Mature T-cell proliferation 1 neighbor protein	MTCP1NB	F6QM91	F6QM91_MACMU Mature T-cell proliferation 1 neighbor protein OS=Macaca mulatta OX=9544 GN=MTCP1NB PE=2 SV=1	1	2	2	2	42.6	7.7309		39574000		17192000					16760000
F6QMB1	FUN14 domain-containing protein 2	FUNDC2	F6QMB1;H9FYR9;Q7YRC0;F6QMA3;F6Q5U7;A0A1D5QXT5	F6QMB1_MACMU FUN14 domain-containing protein 2 OS=Macaca mulatta OX=9544 GN=FUNDC2 PE=4 SV=2;H9FYR9_MACMU FUN14 domain-containing protein 2 OS=Macaca mulatta OX=9544 GN=FUNDC2 PE=2 SV=1;FUND2_MACMU FUN14 domain-containing protein 2 OS=Macaca mulatta OX=954	6	5	5	5	36.9	16.492	246110000	235560000	138040000	213060000	167790000	220280000	152590000	209560000	236880000
F6QN38	Uncharacterized protein	RYR2	F6QN38;F6QN17;A0A1D5R0U3;A0A1D5QH19;A0A1D5QXA6;G7MFM8;A0A1D5QVY5;H9FLP8;H9FLP9;H9FLQ2;H9FLQ1;H9FIY8;F7HB93;H9FLQ0;H9FJB2;F7HB95;F6VTD4;G7NNI3	F6QN38_MACMU Uncharacterized protein OS=Macaca mulatta OX=9544 GN=RYR2 PE=4 SV=2;F6QN17_MACMU Uncharacterized protein OS=Macaca mulatta OX=9544 GN=RYR2 PE=4 SV=2;A0A1D5R0U3_MACMU Uncharacterized protein OS=Macaca mulatta OX=9544 GN=RYR2 PE=4 SV=1;A0A1D5QH1	18	81	62	81	21.1	561.13	2061000000	1896400000	1344800000	1781200000	1505000000	2238200000	1777300000	2169800000	1979100000
F6QQS0	E3 ubiquitin-protein ligase MARCH5	MARCH5	F6QQS0	F6QQS0_MACMU E3 ubiquitin-protein ligase MARCH5 OS=Macaca mulatta OX=9544 GN=MARCH5 PE=2 SV=1	1	2	2	2	10.1	31.231					14680000	21648000
F6QR30	Histone H3	LOC693887	F6QR30;H9F350;F6TK66;G7NS77	F6QR30_MACMU Histone H3 OS=Macaca mulatta OX=9544 GN=LOC693887 PE=2 SV=1;H9F350_MACMU Histone H3.3 (Fragment) OS=Macaca mulatta OX=9544 GN=H3F3B PE=2 SV=1;F6TK66_MACMU Histone H3 OS=Macaca mulatta OX=9544 GN=LOC699015 PE=3 SV=1;G7NS77_MACMU Histone H3 OS=M	4	4	1	1	35.3	15.328	51089000	176170000	59199000	42552000	45995000			17191000	44587000
F6QRE8	Tubulin alpha chain	TUBA4A	F6QRE8;G7N8Z6;A0A1D5R053;F6QRF8;F7BVM0;H9Z493	F6QRE8_MACMU Tubulin alpha chain OS=Macaca mulatta OX=9544 GN=TUBA4A PE=2 SV=1;G7N8Z6_MACMU Tubulin alpha chain (Fragment) OS=Macaca mulatta OX=9544 GN=EGK_04820 PE=3 SV=1;A0A1D5R053_MACMU Tubulin alpha chain OS=Macaca mulatta OX=9544 GN=TUBA4A PE=3 SV=1;F	6	21	2	21	57.6	49.924	6806700000	7554100000	12015000000	9323800000	12455000000	7899200000	8115300000	4628500000	6362300000
G7MEE8	Uncharacterized protein (Fragment)	EGK_01596	G7MEE8;H9F711;F6QTK2	G7MEE8_MACMU Uncharacterized protein (Fragment) OS=Macaca mulatta OX=9544 GN=EGK_01596 PE=4 SV=1;H9F711_MACMU Golgi resident protein GCP60 (Fragment) OS=Macaca mulatta OX=9544 GN=ACBD3 PE=2 SV=1;F6QTK2_MACMU Uncharacterized protein OS=Macaca mulatta OX=954	3	2	2	2	4.7	51.951	36608000		35424000	44575000	45612000				61133000
F6QU25	Uncharacterized protein	KRT5	F6QU25;H9Z8R8;A0A1D5QSI8	F6QU25_MACMU Uncharacterized protein OS=Macaca mulatta OX=9544 GN=KRT5 PE=3 SV=2;H9Z8R8_MACMU Keratin, type II cytoskeletal 5 OS=Macaca mulatta OX=9544 GN=KRT5 PE=2 SV=1	3	12	0	4	20.9	53.518	27422000			19874000		25902000	24343000	64413000
F6QVJ1	Uncharacterized protein	LOC707468	F6QVJ1;G7MNQ7	F6QVJ1_MACMU Uncharacterized protein OS=Macaca mulatta OX=9544 GN=LOC707468 PE=3 SV=2;G7MNQ7_MACMU Uncharacterized protein (Fragment) OS=Macaca mulatta OX=9544 GN=EGK_13483 PE=3 SV=1	2	5	1	1	3.1	223.44					40436000
I0FUW1	Tryptophanyl-tRNA synthetase, cytoplasmic isoform a	WARS	I0FUW1;H9FZE6;G7MW56;F6QVP0;F6QVM3	I0FUW1_MACMU Tryptophanyl-tRNA synthetase, cytoplasmic isoform a OS=Macaca mulatta OX=9544 GN=WARS PE=2 SV=1;H9FZE6_MACMU Tryptophanyl-tRNA synthetase, cytoplasmic isoform a OS=Macaca mulatta OX=9544 GN=WARS PE=2 SV=1;G7MW56_MACMU Uncharacterized protein O	5	11	11	11	33.7	53.285	290650000	295470000	297960000	297280000	369580000	264700000	440410000	229680000	384690000
F6QVU7	Endoplasmic reticulum resident protein 29 isoform 1	ERP29	F6QVU7;A0A1D5QN23;G7N5N7;Q3YAG4;Q3YAI4;H9F9X4	F6QVU7_MACMU Endoplasmic reticulum resident protein 29 isoform 1 OS=Macaca mulatta OX=9544 GN=ERP29 PE=2 SV=1;A0A1D5QN23_MACMU Uncharacterized protein OS=Macaca mulatta OX=9544 GN=ERP29 PE=4 SV=1;G7N5N7_MACMU Uncharacterized protein (Fragment) OS=Macaca mu	6	6	6	6	33	28.942	159410000	161600000	343240000	312700000	427880000	235390000	167120000	132360000	144690000
H9ZD50	Cytochrome b-c1 complex subunit 2, mitochondrial	UQCRC2	H9ZD50;F6QWF3;F7HJV7;G7NPZ8;H9EYZ1;F6QWE2;A0A1D5RI93;A0A1D5RC71;A0A1D5QZ13	H9ZD50_MACMU Cytochrome b-c1 complex subunit 2, mitochondrial OS=Macaca mulatta OX=9544 GN=UQCRC2 PE=2 SV=1;F6QWF3_MACMU Cytochrome b-c1 complex subunit 2, mitochondrial OS=Macaca mulatta OX=9544 GN=UQCRC2 PE=2 SV=2;F7HJV7_MACMU Uncharacterized protein OS=	9	24	24	24	76.4	48.451	34662000000	33053000000	18912000000	26085000000	23780000000	29347000000	32986000000	32975000000	36522000000
F7CTE8	Uncharacterized protein	ABHD16A	F7CTE8;F6QWW1;H9ZDH7;F6QWX1	F7CTE8_MACMU Uncharacterized protein OS=Macaca mulatta OX=9544 GN=ABHD16A PE=4 SV=2;F6QWW1_MACMU Uncharacterized protein OS=Macaca mulatta OX=9544 GN=ABHD16A PE=4 SV=1;H9ZDH7_MACMU Abhydrolase domain-containing protein 16A isoform a OS=Macaca mulatta OX=95	4	1	1	1	2.1	59.239		16277000							18773000
F6QZS9	Dynein light chain Tctex-type 1	DYNLT1	F6QZS9	F6QZS9_MACMU Dynein light chain Tctex-type 1 OS=Macaca mulatta OX=9544 GN=DYNLT1 PE=4 SV=2	1	2	2	2	30.1	12.452	28468000	36906000					45378000	33583000	28326000
F6R0C8	Uncharacterized protein	MYH11	F6R0C8;A0A1D5QIG3;A0A1D5QVD9	F6R0C8_MACMU Uncharacterized protein OS=Macaca mulatta OX=9544 GN=MYH11 PE=3 SV=2;A0A1D5QIG3_MACMU Uncharacterized protein OS=Macaca mulatta OX=9544 GN=MYH11 PE=3 SV=1	3	103	1	9	53.7	223.55	186530000	224740000	3256000000	32562000	20198000	34257000	35191000	29956000	59268000
H9FZC6	Utrophin	UTRN	H9FZC6;F6R0R2;A0A1D5RBB6;F7GKT3;F7GKS8;A0A1D5QJW1	H9FZC6_MACMU Utrophin OS=Macaca mulatta OX=9544 GN=UTRN PE=2 SV=1;F6R0R2_MACMU Uncharacterized protein OS=Macaca mulatta OX=9544 GN=UTRN PE=4 SV=2;A0A1D5RBB6_MACMU Uncharacterized protein OS=Macaca mulatta OX=9544 GN=UTRN PE=4 SV=1;F7GKT3_MACMU Uncharacter	6	9	6	6	3.4	394.56		28768000	21715000				19873000	20804000	24120000
F6R182	Uncharacterized protein	SLC12A7	F6R182;G7NBH1	F6R182_MACMU Uncharacterized protein OS=Macaca mulatta OX=9544 GN=SLC12A7 PE=4 SV=2;G7NBH1_MACMU Electroneutral potassium-chloride cotransporter 4 (Fragment) OS=Macaca mulatta OX=9544 GN=EGK_06780 PE=4 SV=1	2	6	6	6	7.3	115.43	51053000	31606000	31803000	44786000	45393000	35981000	42058000	30452000	57529000
G7NDS7	L-lactate dehydrogenase	LDHA	G7NDS7;F6R1N2;A0A1D5QIV0;F7E6F6;A0A1D5Q4A7;F7E6P2;A0A1D5RBG3;A0A1D5Q706;A0A1D5QD53;A0A1D5QHP8;F7GNJ2;F6R1L3;F7GPU7;F6QUY2;A0A1D5Q8A5;F7GNJ6	G7NDS7_MACMU L-lactate dehydrogenase OS=Macaca mulatta OX=9544 GN=LDHA PE=2 SV=1;F6R1N2_MACMU L-lactate dehydrogenase OS=Macaca mulatta OX=9544 GN=LDHA PE=2 SV=2;A0A1D5QIV0_MACMU L-lactate dehydrogenase OS=Macaca mulatta OX=9544 GN=LDHA PE=3 SV=1;F7E6F6_MA	16	21	16	21	72.3	36.631	3364100000	3425500000	9738600000	8899400000	11469000000	4988700000	1572500000	1559000000	1792400000
F6R1X3	26S proteasome non-ATPase regulatory subunit 2	PSMD2	F6R1X3;G7MJ54;F6R1Z7;A0A1D5QP15;A0A1D5R9Q4	F6R1X3_MACMU 26S proteasome non-ATPase regulatory subunit 2 OS=Macaca mulatta OX=9544 GN=PSMD2 PE=2 SV=2;G7MJ54_MACMU Uncharacterized protein (Fragment) OS=Macaca mulatta OX=9544 GN=EGK_11835 PE=4 SV=1;F6R1Z7_MACMU Uncharacterized protein OS=Macaca mulatta	5	16	16	16	23.8	100.21	253580000	272080000	390160000	337770000	469770000	378890000	281120000	264210000	215390000
F6R248	Histidine triad nucleotide-binding protein 1	HINT1	F6R248;G7MTX7;A0A1D5R0A3;H9EYP5;A0A1D5RF73	F6R248_MACMU Histidine triad nucleotide-binding protein 1 OS=Macaca mulatta OX=9544 GN=HINT1 PE=2 SV=1;G7MTX7_MACMU Uncharacterized protein OS=Macaca mulatta OX=9544 GN=EGK_16822 PE=4 SV=1;A0A1D5R0A3_MACMU Uncharacterized protein OS=Macaca mulatta OX=9544	5	6	6	6	73.8	13.774	662660000	808640000	472450000	681040000	628620000	672230000	690910000	622930000	769230000
H9ZE84	SPARC-like protein 1	SPARCL1	H9ZE84;G7MTD2;F6R2E7	H9ZE84_MACMU SPARC-like protein 1 OS=Macaca mulatta OX=9544 GN=SPARCL1 PE=2 SV=1;G7MTD2_MACMU High endothelial venule protein OS=Macaca mulatta OX=9544 GN=EGK_15908 PE=4 SV=1;F6R2E7_MACMU Uncharacterized protein OS=Macaca mulatta OX=9544 GN=SPARCL1 PE=4 SV	3	1	1	1	2.6	75.026	3431400	5285300
F6R3I0	Uncharacterized protein	HSD17B11	F6R3I0;G7MTD0;F6R2R6;I0FSA5	F6R3I0_MACMU Uncharacterized protein OS=Macaca mulatta OX=9544 GN=HSD17B11 PE=4 SV=2;G7MTD0_MACMU Estradiol 17-beta-dehydrogenase 11 OS=Macaca mulatta OX=9544 GN=HSD17B11 PE=2 SV=1;F6R2R6_MACMU Estradiol 17-beta-dehydrogenase 11 OS=Macaca mulatta OX=9544 G	4	8	8	8	35.9	28.116	225240000	149660000	183530000	57612000	111350000	201300000	301740000	450800000	226610000
H9G257	BAG family molecular chaperone regulator 3	BAG3	H9G257;F6R2V4	H9G257_MACMU BAG family molecular chaperone regulator 3 OS=Macaca mulatta OX=9544 GN=BAG3 PE=2 SV=1;F6R2V4_MACMU BAG family molecular chaperone regulator 3 OS=Macaca mulatta OX=9544 GN=BAG3 PE=2 SV=1	2	29	3	29	65	61.577	1203400000	1035100000	791140000	985100000	1124400000	1136500000	2601000000	1488100000	1427400000
I2CUK1	Putative ATP-dependent RNA helicase DDX17 isoform 1	DDX17	I2CUK1;F6R2W4;I2CYF4;G7N3V2;F6ZKR3;A0A1D5RKI2;Q6UIQ8	I2CUK1_MACMU Putative ATP-dependent RNA helicase DDX17 isoform 1 OS=Macaca mulatta OX=9544 GN=DDX17 PE=2 SV=1;F6R2W4_MACMU Uncharacterized protein OS=Macaca mulatta OX=9544 GN=DDX17 PE=3 SV=2;I2CYF4_MACMU Putative ATP-dependent RNA helicase DDX17 isoform 3	7	12	8	8	21.7	80.242	172950000	263370000	163360000	312780000	523920000	308610000	265830000	146880000	131370000
F6R318	Uncharacterized protein	LOC693573	F6R318;G7N3W4;F7G1Z3;F7CNW1;F6Q1C0;A0A1D5R9C7;A0A1D5QM12;F6U2V9	F6R318_MACMU Uncharacterized protein OS=Macaca mulatta OX=9544 GN=LOC693573 PE=3 SV=2;G7N3W4_MACMU Uncharacterized protein OS=Macaca mulatta OX=9544 GN=EGK_03058 PE=3 SV=1;F7G1Z3_MACMU Uncharacterized protein OS=Macaca mulatta OX=9544 GN=LOC709201 PE=4 SV=	8	14	12	14	42.9	46.108	109090000	302850000	1095100000	1109400000	2018600000	531960000	362090000	52268000	139660000
F6R3L3	T-complex protein 1 subunit gamma	CCT3	F6R3L3;G7MDZ6;F6W9W5;F6WGI5	F6R3L3_MACMU T-complex protein 1 subunit gamma OS=Macaca mulatta OX=9544 GN=CCT3 PE=3 SV=2;G7MDZ6_MACMU T-complex protein 1 subunit gamma OS=Macaca mulatta OX=9544 GN=CCT3 PE=2 SV=1;F6W9W5_MACMU T-complex protein 1 subunit gamma OS=Macaca mulatta OX=9544 G	4	18	18	18	42	60.305	689320000	800870000	1454300000	1619100000	1704200000	1082500000	956510000	1022300000	567550000
H9F3P7	Putative glutamyl-tRNA synthetase, mitochondrial (Fragment)	EARS2	H9F3P7;F6R4X7;G7NQ14	H9F3P7_MACMU Putative glutamyl-tRNA synthetase, mitochondrial (Fragment) OS=Macaca mulatta OX=9544 GN=EARS2 PE=2 SV=1;F6R4X7_MACMU Uncharacterized protein OS=Macaca mulatta OX=9544 GN=EARS2 PE=3 SV=2;G7NQ14_MACMU Uncharacterized protein OS=Macaca mulatta O	3	3	3	3	8.3	56.79	20332000	21975000	41171000	56890000	29182000	42045000	20325000	61597000	40009000
H9ZCA8	Serine/arginine-rich splicing factor 1 isoform 1	SRSF1	H9ZCA8;F6R520;H9EUH6;F7DJ34;G7N8I1;A0A1D5Q1A7;G7NHR3;A0A1D5R6H0	H9ZCA8_MACMU Serine/arginine-rich splicing factor 1 isoform 1 OS=Macaca mulatta OX=9544 GN=SRSF1 PE=2 SV=1;F6R520_MACMU Uncharacterized protein OS=Macaca mulatta OX=9544 GN=SRSF1 PE=4 SV=2;H9EUH6_MACMU Serine/arginine-rich splicing factor 1 isoform 2 OS=Ma	8	8	8	8	37.9	27.744	40380000	99865000	183920000	250680000	332070000	145340000	102020000	56499000	44973000
G7N2S9	Nucleolar protein 5A (Fragment)	EGK_02598	G7N2S9;F6R553	G7N2S9_MACMU Nucleolar protein 5A (Fragment) OS=Macaca mulatta OX=9544 GN=EGK_02598 PE=4 SV=1;F6R553_MACMU Nucleolar protein 56 OS=Macaca mulatta OX=9544 GN=NOP56 PE=2 SV=2	2	4	4	4	9.6	66.029			37489000	59437000	47627000	38318000	29622000	20873000
H9FPB6	Endoplasmic reticulum lipid raft-associated protein 2	ERLIN2	H9FPB6;F6R5W0;F6R5V2;G7N0W9;F6X927	H9FPB6_MACMU Endoplasmic reticulum lipid raft-associated protein 2 OS=Macaca mulatta OX=9544 GN=ERLIN2 PE=2 SV=1;F6R5W0_MACMU Uncharacterized protein OS=Macaca mulatta OX=9544 GN=ERLIN2 PE=4 SV=2	5	7	7	7	29.8	37.805	129430000	115530000	130690000	97337000	124150000	106610000	103570000	132310000	125650000
H9YXI7	Monocarboxylate transporter 4	SLC16A3	H9YXI7;F6R637;H9FCI7;F6TNP3	H9YXI7_MACMU Monocarboxylate transporter 4 OS=Macaca mulatta OX=9544 GN=SLC16A3 PE=2 SV=1;F6R637_MACMU Uncharacterized protein OS=Macaca mulatta OX=9544 GN=SLC16A3 PE=4 SV=1;H9FCI7_MACMU Monocarboxylate transporter 4 (Fragment) OS=Macaca mulatta OX=9544 GN	4	2	2	2	4.5	49.3			16125000	18978000	28484000
H9G0X3	Lamin-B2	LMNB2	H9G0X3;F6R7X5;G7NL73	H9G0X3_MACMU Lamin-B2 OS=Macaca mulatta OX=9544 GN=LMNB2 PE=2 SV=1;F6R7X5_MACMU Uncharacterized protein OS=Macaca mulatta OX=9544 GN=LMNB2 PE=3 SV=2;G7NL73_MACMU Lamin-B2 (Fragment) OS=Macaca mulatta OX=9544 GN=EGK_09879 PE=3 SV=1	3	25	22	24	41.9	67.671	1010900000	985220000	888960000	828060000	790740000	795370000	858860000	700020000	673030000
[truncated: 1,729 more rows]

## Sheet: 联合分析-OBvsCON
Protein	Protein Name	Gene Name
F6X9Q4	mRNA export factor	RAE1
[truncated: 58 more rows]
